# Supplementary material for: Photoinduced regioselective difluorination of secondary inert C(sp3)–H bonds in sulfonamides via 1,5-hydrogen-atom transfer
Source: Royal Society of Chemistry journal article supplement (doi:10.1039/d3qo00931a), 2023-01-01

## Supplementary Information

### **Photoinduced Regioselective Difluorination of Secondary Inert C(sp<sup>3</sup>)-H Bonds in Sulfonamides *via* 1,5-Hydrogen-Atom Transfer**

Zhi Chen,<sup>a</sup> Wenkai Zhu,<sup>a</sup> Chaodong Wang,<sup>a</sup> Ning Xu,<sup>a</sup> Qianxi Jin,<sup>a</sup> Xule Huang,<sup>a</sup> Shengjie Song,<sup>a</sup> and Jianjun Li,<sup>\*a,b</sup>

<sup>a</sup> Key Laboratory for Green Pharmaceutical Technologies and Related Equipment of Ministry of Education, College of Pharmaceutical Sciences, Zhejiang University of Technology, Hangzhou 310014, P. R. China.

<sup>b</sup> Taizhou Research Institute, Zhejiang University of Technology, Taizhou 318000, P. R. of China.

\* Corresponding author. E-mail: lijianjun@zjut.edu.cn.

## Table of content

|                                                                                                                                            |            |
|--------------------------------------------------------------------------------------------------------------------------------------------|------------|
| <b>1. General Information.....</b>                                                                                                         | <b>S3</b>  |
| <b>2. Detailed Description of the Blue LED Light Source and Photoreactor.....</b>                                                          | <b>S4</b>  |
| <b>3. General Procedure.....</b>                                                                                                           | <b>S6</b>  |
| <b>3.1 General procedure A:</b> Preparation of N-protected amine substrates from free amines and sulfonyl chloride (or acyl chloride)..... | <b>S6</b>  |
| <b>3.2 General procedure B:</b> Preparation of N-protected amine substrates from free alcohols intermediates and sulfonyl chloride.....    | <b>S6</b>  |
| <b>3.3 General procedure C:</b> Preparation of N-protected amine substrates from free alcohol intermediates and acid .....                 | <b>S7</b>  |
| <b>3.4 General procedure D:</b> Preparation of N-protected amine substrates from 7-aminoheptanoic acid hydrochloride and acid .....        | <b>S7</b>  |
| <b>3.5 General procedure E:</b> Remote C(sp <sup>3</sup> )-H difluorination reaction .....                                                 | <b>S8</b>  |
| <b>3.6 Procedures for preparation of specific substrates .....</b>                                                                         | <b>S9</b>  |
| <b>4. UV/Vis Absorption Spectra.....</b>                                                                                                   | <b>S15</b> |
| <b>5. Stern-Volmer Quenching Experiments .....</b>                                                                                         | <b>S16</b> |
| <b>6. Quantum Yield Measurements.....</b>                                                                                                  | <b>S17</b> |
| <b>7. Gram-scale Experiment .....</b>                                                                                                      | <b>S19</b> |
| <b>8. Deprotection and Late-stage Functionalization Experiment.....</b>                                                                    | <b>S20</b> |
| <b>9. Unsuccessful Substrate .....</b>                                                                                                     | <b>S21</b> |
| <b>10. Mechanistic Investigation.....</b>                                                                                                  | <b>S22</b> |
| <b>11. Characterization Data .....</b>                                                                                                     | <b>S23</b> |
| <b>11.1 Intermediates .....</b>                                                                                                            | <b>S23</b> |
| <b>11.2 Sulfonamides .....</b>                                                                                                             | <b>S24</b> |
| <b>11.3 Fluorinated Products.....</b>                                                                                                      | <b>S37</b> |
| <b>11.4 Other .....</b>                                                                                                                    | <b>S52</b> |
| <b>12. References.....</b>                                                                                                                 | <b>S54</b> |
| <b>13. NMR Spectra.....</b>                                                                                                                | <b>S55</b> |

## 1. General Information

The reagents and solvents were purchased from commercial suppliers and used without further purification unless noted. All reactions were monitored by TLC with silica gel-coated plates.  $^1\text{H}$  (400 MHz) NMR,  $^{13}\text{C}$  (101 MHz) NMR, and  $^{19}\text{F}$  (376 MHz) NMR spectra were recorded on a Varian spectrometer in  $\text{CDCl}_3$  or  $\text{DMSO}-d_6$  using tetramethylsilane (TMS) as internal standards. Data are reported as follows: Chemical shift (number of protons, multiplicity, coupling constants). Coupling constants were quoted to the nearest 0.1 Hz and multiplicity reported according to the following convention: s = singlet, d = doublet, t = triplet, q = quartet, m = multiplet, dd = doublet of doublets, dt = doublet of triplets, td = triplet of doublets, tt = triplet of triplets, brs = broad singlet. Mass spectra were measured with a HRMS-APCI instrument using ESI ionization. UV/vis absorption spectra and fluorescence quenching experiments were conducted on a Hitachi F-7000 FL Spectrophotometer and F97Pro Spectrophotometer. The LED lights was purchased from Xuzhou Ai Jia Electronic Technology Co., Ltd. in Taobao.com.

## 2. Detailed Description of the Blue LED Light Source and Photoreactor

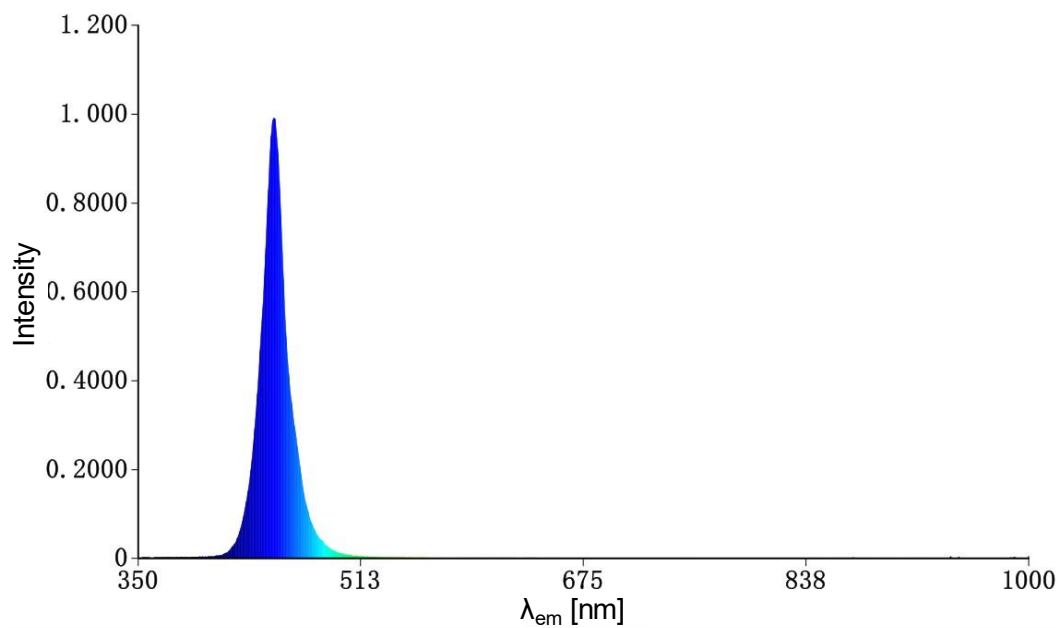

**Figure S1.** The emission spectrum of the 450-460 nm blue LED light.

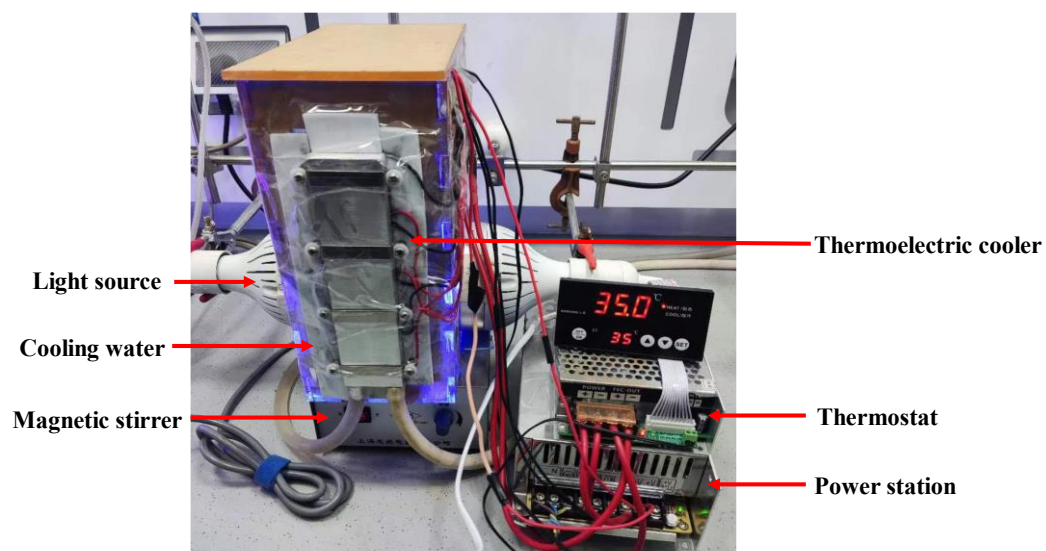

**Figure S2.** The detailed picture of the photoreactor with temperature control



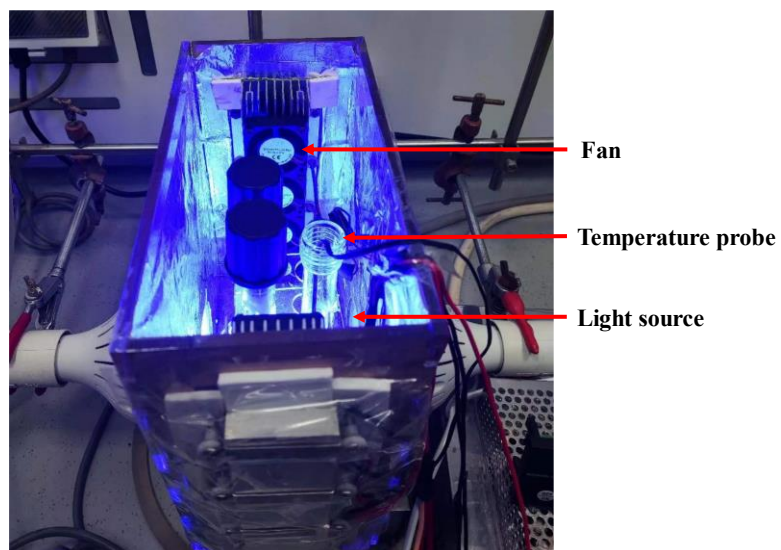

**Figure S3.** The internal structure of the photoreactor

### 3. General Procedure

#### 3.1 General procedure A: Preparation of N-protected amine substrates from free amines and sulfonyl chloride (or acyl chloride)

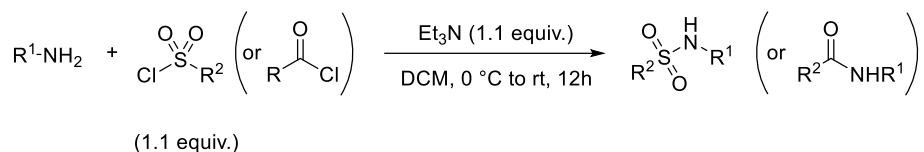

N-protected amine substrates are prepared from carboxylic amines and sulfonyl chloride (or acyl chloride) according to the literature<sup>1</sup> with minor modifications. Free amine (5.0 mmol, 1.0 equiv.) and Et<sub>3</sub>N (5.5 mmol, 1.1 equiv.) were dissolved in DCM (25 mL) at 0 °C. A DCM solution (5 mL) of corresponding sulfonyl chloride (5.5 mmol, 1.1 equiv.) (or acyl chloride) was added slowly over 5 minutes. After the addition was completed, the mixture was allowed to warm to room temperature and the solution was allowed to stir for 24 hours. The reaction mixture was quenched with water (5 mL) and 1.0 M HCl (11 mL). The aqueous phase was extracted with 10 mL×3 DCM. Combined organic phases were dried with anhydrous Na<sub>2</sub>SO<sub>4</sub> and concentrated under reduced pressure. The crude product was purified by flash chromatography on silica gel (PE/EtOAc).

#### 3.2 General procedure B: Preparation of N-protected amine substrates from free alcohols intermediates and sulfonyl chloride

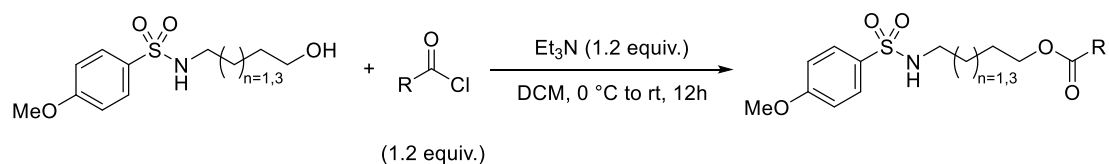

Alcohol (2.0 mmol, 1.0 equiv.) and Et<sub>3</sub>N (2.2 mmol, 1.2 equiv.) were dissolved in DCM (25 mL) at 0 °C. A DCM solution (5 mL) of corresponding acyl chloride (2.2 mmol, 1.2 equiv.) was added slowly over 5 minutes. After the addition was completed, the mixture was allowed to warm to room temperature and the solution was allowed to stir for 12 hours. The reaction mixture was quenched with water (5 mL) and a saturated NaHCO<sub>3</sub> solution (5 mL). The aqueous phase was extracted with 10 mL×3 DCM. Combined organic phases were dried with anhydrous Na<sub>2</sub>SO<sub>4</sub> and concentrated under reduced pressure. The crude product was purified by flash chromatography on silica gel (PE/EtOAc).

**3.3 General procedure C:** Preparation of N-protected amine substrates from free alcohol intermediates and acid

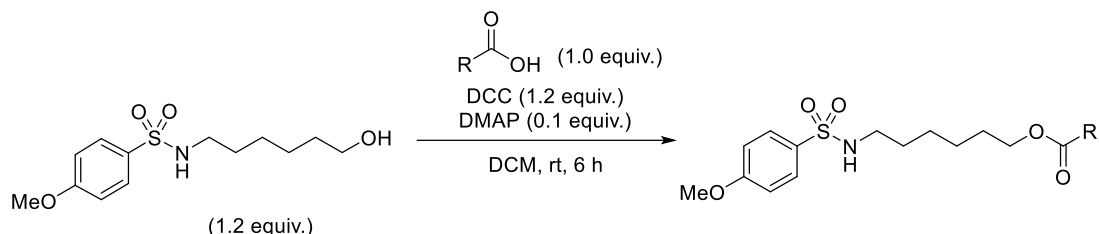

To a solution of acid (1 mmol, 1.0 equiv.), *N*-(6-hydroxyhexyl)-4-methoxybenzenesulfonamide (1.2 mmol, 1.2 equiv.), and DMAP (0.1 mmol, 0.1 equiv.) in dry DCM (5 mL) were added DCC (1.2 mmol, 1.0 equiv.). The reaction mixture was allowed to stir at room temperature for 6 hours and then concentrated under reduced pressure. Cold 10 mL EtOAc was added to the residue and dicyclohexyl urea was filtered off. The solution was concentrated under reduced pressure, and the crude product was purified by flash chromatography on silica gel (PE/EtOAc).

**3.4 General procedure D:** Preparation of N-protected amine substrates from 7-aminoheptanoic acid hydrochloride and acid

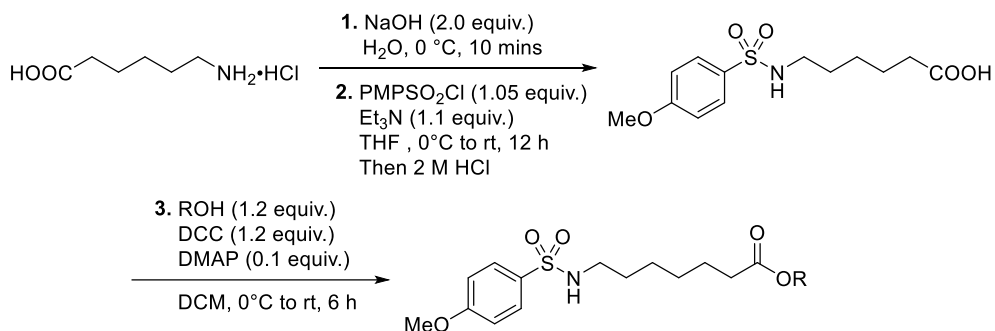

**STEP 1:** 7-aminoheptanoic acid hydrochloride (5 mmol, 1.0 equiv.) was dissolved in 15 mL water and stirred at 0 °C. To this solution, 10 mL 1M NaOH was added slowly over 5 minutes and the mixture was stirred for 10 minutes.

**STEP 2:** Et<sub>3</sub>N (5.5 mmol, 1.1 equiv.) was added to the reaction mixture was obtained from STEP 1, and a solution of sulfonyl chloride (5.25 mmol, 1.05 equiv.) in THF (5 mL) was added slowly over 5 minutes at 0 °C. After the addition was completed, the mixture was allowed to warm to room temperature and stirred for 12 hours. After the reaction mixture (aqueous solution) was extracted

with ether (20 mL) to remove impurities, the aqueous phase was set aside. The ether phase (upper layer) was washed with 20 mL 2M NaOH aqueous solution to recover some lost product. The aqueous phase from the first extraction was combined with the NaOH solution from the second extraction. The combined solution was adjusted to pH 2 with 1M HCl aqueous solution at 0 °C. It was extracted with 30 mL×3 EtOAc and the organic phase was dried with saturated salt water and anhydrous Na<sub>2</sub>SO<sub>4</sub> sequentially, concentrated under reduced pressure. A crude product was obtained as a white solid without further purification..

**STEP 3:** To a solution of acid (1.2 mmol, 1.2 equiv.) from STEP 2, alcohol (1.0 mmol, 1.0 equiv.) and DMAP (0.1 mmol, 0.1 equiv.) in dry DCM (5 mL) at 0 °C, DCC (1.2 mmol, 1.0 equiv.) was then added. The reaction mixture was allowed to stir at room temperature for 6 hours and then concentrated under reduced pressure. Cold 10 mL EtOAc was added to the residue and dicyclohexyl urea was filtered off. The solution was concentrated under reduced pressure, and the crude product was purified by flash chromatography on silica gel (PE/EtOAc) to give the desired product.

### 3.5 General procedure E: Remote C(sp<sup>3</sup>)-H difluorination reaction

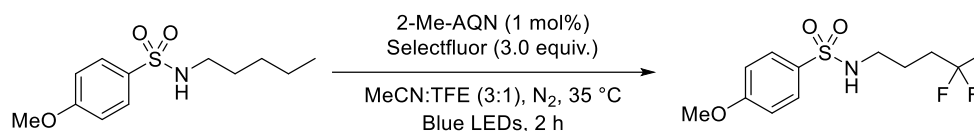

A mixture of N-protected amines **1a** (0.2 mmol, 1.0 equiv.), 2-methylantraquinone (2 mL, 1.0 μmol/mL in MeCN, 2.0 μmol, 0.01 equiv.) and Selectfluor (0.6 mmol, 3.0 equiv.) were added to a 10 mL Schlenk tube containing CH<sub>3</sub>CN/TFE (2.0 mL/1.33 mL). The tube was degassed by ultrasonication for 5 minutes and then evacuated and backfilled with nitrogen for three times. The mixture was stirred under blue LED lights ( $\lambda = 450\text{-}460\text{ nm}$ ,  $2 \times 25\text{ W}$ ) at 35 °C for 2 hours and then was concentrated under reduced pressure. The residue was dissolved in EtOAc and then filtered to remove insoluble material. The solution was concentrated under reduced pressure and an internal standard of trifluorotoluene (1 drop, about 15 mg) was added. The yield was determined by comparing the integration of the crude product's <sup>19</sup>F NMR with that of the internal standard. Alternatively, the product was purified by column chromatography on silica (PE/EtOAc = 3/1).

### 3.6 Procedures for preparation of specific substrates

#### methyl (S)-2-((4-methoxyphenyl)sulfonamido)hexanoate and methyl (S)-2-((S)-2-((4-methoxyphenyl)sulfonamido)hexanamido)hexanoate

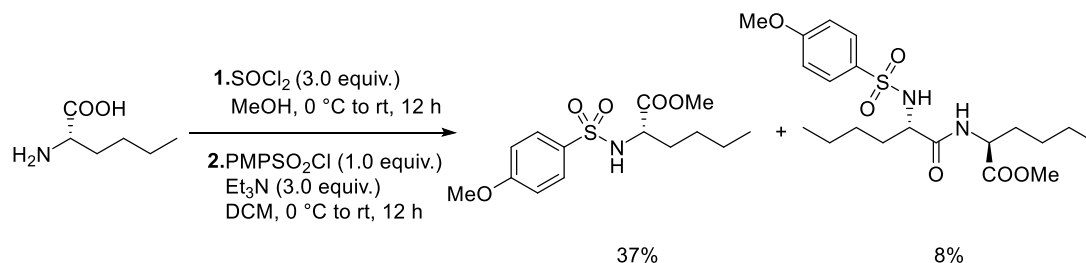

**STEP 1:** L-Norleucine (10 mmol, 1.0 equiv.) was suspended in methanol (100 mL) and cooled at 0 °C. Thionyl chloride (30 mmol, 3.0 equiv.) was added, the mixture was allowed to warm to room temperature and the solution was allowed to stir for 12 hours. The solution was concentrated under reduced pressure to obtain crude amine hydrochloride.

**SETP 2:** The crude amine hydrochloride and  $\text{Et}_3\text{N}$  (30 mmol, 3.0 equiv.) were dissolved in DCM (50 mL) at 0 °C. A DCM solution (20 mL) of sulfonyl chloride (10 mmol, 1.0 equiv.) was added slowly over 5 minutes. After the addition was completed, the mixture was allowed to warm to room temperature and the solution was allowed to stir for 12 hours. The reaction mixture was quenched with water (10 mL) and 1.0 M HCl (10 mL). The aqueous phase was extracted with 20 mL  $\times$  3 DCM. Combined organic phases were dried with anhydrous  $\text{Na}_2\text{SO}_4$ , concentrated under reduced pressure. The crude product was purified by flash chromatography on silica gel (PE/EtOAc = 2.5/1).

#### ethyl 8-((4-methoxyphenyl)sulfonamido)octanoate

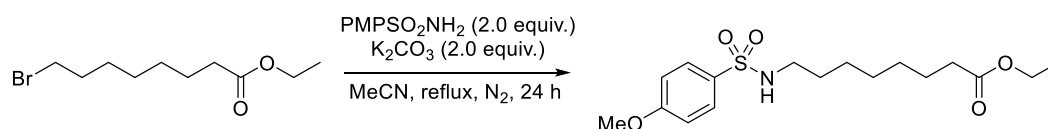

Prepared from ethyl 8-bromooctanoate according to the literature<sup>2</sup> with minor modifications.

Alkyl bromide (2.0 mmol, 1.0 equiv.), *p*-methoxyphenylsulfonamide (4.0 mmol, 2.0 equiv.), and  $\text{K}_2\text{CO}_3$  (4.0 mmol, 2.0 equiv.) were added into a round-bottom flask with 10 mL MeCN. Then the reaction mixture was heated to reflux for 12 hours. After being cooled to room temperature, the reaction mixture was concentrated under reduced pressure, 5 mL EtOAc was added to the residue

and the insoluble material was filtered off. The solution was concentrated under reduced pressure. The product was purified by flash chromatography on silica gel (PE/EtOAc = 5/1) to give the desired product (63% yield).

#### *N*-(6-(1,3-dioxoisindolin-2-yl)hexyl)-4-methoxybenzenesulfonamide

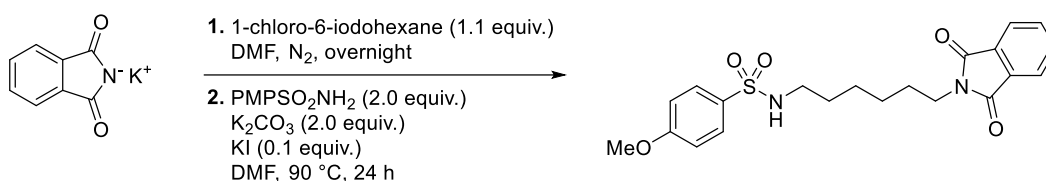

**STEP 1:** In a 25 mL Schlenk flask, potassium phthalimide (5 mmol, 1.0 equiv.) and 1-chloro-6-iodohexane (5.5 mmol, 1.1 equiv.) were dissolved in 10 mL dry DMF under a nitrogen atmosphere. The reaction mixture was stirred overnight at room temperature. The reaction mixture was diluted with 100 mL water and extracted with 10 mL×3 EtOAc. Combined organic phases were washed with saturated salt water and dried with anhydrous Na<sub>2</sub>SO<sub>4</sub>, concentrated under reduced pressure. The crude product was purified by flash chromatography on silica gel (PE/EtOAc=15/1) to give the desired product as a colorless oil (66% yield).

**SETP 2:** Alkyl chloride (2.0 mmol, 1.0 equiv.), *p*-methoxyphenylsulfonamide (4.0 mmol, 2.0 equiv.), K<sub>2</sub>CO<sub>3</sub> (4.0 mmol, 2.0 equiv.), and potassium iodide (4.0 mmol, 2.0 equiv.) were added into a round-bottom flask with 8 mL DMF. Then the reaction mixture was heated to 90 °C for 24 hours. After being cooled to room temperature, the reaction mixture was diluted with 100 mL of water and extracted with 10 mL×3 DCM. Combined organic phases were washed with saturated salt water and dried with anhydrous Na<sub>2</sub>SO<sub>4</sub>, concentrated under reduced pressure. The crude product was purified by flash chromatography on silica gel (PE/EtOAc = 3/1) to give the desired product (77% yield).

#### *N*-(6-chlorohexyl)-4-methoxybenzenesulfonamide

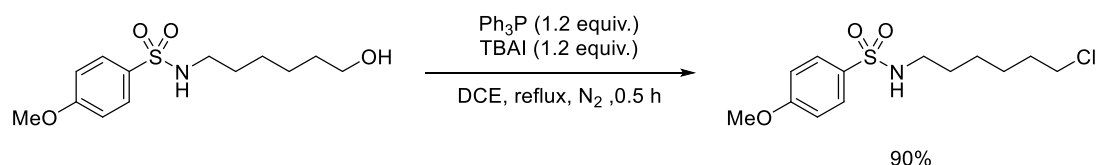

Prepared from *N*-(6-hydroxyhexyl)-4-methoxybenzenesulfonamide according to the literature<sup>3</sup> with minor modifications.

In a 25 mL Schlenk flask, *N*-(6-hydroxyhexyl)-4-methoxybenzenesulfonamide (2.0 mmol, 1.0 equiv.), triphenylphosphine (2.4 mmol, 1.2 equiv.), tetrabutylammonium iodide (2.4 mmol, 1.2 equiv.), and dry 1,2-dichloroethane (20 mL) were added under a N<sub>2</sub> atmosphere. The mixture was heated to reflux for 0.5 hours. After the mixture was cooled to room temperature, the solvent was removed by concentration under reduced pressure. The residue was purified by flash chromatography on silica gel (PE/EtOAc = 3/1) to give the desired product (90% yield).

#### *N*-(6-bromohexyl)-4-methoxybenzenesulfonamide

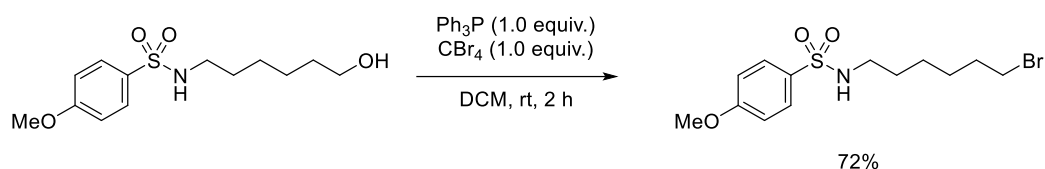

Prepared from *N*-(6-hydroxyhexyl)-4-methoxybenzenesulfonamide according to the literature<sup>3</sup>.

To a solution of *N*-(6-hydroxyhexyl)-4-methoxybenzenesulfonamide (2.0 mmol, 1.0 equiv.) in dry dichloromethane (10 mL) was added CBr<sub>4</sub> (2.0 mmol, 1.0 equiv.), and triphenylphosphine (2.0 mmol, 1.0 equiv.) at 0 °C. The mixture was stirred at room temperature for 2 hours and concentrated under reduced pressure. The residue was purified by flash chromatography on silica gel (PE/EtOAc = 3/1) to give the desired product (72% yield).

#### 6-((4-methoxyphenyl)sulfonamido)hexyl 4-methoxybenzenesulfonate

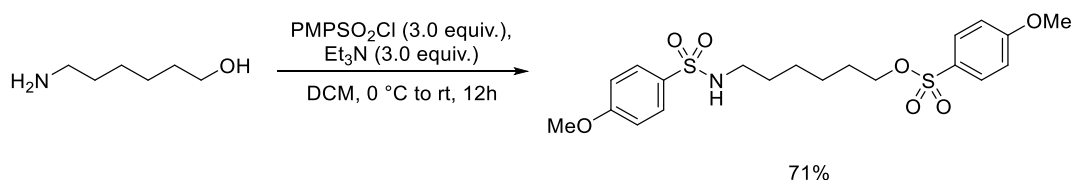

6-aminohexan-1-ol (2.0 mmol, 1.0 equiv.) and Et<sub>3</sub>N (6 mmol, 3.0 equiv.) were dissolved in DCM (10 mL) at 0 °C. A DCM solution (10 mL) of sulfuryl chloride (6 mmol, 6 equiv.) was added slowly over 5 minutes. After the addition was completed, the mixture was allowed to warm to room

temperature and stirred for 12 hours. The reaction mixture was quenched with water (3 mL) and 1.0 M HCl (6 mL). The aqueous phase was extracted with DCM. Combined organic phases were dried with anhydrous Na<sub>2</sub>SO<sub>4</sub> and concentrated under reduced pressure. The crude product was purified by flash chromatography on silica gel (PE/EtOAc = 2/1) to give the desired product (71% yield).

**N-(6-(3-(1,3-dioxoisindolin-2-yl)-2,6-dioxopiperidin-1-yl)-4,4-difluorohexyl)-4-methoxybenzenesulfonamide**

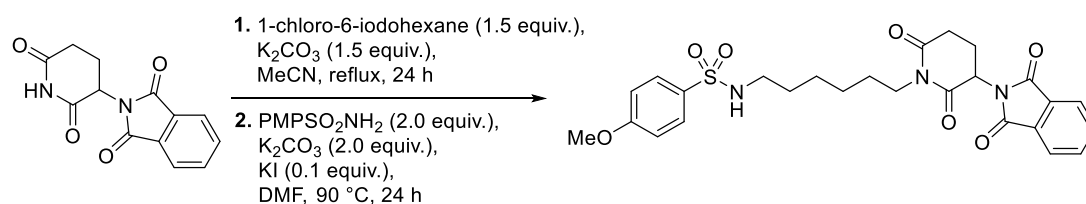

**STEP 1:** Into a 25 mL Schlenk flask were added Thalidomide (3 mmol, 1.0 equiv.), 1-chloro-6-iodohexane (4.5 mmol, 1.5 equiv.), K<sub>2</sub>CO<sub>3</sub> (4.5 mmol, 2.0 equiv.), and 15 mL MeCN. The reaction mixture was heated to reflux for 24 hours. The reaction mixture was concentrated under reduced pressure. The crude product was purified by flash chromatography on silica gel (PE/EtOAc = 5/1) to give the desired product as a colorless oil (88% yield).

**STEP 2:** Alkyl chloride (2.0 mmol, 1.0 equiv.), *p*-methoxyphenylsulfonamide (4.0 mmol, 2.0 equiv.), K<sub>2</sub>CO<sub>3</sub> (4.0 mmol, 2.0 equiv.), and potassium iodide (4.0 mmol, 2.0 equiv.) were added into a round-bottom flask with 8 mL DMF. Then the reaction mixture was heated to 90 °C for 24 hours. After being cooled to room temperature, the reaction mixture was diluted with 100 mL of water and extracted with 10 mL×3 DCM. Combined organic phases were washed with saturated salt water and dried with anhydrous Na<sub>2</sub>SO<sub>4</sub>, concentrated under reduced pressure. The crude product was purified by flash chromatography on silica gel (PE/EtOAc = 1.5/1) to give the desired product (43% yield).

**N-(6-(1,1-dioxido-3-oxobenzo[d]isothiazol-2(3H)-yl)hexyl)-4-methoxybenzenesulfonamide**

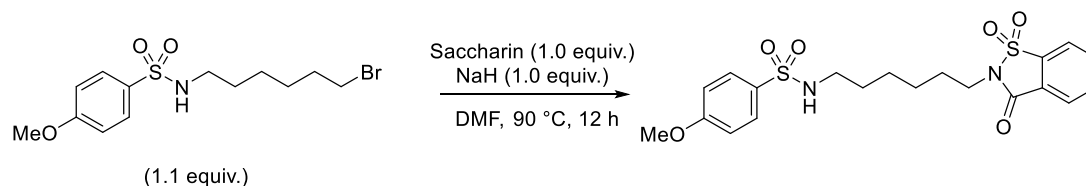



To a solution of Saccharin (1.0 equiv., 5 mmol) in dry DMF at 0 °C was added sodium hydride (1.0 equiv., 60% mineral oil dispersion). The mixture was allowed to warm to room temperature and stirred for 30 minutes. Then, *N*-(6-bromohexyl)-4-methoxybenzenesulfonamide (2.2 mmol, 1.1 equiv.) was added. After that, the mixture was heated at 90 °C for 12 hours. Finally, it was cooled to room temperature, poured into a saturated aqueous ammonium chloride solution and extracted with EtOAc three times. Combined organic phases were washed with saturated salt water and dried with anhydrous Na<sub>2</sub>SO<sub>4</sub>. The organic phase was concentrated and purified by flash chromatography on silica gel (PE/EtOAc = 3/1) to give the desired product (52%).

***N*-(6-((4-methoxyphenyl)sulfonamido)hexyl)-*N*-methyl-4-(5-(*p*-tolyl)-3-(trifluoromethyl)-1*H*-pyrazol-1-yl)benzenesulfonamide**

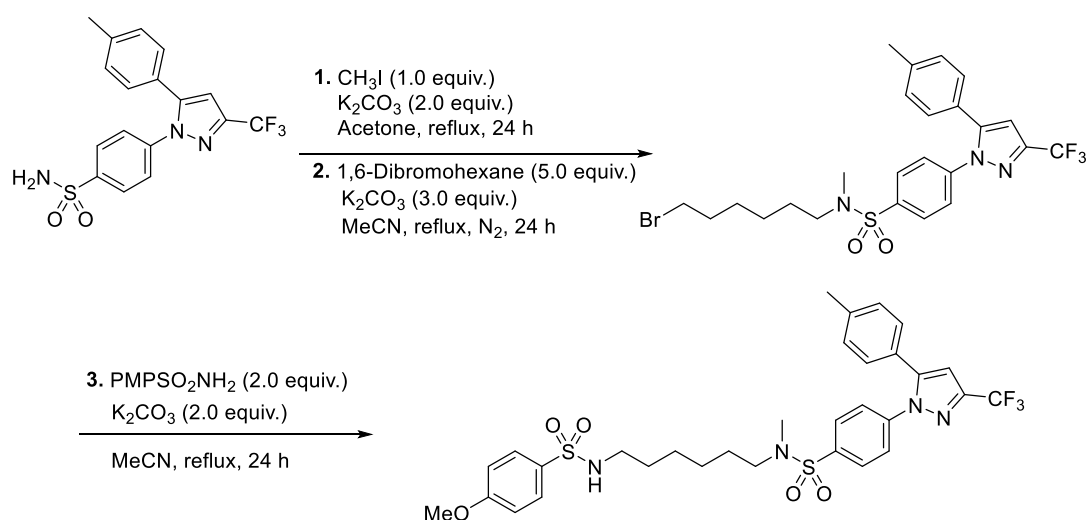

**STEP1:** Under N<sub>2</sub> atmosphere, to a solution of Celecoxib (5.0 mmol, 1.0 equiv.) and CH<sub>3</sub>I (7.5 mmol, 1.5 equiv.) in acetone (25.0 mL) at room temperature was added K<sub>2</sub>CO<sub>3</sub> (10 mmol, 2.0 equiv.). Then it was heated to reflux for 24 hours. After cooling to room temperature, the reaction mixture was filtered through a pad of Celite and concentrated under reduced pressure. The residue was purified by flash chromatography on silica gel (PE/EtOAc = 5/1) to afford *N*-methyl-Celecoxib as a white solid (90% yield).

**STEP2:** Under N<sub>2</sub> atmosphere, to a solution of *N*-methyl-Celecoxib (4.5 mmol, 1.0 equiv.) and 1,6-dibromohexane (22.5 mmol, 5.0 equiv.) in anhydrous CH<sub>3</sub>CN (20 mL) was added K<sub>2</sub>CO<sub>3</sub> (13.5 mmol, 3.0 equiv.) at room temperature. Then the reaction mixture was heated for 24 hours. After

cooling to room temperature, the reaction mixture was filtered through a pad of Celite and concentrated under reduced pressure. The residue was purified by flash chromatography on silica gel (PE/EtOAc = 10/1) to afford the alkyl bromide as a white solid (76 % yield).

**STEP3:** Alkyl bromide (2.0 mmol, 1.0 equiv.), *p*-methoxyphenylsulfonamide (4.0 mmol, 2.0 equiv.), and K<sub>2</sub>CO<sub>3</sub> (4.0 mmol, 2.0 equiv.) were added into a round-bottom flask with 10 mL MeCN. Then the reaction mixture was heated to reflux for 24 hours. After being cooled to room temperature, the reaction mixture was concentrated under reduced pressure, 5 mL EtOAc was added to the residue and the insoluble material was filtered off. The solution was concentrated under reduced pressure. The crude product was purified by flash chromatography on silica gel (PE/EtOAc = 3/1) to give the desired product (46% yield).

#### **N-fluoro-4-methoxy-N-pentylbenzenesulfonamide**

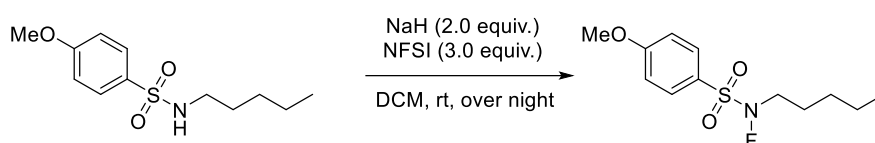

Prepared from 4-methoxy-N-pentylbenzenesulfonamide according to the literature<sup>3</sup>.

In an oven dried round bottom flask with stir bar, sodium hydride (10 mmol, 2.0 equiv.) was taken. The sodium hydride was washed with pentane (2 times) and dried under vacuum and filled with nitrogen. Then dry DCM (40 mL) was added to it. A solution of sulfonamide (1 equiv.) in dry DCM (0.5 M) was added dropwise to the NaH suspension in DCM. The total reaction was stirred at room temperature for 30 min. A solution of NFSI (3.0 equiv.) in dry DCM (0.5 M). was added to dropwise to the reaction mixture at room temperature. The total reaction mixture was stirred for overnight at room temperature. The reaction was quenched with ice with constant stirring. Then 50 mL of water was added to the reaction mixture. The organic part was washed with 30 mL NaHCO<sub>3</sub>, and 30 mL brine solution respectively. The organic part was concentrated under reduced pressure. The crude product was purified by flash chromatography on silica gel (PE/EtOAc = 10/1) to give the desired product (71% yield).

#### 4. UV/Vis Absorption Spectra

The samples were measured in UV quartz cuvettes (chamber volume = 3.5mL, H × W × D=12.4 × 12.4 × 45 mm) fitted with a PTFE stopper in the presence of air.

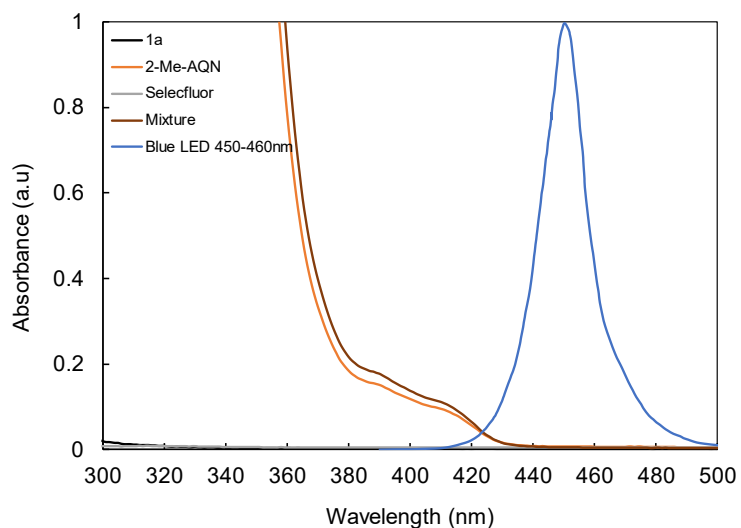

**Figure S4.** The absorption spectra of 1a (1mM in MeCN), 2-Me-AQN (1mM in MeCN), Selectfluor (10 mM in MeCN), the mixture (1a, 10mM in MeCN; Selectfluor, 10mM in MeCN; 2-Me-AQN, 1mM in MeCN) and the emission spectra of 450-460 nm blue LED.

## 5. Stern-Volmer Quenching Experiments

A solution of 2-methylantraquinone in MeCN was excited at 250 nm and the intensity of emission spectrum was measured at 310 nm. For each quenching experiment, the emission intensity of photosensitizer (10  $\mu$ M) with different concentration of quencher (Selectfluor: 0, 1, 2, 3, 4 mM) was collected. ( $I_0$ : without quencher,  $I$ : with quencher)

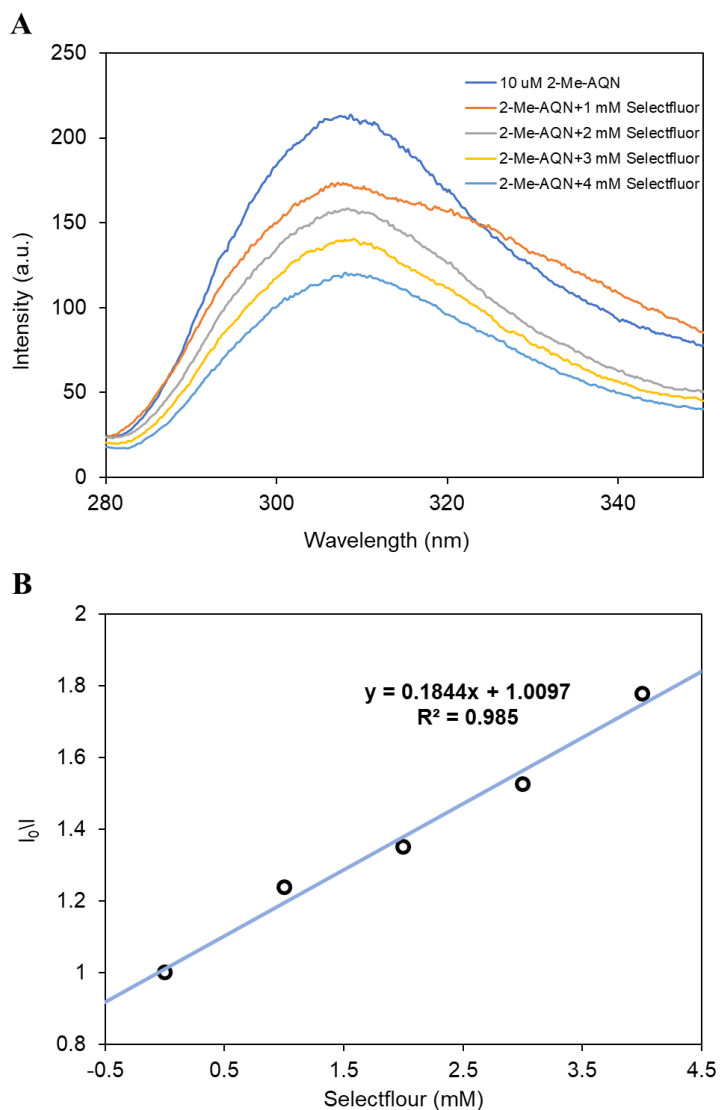

**Figure S5.** A) Emission intensity of 2-methylantraquinone, with varied amount of Selectfluor. B) Stern-Volmer plot of 2-methylantraquinone and Selectfluor.

Based on the above fluorescence quenching experiments, a notable decrease of fluorescence intensity of 2-methylantraquinone was recorded with increasing the concentration of oxidants (Selectfluor), suggesting that the oxidants should participate in energy transfer with the excited state photocatalyst 2-methylantraquinone\* under the standard reaction conditions.

## 6. Quantum Yield Measurements

According to the procedure of Yoon<sup>4</sup>, the photon flux of the LED ( $\lambda_{\text{max}} = 458 \text{ nm}$ ) was determined by standard ferrioxalate actinometry. A 0.15 M solution of ferrioxalate was prepared by dissolving potassium ferrioxalate hydrate (0.737 g) in  $\text{H}_2\text{SO}_4$  (10 mL of 0.05 M solution). A buffered solution of 1,10-phenanthroline was prepared by dissolving 1,10-phenanthroline (5.0 mg) and sodium acetate (1.13 g) in  $\text{H}_2\text{SO}_4$  (5.0 mL of 0.5 M solution). Both solutions were stored in the dark. To determine the photon flux of the LED, the ferrioxalate solution (3.0 mL) was placed in a cuvette and irradiated for 90 seconds at  $\lambda_{\text{max}} = 458 \text{ nm}$ . After irradiation, the phenanthroline solution (0.525 mL) was added to the cuvette and the mixture was allowed to stir in the dark for 1 hour to allow the ferrous ions to completely coordinate to the phenanthroline. The absorbance of the solution was measured at 510 nm. A nonirradiated sample was also prepared and the absorbance at 510 nm was measured. Conversion was calculated using eq 1.

|                    | No-irrad | Irrad |
|--------------------|----------|-------|
| $A_{510\text{nm}}$ | 2.479    | 3.806 |

$$\text{mol Fe}^{2+} = (V \times \Delta A) / (l \times \epsilon) \quad (1)$$

$$\text{mol Fe}^{2+} = [3.525 \times 10^{-3} \text{ L} \times (3.806 - 2.479)] / (1 \text{ cm} \times 11100 \text{ L mol}^{-1} \text{cm}^{-1}) = 4.214 \times 10^{-7}$$

V is the total volume ( $3.525 \times 10^{-3} \text{ L}$ ) of the solution after addition of phenanthroline;  $\Delta A$  is the difference in absorbance at 510 nm between the irradiated and non-irradiated solutions; l is the path length (1.00 cm), and  $\epsilon$  is the molar absorptivity of the ferrioxalate actinometer at 510 nm ( $11100 \text{ L mol}^{-1} \text{cm}^{-1}$ )<sup>5</sup>. The photon flux can be calculated using eq 2.

$$\text{photo flux} = \text{mol Fe}^{2+} / (\Phi \times t \times f) \quad (2)$$

$$\text{photo flux} = 4.214 \times 10^{-7} / (0.845 \times 90 \times 0.9999) = 5.542 \times 10^{-9} \text{ einstein s}^{-1}$$

Where  $\Phi$  is the quantum yield for the ferrioxalate actinometer (0.845 for a 0.15 M solution at  $\lambda = 458 \text{ nm}$ ), t is the time (90 s), and f (0.9999) is the fraction of light absorbed at 458 nm by the ferrioxalate actinometer. This value is calculated using eq 3 where  $A_{458\text{nm}}$  (3.9024) is the absorbance of the ferrioxalate solution at 458 nm. The photon flux was calculated to be  $5.542 \times 10^{-9} \text{ einstein s}^{-1}$ .

<sup>1</sup>.

$$f = 1 - 10^{-A_{458 \text{ nm}}} \quad (3)$$

$$f = 1 - 10^{-3.9024} = 0.9999$$

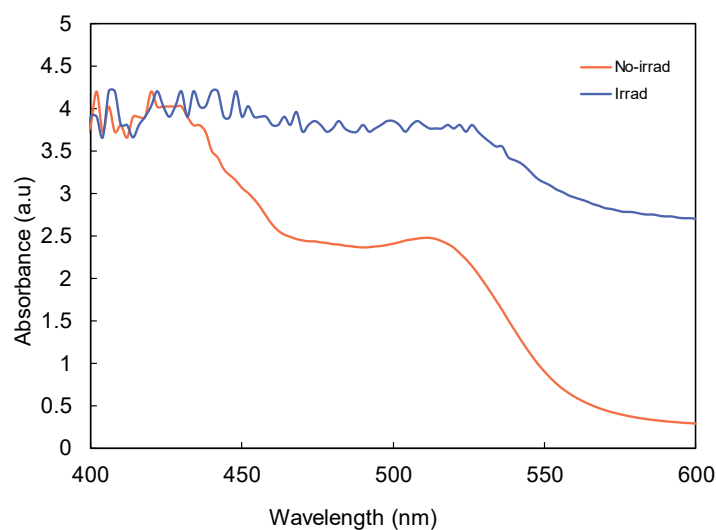

**Figure S6.** Absorption spectra of irradiation experiment and non-irradiation experiment

### Determination of the reaction quantum yield

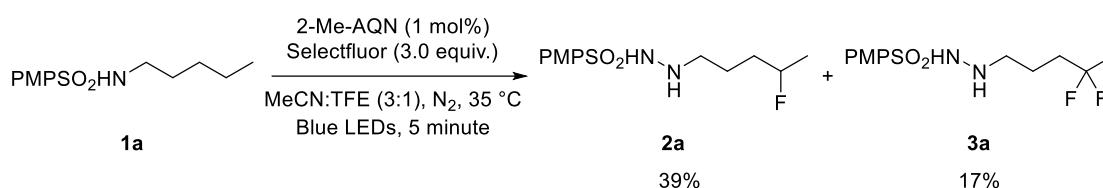

The reaction mixture was stirred and irradiated by blue LED ( $\lambda^{\text{max}} = 458 \text{ nm}$ ) for 300 s. The yield of product was determined by  $^{19}\text{F}$  NMR analysis using trifluorotoluene as an internal standard. The yield of **2a** and **3a** was determined to be 56% ( $1.12 \times 10^{-4} \text{ mol}$  of **2a** and **3a**). The reaction quantum yield ( $\Phi$ ) was determined using eq 4 where the photon flux is  $5.542 \times 10^{-9} \text{ einsteins s}^{-1}$  (determined by actinometry as described above),  $t$  is the reaction time (300 s) and  $f$  is the fraction of incident light absorbed by the catalyst, determined using eq 3.

$$\begin{aligned}
 \text{Quantum Yield } (\Phi) &= \text{moles of product formed} / (\text{flux} \times f \times t) \quad (4) \\
 &= 1.12 \times 10^{-4} / (5.542 \times 10^{-9} \times 0.9999 \times 300) \\
 &= 67.4
 \end{aligned}$$

## 7. Gram-scale Experiment

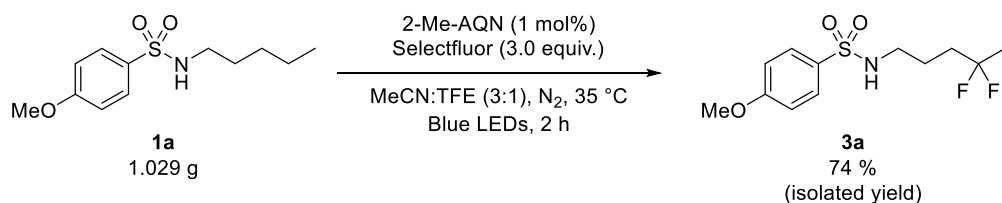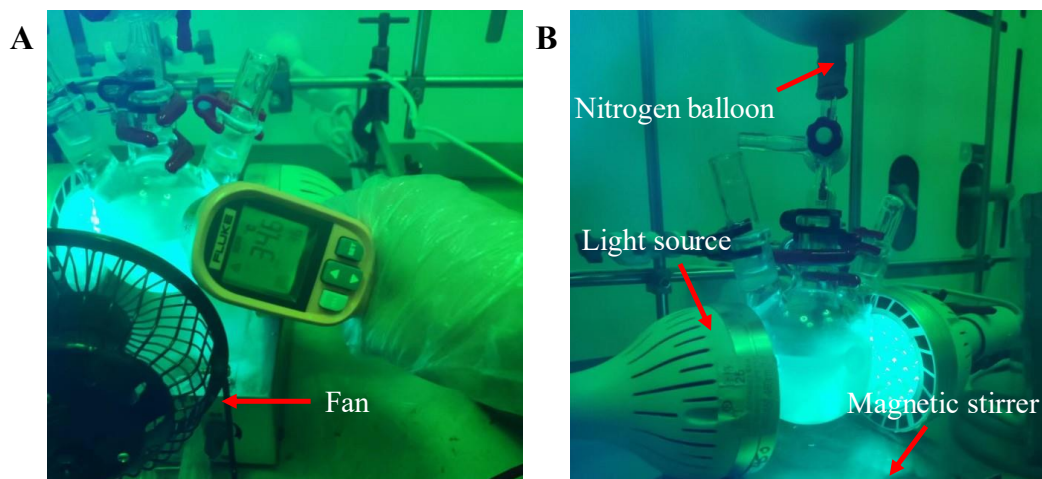

**Figure S7.** A) Fan cooled to 35°C. B) Schematic diagram of the reaction.

(Capture photographs with filters.)

Into a 250 mL three-neck round bottom flask equipped with a nitrogen balloon were added sulfonamide **1a** (1.029 g, 4.0 mmol, 1.0 equiv.), 2-methylantraquinone (9 mg, 0.04 mmol, 0.01 equiv.), Selectfluor (4.251 g, 12.0 mmol, 3.0 equiv.), 80 mL MeCN, and 27 mL TFE. The flask mixture was degassed by ultrasonication for 5 minutes and then evacuated and backfilled with nitrogen three times. The mixture was stirred under blue LED light ( $\lambda = 450\text{--}460\text{ nm}$ ,  $2 \times 25\text{ W}$ ) for 2 hours and then concentrated under reduced pressure. The product was purified by column chromatography (PE/EtOAc = 3/1) on silica to give the product **3a**. Obtained as a white solid (74% yield) as a 1.4:98.6 mixture of mono-/difluorinated product.

## 8. Deprotection and Late-stage Functionalization Experiment

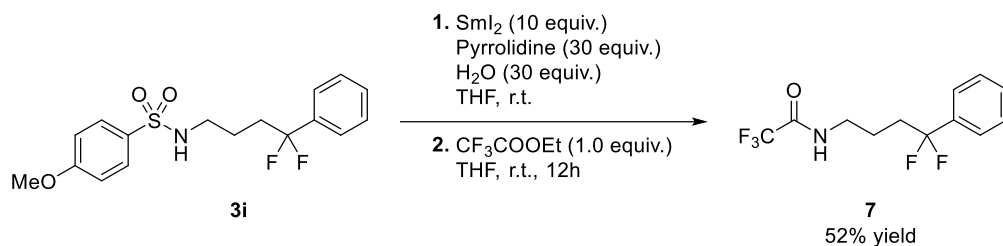

Deprotection experiment according to the literature<sup>6</sup> with minor modifications.

**STEP 1:** To a solution of samarium(II) iodide (2.0 mmol, 10 equiv.) in THF (20 mL, 0.1 M), sulfonamide (0.2 mmol in 1 mL THF, 1.0 equiv.) was added, followed by water (6.0 mmol, 30 equiv.) and pyrrolidine (4.0 mmol, 20 equiv.) under a nitrogen atmosphere. The reaction mixture turned white immediately upon the addition of amine. The resulting mixture was diluted with  $\text{Et}_2\text{O}$  (20 mL) and washed with 15 mL  $\text{K}_2\text{CO}_3$ /tartrate (10% w/v each). The aqueous phase was extracted with 10 mL $\times$ 3 EtOAc. Combined organic phases were washed with saturated salt water and dried with anhydrous  $\text{Na}_2\text{SO}_4$ , concentrated under reduced pressure. The crude product was purified by flash chromatography on silica gel ( $\text{DCM}/\text{MeOH} = 40/1 + 2\% \text{Et}_3\text{N}$ ) and visualized by 254 nm UV light and Ninhydrin stain to give the crude amine.

**STEP 2:** The crude amine from step 1 (1.0 equiv.) was dissolved in THF (0.2 M) at 0 °C, and ethyl trifluoroacetate (1.0 equiv.) was added slowly. After the addition was completed, the mixture was allowed to warm to room temperature and stirred for 12 hours. The solvent was evaporated under reduced pressure and the residue was purified by flash chromatography on silica gel ( $\text{PE}/\text{EtOAc} = 9/1$ ) to give a white solid product (55% yield, two steps).



## 9. Unsuccessful Substrate

### Mixtures of mono- and difluorinated product

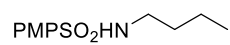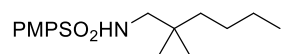

### Mixtures of multiple sites fluorinated product

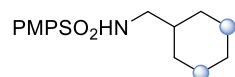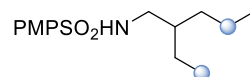

### No reaction

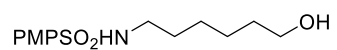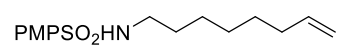

**Scheme 1.** Unsuccessful substrate.

## 10. Mechanistic Investigation

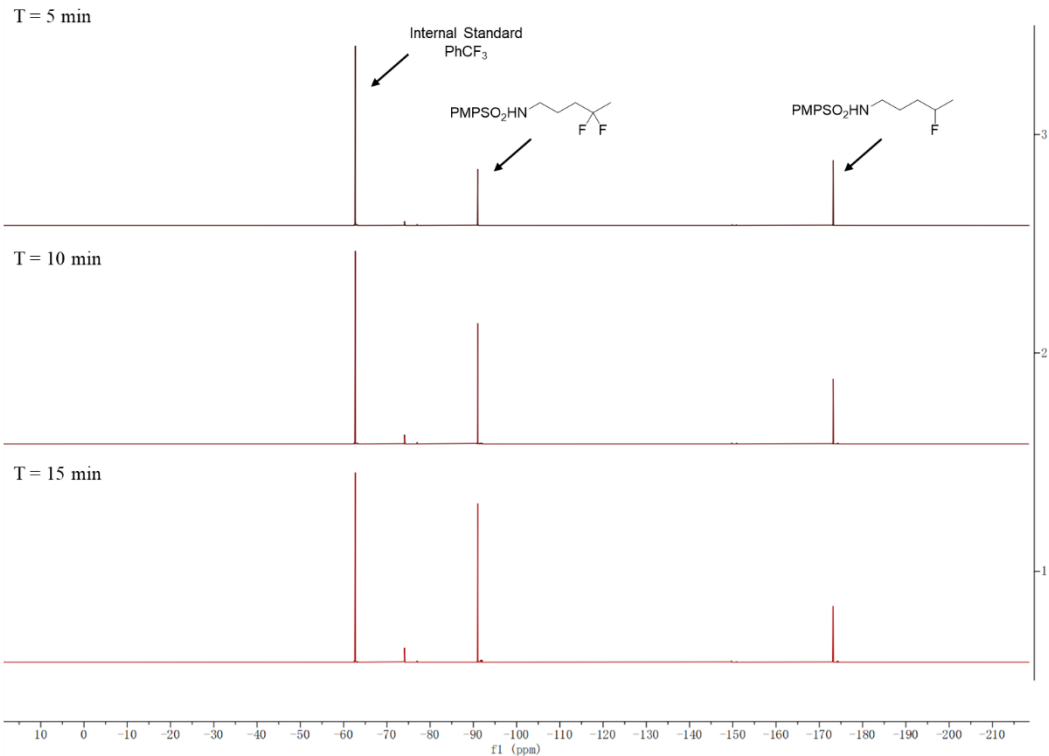

**Figure S8.**  $^{19}\text{F}$  NMR chart of the reaction solution with reaction time of 5, 10, and 15 min.

We followed the reaction by  $^{19}\text{F}$  NMR that showed that the reaction process did not involve the formation of N-F species **6** (-49.78 ppm) under standard condition.

## 11. Characterization Data

### 11.1 Intermediates

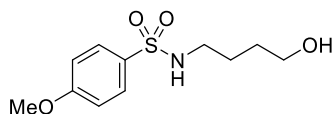

#### M-1

##### N-(4-hydroxybutyl)-4-methoxybenzenesulfonamide

Prepared by **General Procedure A** on a 5 mmol scale, use 5 mmol sulfuryl chloride instead. Obtain a white solid (85% yield).

**<sup>1</sup>H NMR** (400 MHz, DMSO-*d*<sub>6</sub>)  $\delta$  7.71 (d, *J* = 6.4 Hz, 2H), 7.39 (t, *J* = 5.9 Hz, 1H), 7.10 (d, *J* = 8.4 Hz, 2H), 4.37 (td, *J* = 5.1, 2.7 Hz, 1H), 3.82 (s, 3H), 3.38 – 3.30 (m, 2H), 2.77 – 2.61 (m, 2H), 1.48 – 1.28 (m, 4H).

**<sup>13</sup>C NMR** (101 MHz, DMSO-*d*<sub>6</sub>)  $\delta$  162.48, 132.71, 129.07, 114.76, 60.66, 56.07, 42.98, 30.04, 26.20.

Data are consistent with reported in the literature<sup>7</sup>.

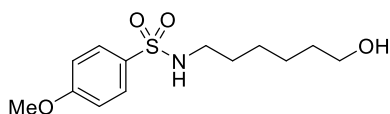

#### M-2

##### N-(6-hydroxyhexyl)-4-methoxybenzenesulfonamide

Prepared by **General Procedure A** on a 10 mmol scale, use 5 mmol sulfuryl chloride instead. Obtain a white solid (92% yield).

**<sup>1</sup>H NMR** (400 MHz, DMSO-*d*<sub>6</sub>)  $\delta$  7.71 (d, *J* = 8.6 Hz, 2H), 7.38 (t, *J* = 5.9 Hz, 1H), 7.10 (d, *J* = 8.4 Hz, 2H), 4.35 – 4.27 (m, 1H), 3.83 (s, 3H), 3.35 – 3.30 (m, 2H), 2.67 (q, *J* = 6.7 Hz, 2H), 1.39 – 1.26 (m, 4H), 1.23 – 1.14 (m, 4H).

**<sup>13</sup>C NMR** (101 MHz, DMSO-*d*<sub>6</sub>)  $\delta$  162.49, 132.77, 129.08, 114.76, 61.07, 56.08, 42.96, 32.85, 29.45, 26.45, 25.52.

Data are consistent with reported in the literature<sup>3</sup>.

## 11.2 Sulfonamides

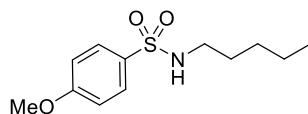

**1a**

### 4-methoxy-N-pentylbenzenesulfonamide

Prepared by **General procedure A** on a 10 mmol scale. Obtain a colorless oil (95% yield).

**<sup>1</sup>H NMR** (400 MHz, CDCl<sub>3</sub>) δ 7.80 (d, *J* = 8.9 Hz, 2H), 6.97 (d, *J* = 8.9 Hz, 2H), 4.54 (brs, 1H), 3.86 (s, 3H), 2.90 (t, *J* = 7.1 Hz, 2H), 1.44 (p, *J* = 6.8 Hz, 2H), 1.30 – 1.16 (m, 4H), 0.83 (t, *J* = 6.3 Hz, 3H).

**<sup>13</sup>C NMR** (101 MHz, CDCl<sub>3</sub>) δ 162.82, 131.61, 129.21, 114.21, 55.61, 43.18, 29.21, 28.67, 22.14, 13.87.

Data are consistent with reported in the literature<sup>8</sup>.

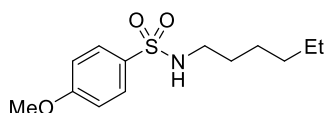

**1b**

### N-hexyl-4-methoxybenzenesulfonamide

Prepared by **General Procedure A** on a 10 mmol scale. Obtain a white solid (96% yield).

**<sup>1</sup>H NMR** (400 MHz, CDCl<sub>3</sub>) δ 7.80 (d, *J* = 8.9 Hz, 2H), 6.97 (d, *J* = 8.9 Hz, 2H), 4.43 (brs, 1H), 3.86 (s, 3H), 2.90 (t, *J* = 7.1 Hz, 2H), 1.49 – 1.38 (m, 2H), 1.31 – 1.13 (m, 6H), 0.83 (t, *J* = 7.0 Hz, 3H).

**<sup>13</sup>C NMR** (101 MHz, CDCl<sub>3</sub>) δ 162.81, 131.66, 129.20, 114.20, 55.59, 43.19, 31.23, 29.49, 26.19, 22.44, 13.91.

**HRMS:** Calcd for C<sub>13</sub>H<sub>22</sub>NO<sub>3</sub>S<sup>+</sup>[M+H]<sup>+</sup>: 272.1315, found: 272.1323

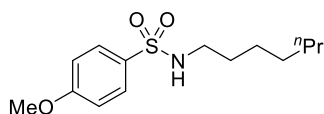

**1c**

### N-heptyl-4-methoxybenzenesulfonamide

Prepared by **General Procedure A** on a 10 mmol scale. Obtain a white solid (93% yield).

**<sup>1</sup>H NMR** (400 MHz, CDCl<sub>3</sub>) δ 7.80 (d, *J* = 8.6 Hz, 2H), 6.97 (d, *J* = 8.6 Hz, 2H), 4.65 – 4.44 (brs, 1H), 3.86 (s, 3H), 2.91 (q, *J* = 7.0, 6.5 Hz, 2H), 1.50 – 1.36 (m, 2H), 1.32 – 1.12 (m, 8H), 0.85 (t, *J* = 6.6 Hz, 3H).

**<sup>13</sup>C NMR** (101 MHz, CDCl<sub>3</sub>) δ 162.82, 131.58, 129.23, 114.21, 55.61, 43.19, 31.63, 29.51, 28.74, 26.49, 22.52, 14.04.

Data are consistent with reported in the literature<sup>9</sup>.

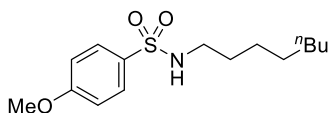

**1d**

**4-methoxy-N-octylbenzenesulfonamide(1c)**

Prepared by **General Procedure A** on a 10 mmol scale. Obtain a white solid (95% yield).

**<sup>1</sup>H NMR** (400 MHz, CDCl<sub>3</sub>) δ 7.80 (d, *J* = 8.9 Hz, 2H), 6.97 (d, *J* = 7.5 Hz, 2H), 4.67 (brs, 1H), 3.86 (s, 3H), 2.90 (t, *J* = 7.2 Hz, 2H), 1.49 – 1.35 (m, 2H), 1.30 – 1.13 (m, 10H), 0.85 (t, *J* = 6.1 Hz, 3H).

**<sup>13</sup>C NMR** (101 MHz, CDCl<sub>3</sub>) δ 162.81, 131.67, 129.20, 114.20, 55.58, 43.18, 31.70, 29.51, 29.07, 29.01, 26.52, 22.58, 14.03.

Data are consistent with reported in the literature<sup>2</sup>.

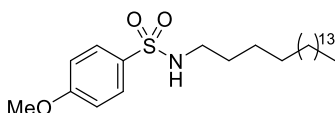

**1e**

**4-methoxy-N-octadecylbenzenesulfonamide**

Prepared by **General Procedure A** on a 5 mmol scale. After preliminary purification by column chromatography, the product was recrystallized in PE/EtOAc to obtain pure product as a white solid (79% yield).

**<sup>1</sup>H NMR** (400 MHz, CDCl<sub>3</sub>) δ 7.80 (d, *J* = 8.9 Hz, 2H), 6.97 (d, *J* = 8.9 Hz, 2H), 4.48 (brs, 1H), 3.86 (s, 3H), 2.91 (t, *J* = 7.1 Hz, 2H), 1.43 (p, *J* = 7.1 Hz, 2H), 1.30 – 1.14 (m, 30H), 0.87 (t, *J* = 6.8 Hz, 3H).

**<sup>13</sup>C NMR** (101 MHz, CDCl<sub>3</sub>) δ 162.81, 131.69, 129.20, 114.20, 55.58, 43.19, 31.92, 29.69, 29.65, 29.61, 29.54, 29.53, 29.44, 29.35, 29.08, 26.54, 22.68, 14.09.

**HRMS**: Calcd for C<sub>25</sub>H<sub>46</sub>NO<sub>3</sub>S<sup>+</sup>[M+H]<sup>+</sup>: 440.3193, found: 440.3174

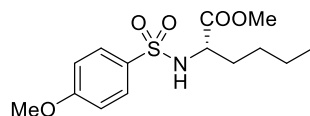

**1f**

**methyl (S)-2-((4-methoxyphenyl)sulfonamido)hexanoate**

Prepared on page S9. Obtain a white solid (37% yield).

**<sup>1</sup>H NMR** (400 MHz, CDCl<sub>3</sub>) δ 7.76 (d, *J* = 8.9 Hz, 2H), 6.95 (d, *J* = 8.9 Hz, 2H), 5.10 (d, *J* = 9.0 Hz, 1H), 3.92 – 3.86 (m, 1H), 3.85 (s, 3H), 3.50 (s, 3H), 1.77 – 1.51 (m, 2H), 1.36 – 1.18 (m, 4H), 0.85 (t, *J* = 7.0 Hz, 3H).

**<sup>13</sup>C NMR** (101 MHz, CDCl<sub>3</sub>) δ 172.41, 163.00, 131.36, 129.42, 114.12, 55.65, 55.62, 52.38, 33.07, 26.99, 22.03, 13.74.

**HRMS:** Calcd for  $C_{14}H_{22}NO_5S^+[M+H]^+$ : 316.1213, found: 316.1208

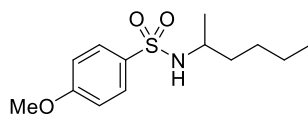

**1g**

**N-(hexan-2-yl)-4-methoxybenzenesulfonamide**

Prepared by **General Procedure A** on a 5 mmol scale. Obtain a white solid (37% yield).

**<sup>1</sup>H NMR** (400 MHz,  $CDCl_3$ )  $\delta$  7.81 (d,  $J$  = 9.0 Hz, 2H), 6.96 (d,  $J$  = 9.0 Hz, 2H), 4.42 (brs, 1H), 3.86 (s, 3H), 3.26 (h,  $J$  = 6.5 Hz, 1H), 1.39 – 1.29 (m, 2H), 1.25 – 1.10 (m, 4H), 1.02 (d,  $J$  = 6.5 Hz, 3H), 0.80 (t,  $J$  = 7.0 Hz, 3H).

**<sup>13</sup>C NMR** (101 MHz,  $CDCl_3$ )  $\delta$  162.73, 133.05, 129.12, 114.12, 55.57, 49.93, 37.17, 27.64, 22.31, 21.71, 13.84.

Data are consistent with reported in the literature<sup>2</sup>.

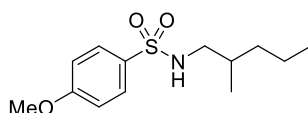

**1h**

**4-methoxy-N-(2-methylpentyl)benzenesulfonamide**

Prepared by **General Procedure A** on a 1 mmol scale. Obtain a light yellow oil (96% yield).

**<sup>1</sup>H NMR** (400 MHz,  $CDCl_3$ )  $\delta$  7.79 (d,  $J$  = 8.9 Hz, 2H), 6.97 (d,  $J$  = 8.9 Hz, 2H), 4.61 (brs, 1H), 3.86 (s, 3H), 2.90 – 2.61 (m, 2H), 1.64 – 1.47 (m, 1H), 1.31 – 0.99 (m, 4H), 0.83 (t,  $J$  = 7.5 Hz, 6H).

**<sup>13</sup>C NMR** (101 MHz,  $CDCl_3$ )  $\delta$  162.79, 131.73, 129.18, 114.19, 55.59, 49.05, 36.22, 32.87, 19.79, 17.42, 14.12.

**HRMS:** Calcd for  $C_{13}H_{22}NO_3S^+[M+H]^+$ : 272.1315, found: 272.1304

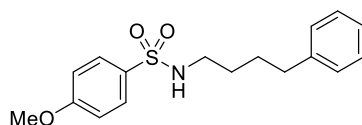

**1i**

**4-methoxy-N-(4-phenylbutyl)benzenesulfonamide**

Prepared by **General Procedure A** on a 5 mmol scale. Obtain a white solid (86% yield).

**<sup>1</sup>H NMR** (400 MHz,  $CDCl_3$ )  $\delta$  7.78 (d,  $J$  = 8.9 Hz, 2H), 7.30 – 7.06 (m, 5H), 6.95 (d,  $J$  = 8.9 Hz, 2H), 4.60 (t,  $J$  = 6.3 Hz, 1H), 3.85 (s, 3H), 2.93 (q,  $J$  = 6.5 Hz, 2H), 2.54 (t,  $J$  = 7.5 Hz, 2H), 1.64 – 1.53 (m, 2H), 1.53 – 1.41 (m, 2H).

**<sup>13</sup>C NMR** (101 MHz,  $CDCl_3$ )  $\delta$  162.84, 141.78, 131.63, 129.19, 128.33, 125.84, 114.24, 55.60,

43.02, 35.24, 29.09, 28.21.

Data are consistent with reported in the literature<sup>10</sup>.

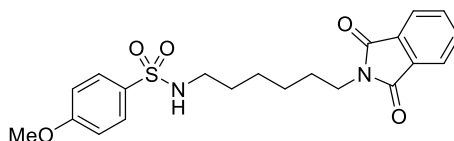

**1j**

**N-(6-(1,3-dioxoisindolin-2-yl)hexyl)-4-methoxybenzenesulfonamide**

Prepared on page S10. Obtain a white solid (77% yield).

**<sup>1</sup>H NMR** (400 MHz, CDCl<sub>3</sub>) δ 7.82 (dd, *J* = 5.5, 3.0 Hz, 2H), 7.78 (d, *J* = 8.9 Hz, 2H), 7.70 (dd, *J* = 5.4, 3.1 Hz, 2H), 6.96 (d, *J* = 8.9 Hz, 2H), 4.57 (brs, 1H), 3.85 (s, 3H), 3.63 (t, *J* = 7.2 Hz, 2H), 2.90 (t, *J* = 6.9 Hz, 2H), 1.61 (p, *J* = 7.3 Hz, 2H), 1.44 (p, *J* = 7.0 Hz, 2H), 1.33 – 1.22 (m, 4H).

**<sup>13</sup>C NMR** (101 MHz, CDCl<sub>3</sub>) δ 168.45, 162.82, 133.91, 132.12, 131.72, 129.20, 123.19, 114.23, 55.59, 42.96, 37.67, 29.36, 28.33, 26.14, 25.92.

**HRMS:** Calcd for C<sub>21</sub>H<sub>25</sub>N<sub>2</sub>O<sub>5</sub>S<sup>+</sup>[M+H]<sup>+</sup>: 417.1479, found: 417.1474

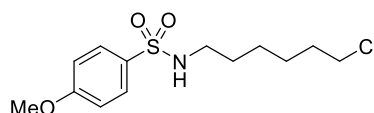

**1k**

**N-(6-chlorohexyl)-4-methoxybenzenesulfonamide**

Prepared on page S10. Obtain a light yellow solid (90% yield).

**<sup>1</sup>H NMR** (400 MHz, CDCl<sub>3</sub>) δ 7.80 (d, *J* = 8.9 Hz, 2H), 6.98 (d, *J* = 8.9 Hz, 2H), 4.55 (brs, 1H), 3.87 (s, 3H), 3.48 (t, *J* = 6.6 Hz, 2H), 2.92 (t, *J* = 6.7 Hz, 2H), 1.70 (p, *J* = 6.7 Hz, 2H), 1.47 (p, *J* = 7.2 Hz, 2H), 1.42 – 1.23 (m, 4H).

**<sup>13</sup>C NMR** (101 MHz, CDCl<sub>3</sub>) δ 162.88, 131.63, 129.20, 114.26, 55.61, 44.83, 42.99, 32.32, 29.38, 26.29, 25.77.

Data are consistent with reported in the literature<sup>3</sup>.

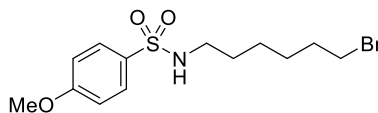

**1l**

**N-(6-bromohexyl)-4-methoxybenzenesulfonamide**

Prepared on page S11. Obtain a light yellow solid (72% yield).

**<sup>1</sup>H NMR** (400 MHz, CDCl<sub>3</sub>) δ 7.80 (d, *J* = 9.0 Hz, 2H), 6.98 (d, *J* = 9.0 Hz, 2H), 4.54 (s, 1H), 3.87 (s, 3H), 3.36 (t, *J* = 6.8 Hz, 2H), 2.92 (q, *J* = 7.5 Hz, 2H), 1.83 – 1.74 (m, 2H), 1.47 (p, *J* = 7.2 Hz, 2H), 1.41 – 1.23 (m, 4H).

$^{13}\text{C}$  NMR (101 MHz,  $\text{CDCl}_3$ )  $\delta$  162.88, 131.63, 129.20, 114.26, 55.62, 42.98, 33.59, 32.48, 29.35, 27.56, 25.64.

Data are consistent with reported in the literature<sup>3</sup>.

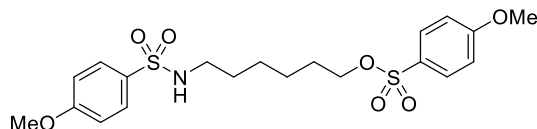

**1m**

**6-((4-methoxyphenyl)sulfonamido)hexyl 4-methoxybenzenesulfonate**

Prepared on page S11. Obtain a white solid (71% yield).

$^1\text{H}$  NMR (400 MHz,  $\text{CDCl}_3$ )  $\delta$  7.82 (d,  $J$  = 9.0 Hz, 2H), 7.78 (d,  $J$  = 8.9 Hz, 2H), 7.00 (d,  $J$  = 9.0 Hz, 2H), 6.97 (d,  $J$  = 8.9 Hz, 2H), 4.54 (brs, 1H), 3.96 (t,  $J$  = 6.4 Hz, 2H), 3.88 (s, 3H), 3.86 (s, 3H), 2.87 (t,  $J$  = 7.0 Hz, 2H), 1.58 (p,  $J$  = 6.5 Hz, 2H), 1.41 (p,  $J$  = 7.1 Hz, 2H), 1.31 – 1.16 (m, 4H).

$^{13}\text{C}$  NMR (101 MHz,  $\text{CDCl}_3$ )  $\delta$  163.75, 162.89, 131.63, 130.03, 129.18, 127.62, 114.45, 114.27, 70.12, 55.71, 55.62, 42.92, 29.33, 28.60, 25.78, 24.85.

HRMS: Calcd for  $\text{C}_{20}\text{H}_{28}\text{NO}_7\text{S}_2^+[\text{M}+\text{H}]^+$ : 458.1302, found: 458.1311

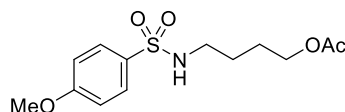

**1n**

**4-((4-methoxyphenyl)sulfonamido)butyl acetate**

Prepared by **General Procedure B** on a 1 mmol scale. Obtain a colorless oil (92% yield).

$^1\text{H}$  NMR (400 MHz,  $\text{CDCl}_3$ )  $\delta$  7.79 (d,  $J$  = 8.9 Hz, 2H), 6.97 (d,  $J$  = 8.9 Hz, 2H), 4.74 (brs, 1H), 3.99 (t,  $J$  = 6.3 Hz, 2H), 3.86 (s, 3H), 2.94 (t,  $J$  = 6.8 Hz, 2H), 2.01 (s, 3H), 1.69 – 1.45 (m, 4H).

$^{13}\text{C}$  NMR (101 MHz,  $\text{CDCl}_3$ )  $\delta$  171.03, 162.89, 131.55, 129.18, 114.27, 63.72, 55.61, 42.73, 26.23, 25.70, 20.88.

HRMS: Calcd for  $\text{C}_{13}\text{H}_{20}\text{NO}_5\text{S}^+[\text{M}+\text{H}]^+$ : 302.1057, found: 302.1064

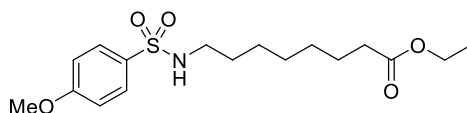

**1o**

**ethyl 8-((4-methoxyphenyl)sulfonamido)octanoate**

Prepared on page S9. Obtain a colorless oil (63% yield).

$^1\text{H}$  NMR (400 MHz,  $\text{CDCl}_3$ )  $\delta$  7.81 (d,  $J$  = 8.2 Hz, 2H), 6.99 (d,  $J$  = 8.2 Hz, 2H), 4.58 (brs, 1H), 4.13 (q,  $J$  = 6.6 Hz, 2H), 3.89 (s, 3H), 2.92 (t,  $J$  = 6.1 Hz, 2H), 2.27 (t,  $J$  = 7.1 Hz, 2H), 1.66 – 1.52



(m, 2H), 1.52 – 1.37 (m, 2H), 1.35 – 1.16 (m, 9H).

$^{13}\text{C}$  NMR (101 MHz,  $\text{CDCl}_3$ )  $\delta$  173.82, 162.82, 131.55, 129.21, 114.22, 60.23, 55.62, 43.12, 34.25, 29.44, 28.88, 28.68, 26.31, 24.77, 14.26.

HRMS: Calcd for  $\text{C}_{17}\text{H}_{28}\text{NO}_5\text{S}^+[\text{M}+\text{H}]^+$ : 358.1683, found: 358.1690

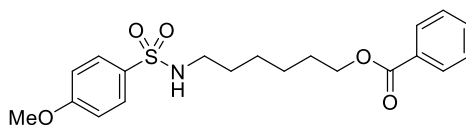

### 1p

#### 6-((4-methoxyphenyl)sulfonamido)hexyl benzoate

Prepared by **General Procedure B** on a 1 mmol scale. Obtain a colorless oil (86% yield).

$^1\text{H}$  NMR (400 MHz,  $\text{CDCl}_3$ )  $\delta$  8.02 (d,  $J = 7.0$  Hz, 2H), 7.79 (d,  $J = 8.9$  Hz, 2H), 7.58 – 7.51 (m, 1H), 7.43 (t,  $J = 7.7$  Hz, 2H), 6.96 (d,  $J = 8.9$  Hz, 2H), 4.67 (brs, 1H), 4.27 (t,  $J = 6.6$  Hz, 2H), 3.85 (s, 3H), 2.92 (t,  $J = 7.0$  Hz, 2H), 1.77 – 1.64 (m, 2H), 1.48 (p,  $J = 7.1$  Hz, 2H), 1.41 – 1.28 (m, 4H).

$^{13}\text{C}$  NMR (101 MHz,  $\text{CDCl}_3$ )  $\delta$  166.65, 162.84, 132.86, 131.65, 130.41, 129.52, 129.19, 128.34, 114.23, 64.77, 55.59, 43.04, 29.45, 28.55, 26.17, 25.52.

HRMS: Calcd for  $\text{C}_{20}\text{H}_{26}\text{NO}_5\text{S}^+[\text{M}+\text{H}]^+$ : 392.1526, found: 392.1549

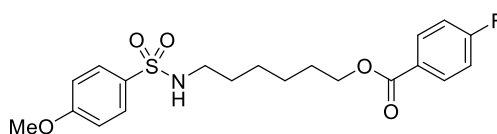

### 1q

#### 6-((4-methoxyphenyl)sulfonamido)hexyl 4-fluorobenzoate

Prepared by **General Procedure B** on a 2 mmol scale. Obtain a colorless oil (97% yield).

$^1\text{H}$  NMR (400 MHz,  $\text{CDCl}_3$ )  $\delta$  8.03 (dd,  $J = 8.9, 5.5$  Hz, 2H), 7.79 (d,  $J = 8.9$  Hz, 2H), 7.10 (t,  $J = 8.7$  Hz, 2H), 6.96 (d,  $J = 8.9$  Hz, 2H), 4.59 (brs, 1H), 4.26 (t,  $J = 6.6$  Hz, 2H), 3.85 (s, 3H), 2.93 (t,  $J = 7.0$  Hz, 2H), 1.70 (p,  $J = 6.6$  Hz, 2H), 1.49 (p,  $J = 7.1$  Hz, 2H), 1.42 – 1.29 (m, 4H).

$^{13}\text{C}$  NMR (101 MHz,  $\text{CDCl}_3$ )  $\delta$  165.74 (d,  $J = 253.8$  Hz), 165.68, 162.87, 132.06 (d,  $J = 9.3$  Hz), 131.66, 129.19, 126.66 (d,  $J = 3.0$  Hz), 115.48 (d,  $J = 22.0$  Hz), 114.24, 64.90, 55.59, 43.02, 29.47, 28.54, 26.15, 25.50.

$^{19}\text{F}$  NMR (376 MHz,  $\text{CDCl}_3$ )  $\delta$  -105.89.

HRMS: Calcd for  $\text{C}_{20}\text{H}_{25}\text{FNO}_5\text{S}^+[\text{M}+\text{H}]^+$ : 410.1432, found: 410.1414

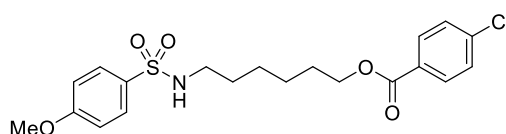

**1r****6-((4-methoxyphenyl)sulfonamido)hexyl 4-chlorobenzoate**

Prepared by **General Procedure B** on a 2 mmol scale. Obtain a white solid (87% yield).

**<sup>1</sup>H NMR** (400 MHz, CDCl<sub>3</sub>) δ 7.95 (d, *J* = 8.5 Hz, 2H), 7.79 (d, *J* = 9.0 Hz, 2H), 7.41 (d, *J* = 8.5 Hz, 2H), 6.97 (d, *J* = 8.9 Hz, 2H), 4.43 (brs, 1H), 4.27 (t, *J* = 6.6 Hz, 2H), 3.86 (s, 3H), 2.94 (q, *J* = 6.5 Hz, 2H), 1.71 (p, *J* = 6.6 Hz, 2H), 1.49 (p, *J* = 7.0 Hz, 2H), 1.42 – 1.29 (m, 4H).

**<sup>13</sup>C NMR** (101 MHz, CDCl<sub>3</sub>) δ 165.76, 162.87, 139.32, 131.70, 130.93, 129.19, 128.88, 128.70, 114.24, 65.01, 55.59, 43.01, 29.47, 28.52, 26.14, 25.49.

**HRMS:** Calcd for C<sub>20</sub>H<sub>25</sub>ClNO<sub>5</sub>S<sup>+</sup>[M+H]<sup>+</sup>: 426.1136, found: 426.1131

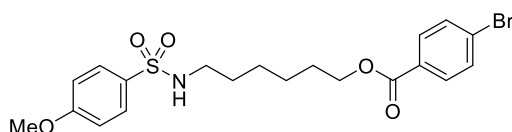**1s****6-((4-methoxyphenyl)sulfonamido)hexyl 4-bromobenzoate**

Prepared by **General Procedure B** on a 2 mmol scale. Obtain a white solid (87% yield).

**<sup>1</sup>H NMR** (400 MHz, CDCl<sub>3</sub>) δ 7.87 (d, *J* = 8.5 Hz, 2H), 7.79 (d, *J* = 8.9 Hz, 2H), 7.57 (d, *J* = 8.5 Hz, 2H), 6.96 (d, *J* = 8.8 Hz, 2H), 4.62 (brs, 1H), 4.26 (t, *J* = 6.6 Hz, 2H), 3.85 (s, 3H), 2.92 (t, *J* = 6.8 Hz, 2H), 1.70 (p, *J* = 6.4 Hz, 2H), 1.49 (p, *J* = 6.9 Hz, 2H), 1.43 – 1.28 (m, 4H).

**<sup>13</sup>C NMR** (101 MHz, CDCl<sub>3</sub>) δ 165.91, 162.86, 131.70, 131.66, 131.08, 129.32, 129.19, 127.96, 114.24, 65.06, 55.60, 43.00, 29.43, 28.50, 26.14, 25.48.

**HRMS:** Calcd for C<sub>20</sub>H<sub>25</sub>BrNO<sub>5</sub>S<sup>+</sup>[M+H]<sup>+</sup>: 470.0631, found: 470.0644

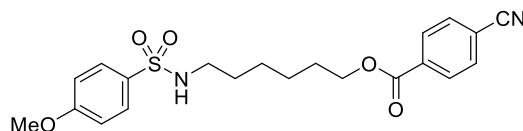**1t****6-((4-methoxyphenyl)sulfonamido)hexyl 4-cyanobenzoate**

Prepared by **General Procedure B** on a 2 mmol scale. Obtain a white solid (87% yield).

**<sup>1</sup>H NMR** (400 MHz, CDCl<sub>3</sub>) δ 8.12 (d, *J* = 8.2 Hz, 2H), 7.79 (d, *J* = 8.9 Hz, 2H), 7.74 (d, *J* = 8.2 Hz, 2H), 6.97 (d, *J* = 8.9 Hz, 2H), 4.58 (s, 1H), 4.31 (t, *J* = 6.6 Hz, 2H), 3.86 (s, 3H), 2.93 (t, *J* = 6.9 Hz, 2H), 1.72 (p, *J* = 6.7 Hz, 2H), 1.49 (p, *J* = 7.0 Hz, 2H), 1.42 – 1.30 (m, 4H).

**<sup>13</sup>C NMR** (101 MHz, CDCl<sub>3</sub>) δ 164.98, 162.88, 134.22, 132.22, 131.64, 130.07, 129.18, 117.98, 116.35, 114.25, 65.60, 55.61, 42.98, 29.46, 28.45, 26.12, 25.46.

**HRMS:** Calcd for C<sub>21</sub>H<sub>25</sub>N<sub>2</sub>O<sub>5</sub>S<sup>+</sup>[M+H]<sup>+</sup>: 417.1479, found: 417.1459

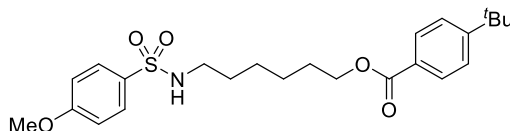

**1u**

**6-((4-methoxyphenyl)sulfonamido)hexyl 4-(tert-butyl)benzoate**

Prepared by **General Procedure B** on a 2 mmol scale. Obtain a colorless oil (86% yield).

**<sup>1</sup>H NMR** (400 MHz, CDCl<sub>3</sub>) δ 7.95 (d, *J* = 8.6 Hz, 2H), 7.80 (d, *J* = 8.9 Hz, 2H), 7.45 (d, *J* = 8.6 Hz, 2H), 6.96 (d, *J* = 8.9 Hz, 2H), 4.56 (brs, 1H), 4.26 (t, *J* = 6.6 Hz, 2H), 3.85 (s, 3H), 2.93 (t, *J* = 7.0 Hz, 2H), 1.70 (p, *J* = 6.6 Hz, 2H), 1.48 (p, *J* = 7.1 Hz, 2H), 1.41 – 1.28 (m, 13H).

**<sup>13</sup>C NMR** (101 MHz, CDCl<sub>3</sub>) δ 166.69, 162.86, 156.54, 131.71, 129.40, 129.20, 127.65, 125.32, 114.24, 64.51, 55.58, 43.04, 35.06, 31.12, 29.49, 28.60, 26.16, 25.52.

**HRMS:** Calcd for C<sub>24</sub>H<sub>34</sub>NO<sub>5</sub>S<sup>+</sup>[M+H]<sup>+</sup>: 448.2152, found: 448.2150

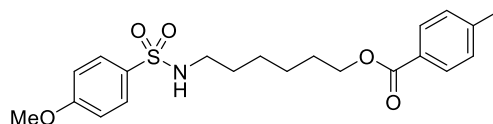

**1v**

**6-((4-methoxyphenyl)sulfonamido)hexyl 4-methylbenzoate**

Prepared by **General Procedure B** on a 2 mmol scale. Obtain a white solid (82% yield).

**<sup>1</sup>H NMR** (400 MHz, CDCl<sub>3</sub>) δ 7.91 (d, *J* = 5.8 Hz, 2H), 7.79 (d, *J* = 9.0 Hz, 2H), 7.23 (d, *J* = 6.6 Hz, 2H), 6.97 (d, *J* = 7.7 Hz, 2H), 4.63 (brs, 1H), 4.30 – 4.17 (m, 2H), 3.86 (s, 3H), 2.99 – 2.85 (m, 2H), 2.41 (s, 3H), 1.77 – 1.60 (m, 2H), 1.55 – 1.43 (m, 2H), 1.41 – 1.27 (m, 4H).

**<sup>13</sup>C NMR** (101 MHz, CDCl<sub>3</sub>) δ 166.74, 162.85, 143.51, 131.69, 129.56, 129.20, 129.06, 127.70, 114.24, 64.57, 55.58, 43.04, 29.46, 28.57, 26.17, 25.52, 21.61.

**HRMS:** Calcd for C<sub>21</sub>H<sub>28</sub>NO<sub>5</sub>S<sup>+</sup>[M+H]<sup>+</sup>: 406.1683, found: 406.1691

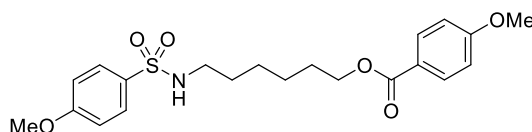

**1w**

**6-((4-methoxyphenyl)sulfonamido)hexyl 4-methoxybenzoate**

Prepared by **General Procedure B** on a 2 mmol scale. Obtain a colorless oil (78% yield).

**<sup>1</sup>H NMR** (400 MHz, CDCl<sub>3</sub>) δ 7.97 (d, *J* = 8.2 Hz, 2H), 7.79 (d, *J* = 8.8 Hz, 2H), 6.96 (d, *J* = 9.0 Hz, 2H), 6.91 (d, *J* = 9.1 Hz, 2H), 4.58 (s, 1H), 4.23 (t, *J* = 6.6 Hz, 2H), 3.85 (s, 6H), 2.92 (t, *J* = 7.2 Hz, 2H), 1.73 – 1.64 (m, 2H), 1.52 – 1.43 (m, 2H), 1.42 – 1.27 (m, 4H).

**<sup>13</sup>C NMR** (101 MHz, CDCl<sub>3</sub>) δ 166.42, 163.35, 162.85, 131.70, 131.53, 129.19, 122.86, 114.23, 113.62, 64.45, 55.58, 55.42, 43.04, 29.46, 28.60, 26.17, 25.53.

**HRMS:** Calcd for  $C_{21}H_{28}NO_6S^+[M+H]^+$ : 422.1632, found: 422.1645

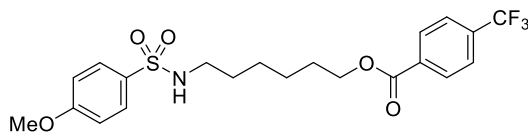

**1x**

**6-((4-methoxyphenyl)sulfonamido)hexyl 4-(trifluoromethyl)benzoate**

Prepared by **General Procedure B** on a 2 mmol scale. Obtain a white solid (91% yield).

**<sup>1</sup>H NMR** (400 MHz,  $CDCl_3$ )  $\delta$  8.13 (d,  $J$  = 8.1 Hz, 2H), 7.79 (d,  $J$  = 8.9 Hz, 2H), 7.70 (d,  $J$  = 8.2 Hz, 2H), 6.97 (d,  $J$  = 8.9 Hz, 2H), 4.54 (brs, 1H), 4.31 (t,  $J$  = 6.6 Hz, 2H), 3.85 (d,  $J$  = 1.7 Hz, 3H), 2.93 (t,  $J$  = 6.8 Hz, 2H), 1.73 (p,  $J$  = 6.7 Hz, 2H), 1.50 (p,  $J$  = 7.0 Hz, 2H), 1.45 – 1.30 (m, 4H).

**<sup>13</sup>C NMR** (101 MHz,  $CDCl_3$ )  $\delta$  165.41, 162.88, 134.40 (q,  $J$  = 32.6 Hz), 133.63, 131.66, 129.94, 129.19, 125.39 (q,  $J$  = 3.7 Hz), 123.65 (q,  $J$  = 272.7 Hz), 114.24, 65.34, 55.58, 42.99, 29.46, 28.48, 26.13, 25.47.

**<sup>19</sup>F NMR** (376 MHz,  $CDCl_3$ )  $\delta$  -63.11.

**HRMS:** Calcd for  $C_{21}H_{25}F_3NO_5S^+[M+H]^+$ : 460.1400, found: 460.1418

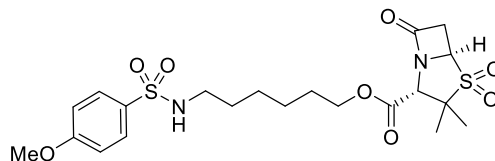

**1y**

**6-((4-methoxyphenyl)sulfonamido)hexyl (2S,5R)-3,3-dimethyl-7-oxo-4-thia-1-azabicyclo[3.2.0]heptane-2-carboxylate 4,4-dioxide**

Prepared by **General Procedure C** on a 1 mmol scale. Obtain a white solid (85% yield).

**<sup>1</sup>H NMR** (400 MHz,  $CDCl_3$ )  $\delta$  7.78 (d,  $J$  = 8.9 Hz, 2H), 6.97 (d,  $J$  = 8.9 Hz, 2H), 4.63 (brs, 1H), 4.63 – 4.60 (m, 1H), 4.36 (s, 1H), 4.19 – 4.14 (m, 2H), 3.86 (s, 3H), 3.53 – 3.38 (m, 2H), 2.90 (t,  $J$  = 6.5 Hz, 2H), 1.67 – 1.60 (m, 2H), 1.59 (s, 3H), 1.51 – 1.43 (m, 2H), 1.40 (s, 3H), 1.35 – 1.29 (m, 4H).

**<sup>13</sup>C NMR** (101 MHz,  $CDCl_3$ )  $\delta$  170.92, 167.05, 162.90, 131.51, 129.20, 114.28, 66.35, 63.29, 62.74, 61.16, 55.65, 42.91, 38.35, 29.37, 28.27, 26.00, 25.36, 20.34, 18.65.

**HRMS:** Calcd for  $C_{21}H_{31}N_2O_8S_2^+[M+H]^+$ : 503.1516, found: 503.1525

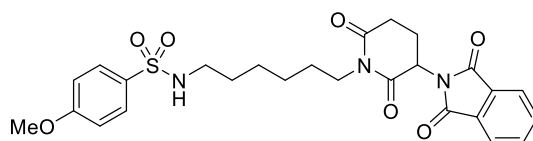

1z

**N-(6-(3-(1,3-dioxoisindolin-2-yl)-2,6-dioxopiperidin-1-yl)hexyl)-4-methoxybenzenesulfonamide**

Prepared on page S12. Obtain a white solid (43% yield).

**<sup>1</sup>H NMR** (400 MHz, CDCl<sub>3</sub>) δ 7.94 – 7.84 (m, 2H), 7.82 – 7.70 (m, 4H), 6.95 (d, *J* = 7.8 Hz, 2H), 5.04 – 4.91 (m, 1H), 4.59 (brs, 1H), 3.85 (s, 3H), 3.81 – 3.69 (m, 2H), 3.00 – 2.85 (m, 3H), 2.82 – 2.66 (m, 2H), 2.16 – 2.05 (m, 1H), 1.57 – 1.35 (m, 4H), 1.30 – 1.19 (m, 4H).

**<sup>13</sup>C NMR** (101 MHz, CDCl<sub>3</sub>) δ 170.95, 168.56, 167.49, 162.77, 134.48, 131.75, 131.71, 129.20, 123.79, 114.21, 55.60, 50.15, 42.92, 40.35, 31.99, 29.20, 27.46, 25.99, 25.94, 22.02.

**HRMS:** Calcd for C<sub>26</sub>H<sub>30</sub>N<sub>3</sub>O<sub>7</sub>S<sup>+</sup>[M+H]<sup>+</sup>: 528.1799, found: 528.1792

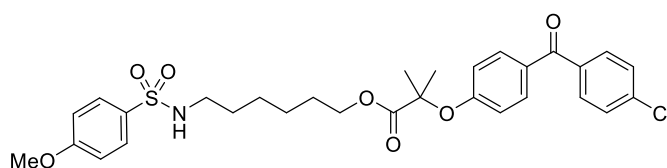

1aa

**6-((4-methoxyphenyl)sulfonamido)hexyl 2-(4-(4-chlorobenzoyl)phenoxy)-2-methylpropanoate**

Prepared by **General Procedure C** on a 1 mmol scale. Obtain a colorless oil (82% yield).

**<sup>1</sup>H NMR** (400 MHz, CDCl<sub>3</sub>) δ 7.80 (d, *J* = 9.0 Hz, 2H), 7.69 (d, *J* = 8.3 Hz, 4H), 7.44 (d, *J* = 8.6 Hz, 2H), 6.97 (d, *J* = 9.0 Hz, 2H), 6.84 (d, *J* = 8.9 Hz, 2H), 4.71 (t, *J* = 5.0 Hz, 1H), 4.11 (t, *J* = 6.4 Hz, 2H), 3.86 (s, 3H), 2.83 (q, *J* = 6.7 Hz, 2H), 1.67 (s, 6H), 1.57 – 1.44 (m, 2H), 1.34 – 1.27 (m, 2H), 1.19 – 1.13 (m, 2H), 1.11 – 1.02 (m, 2z)

**<sup>13</sup>C NMR** (101 MHz, CDCl<sub>3</sub>) δ 194.53, 173.74, 162.79, 159.80, 138.60, 136.19, 132.02, 131.69, 131.29, 130.27, 129.21, 128.61, 116.96, 114.20, 79.43, 65.52, 55.61, 43.07, 29.48, 28.22, 26.05, 25.46, 25.34.

**HRMS:** Calcd for C<sub>30</sub>H<sub>35</sub>ClNO<sub>7</sub>S<sup>+</sup>[M+H]<sup>+</sup>: 588.1817, found: 528.1839

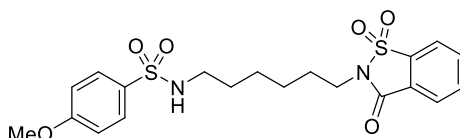

1ab

**N-(6-(1,1-dioxido-3-oxobenzodisothiazol-2(3H)-yl)hexyl)-4-methoxybenzenesulfonamide**

Prepared on page S12. Obtain a white solid (52% yield).

**<sup>1</sup>H NMR** (400 MHz, CDCl<sub>3</sub>) δ 8.06 – 8.02 (m, 1H), 7.93 – 7.81 (m, 3H), 7.78 (d, *J* = 8.9 Hz, 2H), 6.96 (d, *J* = 8.9 Hz, 2H), 4.62 (t, *J* = 6.2 Hz, 1H), 3.85 (s, 3H), 3.72 (t, *J* = 7.4 Hz, 2H), 2.91 (q, *J* = 6.7 Hz, 2H), 1.83 – 1.73 (m, 2H), 1.51 – 1.41 (m, 2H), 1.36 – 1.29 (m, 4H).

**<sup>13</sup>C NMR** (101 MHz, CDCl<sub>3</sub>) δ 162.82, 159.03, 137.62, 134.78, 134.39, 131.57, 129.22, 127.36,

125.18, 120.93, 114.25, 55.62, 42.96, 39.13, 29.29, 28.15, 26.08, 25.85.

**HRMS:** Calcd for  $C_{20}H_{25}N_2O_6S_2^+[M+H]^+$ : 453.1149, found: 453.1132

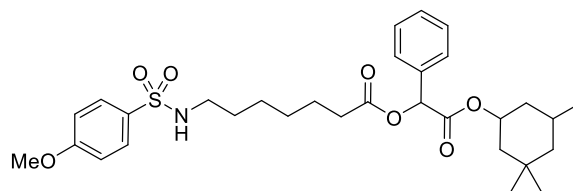

**1ac**

**2-oxo-1-phenyl-2-((3,3,5-trimethylcyclohexyl)oxy)ethyl 7-((4-methoxyphenyl)sulfonamido)heptanoate**

Prepared by **General Procedure D** on a 2 mmol scale. Obtain a white solid (89% yield).

**$^1H$  NMR** (400 MHz,  $CDCl_3$ )  $\delta$  7.81 (d,  $J$  = 8.9 Hz, 2H), 7.50 – 7.44 (m, 2H), 7.44 – 7.36 (m, 3H), 6.99 (d,  $J$  = 8.9 Hz, 2H), 5.87 (d, 1H), 4.93 (tt,  $J$  = 11.6, 4.4 Hz, 1H), 4.57 (s, 1H), 3.88 (s, 3H), 2.93 (q,  $J$  = 6.5 Hz, 2H), 2.52 – 2.33 (m, 2H), 1.92 (dd,  $J$  = 84.0, 12.1 Hz, 1H), 1.76 – 1.42 (m, 6H), 1.36 – 1.27 (m, 5H), 1.07 (dt,  $J$  = 61.7, 12.1 Hz, 1H), 0.95 – 0.66 (m, 11H).

**$^{13}C$  NMR** (101 MHz,  $CDCl_3$ )  $\delta$  173.01, 168.48, 168.46, 162.81, 134.05, 134.04, 131.61, 129.21, 129.09, 128.73, 127.53, 127.51, 114.23, 74.64, 74.62, 72.81, 55.61, 47.42, 43.63, 43.34, 43.03, 40.09, 39.76, 33.77, 32.96, 32.93, 32.29, 32.24, 29.30, 28.40, 27.04, 26.97, 26.10, 25.45, 25.42, 24.55, 22.23, 22.20.

**HRMS:** Calcd for  $C_{31}H_{44}NO_7S^+[M+H]^+$ : 574.2833, found: 574.2838

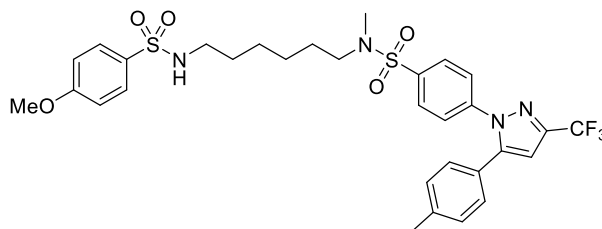

**1ad**

**N-(6-((4-methoxyphenyl)sulfonamido)hexyl)-N-methyl-4-(5-(*p*-tolyl)-3-(trifluoromethyl)-1*H*-pyrazol-1-yl)benzenesulfonamide**

Prepared on page S13. Obtain a colorless oil (45% yield).

**$^1H$  NMR** (400 MHz,  $CDCl_3$ )  $\delta$  7.77 (dd,  $J$  = 14.5, 8.8 Hz, 4H), 7.47 (d,  $J$  = 8.6 Hz, 2H), 7.16 (d,  $J$  = 8.0 Hz, 2H), 7.09 (d,  $J$  = 8.1 Hz, 2H), 6.97 (d,  $J$  = 8.9 Hz, 2H), 6.74 (s, 1H), 4.75 – 4.67 (m, 1H), 3.85 (s, 3H), 2.98 – 2.85 (m, 4H), 2.68 (s, 3H), 2.36 (s, 3H), 1.52 – 1.39 (m, 4H), 1.33 – 1.21 (m, 4H).

**$^{13}C$  NMR** (101 MHz,  $CDCl_3$ )  $\delta$  162.82, 145.32, 144.08 (q,  $J$  = 38.5 Hz), 142.44, 139.83, 137.16, 131.63, 129.75, 129.19, 128.71, 128.30, 125.62, 121.08 (q,  $J$  = 269.4 Hz), 114.25, 106.21 (d,  $J$  = 1.7 Hz), 106.21, 55.62, 49.79, 42.88, 34.51, 29.36, 27.20, 25.80, 25.61, 21.31.

**$^{19}F$  NMR** (376 MHz,  $CDCl_3$ )  $\delta$  -62.39.

**HRMS:** Calcd for  $C_{31}H_{36}F_3N_4O_5S_2^+[M+H]^+$ : 665.2074, found: 665.2077

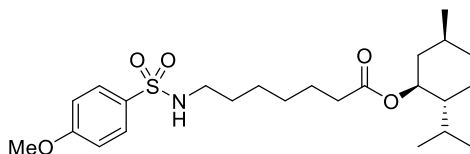

**1ae**

**(1S,2R,5S)-2-isopropyl-5-methylcyclohexyl 7-((4-methoxyphenyl)sulfonamido)heptanoate**

Prepared by **General Procedure D** on a 1 mmol scale. Obtain a white solid (67% yield).

**<sup>1</sup>H NMR** (400 MHz,  $CDCl_3$ )  $\delta$  7.79 (d,  $J = 8.9$  Hz, 2H), 6.97 (d,  $J = 8.9$  Hz, 2H), 4.65 (td,  $J = 10.9$ , 4.2 Hz, 1H), 4.51 (s, 1H), 3.86 (s, 3H), 2.90 (t,  $J = 7.2$  Hz, 2H), 2.23 (t,  $J = 7.4$  Hz, 2H), 1.99 – 1.90 (m, 1H), 1.89 – 1.77 (m, 1H), 1.72 – 1.61 (m, 2H), 1.61 – 1.50 (m, 2H), 1.50 – 1.39 (m, 3H), 1.39 – 1.29 (m, 1H), 1.29 – 1.21 (m, 4H), 1.10 – 0.80 (m, 9H), 0.73 (d,  $J = 6.8$  Hz, 3H).

**<sup>13</sup>C NMR** (101 MHz,  $CDCl_3$ )  $\delta$  173.26, 162.83, 131.54, 129.21, 114.23, 73.99, 55.62, 47.00, 43.08, 40.95, 34.51, 34.26, 31.38, 29.38, 28.54, 26.25, 26.19, 24.86, 23.40, 22.04, 20.77, 16.29.

**HRMS:** Calcd for  $C_{24}H_{40}NO_5S^+[M+H]^+$ : 454.2622, found: 454.2638

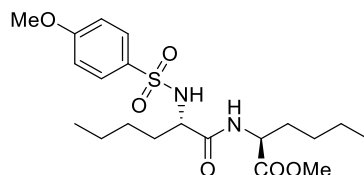

**1af**

**methyl (S)-2-(((S)-2-((4-methoxyphenyl)sulfonamido)hexanamido)hexanoate**

Prepared on page S9. Obtain a white solid (8% yield).

**<sup>1</sup>H NMR** (400 MHz,  $CDCl_3$ )  $\delta$  7.78 (d,  $J = 8.9$  Hz, 2H), 6.94 (d,  $J = 9.0$  Hz, 2H), 6.38 (s, 1H), 5.32 (s, 1H), 4.39 (td,  $J = 7.5$ , 5.5 Hz, 1H), 3.84 (s, 3H), 3.72 (s, 3H), 3.70 – 3.64 (m, 1H), 1.76 – 1.61 (m, 2H), 1.61 – 1.45 (m, 2H), 1.29 – 1.17 (m, 6H), 1.17 – 1.07 (m, 2H), 0.86 (t,  $J = 7.3$  Hz, 3H), 0.81 (t,  $J = 6.8$  Hz, 3H).

**<sup>13</sup>C NMR** (101 MHz,  $CDCl_3$ )  $\delta$  172.50, 170.73, 163.07, 131.31, 129.46, 114.21, 56.63, 55.59, 52.39, 52.33, 33.28, 31.95, 27.21, 27.07, 22.20, 22.18, 13.81, 13.79.

**HRMS:** Calcd for  $C_{20}H_{33}N_2O_6S^+[M+H]^+$ : 429.2054, found: 429.2050

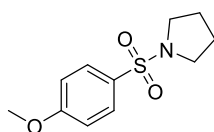

**1-((4-methoxyphenyl)sulfonyl)pyrrolidine**

Prepared by **General Procedure B** on a 5 mmol scale. Obtain a white solid (92% yield).

**<sup>1</sup>H NMR** (400 MHz, CDCl<sub>3</sub>) δ 7.75 (d, *J* = 8.9 Hz, 2H), 6.98 (d, *J* = 8.9 Hz, 2H), 3.86 (s, 3H), 3.26 – 3.14 (m, 4H), 1.77 – 1.70 (m, 4H).

**<sup>13</sup>C NMR** (101 MHz, CDCl<sub>3</sub>) δ 162.85, 129.62, 128.59, 114.15, 55.60, 47.92, 25.18.

Data are consistent with reported in the literature<sup>11</sup>.



### 11.3 Fluorinated Products

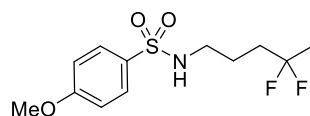

**3a**

#### *N*-(4,4-difluoropentyl)-4-methoxybenzenesulfonamide

Prepared by **General procedure E** on a 0.2 mmol scale and purified by flash chromatography on silica gel (PE/EtOAc = 3/1). Obtained as a white solid (80% yield) as a 0.3:99.7 mixture of mono-/difluorinated product.

**<sup>1</sup>H NMR** (400 MHz, CDCl<sub>3</sub>) δ 7.79 (d, *J* = 8.9 Hz, 2H), 6.97 (d, *J* = 9.0 Hz, 2H), 4.89 (s, 1H), 3.86 (s, 3H), 2.95 (q, *J* = 6.7 Hz, 2H), 1.84 (tt, *J* = 16.0, 7.9 Hz, 2H), 1.65 (p, *J* = 7.0 Hz, 2H), 1.53 (t, *J* = 18.3 Hz, 3H).

**<sup>13</sup>C NMR** (101 MHz, CDCl<sub>3</sub>) δ 162.94, 131.41, 129.16, 123.88 (t, *J* = 238.0 Hz), 114.32, 55.62, 42.63, 34.87 (t, *J* = 25.8 Hz), 23.39 (t, *J* = 27.9 Hz), 22.94 (t, *J* = 4.4 Hz).

**<sup>19</sup>F NMR** (376 MHz, CDCl<sub>3</sub>) δ -91.10.

**HRMS:** Calcd for C<sub>12</sub>H<sub>17</sub>F<sub>2</sub>NNaO<sub>3</sub>S<sup>+</sup>[M+Na]<sup>+</sup>: 316.0789, found: 316.0782

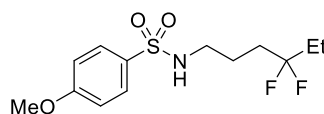

**3b**

#### *N*-(4,4-difluorohexyl)-4-methoxybenzenesulfonamide

Prepared by **General procedure E** on a 0.2 mmol scale and purified by flash chromatography on silica gel (PE/EtOAc = 4/1). Obtained as a colorless oil (80% yield) as a 7.7:92.3 mixture of mono-/difluorinated product.

**<sup>1</sup>H NMR** (400 MHz, CDCl<sub>3</sub>) δ 7.79 (d, *J* = 8.9 Hz, 2H), 6.97 (d, *J* = 8.9 Hz, 2H), 4.86 (s, 1H), 3.86 (s, 3H), 2.96 (q, *J* = 6.7 Hz, 2H), 1.90 – 1.54 (m, 6H), 0.95 (t, *J* = 7.6 Hz, 3H).

**<sup>13</sup>C NMR** (101 MHz, CDCl<sub>3</sub>) δ 162.93, 131.45, 129.17, 125.07 (t, *J* = 240.5 Hz), 114.31, 55.61, 42.73, 32.85 (t, *J* = 25.9 Hz), 29.73 (t, *J* = 26.2 Hz), 22.56, 6.53.

**<sup>19</sup>F NMR** (376 MHz, CDCl<sub>3</sub>) δ -100.56.

**HRMS:** Calcd for C<sub>13</sub>H<sub>20</sub>F<sub>2</sub>NO<sub>3</sub>S<sup>+</sup>[M+H]<sup>+</sup>: 308.1126, found: 308.1016

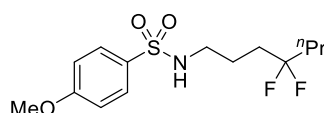

**3c**

#### *N*-(4,4-difluoroheptyl)-4-methoxybenzenesulfonamide

Prepared by **General procedure E** on a 0.2 mmol scale and purified by flash chromatography on

silica gel (PE/EtOAc = 4/1). Obtained as a colorless oil (71% yield) as a 3.3:96.7 mixture of mono-/difluorinated product.

**<sup>1</sup>H NMR** (400 MHz, CDCl<sub>3</sub>) δ 7.79 (d, *J* = 8.2 Hz, 2H), 6.97 (d, *J* = 8.1 Hz, 2H), 4.87 (s, 1H), 3.86 (s, 3H), 3.04 – 2.88 (m, 2H), 1.95 – 1.55 (m, 6H), 1.50 – 1.36 (m, 2H), 0.92 (t, *J* = 7.3 Hz, 3H).

**<sup>13</sup>C NMR** (101 MHz, CDCl<sub>3</sub>) δ 162.94, 131.39, 129.19, 124.85 (t, *J* = 240.5 Hz), 114.32, 55.63, 42.73, 38.62 (t, *J* = 25.0 Hz), 33.24 (t, *J* = 25.9 Hz), 22.57 (t, *J* = 4.4 Hz), 15.75 (t, *J* = 5.0 Hz), 13.89.

**<sup>19</sup>F NMR** (376 MHz, CDCl<sub>3</sub>) δ -98.33.

**HRMS:** Calcd for C<sub>14</sub>H<sub>22</sub>F<sub>2</sub>NO<sub>3</sub>S<sup>+</sup>[M+H]<sup>+</sup>: 322.1283, found: 322.1291

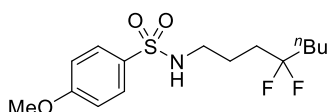

### 3d

#### N-(4,4-difluorooctyl)-4-methoxybenzenesulfonamide

Prepared by **General procedure E** on a 0.2 mmol scale and purified by flash chromatography on silica gel (PE/EtOAc = 5/1). Obtained as a colorless oil (68% yield) as a 5.2:94.8 mixture of mono-/difluorinated product.

**<sup>1</sup>H NMR** (400 MHz, CDCl<sub>3</sub>) δ 7.79 (d, *J* = 8.9 Hz, 2H), 6.97 (d, *J* = 8.9 Hz, 2H), 4.84 (t, *J* = 6.5 Hz, 1H), 3.86 (s, 3H), 2.96 (q, *J* = 6.7 Hz, 2H), 1.89 – 1.57 (m, 6H), 1.47 – 1.20 (m, 4H), 0.89 (t, *J* = 7.1 Hz, 3H).

**<sup>13</sup>C NMR** (101 MHz, CDCl<sub>3</sub>) δ 162.93, 131.47, 129.17, 124.92 (t, *J* = 240.5 Hz), 114.30, 55.60, 42.73, 36.29 (t, *J* = 25.2 Hz), 33.26 (t, *J* = 25.9 Hz), 24.34, 22.60, 22.42, 13.78.

**<sup>19</sup>F NMR** (376 MHz, CDCl<sub>3</sub>) δ -98.34.

**HRMS:** Calcd for C<sub>15</sub>H<sub>24</sub>F<sub>2</sub>NO<sub>3</sub>S<sup>+</sup>[M+H]<sup>+</sup>: 336.1439, found: 336.1430

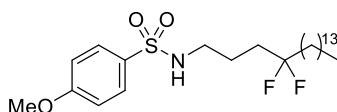

### 3e

#### N-(4,4-difluorooctadecyl)-4-methoxybenzenesulfonamide

Prepared by **General procedure E** on a 0.2 mmol scale, the reaction time was extended to 4 hours and purified by flash chromatography on silica gel (PE/EtOAc = 20/1 + 2% AcOH). Obtained as a white solid (41% yield) as a 11.9:88.1 mixture of mono-/difluorinated product.

**<sup>1</sup>H NMR** (400 MHz, CDCl<sub>3</sub>) δ 7.79 (d, *J* = 8.9 Hz, 2H), 6.98 (d, *J* = 8.8 Hz, 2H), 4.65 (s, 1H), 3.87 (s, 3H), 2.97 (q, *J* = 6.7 Hz, 2H), 1.91 – 1.56 (m, 6H), 1.45 – 1.35 (m, 2H), 1.34 – 1.16 (m, 23H), 0.87 (t, *J* = 6.8 Hz, 3H).

**<sup>13</sup>C NMR** (101 MHz, CDCl<sub>3</sub>) δ 162.96, 131.56, 129.18, 124.89 (t, *J* = 240.7 Hz), 114.31, 55.60, 42.74, 36.64 (t, *J* = 25.2 Hz), 33.27 (t, *J* = 25.9 Hz), 29.67, 29.66, 29.63, 29.59, 29.55, 29.47, 29.36, 29.35, 29.33, 22.63 (t, *J* = 4.0 Hz), 22.27 (t, *J* = 4.6 Hz), 14.07.

**<sup>19</sup>F NMR** (376 MHz, CDCl<sub>3</sub>) δ -98.41.

**HRMS:** Calcd for C<sub>25</sub>H<sub>44</sub>F<sub>2</sub>NO<sub>3</sub>S<sup>+</sup>[M+H]<sup>+</sup>: 476.3004, found: 476.3009

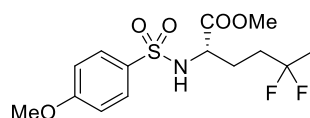

**3f**

**methyl (S)-5,5-difluoro-2-((4-methoxyphenyl)sulfonamido)hexanoate**

Prepared by **General procedure E** on a 0.2 mmol scale and purified by flash chromatography on silica gel (PE/EtOAc = 4/1). Obtained as a white solid (90% yield) as a 4.9:95.1 mixture of mono-/difluorinated product.

**<sup>1</sup>H NMR** (400 MHz, CDCl<sub>3</sub>) δ 7.76 (d, *J* = 8.9 Hz, 2H), 6.96 (d, *J* = 8.9 Hz, 2H), 5.22 (s, 1H), 3.93 – 3.87 (m, 1H), 3.86 (s, 3H), 3.53 (s, 3H), 2.06 – 1.72 (m, 4H), 1.57 (t, *J* = 18.4 Hz, 3H).

**<sup>13</sup>C NMR** (101 MHz, CDCl<sub>3</sub>) δ 171.70, 163.16, 130.98, 129.43, 123.46 (t, *J* = 238.3 Hz), 114.24, 55.64, 55.18, 52.72, 33.64 (t, *J* = 25.9 Hz), 26.39 (t, *J* = 4.6 Hz), 23.56 (t, *J* = 27.8 Hz).

**<sup>19</sup>F NMR** (376 MHz, CDCl<sub>3</sub>) δ -91.96.

**HRMS:** Calcd for C<sub>14</sub>H<sub>20</sub>F<sub>2</sub>NO<sub>5</sub>S<sup>+</sup>[M+H]<sup>+</sup>: 352.1025, found: 352.1033

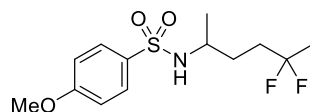

**3g**

**N-(5,5-difluorohexan-2-yl)-4-methoxybenzenesulfonamide**

Prepared by **General procedure E** on a 0.2 mmol scale and purified by flash chromatography on silica gel (PE/EtOAc = 5/1). Obtained as a white solid (86% yield), monofluorinated byproduct not detected.

**<sup>1</sup>H NMR** (400 MHz, CDCl<sub>3</sub>) δ 7.81 (d, *J* = 8.9 Hz, 2H), 6.97 (d, *J* = 8.9 Hz, 2H), 4.56 (brs, 1H), 3.87 (s, 3H), 3.38 – 3.22 (m, 1H), 1.95 – 1.47 (m, 7H), 1.07 – 0.93 (m, 3H).

**<sup>13</sup>C NMR** (101 MHz, CDCl<sub>3</sub>) δ 162.89, 132.68, 129.11, 123.90 (t, *J* = 238.0 Hz), 114.27, 55.61, 49.62, 34.19 (t, *J* = 25.7 Hz), 30.33 (t, *J* = 4.3 Hz), 23.45 (t, *J* = 27.9 Hz), 21.63.

**<sup>19</sup>F NMR** (376 MHz, CDCl<sub>3</sub>) δ -91.35.

**HRMS:** Calcd for C<sub>13</sub>H<sub>20</sub>F<sub>2</sub>NO<sub>3</sub>S<sup>+</sup>[M+H]<sup>+</sup>: 308.1126, found: 308.1136

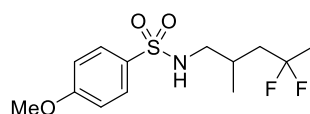

**3h**

**N-(4-fluoro-2-methylpentyl)-4-methoxybenzenesulfonamide**

Prepared by **General procedure E** on a 0.2 mmol scale and purified by flash chromatography on silica gel (PE/EtOAc = 3/1). Obtained as a colorless oil (89% yield) as a 1.3:98.7 mixture of mono-/difluorinated product.

**<sup>1</sup>H NMR** (400 MHz, CDCl<sub>3</sub>) δ 7.78 (d, *J* = 8.9 Hz, 2H), 6.97 (d, *J* = 8.9 Hz, 2H), 4.96 (s, 1H), 3.85 (d, *J* = 0.9 Hz, 3H), 2.93 – 2.69 (m, 2H), 2.02 – 1.84 (m, 2H), 1.74 – 1.60 (m, 1H), 1.54 (t, *J* = 18.6 Hz, 3H), 0.97 (d, *J* = 6.4 Hz, 3H).

**<sup>13</sup>C NMR** (101 MHz, CDCl<sub>3</sub>) δ 162.89, 131.53, 129.13, 124.23 (t, *J* = 238.4 Hz), 114.29, 55.61, 48.88, 41.46 (t, *J* = 24.6 Hz), 28.62 (t, *J* = 3.1 Hz), 24.04 (t, *J* = 27.9 Hz), 18.53.

**<sup>19</sup>F NMR** (376 MHz, CDCl<sub>3</sub>) δ -88.79 (dd, *J* = 353.1, 239.9 Hz).

**HRMS:** Calcd for C<sub>13</sub>H<sub>20</sub>FNO<sub>3</sub>S<sup>+</sup>[M+H]<sup>+</sup>: 308.1126, found: 308.1123

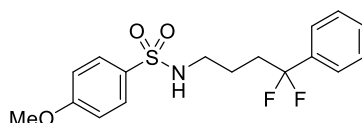

**3i**

**N-(4,4-difluoro-4-phenylbutyl)-4-methoxybenzenesulfonamide**

Prepared by **General procedure E** on a 0.2 mmol scale and purified by flash chromatography on silica gel (PE/EtOAc = 5/1). Obtained as a colorless oil (51% yield) as a 7.1:92.9 mixture of mono-/difluorinated product.

**<sup>1</sup>H NMR** (400 MHz, CDCl<sub>3</sub>) δ 7.77 (d, *J* = 8.9 Hz, 2H), 7.45 – 7.36 (m, 5H), 6.95 (d, *J* = 8.9 Hz, 2H), 4.80 (t, *J* = 6.4 Hz, 1H), 3.85 (s, 3H), 2.95 (q, *J* = 6.7 Hz, 2H), 2.22 – 2.02 (m, 2H), 1.69 – 1.56 (m, 2H).

**<sup>13</sup>C NMR** (101 MHz, CDCl<sub>3</sub>) δ 162.94, 136.94 (t, *J* = 26.5 Hz), 131.45, 129.78, 129.15, 128.46, 124.80 (t, *J* = 6.3 Hz), 122.63 (t, *J* = 242.5 Hz), 114.31, 55.61, 42.57, 36.07 (t, *J* = 28.1 Hz), 22.94.

**<sup>19</sup>F NMR** (376 MHz, CDCl<sub>3</sub>) δ -95.73.

**HRMS:** Calcd for C<sub>17</sub>H<sub>20</sub>F<sub>2</sub>NO<sub>3</sub>S<sup>+</sup>[M+H]<sup>+</sup>: 356.1126, found: 356.1116

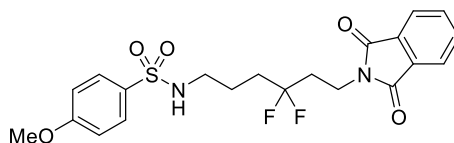

**3j**

**N-(6-(1,3-dioxoisindolin-2-yl)-4,4-difluorohexyl)-4-methoxybenzenesulfonamide**

Prepared by **General procedure E** on a 0.2 mmol scale and purified by flash chromatography on silica gel (PE/EtOAc = 2/1). Obtained as a white solid (62% yield) as a 0.7:99.3 mixture of mono-/difluorinated product.

**<sup>1</sup>H NMR** (400 MHz, CDCl<sub>3</sub>) δ 7.84 (dd, *J* = 5.5, 3.0 Hz, 2H), 7.79 (d, *J* = 8.9 Hz, 2H), 7.72 (dd, *J* = 5.5, 3.0 Hz, 2H), 6.97 (d, *J* = 8.9 Hz, 2H), 4.68 (s, 1H), 3.91 – 3.86 (m, 2H), 3.85 (s, 3H), 2.98 (t, *J* = 6.6 Hz, 2H), 2.20 (tt, *J* = 16.2, 7.3 Hz, 2H), 2.03 – 1.82 (m, 2H), 1.75 – 1.60 (m, 2H).

**<sup>13</sup>C NMR** (101 MHz, CDCl<sub>3</sub>) δ 167.98, 162.95, 134.07, 132.02, 131.58, 129.19, 123.64 (t, *J* = 241.5

Hz), 123.35, 114.32, 55.60, 42.54, 34.78 (t,  $J = 25.3$  Hz), 33.27 (t,  $J = 25.1$  Hz), 31.82 (t,  $J = 5.8$  Hz), 22.46 (t,  $J = 4.3$  Hz).

$^{19}\text{F}$  NMR (376 MHz,  $\text{CDCl}_3$ )  $\delta$  -98.95.

HRMS: Calcd for  $\text{C}_{21}\text{H}_{23}\text{F}_2\text{N}_2\text{O}_5\text{S}^+[\text{M}+\text{H}]^+$ : 453.1290, found: 453.1282

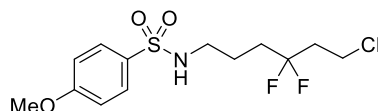

### 3k

#### N-(6-chloro-4,4-difluorohexyl)-4-methoxybenzenesulfonamide

Prepared by **General procedure E** on a 0.2 mmol scale and purified by flash chromatography on silica gel (PE/EtOAc = 5/1). Obtained as a white solid (55% yield) as a 2.3:97.7 mixture of mono-/difluorinated product.

$^1\text{H}$  NMR (400 MHz,  $\text{CDCl}_3$ )  $\delta$  7.79 (d,  $J = 8.9$  Hz, 2H), 6.98 (d,  $J = 8.9$  Hz, 2H), 4.88 (s, 1H), 3.86 (s, 3H), 3.65 – 3.54 (m, 2H), 2.97 (q,  $J = 6.4$  Hz, 2H), 2.27 (tt,  $J = 15.8, 7.6$  Hz, 2H), 1.96 – 1.80 (m, 2H), 1.72 – 1.62 (m, 2H).

$^{13}\text{C}$  NMR (101 MHz,  $\text{CDCl}_3$ )  $\delta$  163.01, 131.43, 129.18, 123.22 (t,  $J = 241.8$  Hz), 114.36, 55.63, 42.52, 39.83 (t,  $J = 25.6$  Hz), 36.85 (t,  $J = 6.3$  Hz), 33.67 (t,  $J = 25.1$  Hz), 22.43 (t,  $J = 4.4$  Hz).

$^{19}\text{F}$  NMR (376 MHz,  $\text{CDCl}_3$ )  $\delta$  -98.72.

HRMS: Calcd for  $\text{C}_{13}\text{H}_{19}\text{ClF}_2\text{NO}_3\text{S}^+[\text{M}+\text{H}]^+$ : 342.0737, found: 342.0731

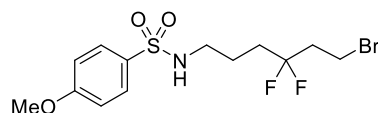

### 3l

#### N-(6-bromo-4,4-difluorohexyl)-4-methoxybenzenesulfonamide

Prepared by **General procedure E** on a 0.2 mmol scale and purified by flash chromatography on silica gel (PE/EtOAc = 5/1). Obtained as a white solid (35% yield) as a 1.8:98.2 mixture of mono-/difluorinated product.

$^1\text{H}$  NMR (400 MHz,  $\text{CDCl}_3$ )  $\delta$  7.79 (d,  $J = 9.0$  Hz, 2H), 6.98 (d,  $J = 9.0$  Hz, 2H), 4.66 (t,  $J = 5.8$  Hz, 1H), 3.87 (s, 3H), 3.45 – 3.38 (m, 2H), 2.98 (q,  $J = 6.5$  Hz, 2H), 2.46 – 2.29 (m, 2H), 1.95 – 1.79 (m, 2H), 1.72 – 1.59 (m, 2H).

$^{13}\text{C}$  NMR (101 MHz,  $\text{CDCl}_3$ )  $\delta$  163.02, 131.47, 129.18, 123.40 (t,  $J = 243.2$  Hz), 114.36, 55.63, 42.53, 40.33 (t,  $J = 25.7$  Hz), 33.55 (t,  $J = 25.1$  Hz), 23.20 (t,  $J = 6.0$  Hz), 22.45 (t,  $J = 4.4$  Hz).

$^{19}\text{F}$  NMR (376 MHz,  $\text{CDCl}_3$ )  $\delta$  -99.24.

HRMS: Calcd for  $\text{C}_{13}\text{H}_{19}\text{BrF}_2\text{NO}_3\text{S}^+[\text{M}+\text{H}]^+$ : 386.0232, found: 386.0226

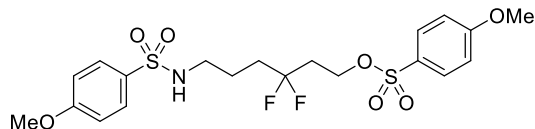

**3m**

**3,3-difluoro-6-((4-methoxyphenyl)sulfonamido)hexyl 4-methoxybenzenesulfonate**

Prepared by **General procedure E** on a 0.2 mmol scale and purified by flash chromatography on silica gel (PE/EtOAc = 2/1). Obtained as a colorless oil (75% yield), monofluorinated byproduct not detected.

**<sup>1</sup>H NMR** (400 MHz, CDCl<sub>3</sub>) δ 7.85 (d, *J* = 9.0 Hz, 2H), 7.79 (d, *J* = 9.0 Hz, 2H), 7.03 (d, *J* = 9.0 Hz, 2H), 6.98 (d, *J* = 9.0 Hz, 2H), 4.68 (brs, 1H), 4.15 (t, *J* = 6.5 Hz, 2H), 3.89 (s, 3H), 3.87 (s, 3H), 2.95 (t, *J* = 6.7 Hz, 2H), 2.20 (tt, *J* = 15.6, 6.5 Hz, 2H), 1.94 – 1.78 (m, 2H), 1.69 – 1.59 (m, 2H).

**<sup>13</sup>C NMR** (101 MHz, CDCl<sub>3</sub>) δ 164.05, 162.97, 131.31, 130.22, 129.21, 126.72, 123.20 (t, *J* = 241.5 Hz), 114.67, 114.36, 63.97 (t, *J* = 6.1 Hz), 55.80, 55.67, 42.48, 35.92 (t, *J* = 26.0 Hz), 33.63 (t, *J* = 25.3 Hz), 22.40 (t, *J* = 4.3 Hz).

**<sup>19</sup>F NMR** (376 MHz, CDCl<sub>3</sub>) δ -97.26.

**HRMS:** Calcd for C<sub>20</sub>H<sub>25</sub>F<sub>2</sub>NNaO<sub>7</sub>S<sup>+</sup>[M+Na]<sup>+</sup>: 494.1113, found: 494.1124

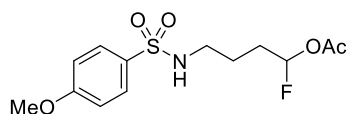

**3n**

**1-fluoro-4-((4-methoxyphenyl)sulfonamido)butyl acetate**

Prepared by **General procedure E** on a 0.2 mmol scale and purified by flash chromatography on silica gel (PE/EtOAc = 2/1). Obtained as a colorless oil (64% yield) as a 98.7:1.3 mixture of mono-/difluorinated product.

**<sup>1</sup>H NMR** (400 MHz, CDCl<sub>3</sub>) δ 7.79 (d, *J* = 8.9 Hz, 2H), 6.97 (d, *J* = 8.9 Hz, 2H), 6.25 (dt, *J* = 55.7, 4.9 Hz, 1H), 4.93 (s, 1H), 3.86 (s, 3H), 2.96 (q, *J* = 6.6 Hz, 2H), 2.09 (s, 3H), 1.89 – 1.71 (m, 2H), 1.68 – 1.54 (m, 2H).

**<sup>13</sup>C NMR** (101 MHz, CDCl<sub>3</sub>) δ 168.98, 162.94, 131.40, 129.16, 114.32, 102.51 (d, *J* = 221.4 Hz), 55.62, 42.49, 30.20 (d, *J* = 22.7 Hz), 23.17 (d, *J* = 4.5 Hz), 20.76.

**<sup>19</sup>F NMR** (376 MHz, CDCl<sub>3</sub>) δ -129.20.

**HRMS:** Calcd for C<sub>13</sub>H<sub>19</sub>FNO<sub>5</sub>S<sup>+</sup>[M+H]<sup>+</sup>: 320.0962, found: 320.0984

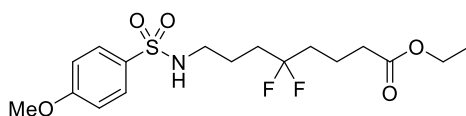

**3o**

**ethyl 5,5-difluoro-8-((4-methoxyphenyl)sulfonamido)octanoate**

Prepared by **General procedure E** on a 0.2 mmol scale and purified by flash chromatography on silica gel (PE/EtOAc = 2.5/1). Obtained as a colorless oil (76% yield) as a 14.8:85.2 mixture of mono-/difluorinated product.

**<sup>1</sup>H NMR** (400 MHz, CDCl<sub>3</sub>) δ 7.79 (d, *J* = 8.5 Hz, 2H), 6.97 (d, *J* = 8.4 Hz, 2H), 4.73 (s, 1H), 4.12 (q, *J* = 6.8 Hz, 2H), 3.86 (s, 3H), 2.96 (t, *J* = 7.0 Hz, 2H), 2.33 (t, *J* = 6.8 Hz, 2H), 1.93 – 1.50 (m, 8H), 1.25 (t, *J* = 7.0 Hz, 3H).

**<sup>13</sup>C NMR** (101 MHz, CDCl<sub>3</sub>) δ 173.02, 162.93, 131.39, 129.19, 124.53 (t, *J* = 240.8 Hz), 114.31, 60.49, 55.64, 42.65, 35.73 (t, *J* = 25.5 Hz), 33.52, 33.27 (t, *J* = 25.8 Hz), 22.53 (t, *J* = 4.3 Hz), 17.77 (t, *J* = 4.9 Hz), 14.23.

**<sup>19</sup>F NMR** (376 MHz, CDCl<sub>3</sub>) δ -98.71.

**HRMS:** Calcd for C<sub>17</sub>H<sub>26</sub>F<sub>2</sub>NO<sub>5</sub>S<sup>+</sup>[M+H]<sup>+</sup>: 394.1494, found: 394.1506

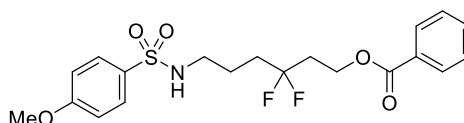

### 3p

#### **3,3-difluoro-6-((4-methoxyphenyl)sulfonamido)hexyl benzoate**

Prepared by **General procedure E** on a 0.2 mmol scale and purified by flash chromatography on silica gel (PE/EtOAc = 4/1). Obtained as a white solid (66% yield) as a 3.5:96.5 mixture of mono-/difluorinated product.

**<sup>1</sup>H NMR** (400 MHz, CDCl<sub>3</sub>) δ 8.02 (d, *J* = 6.9 Hz, 2H), 7.78 (d, *J* = 8.9 Hz, 2H), 7.57 (t, *J* = 7.5 Hz, 1H), 7.45 (t, *J* = 7.8 Hz, 2H), 6.96 (d, *J* = 8.9 Hz, 2H), 4.72 (s, 1H), 4.47 (t, *J* = 6.6 Hz, 2H), 3.85 (s, 3H), 2.98 (t, *J* = 5.8 Hz, 2H), 2.29 (tt, *J* = 16.0, 6.5 Hz, 2H), 2.04 – 1.86 (m, 2H), 1.78 – 1.64 (m, 2H).

**<sup>13</sup>C NMR** (101 MHz, CDCl<sub>3</sub>) δ 166.33, 162.95, 133.16, 131.44, 129.85, 129.58, 129.16, 128.48, 123.57 (t, *J* = 241.5 Hz), 114.32, 58.84 (t, *J* = 6.0 Hz), 55.61, 42.61, 35.85 (t, *J* = 25.6 Hz), 33.77 (t, *J* = 25.3 Hz), 22.51 (t, *J* = 4.4 Hz).

**<sup>19</sup>F NMR** (376 MHz, CDCl<sub>3</sub>) δ -97.82.

**HRMS:** Calcd for C<sub>20</sub>H<sub>24</sub>F<sub>2</sub>NO<sub>5</sub>S<sup>+</sup>[M+H]<sup>+</sup>: 428.1338, found: 428.1333

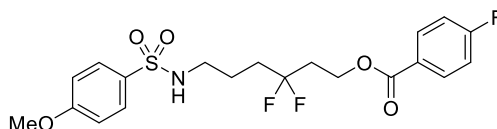

### 3q

#### **3,3-difluoro-6-((4-methoxyphenyl)sulfonamido)hexyl 4-fluorobenzoate**

Prepared by **General procedure E** on a 0.2 mmol scale and purified by flash chromatography on silica gel (PE/EtOAc = 4/1). Obtained as a white solid (72% yield) as a 2.7:97.3 mixture of mono-/difluorinated product.

**<sup>1</sup>H NMR** (400 MHz, CDCl<sub>3</sub>) δ 8.05 – 7.99 (m, 2H), 7.77 (d, *J* = 8.9 Hz, 2H), 7.14 – 7.06 (m, 2H), 6.95 (d, *J* = 8.9 Hz, 2H), 5.02 (s, 1H), 4.45 (t, *J* = 6.5 Hz, 2H), 3.84 (s, 3H), 2.96 (q, *J* = 6.3 Hz,

2H), 2.27 (tt,  $J = 16.1, 6.5$  Hz, 2H), 2.02 – 1.85 (m, 2H), 1.76 – 1.63 (m, 2H).

**$^{13}\text{C}$  NMR** (101 MHz,  $\text{CDCl}_3$ )  $\delta$  165.88 (d,  $J = 254.2$  Hz), 165.38, 162.97, 132.17 (d,  $J = 9.4$  Hz), 131.47, 129.14, 126.14 (d,  $J = 3.0$  Hz), 123.58 (t,  $J = 241.6$  Hz), 115.62 (d,  $J = 22.0$  Hz), 114.33, 58.95 (t,  $J = 5.8$  Hz), 55.59, 42.59, 35.80 (t,  $J = 25.6$  Hz), 33.81 (t,  $J = 25.2$  Hz), 22.47 (t,  $J = 4.3$  Hz).

**$^{19}\text{F}$  NMR** (376 MHz,  $\text{CDCl}_3$ )  $\delta$  -97.90, -105.29.

**HRMS:** Calcd for  $\text{C}_{20}\text{H}_{23}\text{F}_3\text{NO}_5\text{S}^+[\text{M}+\text{H}]^+$ : 446.1244, found: 446.1230

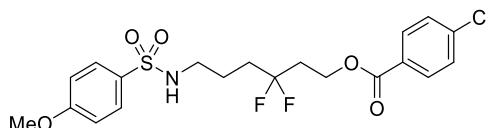

### 3r

#### **3,3-difluoro-6-((4-methoxyphenyl)sulfonamido)hexyl 4-chlorobenzoate**

Prepared by **General procedure E** on a 0.2 mmol scale and purified by flash chromatography on silica gel (PE/EtOAc = 4/1). Obtained as a colorless oil (73% yield) as a 1.5:98.5 mixture of mono-/difluorinated product.

**$^1\text{H}$  NMR** (400 MHz,  $\text{CDCl}_3$ )  $\delta$  7.96 (d,  $J = 8.7$  Hz, 2H), 7.78 (d,  $J = 9.0$  Hz, 2H), 7.43 (d,  $J = 8.7$  Hz, 2H), 6.98 (d,  $J = 9.0$  Hz, 2H), 4.49 (t,  $J = 6.5$  Hz, 2H), 4.38 (s, 1H), 3.87 (s, 3H), 3.02 – 2.97 (m, 2H), 2.30 (tt,  $J = 16.1, 6.5$  Hz, 2H), 2.06 – 1.88 (m, 2H), 1.78 – 1.66 (m, 2H).

**$^{13}\text{C}$  NMR** (101 MHz,  $\text{CDCl}_3$ )  $\delta$  165.49, 162.99, 139.67, 131.45, 131.00, 129.16, 128.85, 128.32, 123.52 (t,  $J = 241.6$  Hz), 114.34, 59.04 (t,  $J = 5.8$  Hz), 55.61, 42.59, 35.84 (t,  $J = 25.7$  Hz), 33.79 (t,  $J = 25.2$  Hz), 22.50 (t,  $J = 4.3$  Hz).

**$^{19}\text{F}$  NMR** (376 MHz,  $\text{CDCl}_3$ )  $\delta$  -98.03.

**HRMS:** Calcd for  $\text{C}_{20}\text{H}_{23}\text{ClF}_2\text{NO}_5\text{S}^+[\text{M}+\text{H}]^+$ : 462.0948, found: 462.0954

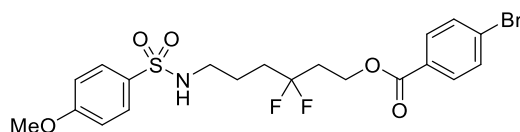

### 3s

#### **3,3-difluoro-6-((4-methoxyphenyl)sulfonamido)hexyl 4-bromobenzoate**

Prepared by **General procedure E** on a 0.2 mmol scale and purified by flash chromatography on silica gel (PE/EtOAc = 2/1). Obtained as a light yellow oil (71% yield) as a 4.4:95.6 mixture of mono-/difluorinated product.

**$^1\text{H}$  NMR** (400 MHz,  $\text{CDCl}_3$ )  $\delta$  7.87 (d,  $J = 8.7$  Hz, 2H), 7.78 (d,  $J = 9.0$  Hz, 2H), 7.59 (d,  $J = 8.7$  Hz, 2H), 6.97 (d,  $J = 9.0$  Hz, 2H), 4.65 (s, 1H), 4.47 (t,  $J = 6.5$  Hz, 2H), 3.86 (s, 3H), 2.98 (q,  $J = 6.3$  Hz, 2H), 2.29 (tt,  $J = 16.1, 6.5$  Hz, 2H), 2.07 – 1.85 (m, 2H), 1.76 – 1.67 (m, 2H).

**$^{13}\text{C}$  NMR** (101 MHz,  $\text{CDCl}_3$ )  $\delta$  165.63, 162.99, 131.85, 131.45, 131.13, 129.16, 128.77, 128.33, 123.51 (t,  $J = 241.5$  Hz), 114.34, 59.06 (t,  $J = 5.9$  Hz), 55.62, 42.58, 35.83 (t,  $J = 25.7$  Hz), 33.79



(t,  $J = 25.2$  Hz), 22.50 (t,  $J = 4.4$  Hz).

$^{19}\text{F}$  NMR (376 MHz,  $\text{CDCl}_3$ )  $\delta$  -97.98.

HRMS: Calcd for  $\text{C}_{20}\text{H}_{23}\text{BrF}_2\text{NO}_5\text{S}^+[\text{M}+\text{H}]^+$ : 506.0443, found: 506.0437

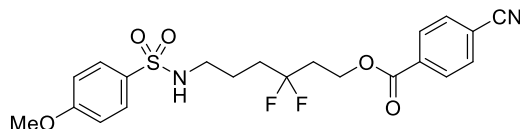

### 3t

#### **3,3-difluoro-6-((4-methoxyphenyl)sulfonamido)hexyl 4-cyanobenzoate**

Prepared by **General procedure E** on a 0.2 mmol scale and purified by flash chromatography on silica gel (PE/EtOAc = 2.5/1 to 2/1). Obtained as a light yellow oil (65% yield) as a 3.5:96.5 mixture of mono-/difluorinated product.

$^1\text{H}$  NMR (400 MHz,  $\text{CDCl}_3$ )  $\delta$  8.11 (d,  $J = 8.3$  Hz, 2H), 7.77 (d,  $J = 8.9$  Hz, 2H), 7.74 (d,  $J = 8.3$  Hz, 2H), 6.96 (d,  $J = 8.8$  Hz, 2H), 4.96 (s, 1H), 4.51 (t,  $J = 6.4$  Hz, 2H), 3.85 (s, 3H), 2.97 (q,  $J = 6.5$  Hz, 2H), 2.30 (tt,  $J = 16.1, 6.4$  Hz, 2H), 2.04 – 1.87 (m, 2H), 1.78 – 1.65 (m, 2H).

$^{13}\text{C}$  NMR (101 MHz,  $\text{CDCl}_3$ )  $\delta$  164.74, 162.99, 133.68, 132.33, 131.40, 130.14, 129.13, 123.48 (t,  $J = 241.6$  Hz), 117.94, 116.56, 114.35, 59.57 (t,  $J = 5.7$  Hz), 55.64, 42.56, 35.75 (t,  $J = 25.7$  Hz), 33.86 (t,  $J = 25.1$  Hz), 22.44 (t,  $J = 4.3$  Hz).

$^{19}\text{F}$  NMR (376 MHz,  $\text{CDCl}_3$ )  $\delta$  -98.22.

HRMS: Calcd for  $\text{C}_{21}\text{H}_{23}\text{F}_2\text{N}_2\text{O}_5\text{S}^+[\text{M}+\text{H}]^+$ : 453.1290, found: 453.1285

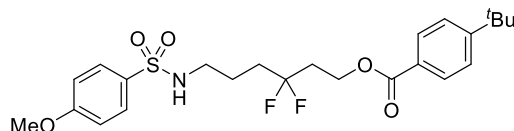

### 3u

#### **3,3-difluoro-6-((4-methoxyphenyl)sulfonamido)hexyl 4-(tert-butyl)benzoate**

Prepared by **General procedure E** on a 0.2 mmol scale and purified by flash chromatography on silica gel (PE/EtOAc = 3.5/1 to 3/1). Obtained as a colorless oil (75% yield) as a 1.0:99.0 mixture of mono-/difluorinated product.

$^1\text{H}$  NMR (400 MHz,  $\text{CDCl}_3$ )  $\delta$  7.95 (d,  $J = 8.3$  Hz, 2H), 7.78 (d,  $J = 8.7$  Hz, 2H), 7.47 (d,  $J = 8.3$  Hz, 2H), 6.96 (d,  $J = 8.7$  Hz, 2H), 4.62 (s, 1H), 4.46 (t,  $J = 6.5$  Hz, 2H), 3.85 (s, 3H), 2.99 (q,  $J = 6.8$  Hz, 2H), 2.29 (tt,  $J = 15.8, 6.5$  Hz, 2H), 1.94 (tt,  $J = 16.7, 7.9$  Hz, 2H), 1.75 – 1.66 (m, 2H), 1.34 (s, 9H).

$^{13}\text{C}$  NMR (101 MHz,  $\text{CDCl}_3$ )  $\delta$  166.38, 162.97, 156.93, 131.51, 129.48, 129.17, 127.05, 125.47, 123.61 (t,  $J = 241.5$  Hz), 114.32, 58.65 (t,  $J = 6.0$  Hz), 55.60, 42.61, 35.90 (t,  $J = 25.7$  Hz), 35.11, 33.74 (t,  $J = 25.2$  Hz), 31.10, 22.53 (t,  $J = 4.3$  Hz).

$^{19}\text{F}$  NMR (376 MHz,  $\text{CDCl}_3$ )  $\delta$  -97.61.

HRMS: Calcd for  $\text{C}_{24}\text{H}_{32}\text{F}_2\text{NO}_5\text{S}^+[\text{M}+\text{H}]^+$ : 484.1964, found: 484.1966

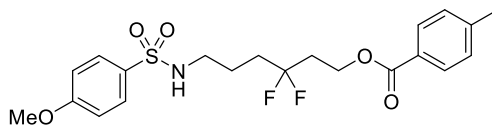

**3v**

**3,3-difluoro-6-((4-methoxyphenyl)sulfonamido)hexyl 4-methylbenzoate**

Prepared by **General procedure E** on a 0.2 mmol scale and purified by flash chromatography on silica gel (PE/EtOAc = 4/1 + 2% AcOH). Obtained as a white solid (60% yield) as a 4.3:95.7 mixture of mono-/difluorinated product.

**<sup>1</sup>H NMR** (400 MHz, CDCl<sub>3</sub>) δ 7.90 (d, *J* = 8.0 Hz, 2H), 7.78 (d, *J* = 8.9 Hz, 2H), 7.24 (d, *J* = 8.0 Hz, 2H), 6.96 (d, *J* = 8.6 Hz, 2H), 4.70 (brs, 1H), 4.45 (td, *J* = 6.6, 1.3 Hz, 2H), 3.85 (s, 3H), 2.97 (t, *J* = 6.8 Hz, 2H), 2.40 (s, 3H), 2.28 (tt, *J* = 15.8, 6.8 Hz, 2H), 2.05 – 1.85 (m, 2H), 1.77 – 1.63 (m, 2H).

**<sup>13</sup>C NMR** (101 MHz, CDCl<sub>3</sub>) δ 166.42, 162.96, 143.90, 131.53, 129.62, 129.19, 129.16, 127.14, 123.62 (t, *J* = 241.5 Hz), 114.32, 58.67 (t, *J* = 6.0 Hz), 55.59, 42.61, 35.86 (t, *J* = 25.6 Hz), 33.75 (t, *J* = 25.2 Hz), 22.52 (t, *J* = 4.3 Hz), 21.62.

**<sup>19</sup>F NMR** (376 MHz, CDCl<sub>3</sub>) δ -97.64.

**HRMS:** Calcd for C<sub>21</sub>H<sub>26</sub>F<sub>2</sub>NO<sub>5</sub>S<sup>+</sup>[M+H]<sup>+</sup>: 442.1494, found: 442.1503

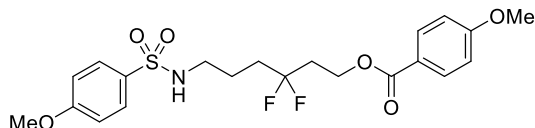

**3w**

**3,3-difluoro-6-((4-methoxyphenyl)sulfonamido)hexyl 4-methoxybenzoate**

Prepared by **General procedure E** on a 0.2 mmol scale and purified by flash chromatography on silica gel (PE/EtOAc = 3.5/1). Obtained as a white solid (70% yield) as a 0.3:99.7 mixture of mono-/difluorinated product.

**<sup>1</sup>H NMR** (400 MHz, CDCl<sub>3</sub>) δ 7.95 (d, *J* = 8.9 Hz, 2H), 7.77 (d, *J* = 8.9 Hz, 2H), 6.95 (d, *J* = 8.9 Hz, 2H), 6.91 (d, *J* = 8.9 Hz, 2H), 4.96 (s, 1H), 4.42 (t, *J* = 6.5 Hz, 2H), 3.84 (s, 3H), 3.83 (s, 3H), 2.95 (t, *J* = 8.1 Hz, 2H), 2.26 (tt, *J* = 16.0, 6.6 Hz, 2H), 2.00 – 1.85 (m, 2H), 1.75 – 1.62 (m, 2H).

**<sup>13</sup>C NMR** (101 MHz, CDCl<sub>3</sub>) δ 166.08, 163.59, 162.95, 131.63, 131.51, 129.15, 123.66 (t, *J* = 241.4 Hz), 122.25, 114.32, 113.78, 58.56 (t, *J* = 6.0 Hz), 55.59, 55.44, 42.62, 35.87 (t, *J* = 25.7 Hz), 33.77 (t, *J* = 25.3 Hz), 22.51 (t, *J* = 4.3 Hz).

**<sup>19</sup>F NMR** (376 MHz, CDCl<sub>3</sub>) δ -97.53.

**HRMS:** Calcd for C<sub>21</sub>H<sub>26</sub>F<sub>2</sub>NO<sub>6</sub>S<sup>+</sup>[M+H]<sup>+</sup>: 458.1443, found: 458.1444

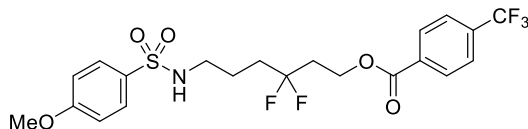

**3x**

**3,3-difluoro-6-((4-methoxyphenyl)sulfonamido)hexyl 4-(trifluoromethyl)benzoate**

Prepared by **General procedure E** on a 0.2 mmol scale and purified by flash chromatography on silica gel (PE/EtOAc = 4/1). Obtained as a colorless oil (69% yield) as a 1.9:98.1 mixture of mono-/difluorinated product.

**<sup>1</sup>H NMR** (400 MHz, CDCl<sub>3</sub>) δ 8.13 (d, *J* = 8.1 Hz, 2H), 7.78 (d, *J* = 8.7 Hz, 2H), 7.71 (d, *J* = 8.1 Hz, 2H), 6.97 (d, *J* = 8.7 Hz, 2H), 4.66 (s, 1H), 4.52 (t, *J* = 6.5 Hz, 2H), 3.86 (s, 3H), 2.99 (q, *J* = 7.6, 6.5 Hz, 2H), 2.39 – 2.23 (m, 2H), 1.97 (tt, *J* = 16.7, 7.9 Hz, 2H), 1.77 – 1.67 (m, 2H).

**<sup>13</sup>C NMR** (101 MHz, CDCl<sub>3</sub>) δ 165.15, 162.99, 134.63 (q, *J* = 32.8 Hz), 133.09, 131.41, 130.03, 129.15, 125.52 (q, *J* = 3.7 Hz), 123.61 (q, *J* = 272.8 Hz), 123.49 (t, *J* = 241.7 Hz), 114.34, 59.34 (t, *J* = 5.7 Hz), 55.60, 42.57, 35.78 (t, *J* = 25.7 Hz), 33.83 (t, *J* = 25.2 Hz), 22.48 (t, *J* = 4.2 Hz).

**<sup>19</sup>F NMR** (376 MHz, CDCl<sub>3</sub>) δ -63.16, -98.20.

**HRMS:** Calcd for C<sub>21</sub>H<sub>23</sub>F<sub>5</sub>NO<sub>5</sub>S<sup>+</sup>[M+H]<sup>+</sup>: 496.1212, found: 496.1226

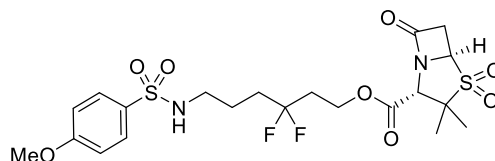

**3y**

**3,3-difluoro-6-((4-methoxyphenyl)sulfonamido)hexyl (2S,5R)-3,3-dimethyl-7-oxo-4-thia-1-azabicyclo[3.2.0]heptane-2-carboxylate 4,4-dioxide**

Prepared by **General procedure E** on a 0.2 mmol scale and purified by flash chromatography on silica gel (PE/EtOAc = 1.2/1). Obtained as a yellow oil (48% yield), as a 4.6:95.4 mixture of mono-/difluorinated product.

**<sup>1</sup>H NMR** (400 MHz, CDCl<sub>3</sub>) δ 7.79 (d, *J* = 8.9 Hz, 2H), 7.00 (d, *J* = 8.9 Hz, 2H), 4.98 (t, *J* = 6.4 Hz, 1H), 4.66 (dd, *J* = 4.4, 2.0 Hz, 1H), 4.47 – 4.32 (m, 3H), 3.88 (s, 3H), 3.58 – 3.40 (m, 2H), 2.97 (q, *J* = 6.6 Hz, 2H), 2.33 – 2.15 (m, 2H), 2.03 – 1.86 (m, 2H), 1.77 – 1.65 (m, 2H), 1.61 (s, 3H), 1.43 (s, 3H).

**<sup>13</sup>C NMR** (101 MHz, CDCl<sub>3</sub>) δ 171.07, 166.88, 162.98, 131.39, 129.14, 123.32 (t, *J* = 241.8 Hz), 114.36, 63.22, 62.83, 61.08, 60.18 (t, *J* = 5.6 Hz), 55.64, 42.48, 38.25, 35.48 (t, *J* = 25.7 Hz), 33.87 (t, *J* = 25.1 Hz), 22.39 (t, *J* = 4.3 Hz), 20.16, 18.36.

**<sup>19</sup>F NMR** (376 MHz, CDCl<sub>3</sub>) δ -98.37 (dd, *J* = 271.9, 244.0 Hz).

**HRMS:** Calcd for C<sub>21</sub>H<sub>29</sub>F<sub>2</sub>N<sub>2</sub>O<sub>8</sub>S<sub>2</sub><sup>+</sup>[M+H]<sup>+</sup>: 539.1328, found: 539.1355

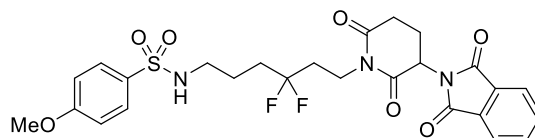

**3z**

**N-(6-(3-(1,3-dioxoisindolin-2-yl)-2,6-dioxopiperidin-1-yl)-4,4-difluorohexyl)-4-methoxybenzenesulfonamide**

Prepared by **General procedure E** on a 0.2 mmol scale and purified by flash chromatography on silica gel (PE/EtOAc = 1/1). Obtained as a colorless oil (66% yield), monofluorinated byproduct not detected.

**<sup>1</sup>H NMR** (400 MHz, CDCl<sub>3</sub>) δ 7.92 – 7.83 (m, 2H), 7.83 – 7.71 (m, 4H), 6.95 (d, *J* = 8.4 Hz, 2H), 5.06 – 4.95 (m, 1H), 4.81 (s, 1H), 4.06 – 3.89 (m, 2H), 3.84 (s, 3H), 3.05 – 2.89 (m, 3H), 2.86 – 2.67 (m, 2H), 2.16 – 1.98 (m, 3H), 1.91 – 1.77 (m, 2H), 1.70 – 1.57 (m, 2H).

**<sup>13</sup>C NMR** (101 MHz, CDCl<sub>3</sub>) δ 170.78, 168.51, 167.46, 162.87, 134.55, 131.69, 131.48, 129.18, 123.85 (t, *J* = 242.5 Hz), 123.83, 114.29, 55.63, 50.07, 42.53, 34.59 (t, *J* = 6.1 Hz), 34.09 (t, *J* = 25.3 Hz), 33.17 (t, *J* = 25.2 Hz), 31.88, 22.43 (t, *J* = 4.1 Hz), 21.94.

**<sup>19</sup>F NMR** (376 MHz, CDCl<sub>3</sub>) δ -98.13.

**HRMS:** Calcd for C<sub>26</sub>H<sub>28</sub>F<sub>2</sub>N<sub>3</sub>O<sub>7</sub>S<sup>+</sup>[M+H]<sup>+</sup>: 564.1611, found: 564.1599

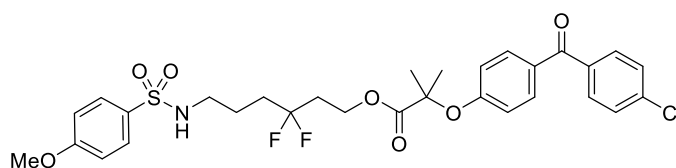

**3aa**

**3,3-difluoro-6-((4-methoxyphenyl)sulfonamido)hexyl 2-(4-(4-chlorobenzoyl)phenoxy)-2-methylpropanoate**

Prepared by **General procedure E** on a 0.2 mmol scale and purified by flash chromatography on silica gel (PE/EtOAc = 3/1). Obtained as a yellow oil (74% yield), as a 6.1:93.9 mixture of mono-/difluorinated product.

**<sup>1</sup>H NMR** (400 MHz, CDCl<sub>3</sub>) δ 7.78 (d, *J* = 8.4 Hz, 2H), 7.74 – 7.66 (m, 4H), 7.44 (d, *J* = 8.1 Hz, 2H), 6.97 (d, *J* = 8.4 Hz, 2H), 6.84 (d, *J* = 8.3 Hz, 2H), 4.85 (s, 1H), 4.32 (t, *J* = 6.6 Hz, 2H), 3.86 (s, 3H), 2.91 (q, *J* = 5.9 Hz, 2H), 2.09 (tt, *J* = 15.0, 6.3 Hz, 2H), 1.86 – 1.73 (m, 2H), 1.67 (s, 6H), 1.63 – 1.52 (m, 2H).

**<sup>13</sup>C NMR** (101 MHz, CDCl<sub>3</sub>) δ 194.48, 173.45, 162.92, 159.56, 138.59, 136.18, 132.05, 131.43, 131.28, 130.53, 129.18, 128.61, 123.32 (t, *J* = 241.6 Hz), 117.24, 114.30, 79.38 (t, *J* = 5.8 Hz), 59.53 (t, *J* = 5.8 Hz), 55.64, 42.54, 35.42 (t, *J* = 25.8 Hz), 33.68 (t, *J* = 25.1 Hz), 25.37, 22.41 (t, *J* = 4.0 Hz).

**<sup>19</sup>F NMR** (376 MHz, CDCl<sub>3</sub>) δ -98.02.

**HRMS:** Calcd for C<sub>30</sub>H<sub>33</sub>ClF<sub>2</sub>NO<sub>7</sub>S<sup>+</sup>[M+H]<sup>+</sup>: 624.1629, found: 624.1604

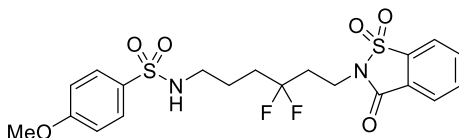

**3ab**

**N-(6-(1,1-dioxido-3-oxobenzo[d]isothiazol-2(3H)-yl)-4,4-difluorohexyl)-4-methoxybenzenesulfonamide**

Prepared by **General procedure E** on a 0.2 mmol scale and purified by flash chromatography on silica gel (PE/EtOAc = 3/1 to 1.5/1). Obtained as a white solid (71% yield), as a 0.7:99.3 mixture of mono-/difluorinated product.

**<sup>1</sup>H NMR** (400 MHz, DMSO-*d*<sub>6</sub>) δ 8.31 (d, *J* = 7.5 Hz, 1H), 8.11 (d, *J* = 7.5 Hz, 1H), 8.10 – 7.96 (m, 2H), 7.72 (d, *J* = 8.9 Hz, 2H), 7.50 (t, *J* = 5.9 Hz, 1H), 7.10 (d, *J* = 8.9 Hz, 2H), 3.86 (t, *J* = 7.6 Hz, 2H), 3.81 (s, 3H), 2.76 (q, *J* = 6.7 Hz, 2H), 2.33 (tt, *J* = 16.3, 7.8 Hz, 2H), 1.94 (tt, *J* = 17.2, 9.2 Hz, 2H), 1.58 – 1.47 (m, 2H).

**<sup>13</sup>C NMR** (101 MHz, DMSO-*d*<sub>6</sub>) δ 167.32, 163.43, 141.89, 141.05, 140.53, 137.38, 133.83, 131.52, 130.33, 129.48 (t, *J* = 240.6 Hz), 126.79, 119.54, 60.79, 47.19, 39.41 (t, *J* = 25.0 Hz), 37.98 (t, *J* = 24.3 Hz), 37.50 (t, *J* = 6.0 Hz), 27.25 (t, *J* = 4.0 Hz).

**<sup>19</sup>F NMR** (376 MHz, DMSO-*d*<sub>6</sub>) δ -97.69.

**HRMS**: Calcd for C<sub>20</sub>H<sub>23</sub>F<sub>2</sub>N<sub>2</sub>O<sub>6</sub>S<sub>2</sub><sup>+</sup>[M+H]<sup>+</sup>: 489.0960, found: 489.0978

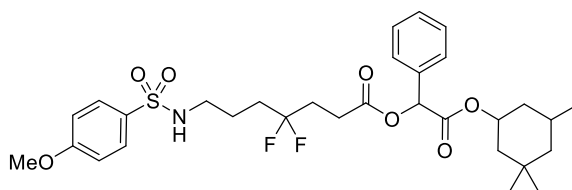

**3ac**

**2-oxo-1-phenyl-2-((3,3,5-trimethylcyclohexyl)oxy)ethyl 4,4-difluoro-7-((4-methoxyphenyl)sulfonamido)heptanoate**

Prepared by **General procedure E** on a 0.2 mmol scale and purified by flash chromatography on silica gel (PE/EtOAc = 5/1 to 4/1). Obtained as a colorless oil (87% yield) as a 1.3:98.7 mixture of mono-/difluorinated product.

**<sup>1</sup>H NMR** (400 MHz, CDCl<sub>3</sub>) δ 7.78 (d, *J* = 8.9 Hz, 2H), 7.47 – 7.41 (m, 2H), 7.41 – 7.35 (m, 3H), 6.96 (d, *J* = 8.9 Hz, 2H), 5.85 (s, 1H), 4.99 (t, *J* = 6.3 Hz, 1H), 4.91 (tt, *J* = 11.6, 4.4 Hz, 1H), 3.84 (s, 3H), 2.95 (q, *J* = 6.6 Hz, 2H), 2.74 – 2.54 (m, 2H), 2.18 (tt, *J* = 15.2, 7.1 Hz, 2H), 2.02 – 1.75 (m, 3H), 1.73 – 1.44 (m, 4H), 1.33 – 1.23 (m, 1H), 1.04 (dt, *J* = 63.2, 12.2 Hz, 1H), 0.93 – 0.64 (m, 11H).

**<sup>13</sup>C NMR** (101 MHz, CDCl<sub>3</sub>) δ 171.79, 168.33, 168.31, 162.91, 133.73, 133.71, 131.47, 129.22, 129.18, 128.79, 127.56, 127.54, 123.79 (t, *J* = 241.2 Hz), 114.32, 75.03, 75.01, 73.01, 55.63, 47.38, 43.62, 43.30, 42.57, 40.07, 39.72, 33.52 (t, *J* = 25.4 Hz), 32.95, 32.91, 32.30, 32.24, 31.62 (t, *J* = 25.9 Hz), 27.04, 27.00, 26.97, 25.43, 25.41, 22.39 (t, *J* = 4.2 Hz), 22.23, 22.19.

**<sup>19</sup>F NMR** (376 MHz, CDCl<sub>3</sub>) δ -100.21.

**HRMS:** Calcd for  $C_{31}H_{42}F_2NO_7S^+[M+H]^+$ : 610.2645, found: 610.2649

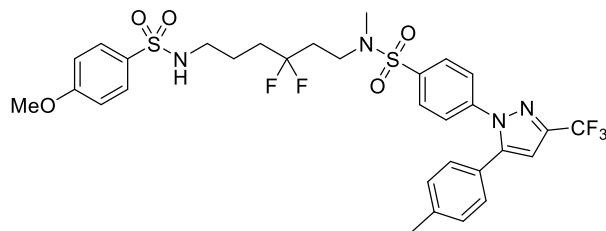

### 3ad

**N-(3,3-difluoro-6-((4-methoxyphenyl)sulfonamido)hexyl)-N-methyl-4-(5-(p-tolyl)-3-(trifluoromethyl)-1H-pyrazol-1-yl)benzenesulfonamide**

Prepared by **General procedure E** on a 0.2 mmol scale and purified by flash chromatography on silica gel (PE/EtOAc = 3/1 to 2/1). Obtained as a colorless oil (33% yield), monofluorinated byproduct not detected.

**<sup>1</sup>H NMR** (600 MHz,  $CDCl_3$ )  $\delta$  7.81 – 7.76 (m, 4H), 7.50 (d,  $J$  = 8.7 Hz, 2H), 7.17 (d,  $J$  = 7.9 Hz, 2H), 7.10 (d,  $J$  = 8.1 Hz, 2H), 6.98 (d,  $J$  = 8.9 Hz, 2H), 6.75 (s, 1H), 4.62 (t,  $J$  = 6.0 Hz, 1H), 3.87 (s, 3H), 3.19 (t,  $J$  = 7.6 Hz, 2H), 2.97 (q,  $J$  = 6.5 Hz, 2H), 2.75 (s, 3H), 2.38 (s, 3H), 2.15 – 2.05 (m, 2H), 1.94 – 1.83 (m, 2H), 1.69 – 1.64 (m, 2H).

**<sup>13</sup>C NMR** (101 MHz,  $CDCl_3$ )  $\delta$  162.96, 145.33, 144.17 (q,  $J$  = 38.3 Hz), 142.69, 139.89, 136.72, 131.35, 129.78, 129.19, 128.73, 128.37, 125.72, 123.61 (t,  $J$  = 242.6 Hz), 121.04 (q,  $J$  = 270.5 Hz), 114.34, 106.31 (d,  $J$  = 1.6 Hz), 106.31, 55.66, 44.31 (t,  $J$  = 5.3 Hz), 42.50, 35.32, 35.20 (t,  $J$  = 24.9 Hz), 33.50 (t,  $J$  = 25.1 Hz), 22.54 (t,  $J$  = 4.2 Hz), 21.34.

**<sup>19</sup>F NMR** (565 MHz,  $CDCl_3$ )  $\delta$  -62.46, -98.25.

**HRMS:** Calcd for  $C_{31}H_{34}F_5N_4O_5S_2^+[M+H]^+$ : 701.1885, found: 701.1891

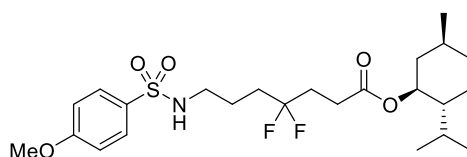

### 3ae

**(1S,2R,5S)-2-isopropyl-5-methylcyclohexyl 4,4-difluoro-7-((4-methoxyphenyl)sulfonamido)heptanoate**

Prepared by **General procedure E** on a 0.2 mmol scale and purified by flash chromatography on silica gel (PE/EtOAc = 4/1). Obtained as a colorless oil (72% yield), as a 5.8:94.2 mixture of mono-/difluorinated product.

**<sup>1</sup>H NMR** (400 MHz,  $CDCl_3$ )  $\delta$  7.79 (d,  $J$  = 8.2 Hz, 2H), 6.98 (d,  $J$  = 7.9 Hz, 2H), 4.75 – 4.55 (m, 2H), 3.87 (s, 3H), 2.97 (s, 2H), 2.46 (t,  $J$  = 7.5 Hz, 2H), 2.12 (tt,  $J$  = 15.8, 7.5 Hz, 2H), 2.00 – 1.92 (m, 1H), 1.92 – 1.76 (m, 3H), 1.73 – 1.61 (m, 4H), 1.54 – 1.41 (m, 1H), 1.36 (t,  $J$  = 11.2 Hz, 1H), 1.08 – 0.82 (m, 9H), 0.74 (d,  $J$  = 6.7 Hz, 3H).

**<sup>13</sup>C NMR** (101 MHz,  $CDCl_3$ )  $\delta$  171.93, 162.96, 131.36, 129.19, 123.92 (t,  $J$  = 241.2 Hz), 114.33,

74.68, 55.64, 46.95, 42.61, 40.82, 34.20, 33.60 (t,  $J = 25.4$  Hz), 31.85 (t,  $J = 25.7$  Hz), 31.37, 27.43 (t,  $J = 4.5$  Hz), 26.26, 23.40, 22.51 (t,  $J = 4.1$  Hz), 22.02, 20.76, 16.30.

$^{19}\text{F}$  NMR (376 MHz,  $\text{CDCl}_3$ )  $\delta$  -100.32.

HRMS: Calcd for  $\text{C}_{24}\text{H}_{38}\text{F}_2\text{NO}_5\text{S}^+[\text{M}+\text{H}]^+$ : 490.2433, found: 490.2410

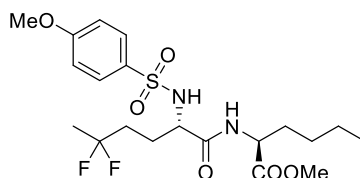

### 3af

**methyl (S)-2-((S)-5,5-difluoro-2-((4-methoxyphenyl)sulfonamido)hexanamido)hexanoate**

Prepared by **General procedure E** on a 0.2 mmol scale and purified by flash chromatography on silica gel (PE/EtOAc = 3.5/1 + 2% AcOH). Obtained as a white solid (60% yield) as a 3.8:96.2 mixture of mono-/difluorinated product.

$^1\text{H}$  NMR (400 MHz,  $\text{CDCl}_3$ )  $\delta$  7.77 (d,  $J = 8.3$  Hz, 2H), 6.94 (d,  $J = 8.3$  Hz, 2H), 6.35 (d,  $J = 6.1$  Hz, 1H), 5.56 (d,  $J = 8.7$  Hz, 1H), 4.35 (q,  $J = 7.0$  Hz, 1H), 3.84 (s, 3H), 3.82 – 3.74 (m, 1H), 3.71 (s, 3H), 2.01 – 1.61 (m, 6H), 1.55 (t,  $J = 18.5$  Hz, 3H), 1.28 – 1.20 (m, 2H), 1.16 – 1.01 (m, 2H), 0.86 (t,  $J = 7.3$  Hz, 3H).

$^{13}\text{C}$  NMR (101 MHz,  $\text{CDCl}_3$ )  $\delta$  172.39, 170.10, 163.13, 131.14, 129.40, 123.83 (t,  $J = 238.3$  Hz), 114.28, 55.76, 55.59, 52.46, 52.45, 33.42 (t,  $J = 25.6$  Hz), 31.76, 27.21, 26.88 (t,  $J = 4.2$  Hz), 23.55 (t,  $J = 27.8$  Hz), 22.13, 13.75.

$^{19}\text{F}$  NMR (376 MHz,  $\text{CDCl}_3$ )  $\delta$  -91.34 (dd,  $J = 257.2, 238.4$  Hz).

HRMS: Calcd for  $\text{C}_{20}\text{H}_{31}\text{F}_2\text{N}_2\text{O}_6\text{S}^+[\text{M}+\text{H}]^+$ : 465.1865, found: 465.1855

## 11.4 Other

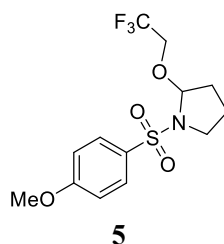

### **1-((4-methoxyphenyl)sulfonyl)-2-(2,2,2-trifluoroethoxy)pyrrolidine**

Prepared by **General procedure E** on a 0.2 mmol scale and purified by flash chromatography on silica gel (PE/EtOAc = 8/1). Obtained as a colorless oil (27% yield)

**<sup>1</sup>H NMR** (400 MHz, DMSO-*d*<sub>6</sub>) δ 7.79 (d, *J* = 8.9 Hz, 2H), 7.13 (d, *J* = 8.9 Hz, 2H), 5.34 (d, *J* = 5.1 Hz, 1H), 4.25 – 4.11 (m, 2H), 3.85 (s, 3H), 3.41 – 3.33 (m, 1H), 3.05 – 2.92 (m, 1H), 1.94 – 1.78 (m, 2H), 1.78 – 1.67 (m, 1H), 1.41 – 1.27 (m, 1H).

**<sup>13</sup>C NMR** (101 MHz, DMSO-*d*<sub>6</sub>) δ 163.30, 129.95, 129.40, 124.83 (q, *J* = 278.2 Hz), 115.09, 91.36, 64.07 (q, *J* = 33.4 Hz), 56.19, 48.07, 32.81, 22.99.

**<sup>19</sup>F NMR** (376 MHz, DMSO-*d*<sub>6</sub>) δ -72.75.

Data are consistent with reported in the literature<sup>12</sup>.

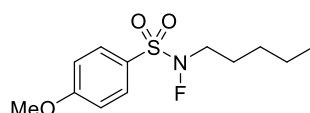

### **N-fluoro-4-methoxy-N-pentylbenzenesulfonamide**

Prepared on page S14. Obtained as a yellow oil (71% yield).

**<sup>1</sup>H NMR** (400 MHz, CDCl<sub>3</sub>) δ 7.86 (d, *J* = 8.9 Hz, 2H), 7.06 (d, *J* = 9.0 Hz, 2H), 3.90 (s, 3H), 3.19 (dt, *J* = 41.0, 7.0 Hz, 2H), 1.71 (p, *J* = 7.3 Hz, 2H), 1.43 – 1.25 (m, 4H), 0.89 (t, *J* = 7.1 Hz, 3H).

**<sup>13</sup>C NMR** (101 MHz, CDCl<sub>3</sub>) δ 164.75, 132.22, 123.06, 114.56, 55.82, 53.76 (d, *J* = 12.4 Hz), 28.73, 25.98, 22.20, 13.89.

**<sup>19</sup>F NMR** (376 MHz, CDCl<sub>3</sub>) δ -49.78.

Data are consistent with reported in the literature<sup>13</sup>.

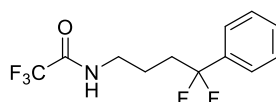

### **N-(4,4-difluoro-4-phenylbutyl)-2,2,2-trifluoroacetamide**

Prepared on page S20. Obtained as a white solid (52% yield).

**<sup>1</sup>H NMR** (400 MHz, CDCl<sub>3</sub>) δ 7.52 – 7.36 (m, 5H), 6.54 – 6.25 (m, 1H), 3.41 (q, *J* = 7.2 Hz, 2H), 2.18 (tt, *J* = 15.7, 7.6 Hz, 2H), 1.87 – 1.70 (m, 2H).

**<sup>13</sup>C NMR** (101 MHz, CDCl<sub>3</sub>) δ 157.36 (q, *J* = 37.3 Hz), 136.75 (t, *J* = 26.3 Hz), 129.99 (t, *J* = 1.3



Hz), 128.61, 124.79 (t,  $J = 6.3$  Hz), 122.53 (t,  $J = 242.5$  Hz), 115.78 (q,  $J = 288.4$  Hz), 39.31, 36.23 (t,  $J = 28.3$  Hz), 22.40 (t,  $J = 3.7$  Hz).

**$^{19}\text{F}$  NMR** (376 MHz,  $\text{CDCl}_3$ )  $\delta$  -75.93, -95.84.

**HRMS:** Calcd for  $\text{C}_{12}\text{H}_{13}\text{F}_5\text{NO}^+[\text{M}+\text{H}]^+$ : 282.0912, found: 282.0914

## 12. References

1. Y. Zhu, J. Shi and W. Yu, Photoinduced Site-Selective C(sp<sup>3</sup>)-H Chlorination of Aliphatic Amides, *Org. Lett.*, 2020, **22**, 8899-8903.
2. Z. Deng, Z. Zhao, G. He and G. Chen, Photoredox-Mediated Mono- and Difluorination of Remote Unactivated Methylene C(sp<sup>3</sup>)-H Bonds of N-Alkyl Sulfonamides, *Org. Lett.*, 2021, **23**, 3631-3635.
3. A. Modak, E. N. Pinter and S. P. Cook, Copper-Catalyzed, N-Directed Csp<sup>3</sup>-H Trifluoromethylthiolation (-SCF<sub>3</sub>) and Trifluoromethylselenation (-SeCF<sub>3</sub>), *J. Am. Chem. Soc.*, 2019, **141**, 18405-18410.
4. M. A. Cismesia and T. P. Yoon, Characterizing chain processes in visible light photoredox catalysis, *Chem. Sci.*, 2015, **6**, 5426-5434.
5. J. N. Demas, W. D. Bowman, E. F. Zalewski and R. A. Velapoldi, Determination of the quantum yield of the ferrioxalate actinometer with electrically calibrated radiometers, *J. Phys. Chem.*, 1981, **85**, 2766-2771.
6. T. Ankner and G. Hilmersson, Instantaneous Deprotection of Tosylamides and Esters with SmI<sub>2</sub>/Amine/Water, *Org. Lett.*, 2009, **11**, 503-506.
7. B. P. Babu, Y. Endo and J.-E. Bäckvall, Biomimetic Aerobic Oxidation of Amino Alcohols to Lactams, *Chem. Eur. J.*, 2012, **18**, 11524-11527.
8. E. F. Flegeau, J. M. Harrison and M. C. Willis, One-Pot Sulfonamide Synthesis Exploiting the Palladium-Catalyzed Sulfinylation of Aryl Iodides, *Synlett*, 2016, **27**, 101-105.
9. Q. Zhu, D. E. Graff and R. R. Knowles, Intermolecular Anti-Markovnikov Hydroamination of Unactivated Alkenes with Sulfonamides Enabled by Proton-Coupled Electron Transfer, *J. Am. Chem. Soc.*, 2018, **140**, 741-747.
10. C.-Y. Wang, Z.-Y. Qin, Y.-L. Huang, Y.-M. Hou, R.-X. Jin, C. Li and X.-S. Wang, Enantioselective Copper-Catalyzed Remote C(sp<sup>3</sup>)-H Alkynylation of Linear Primary Sulfonamides, *Org. Lett.*, 2020, **22**, 4006-4009.
11. H. Jiang, X. Tang, Z. Xu, H. Wang, K. Han, X. Yang, Y. Zhou, Y.-L. Feng, X.-Y. Yu and Q. Gui, TBAI-catalyzed selective synthesis of sulfonamides and β-aryl sulfonyl enamines: coupling of arenesulfonyl chlorides and sodium sulfinates with tert-amines, *Org. Biomol. Chem.*, 2019, **17**, 2715-2720.
12. L. F. T. Novaes, J. S. K. Ho, K. Mao, K. Liu, M. Tanwar, M. Neurock, E. Villemure, J. A. Terrett and S. Lin, Exploring Electrochemical C(sp<sup>3</sup>)-H Oxidation for the Late-Stage Methylation of Complex Molecules, *J. Am. Chem. Soc.*, 2022, **144**, 1187-1197.
13. Z. Liu, H. Xiao, B. Zhang, H. Shen, L. Zhu and C. Li, Copper-Catalyzed Remote C(sp<sup>3</sup>)-H Trifluoromethylation of Carboxamides and Sulfonamides, *Angew. Chem. Int. Ed.*, 2019, **58**, 2510-2513.

### 13. NMR Spectra

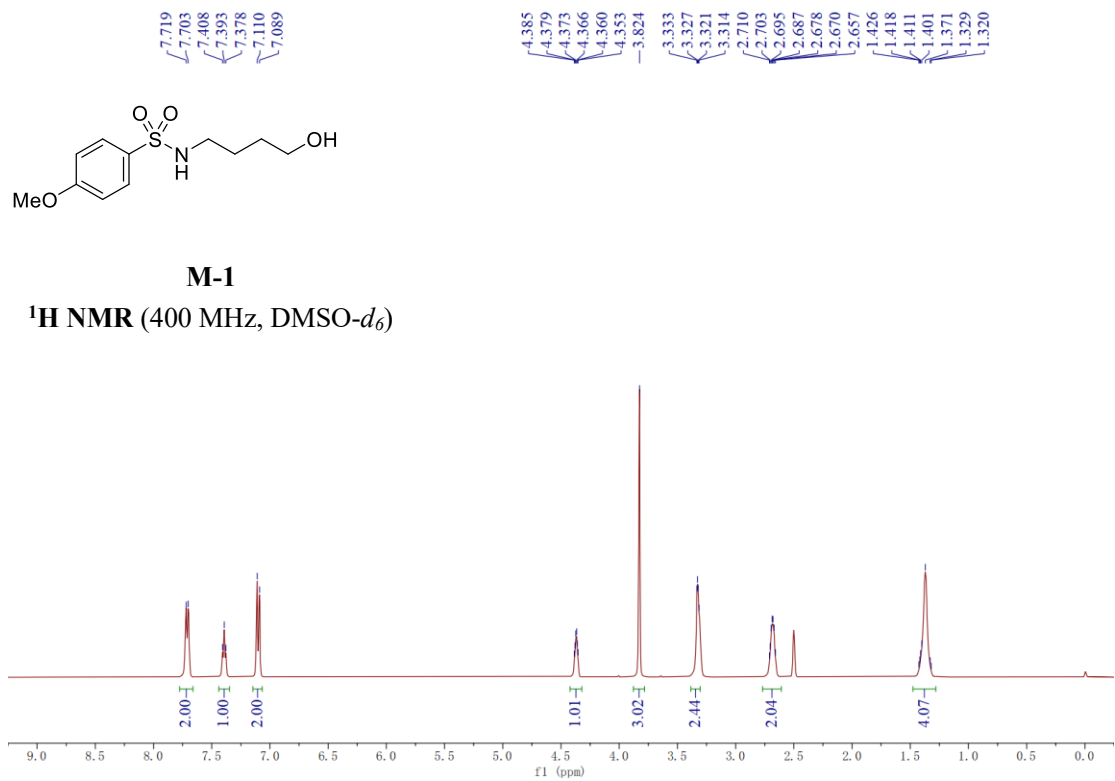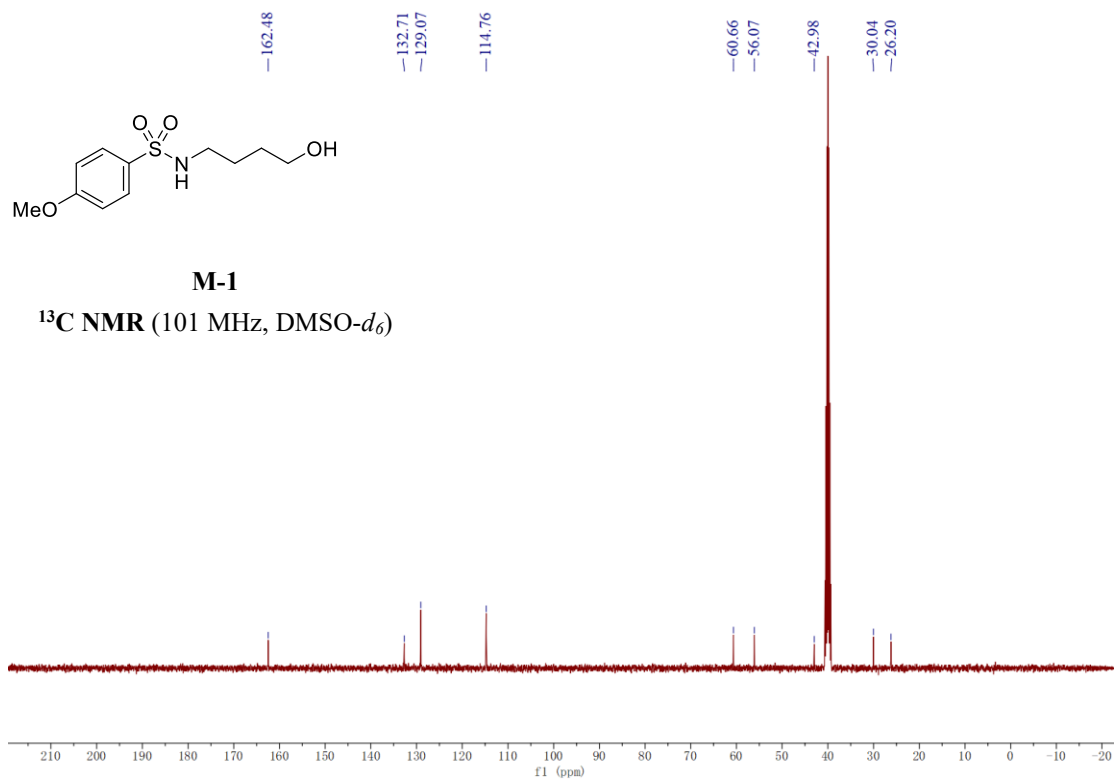

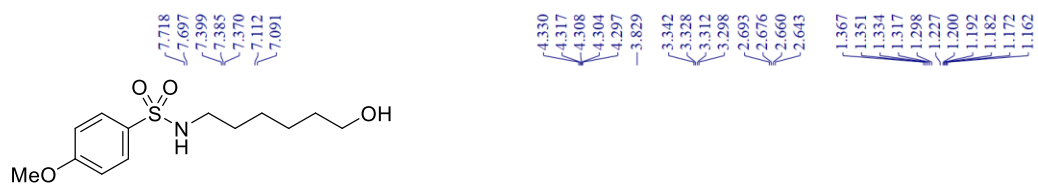

## M-2

$^1\text{H}$  NMR (400 MHz,  $\text{DMSO}-d_6$ )

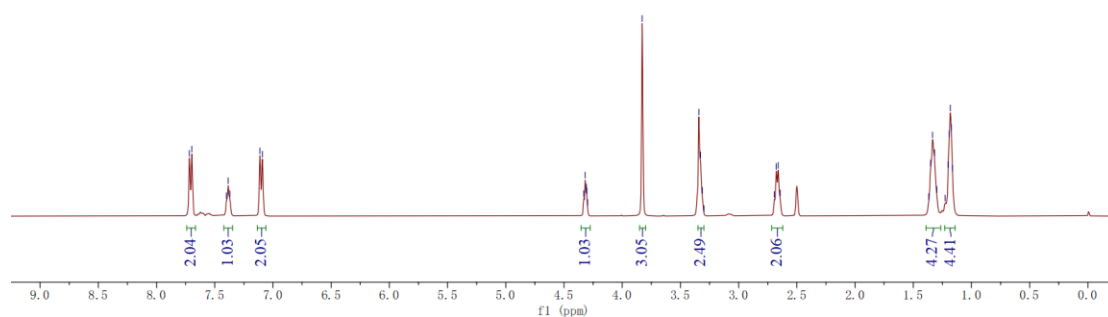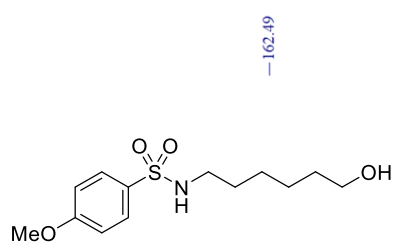

## M-2

$^{13}\text{C}$  NMR (101 MHz,  $\text{DMSO}-d_6$ )

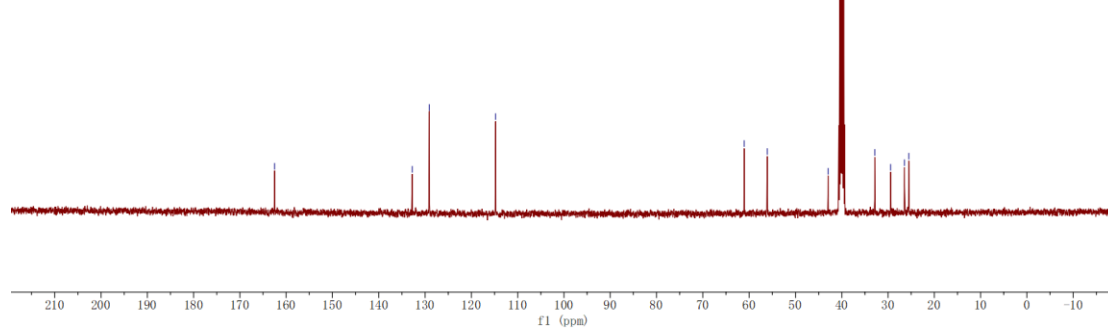

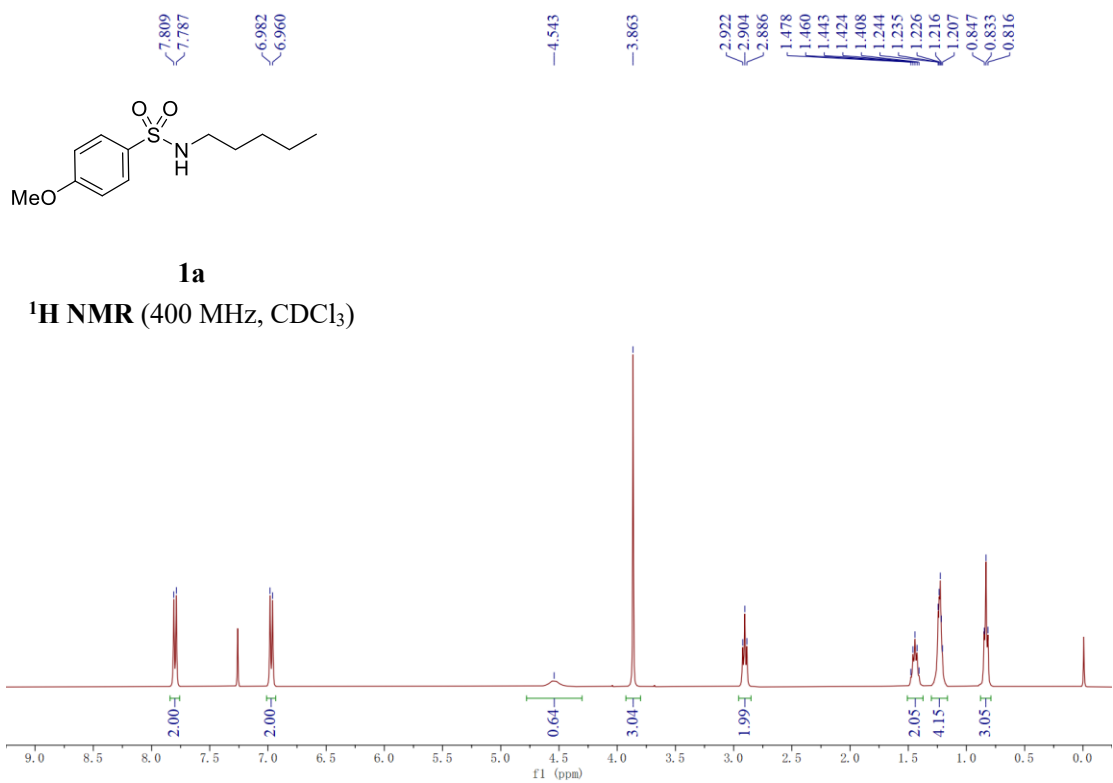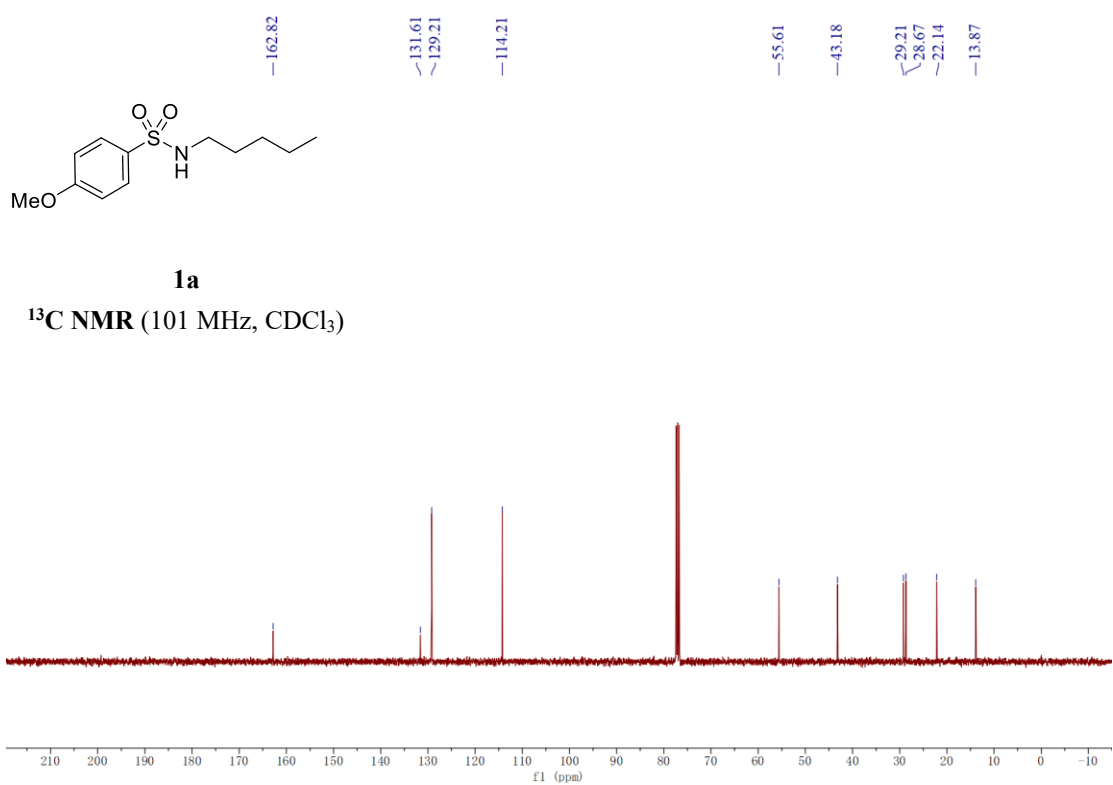

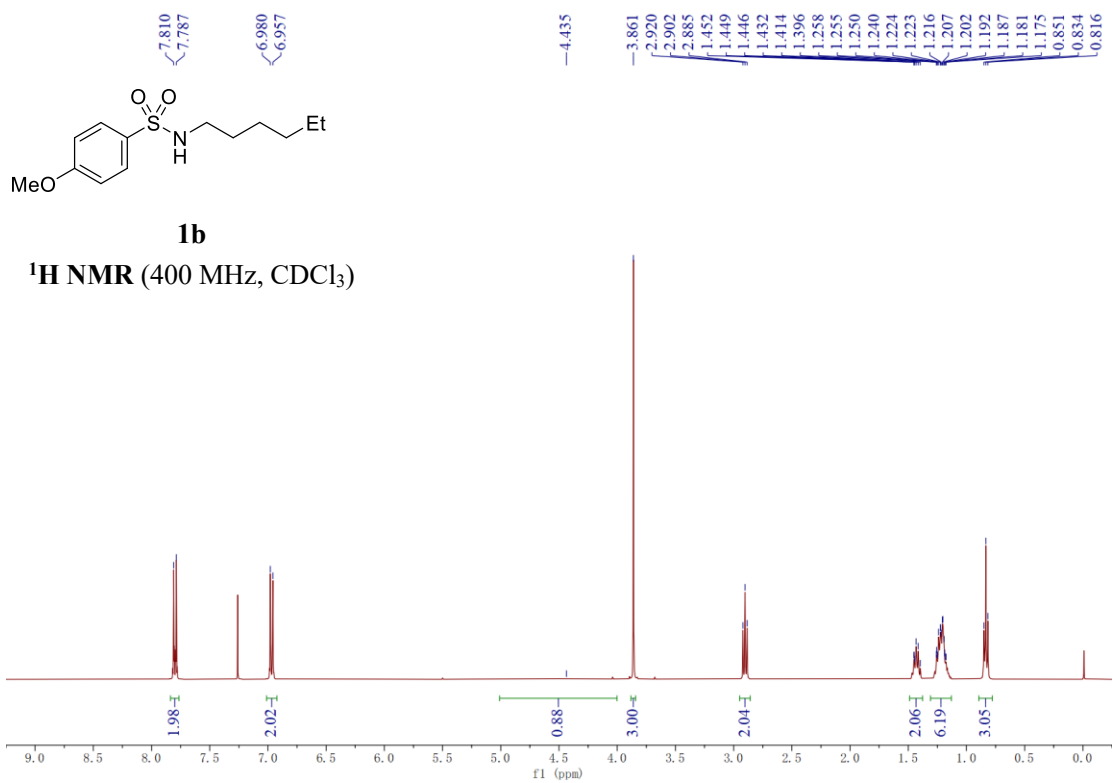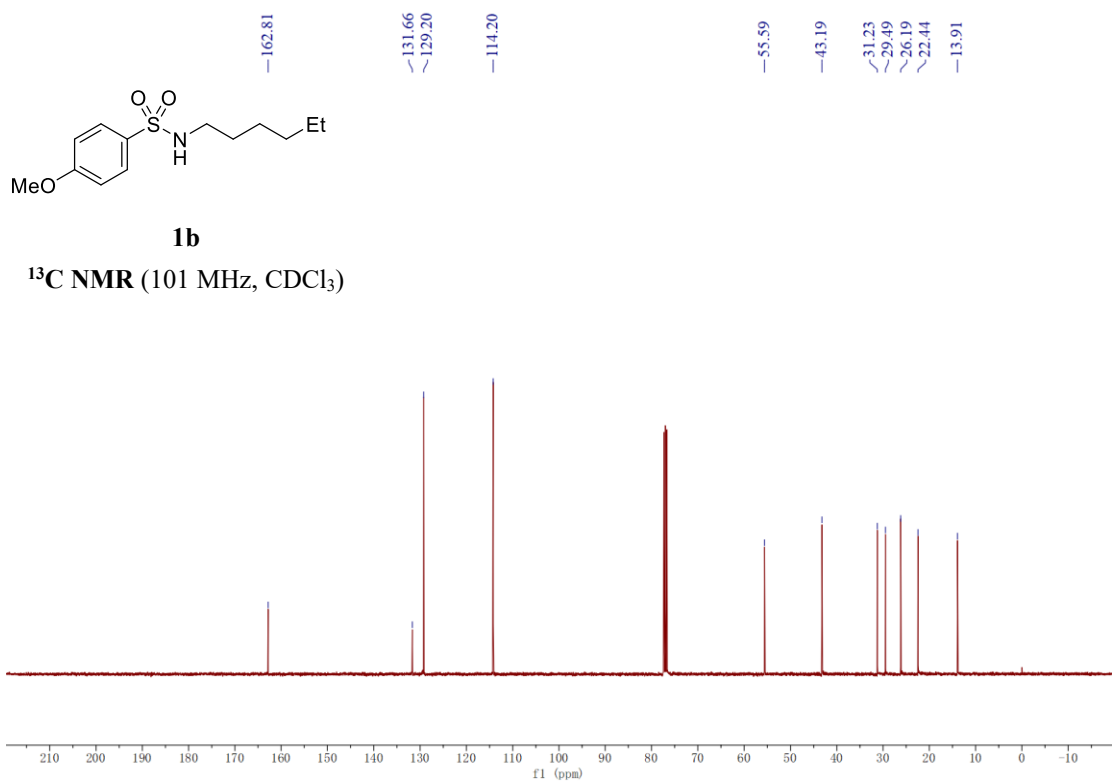

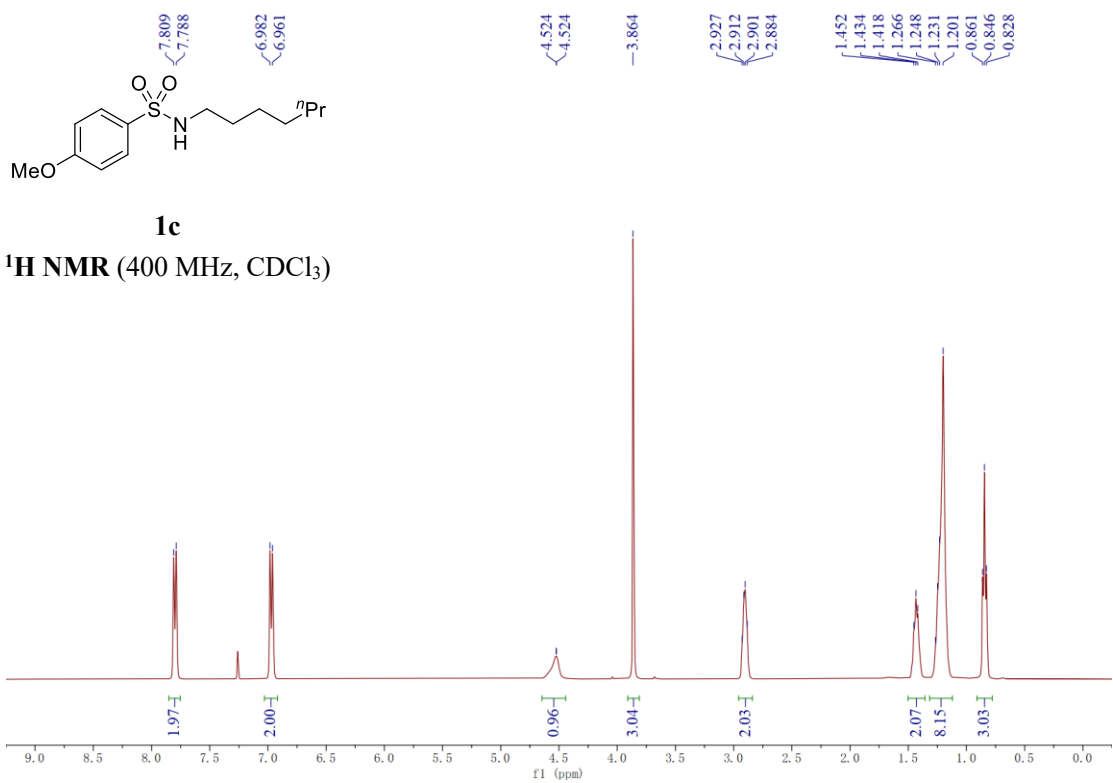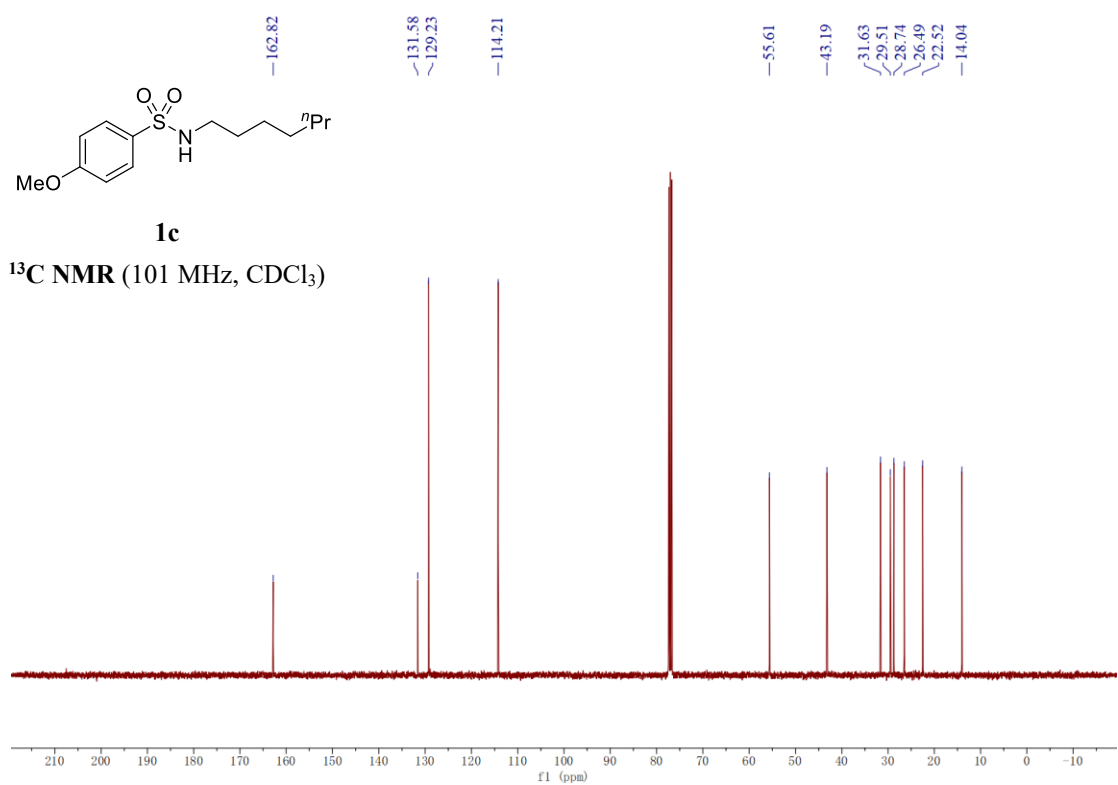

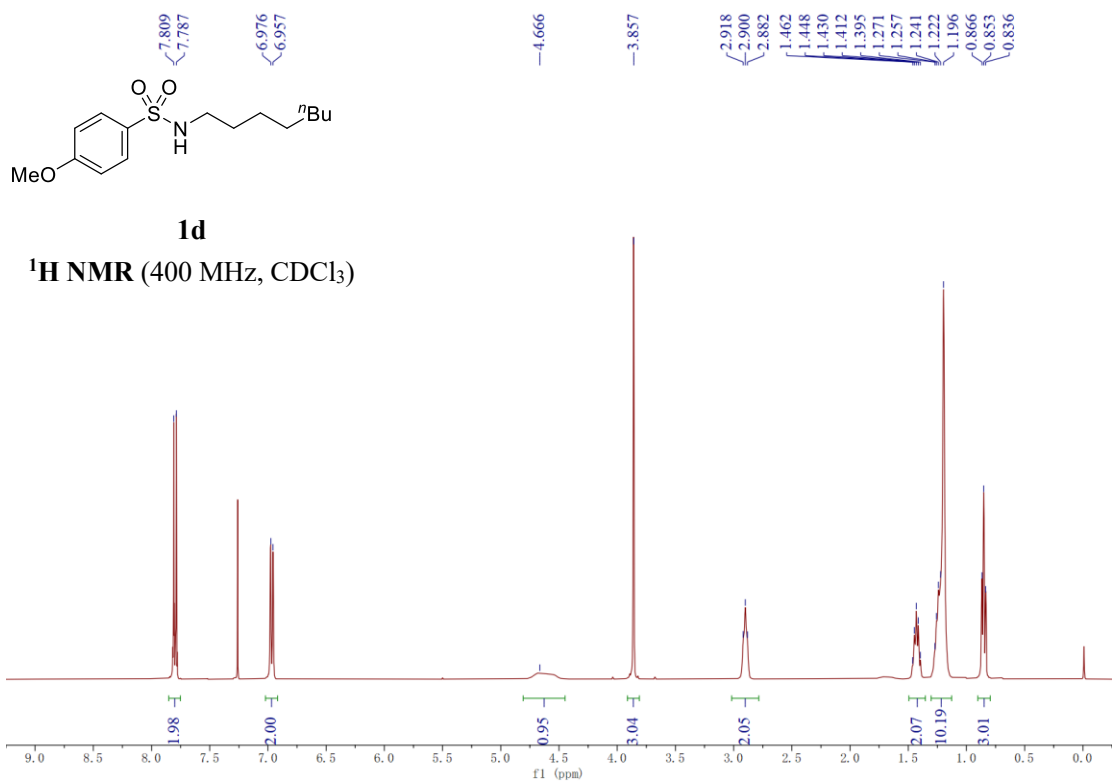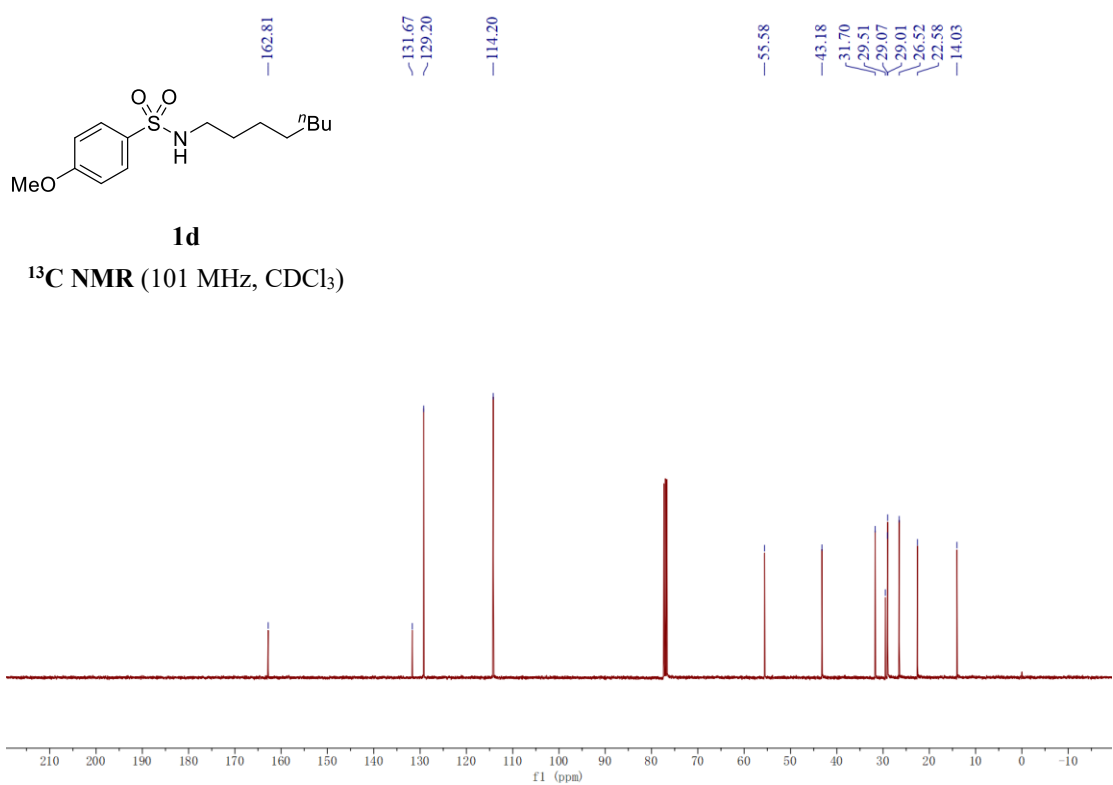



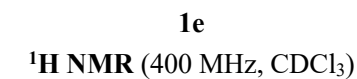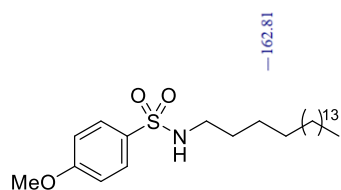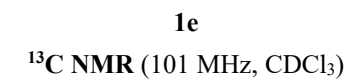

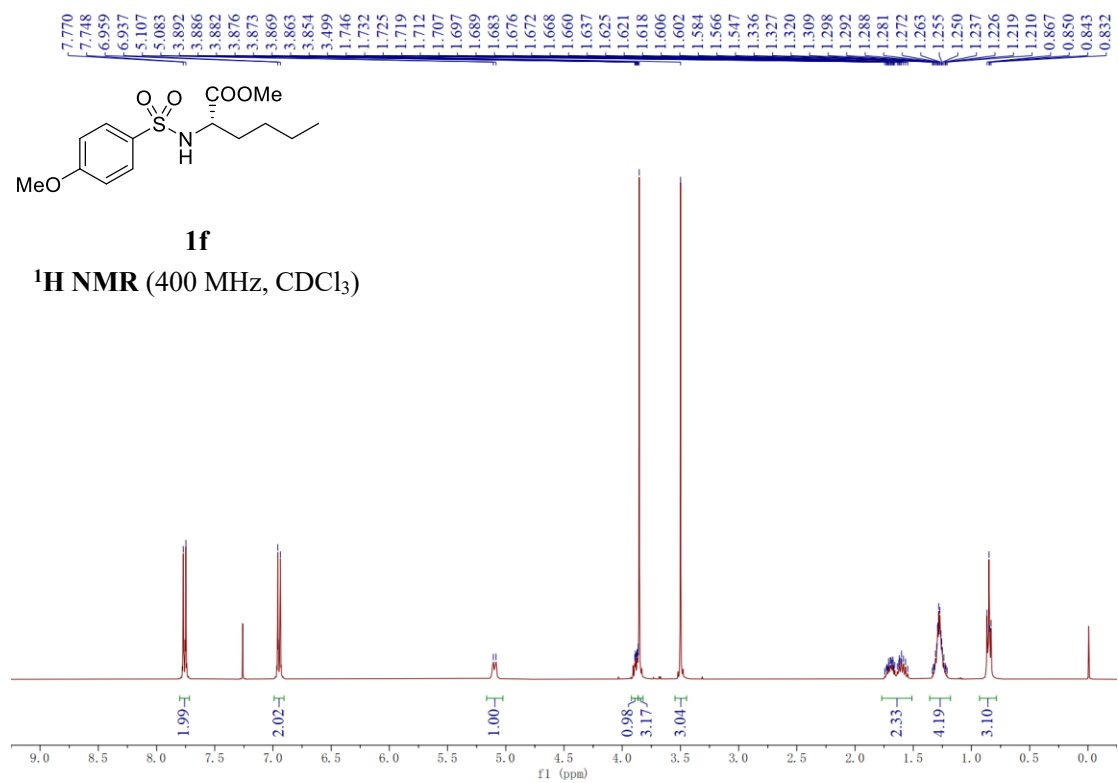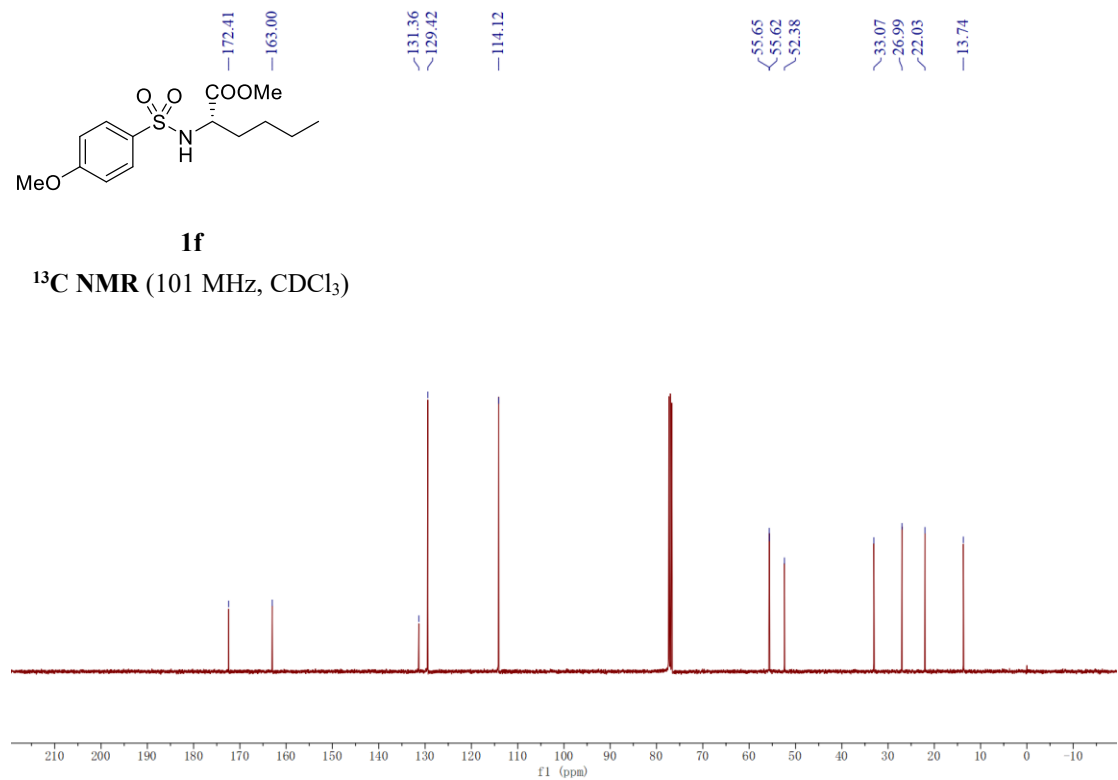

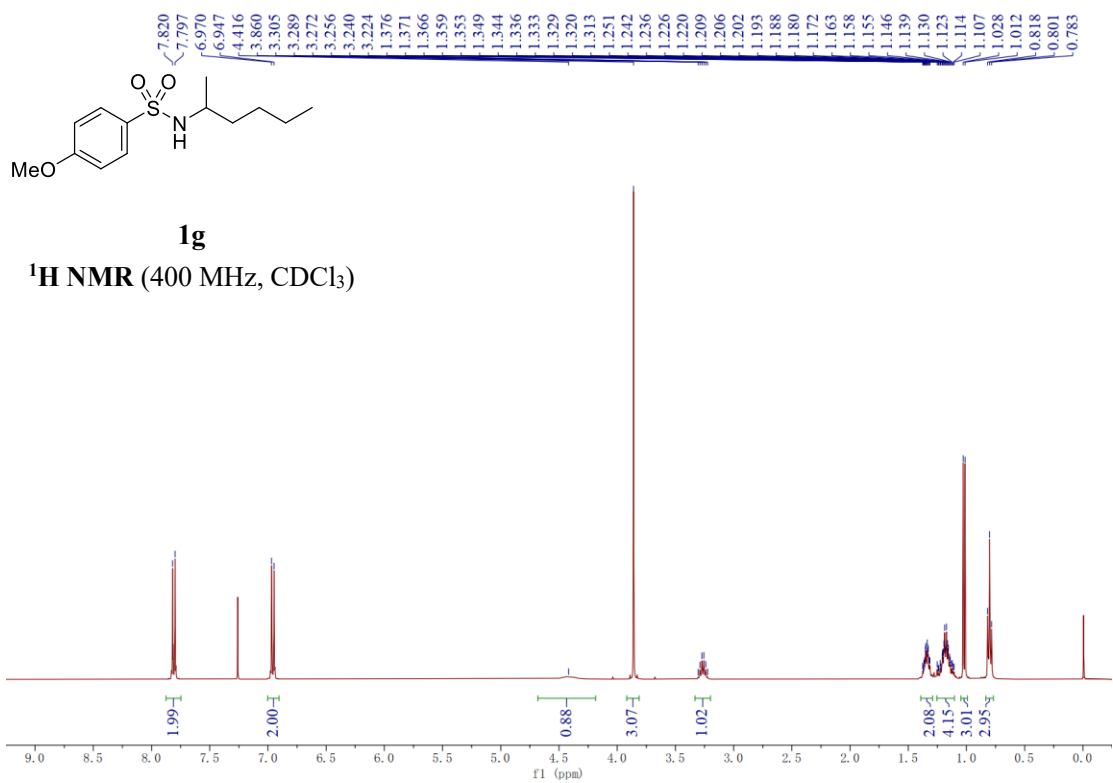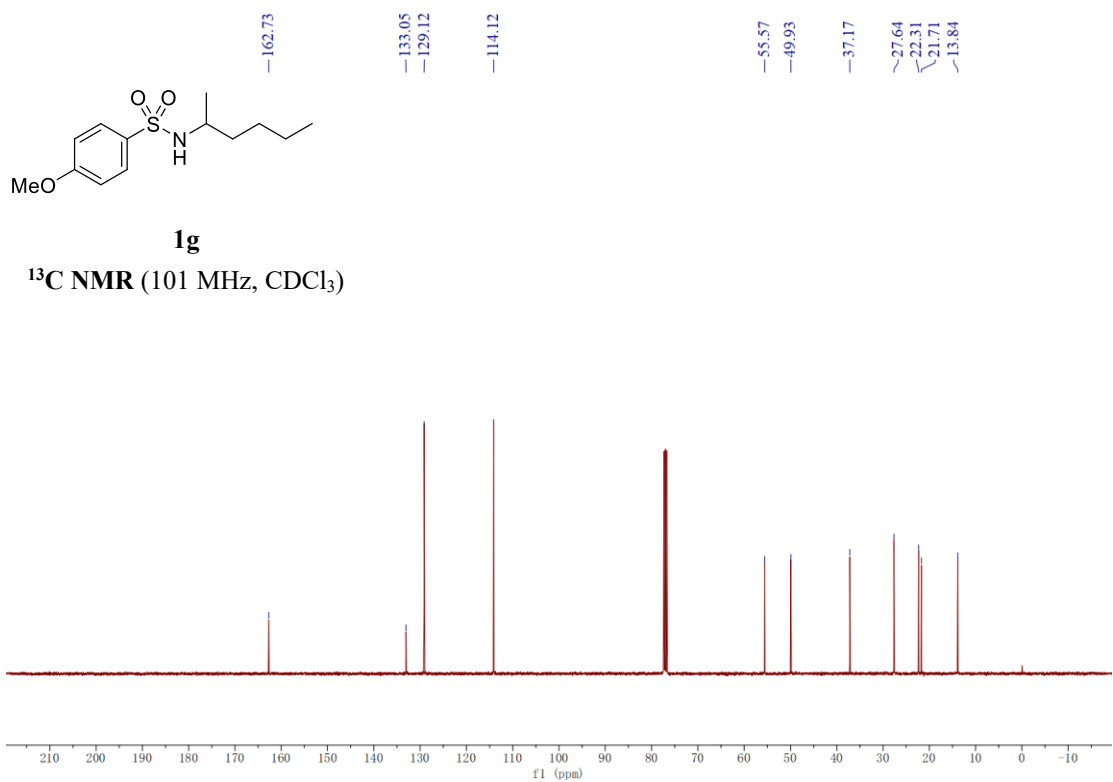

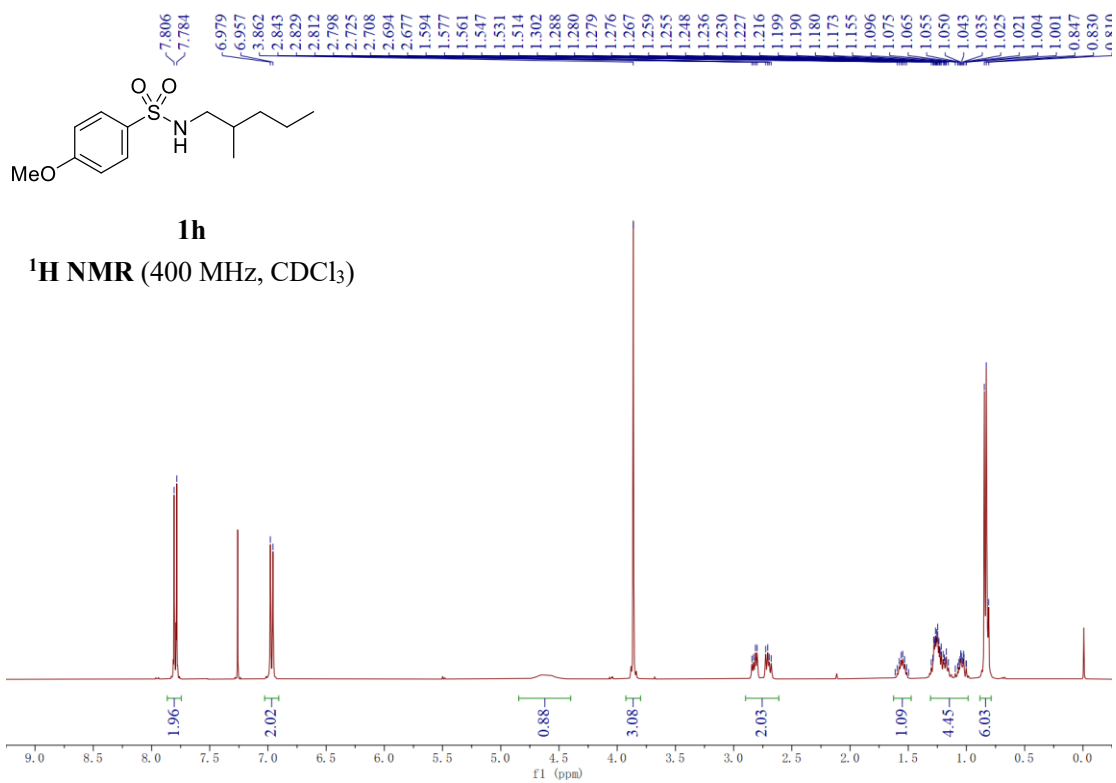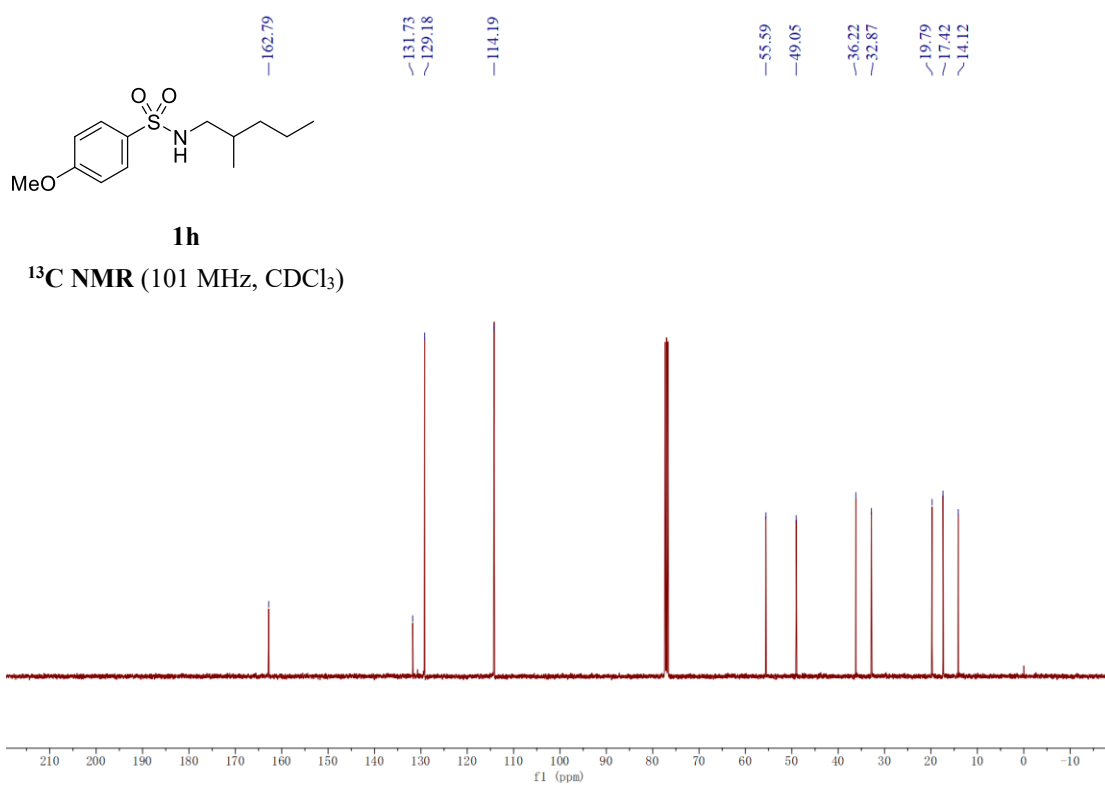

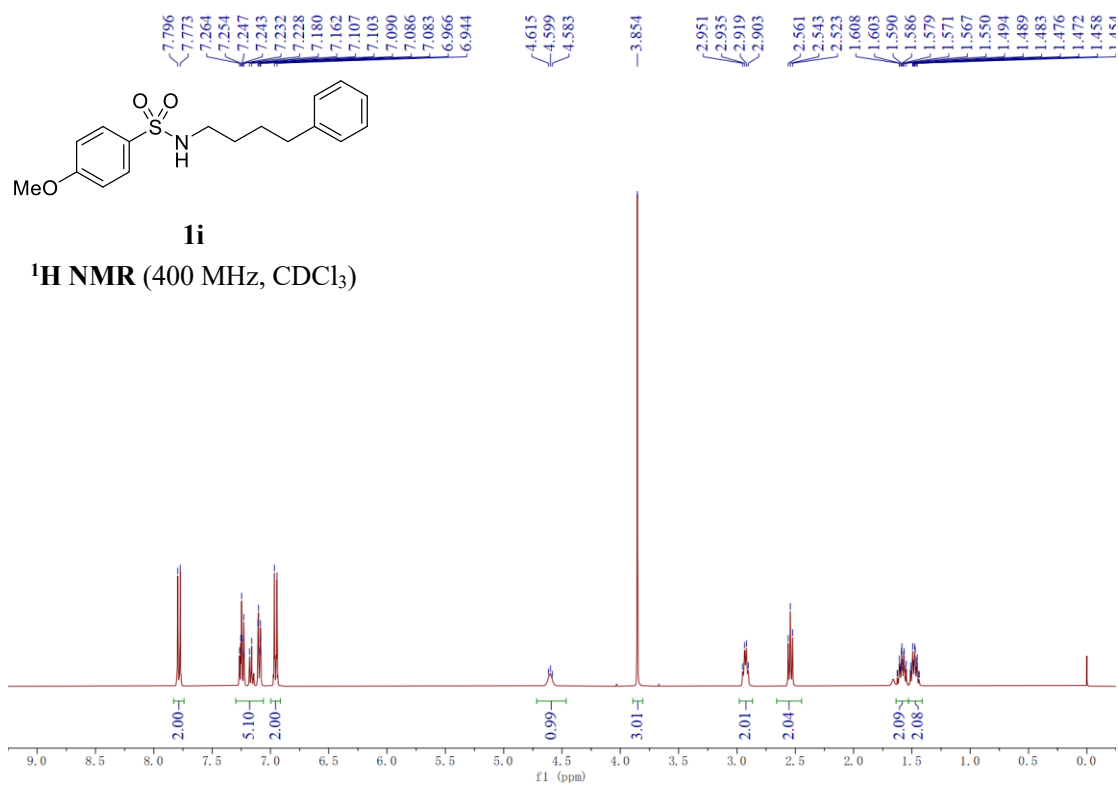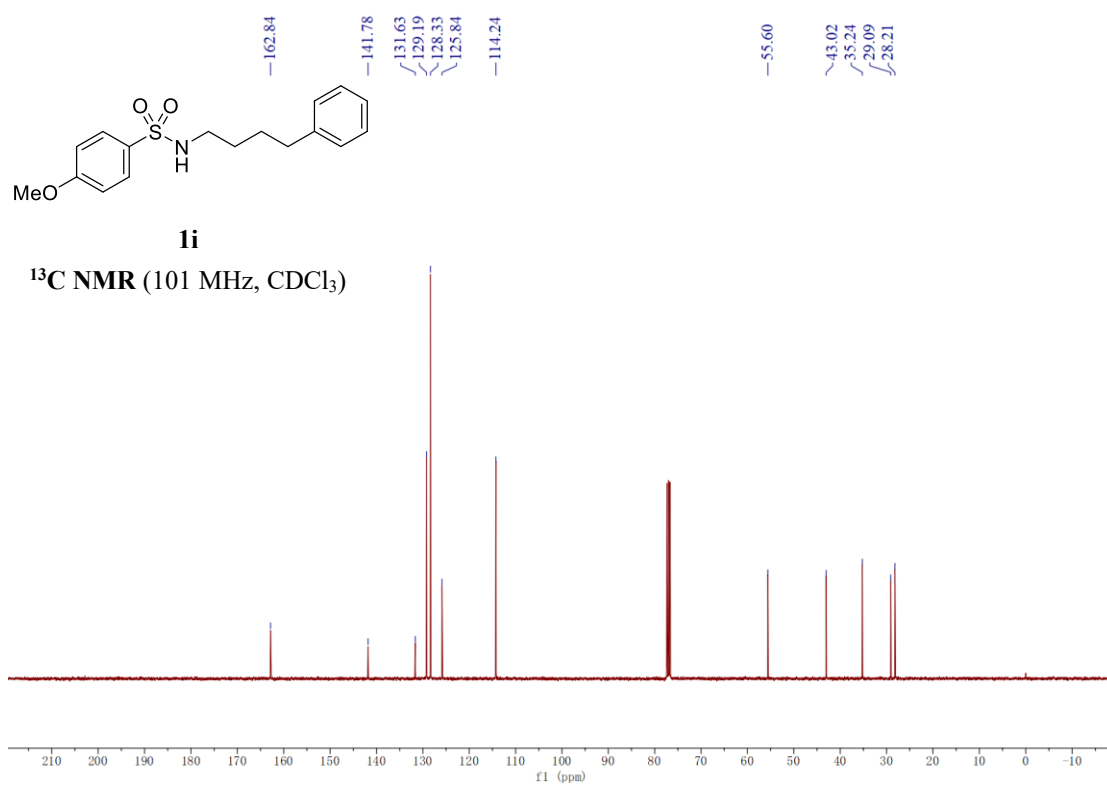

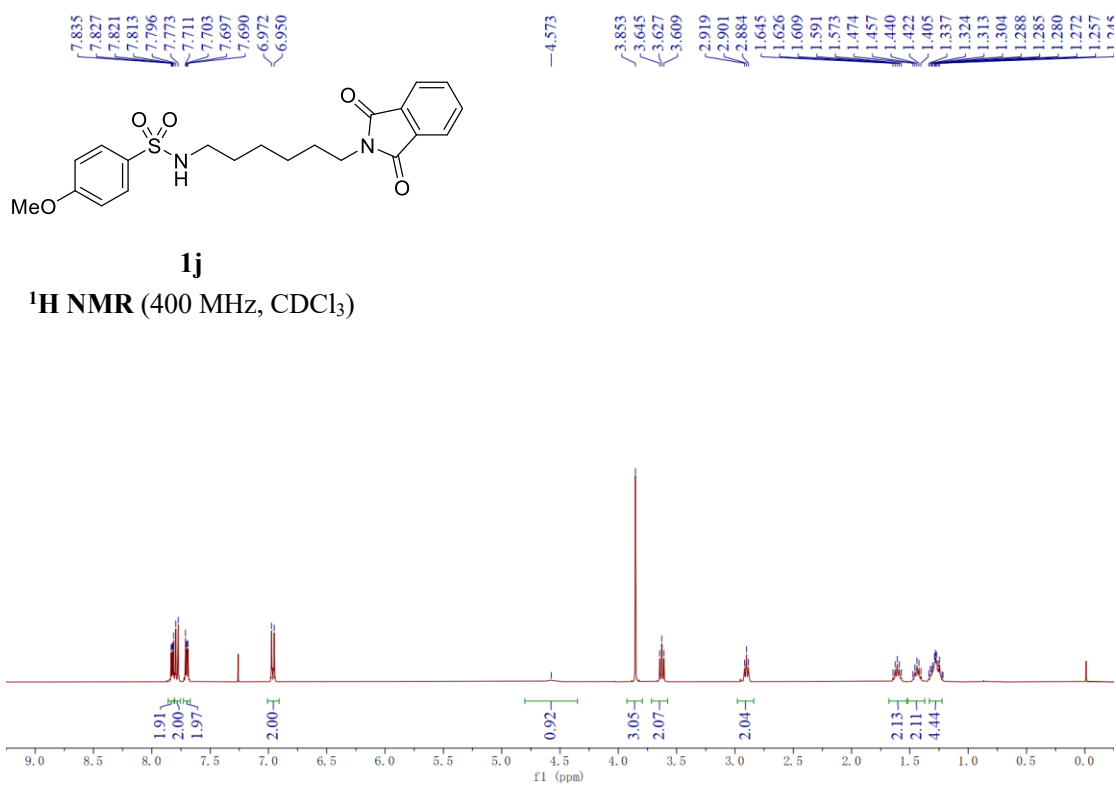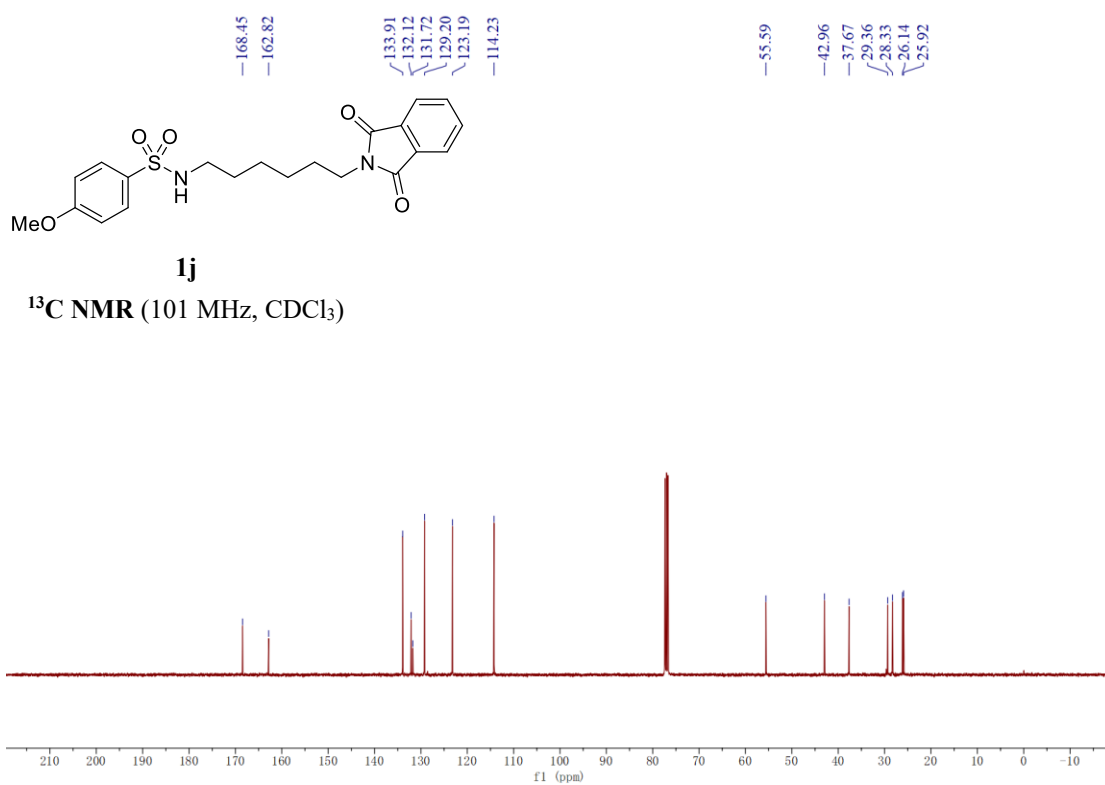

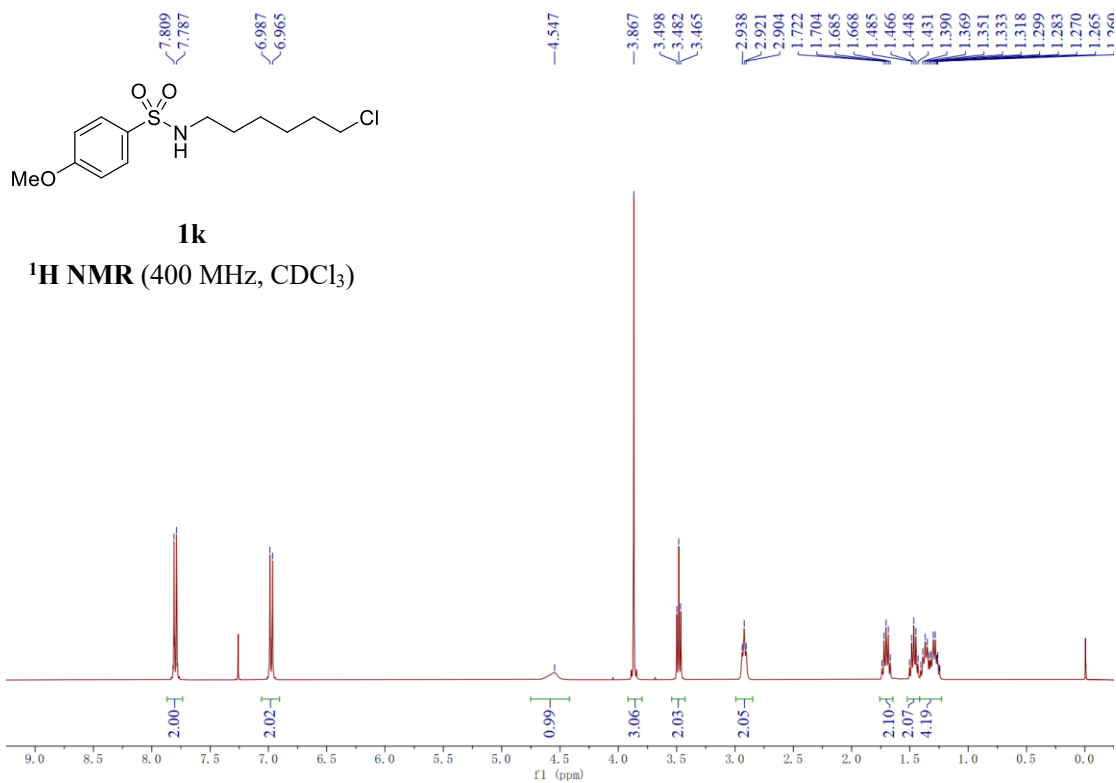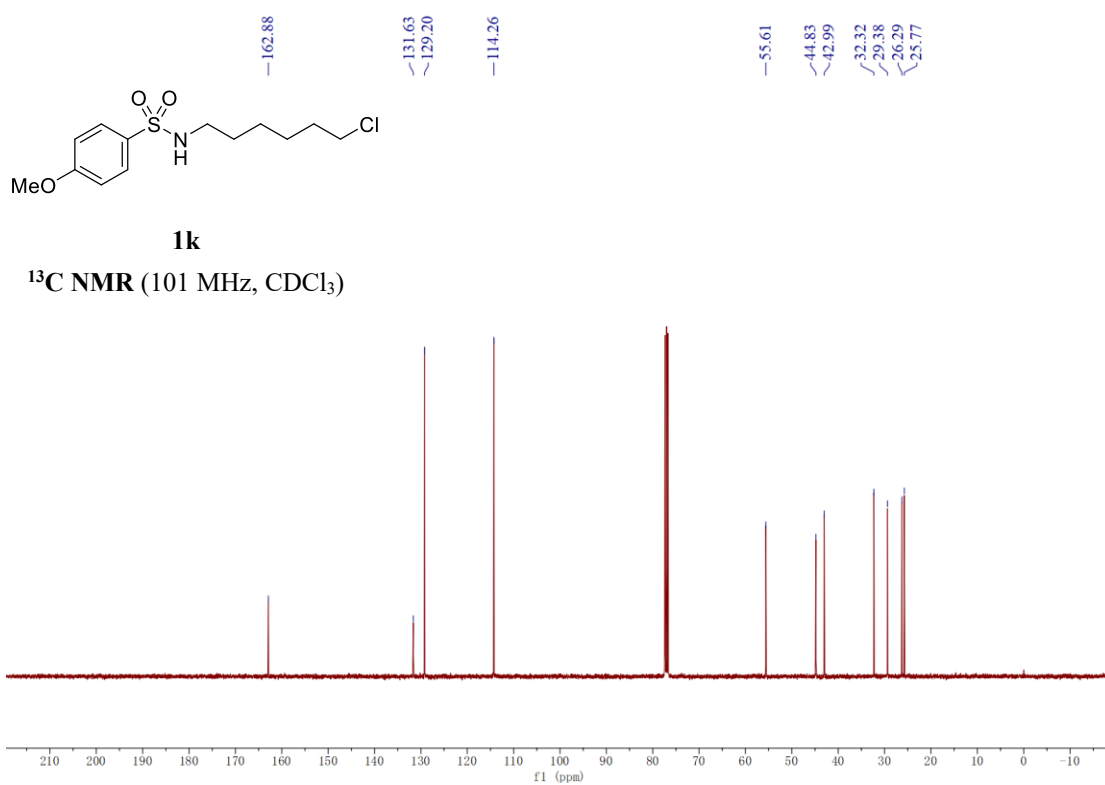

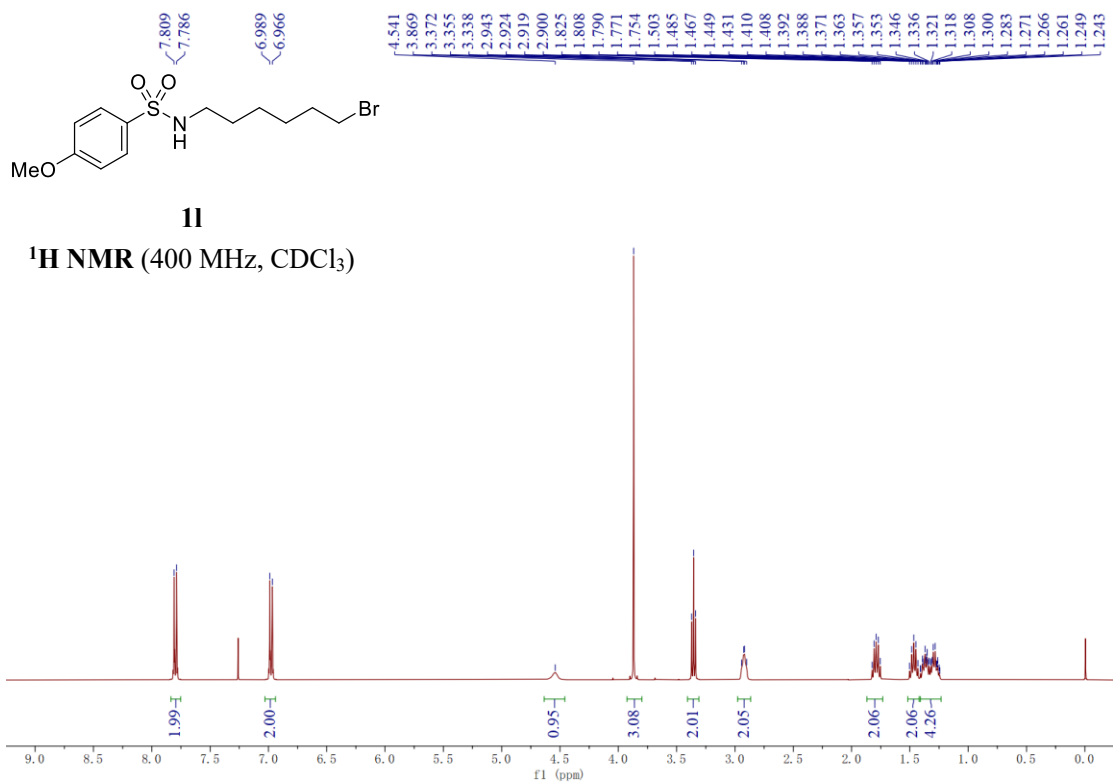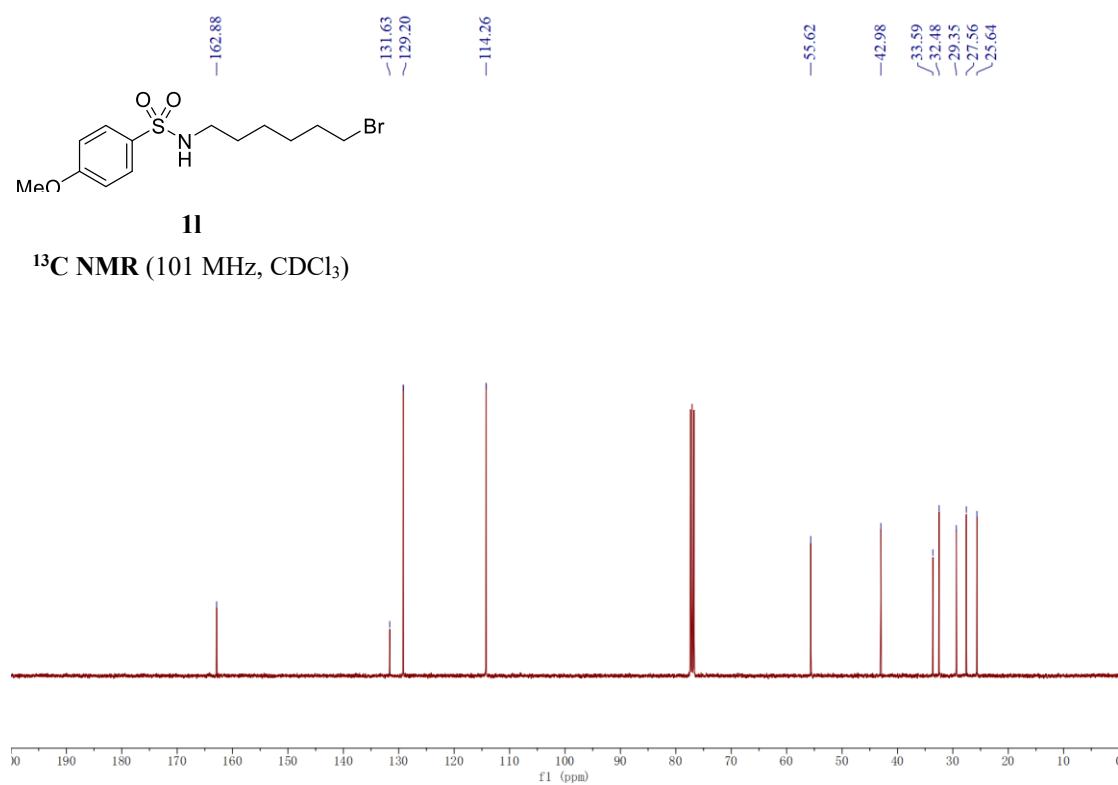



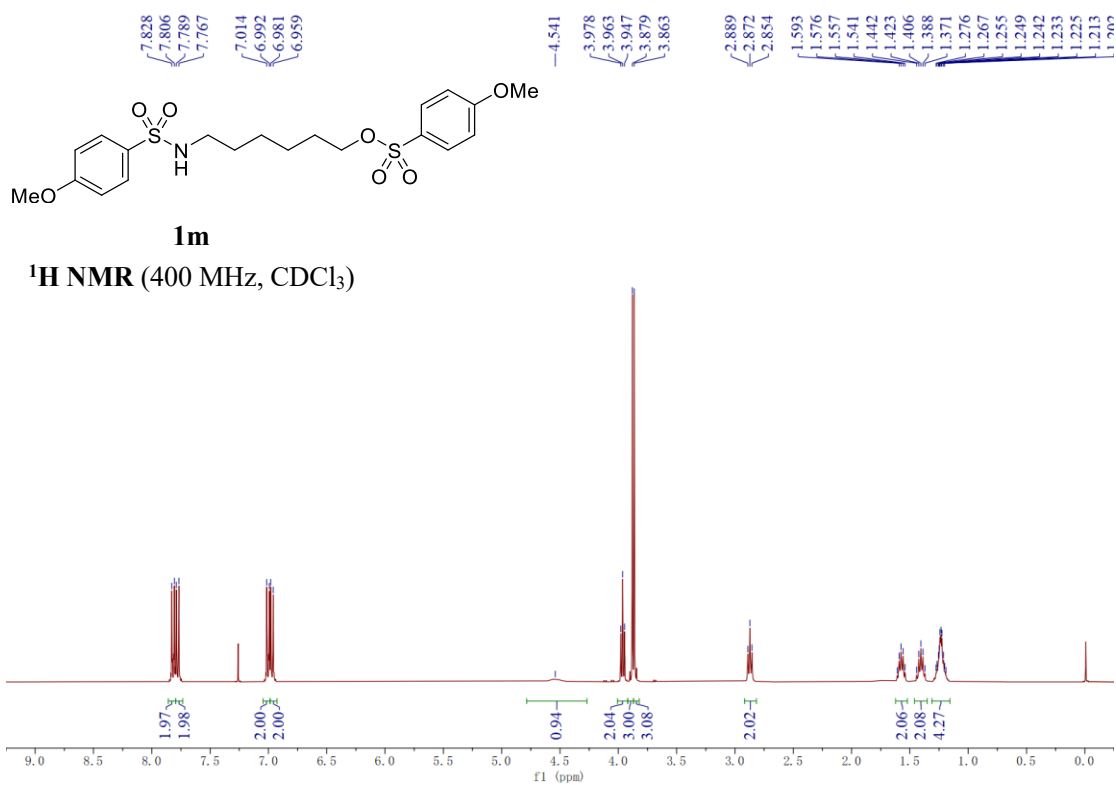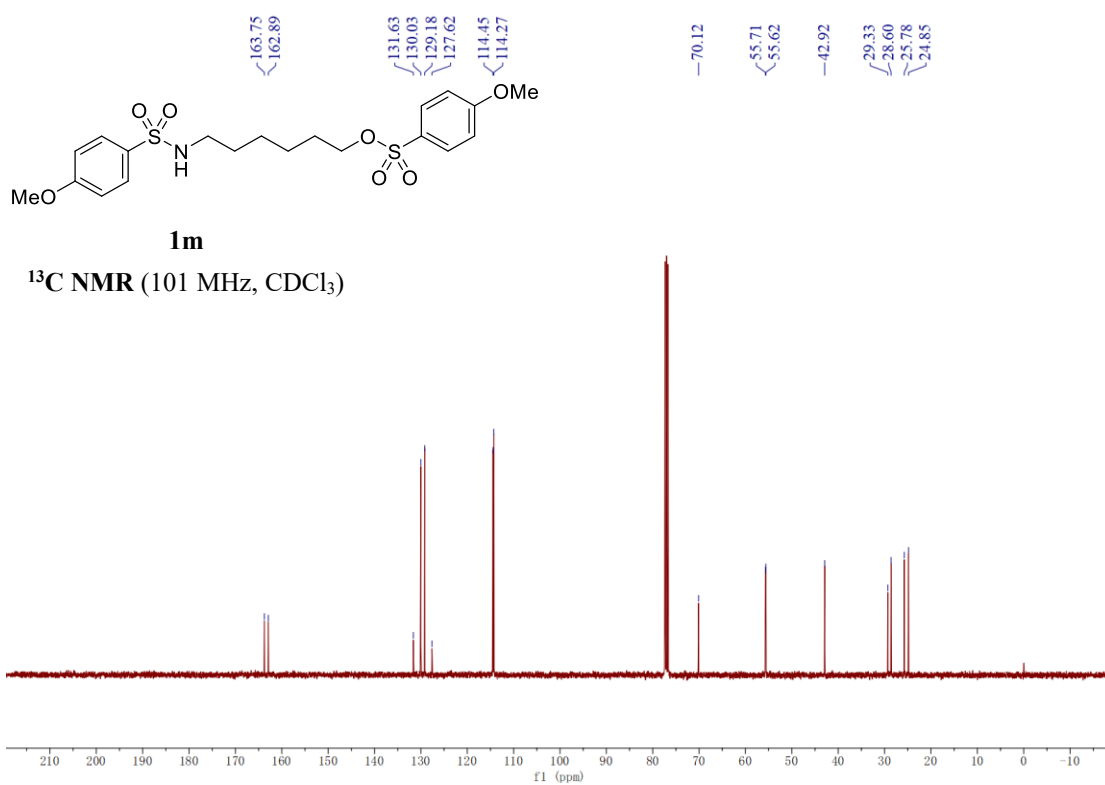

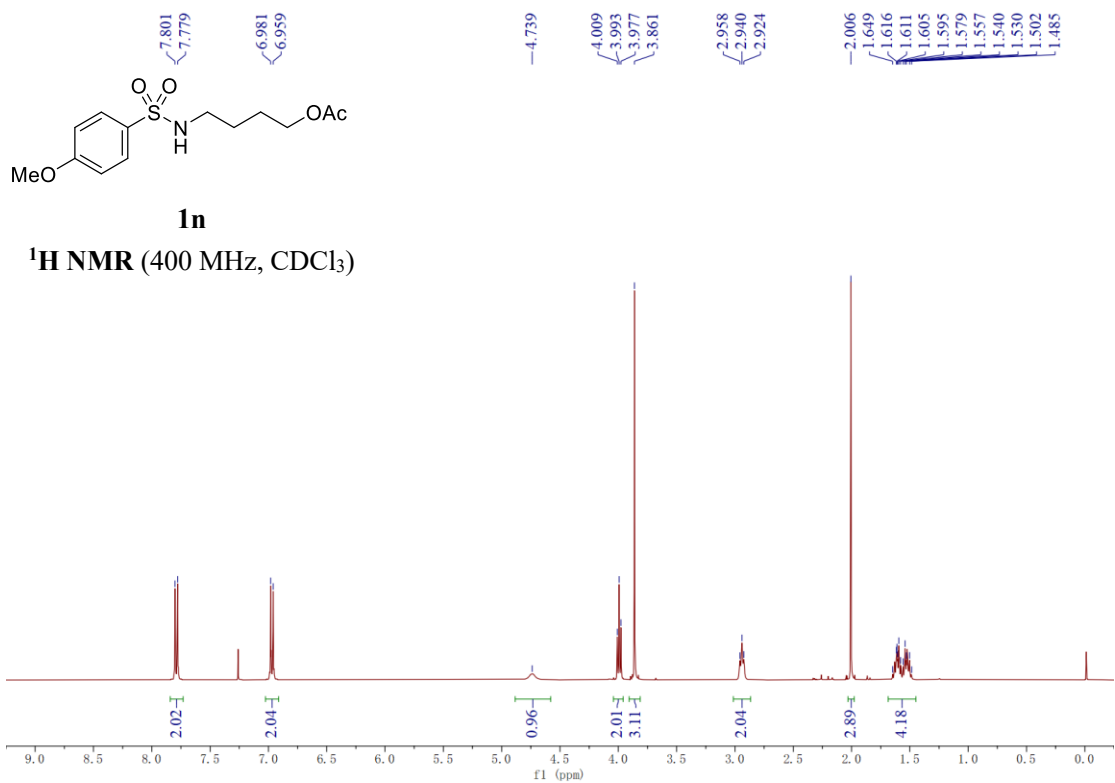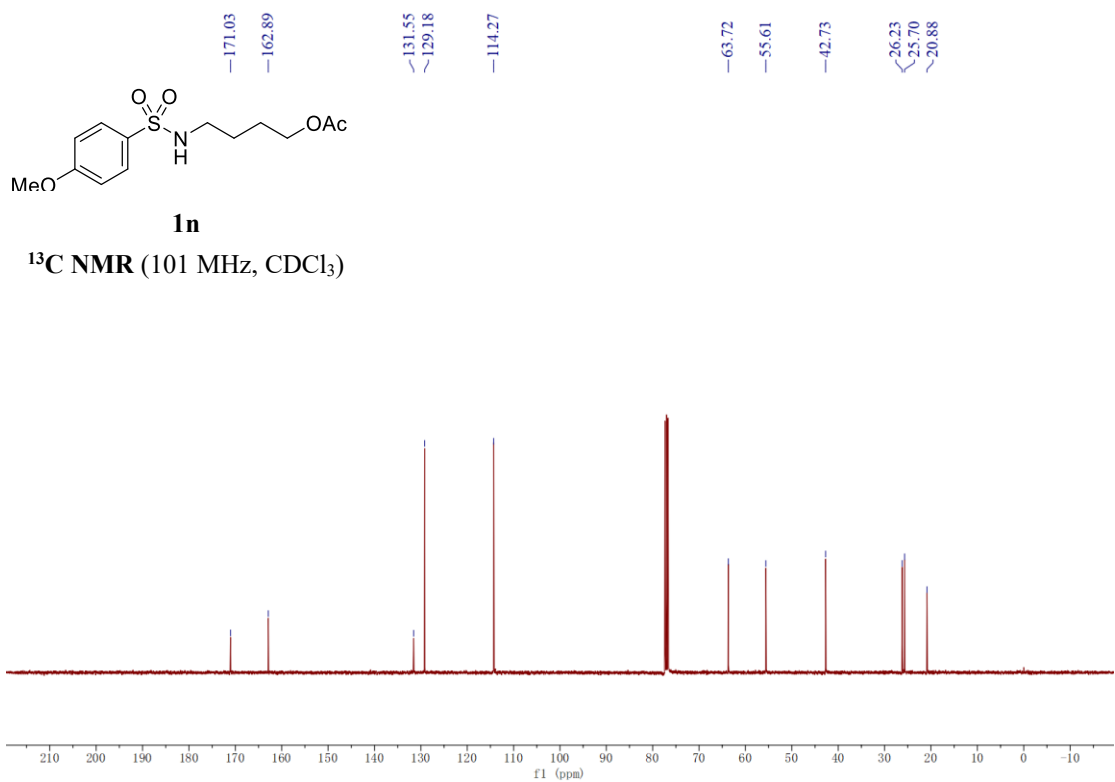

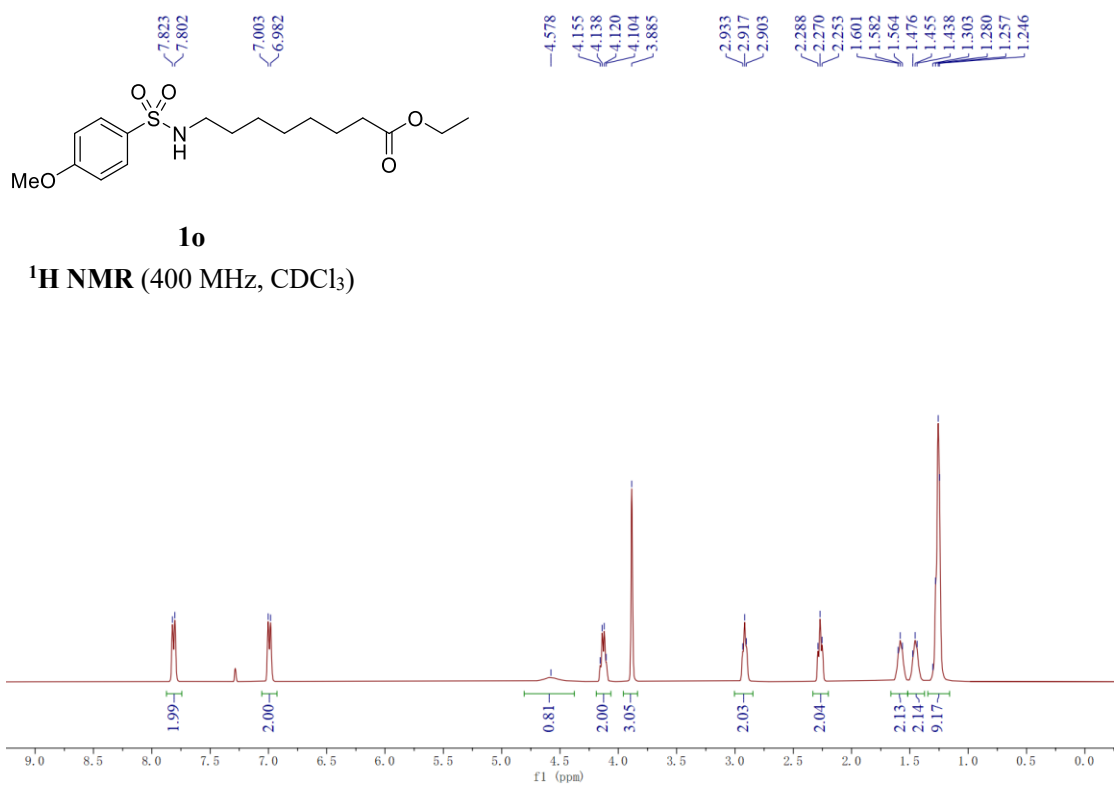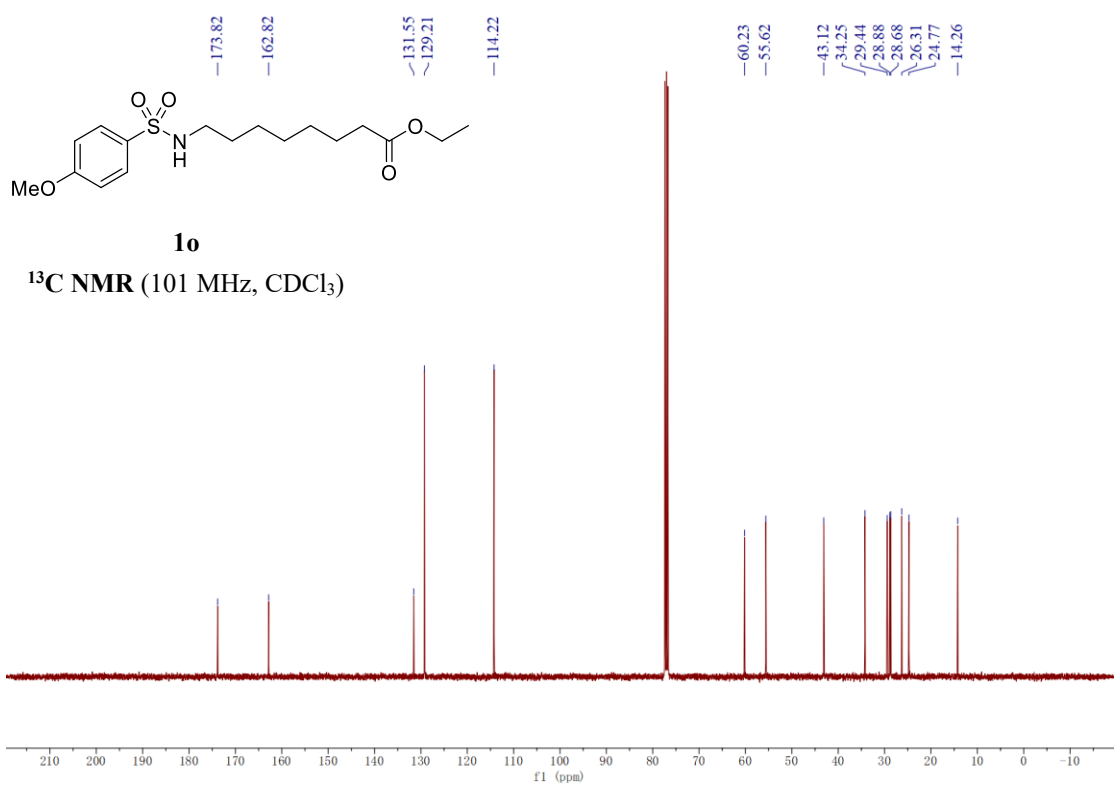

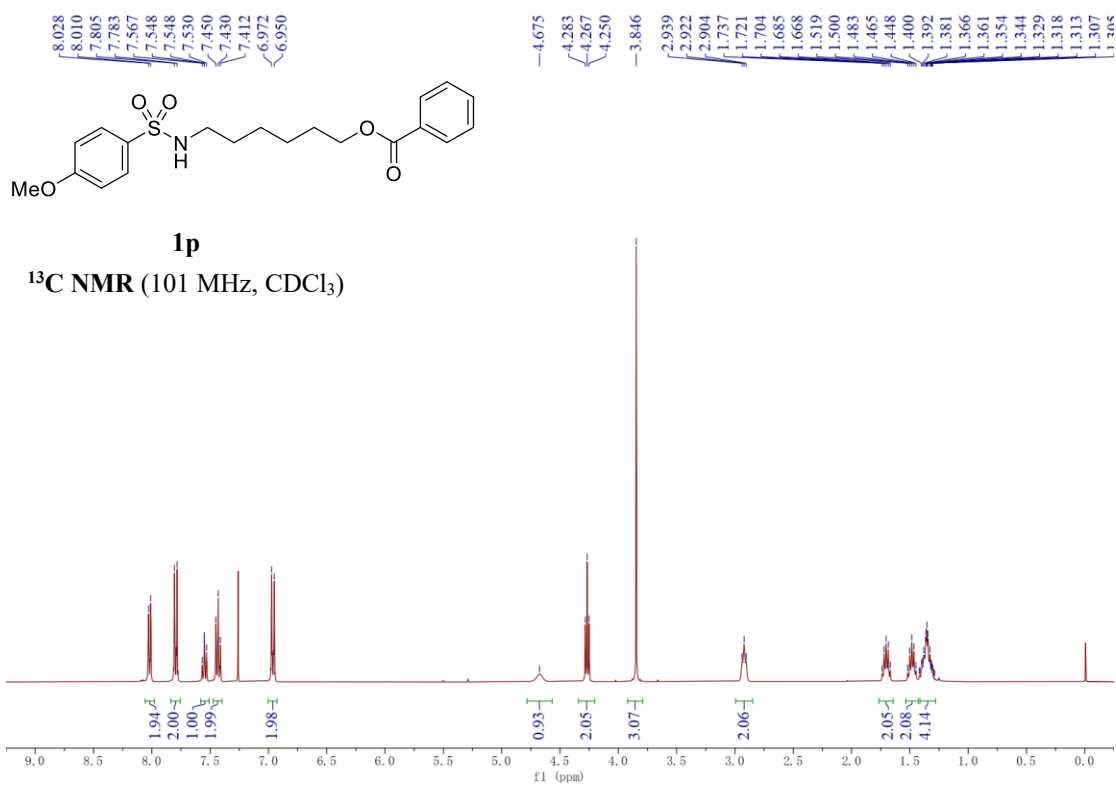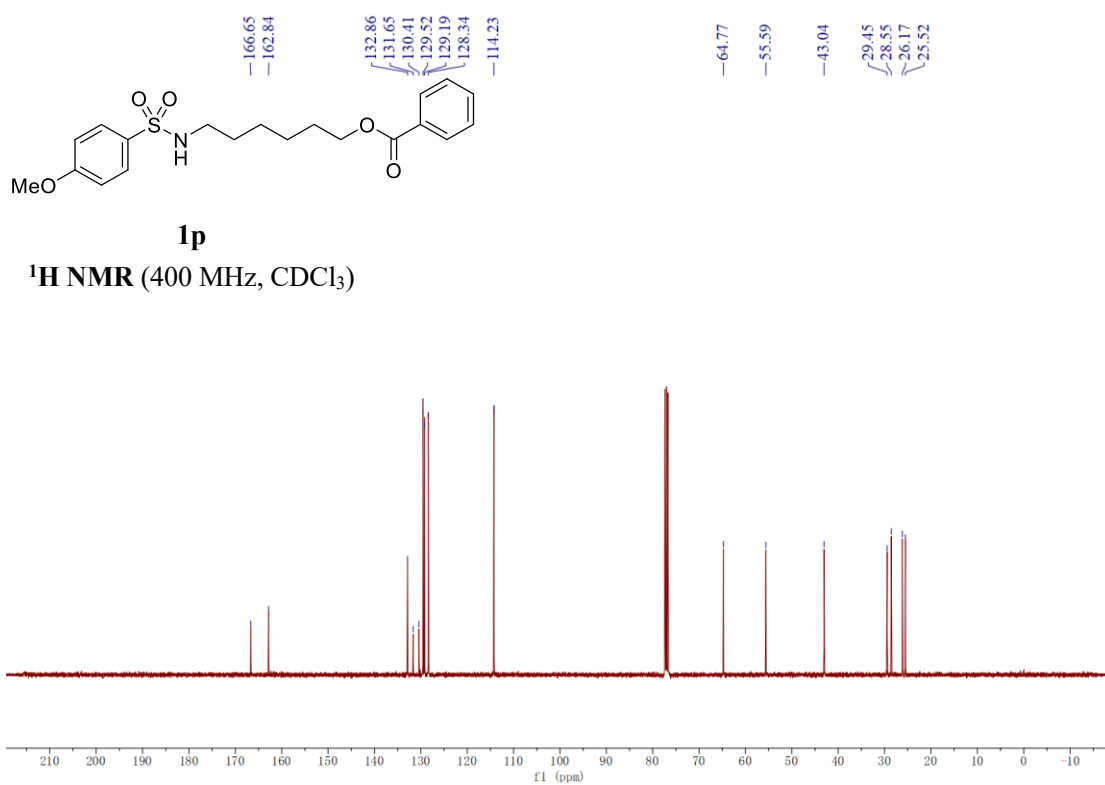

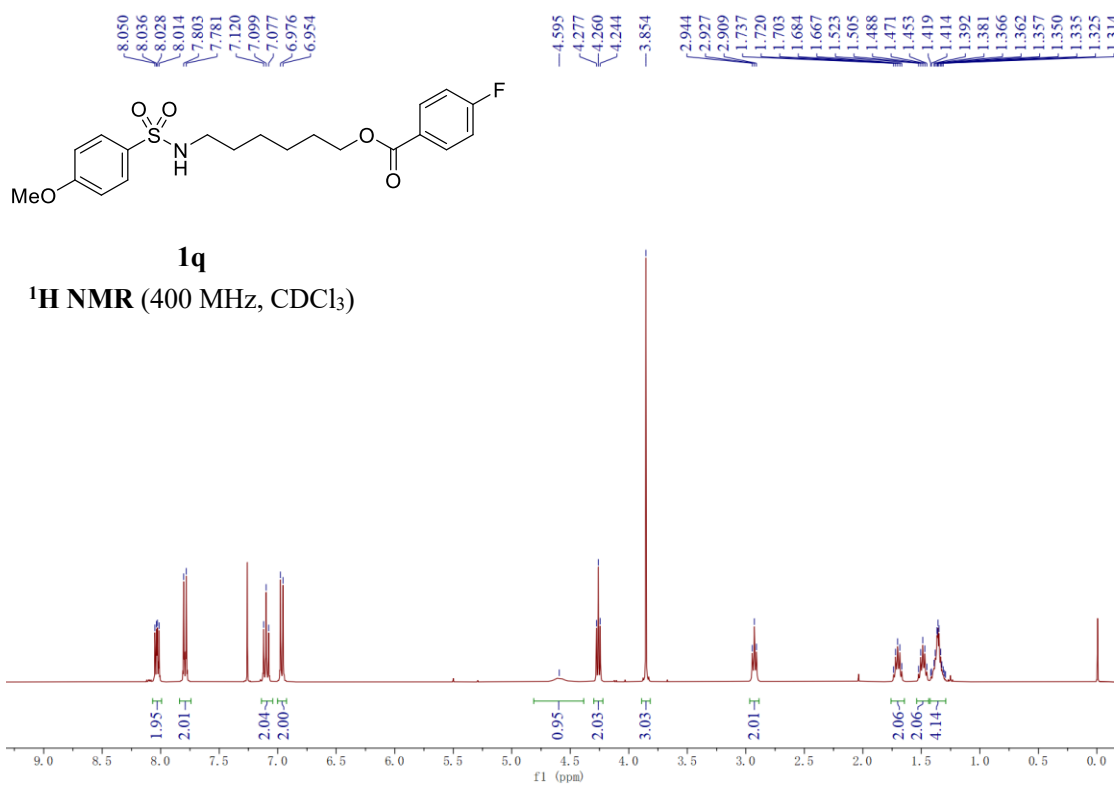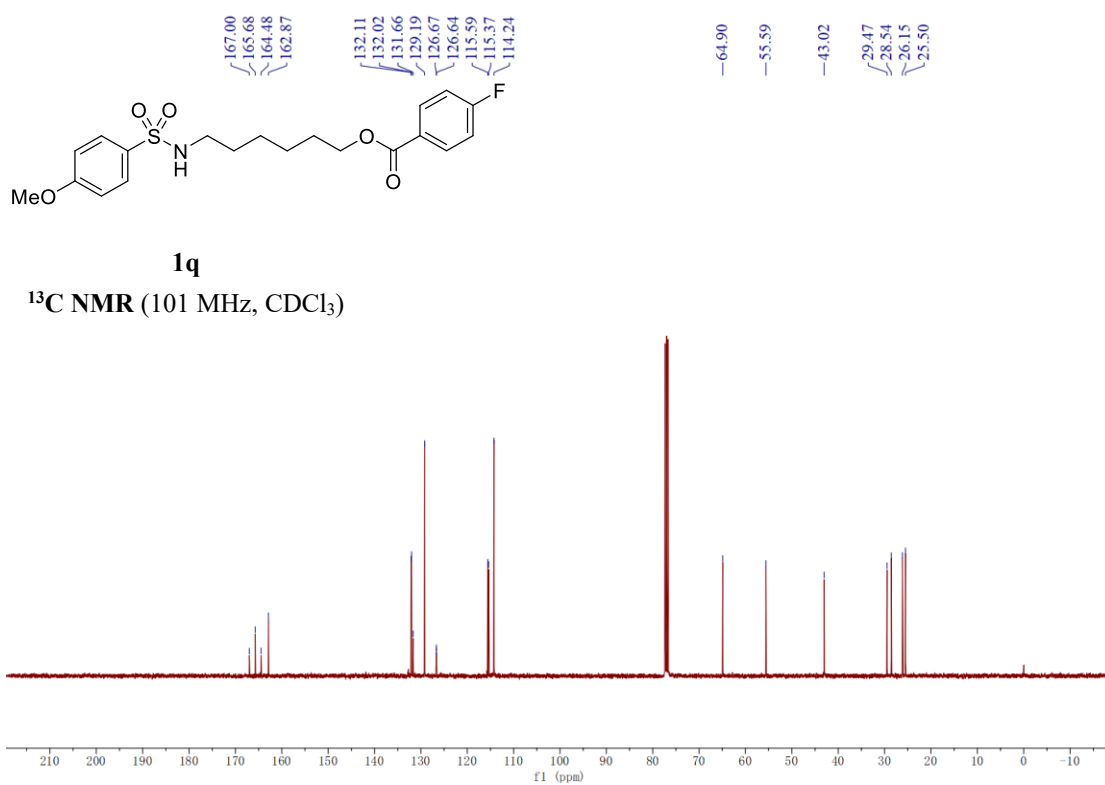

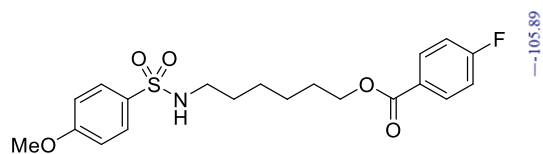

**1q**

**$^{19}\text{F}$  NMR (376 MHz,  $\text{CDCl}_3$ )**

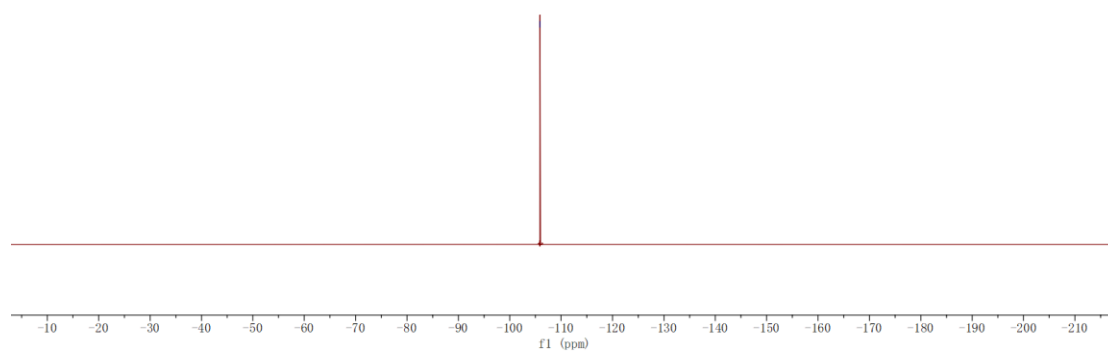

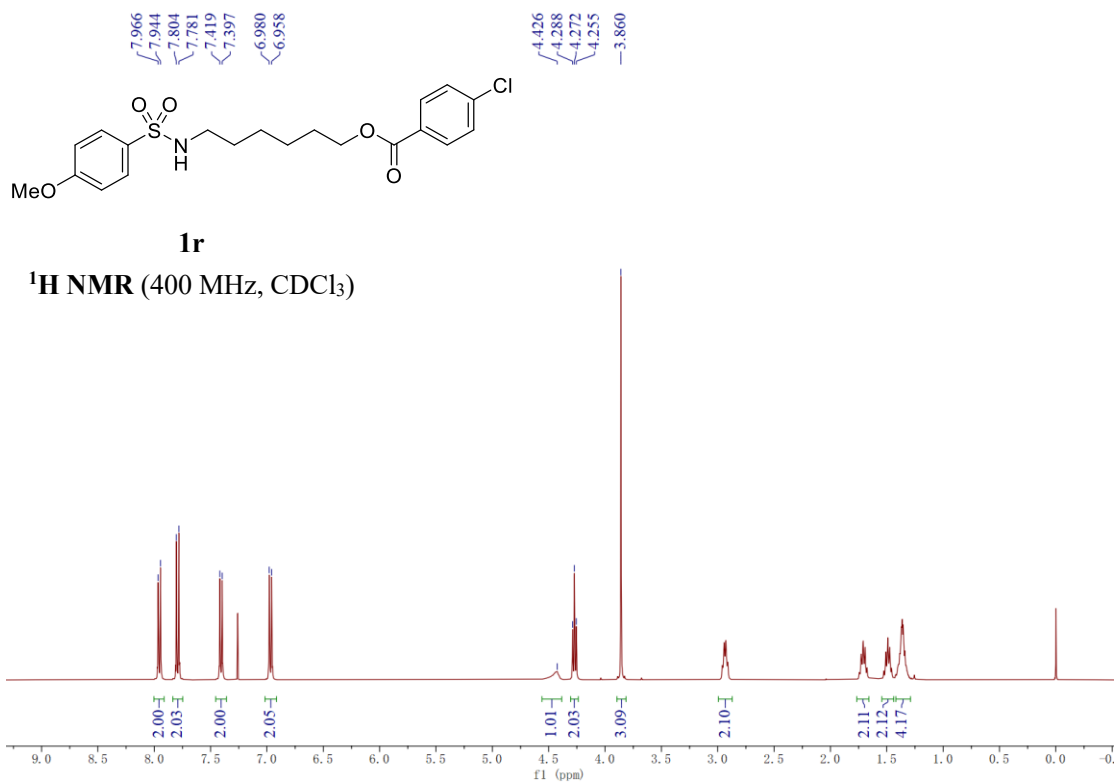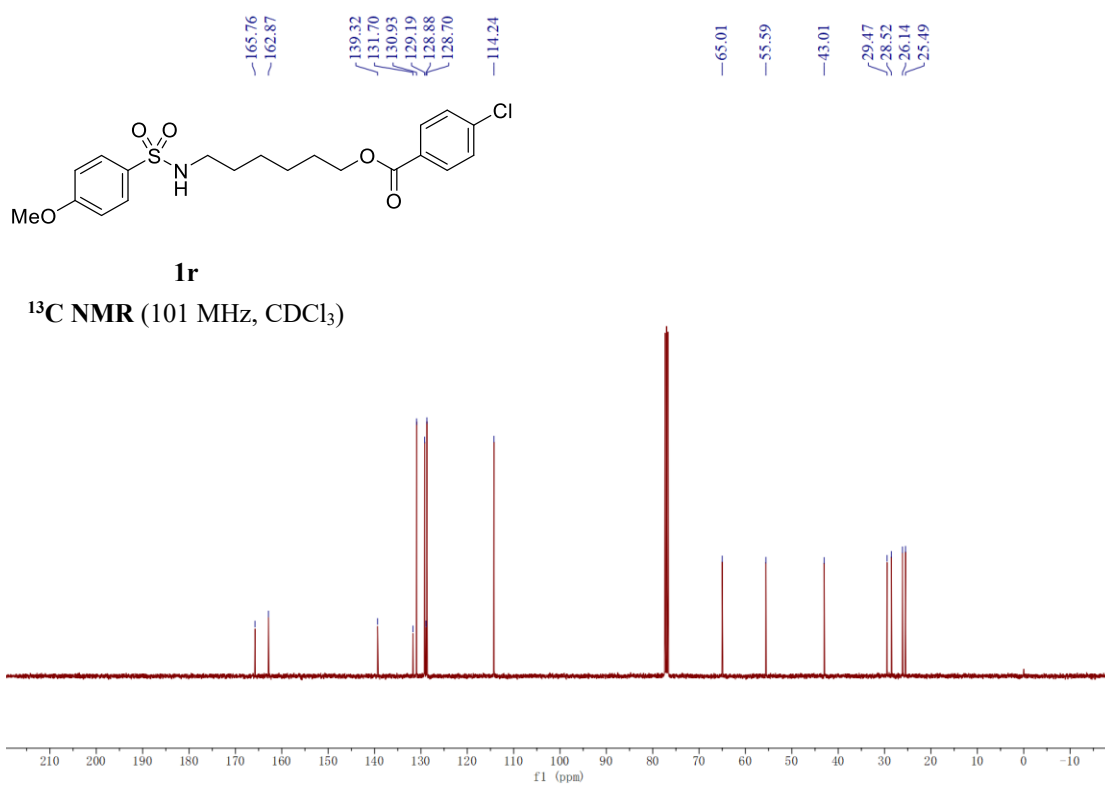

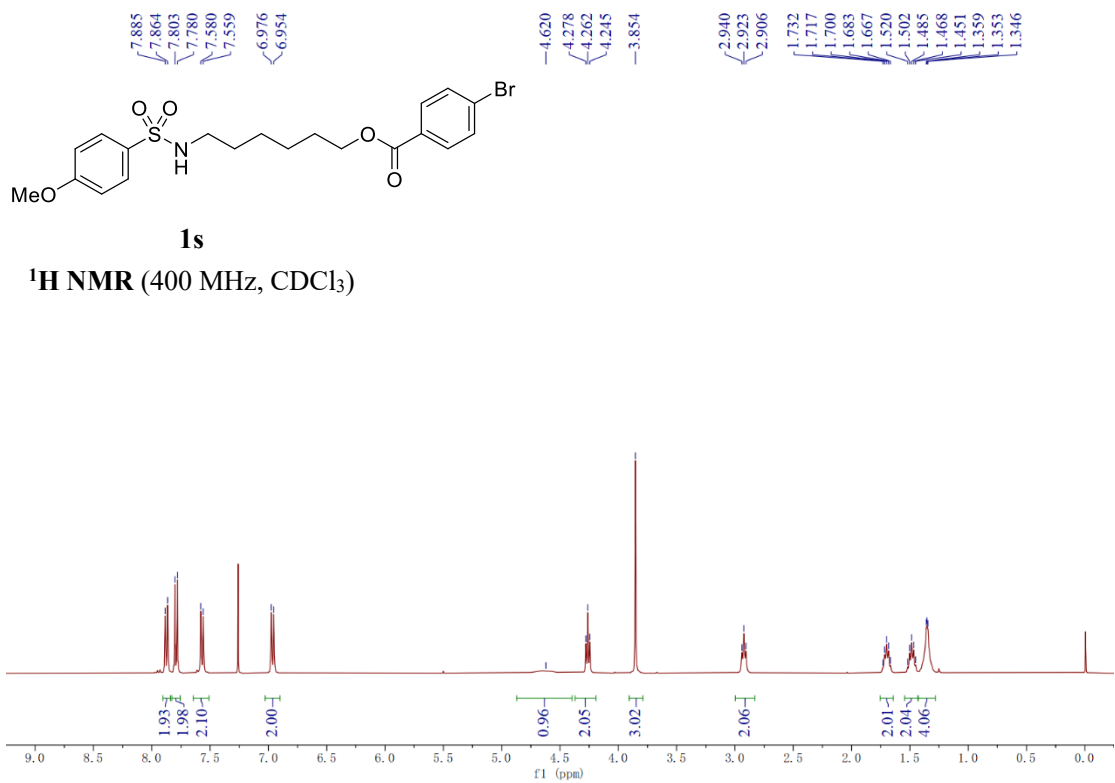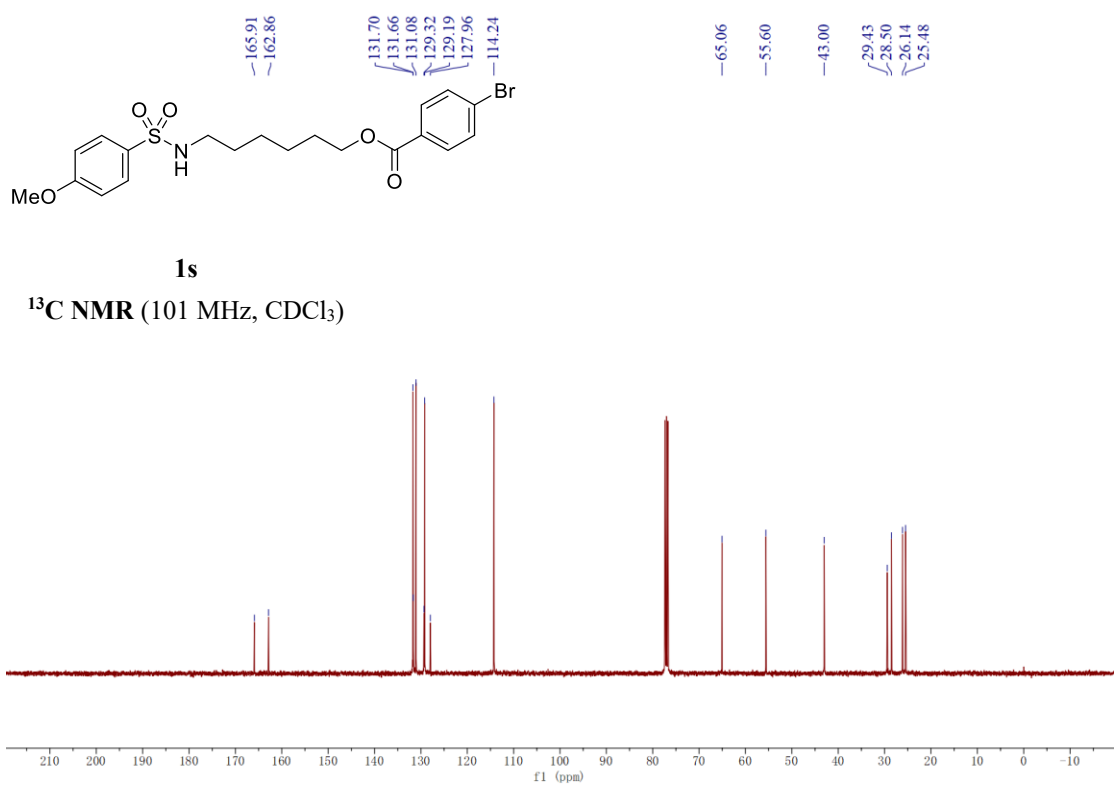



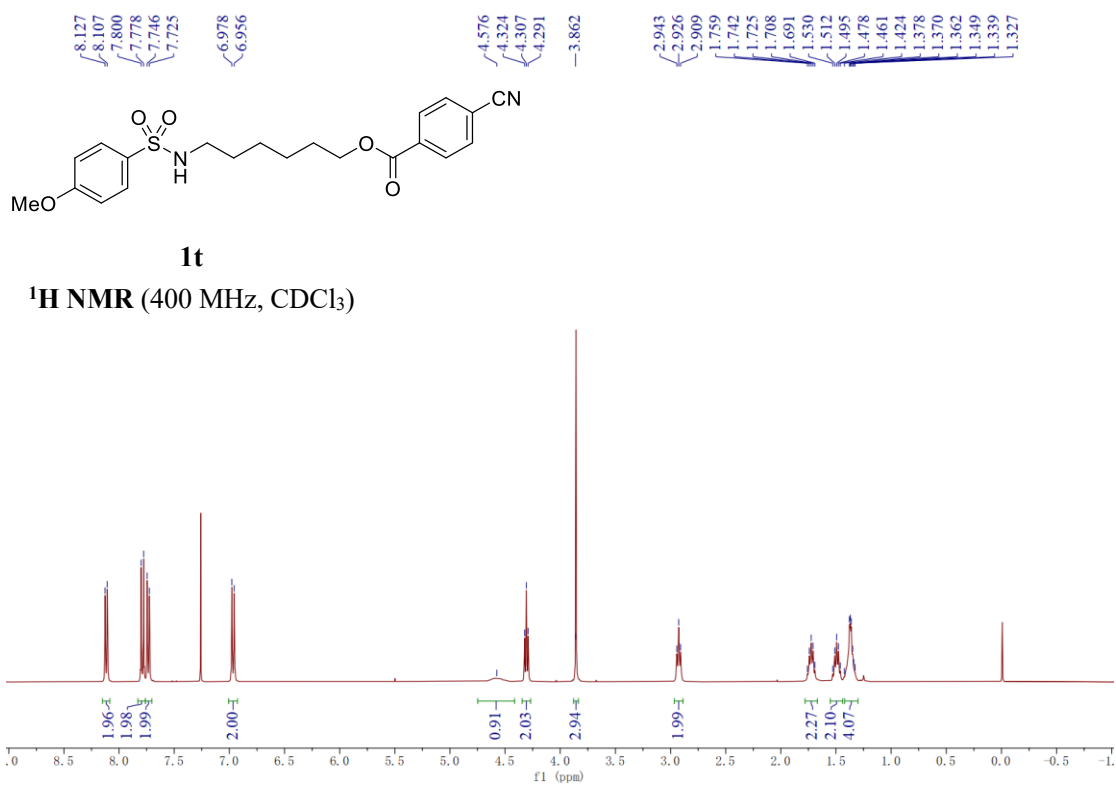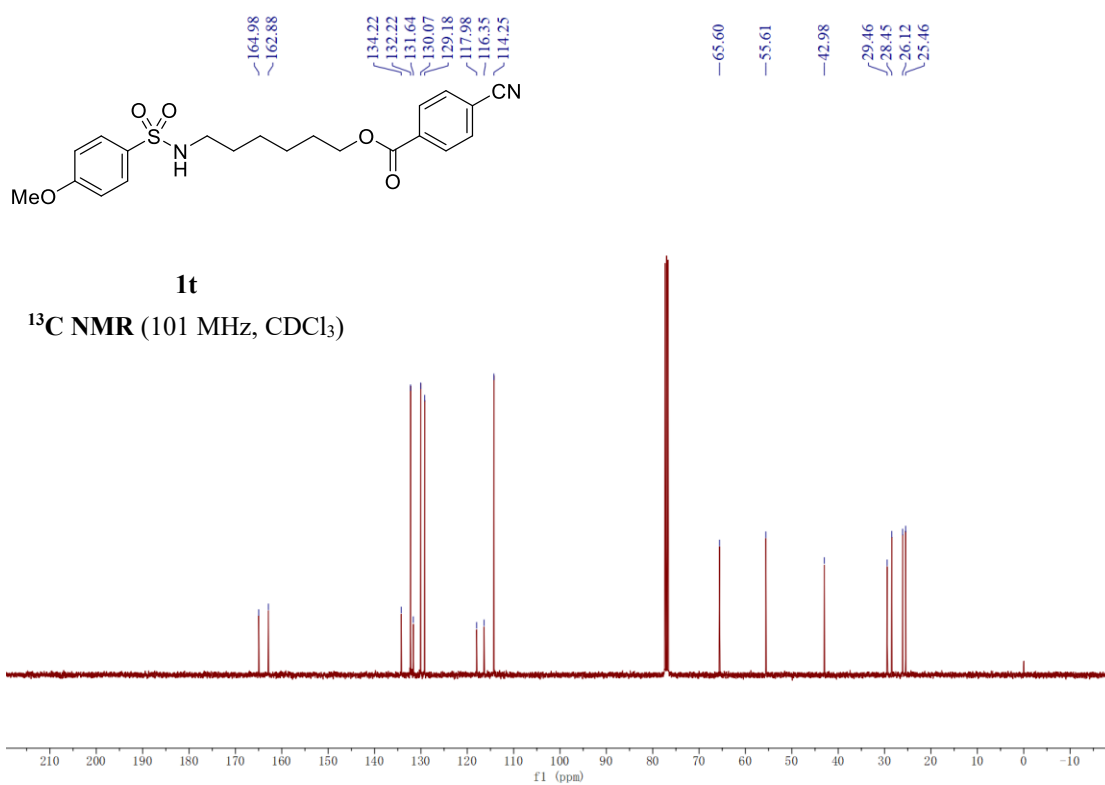

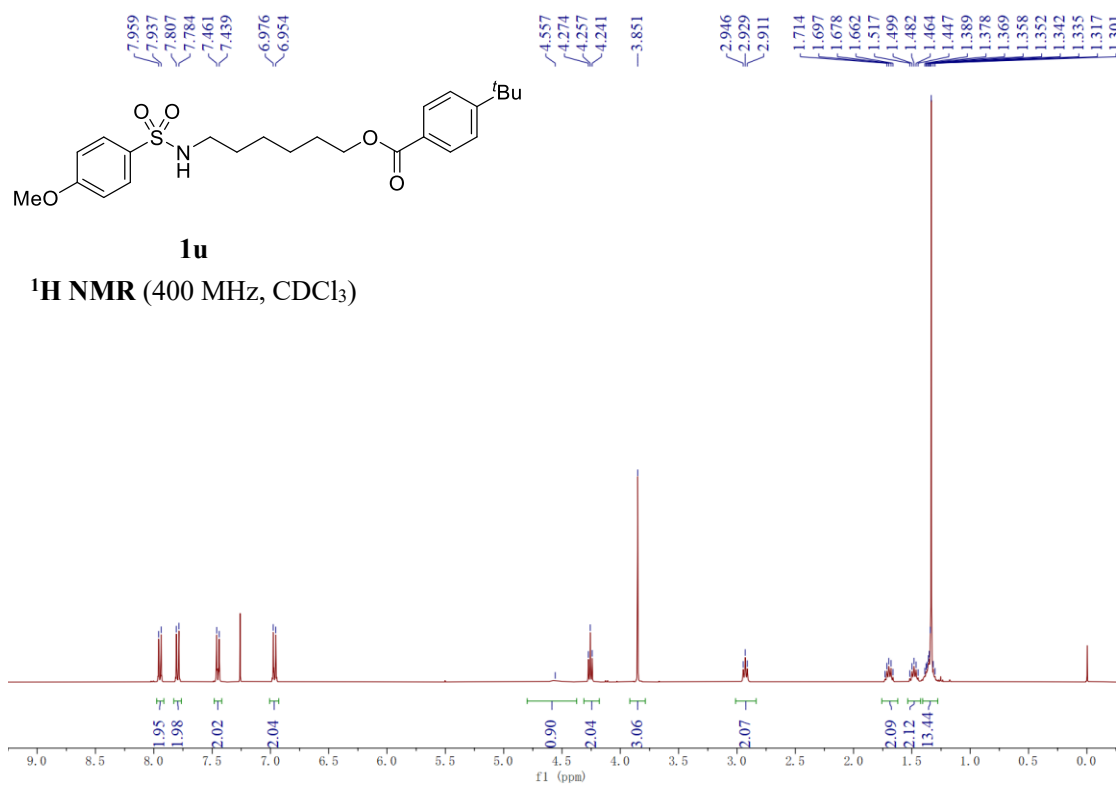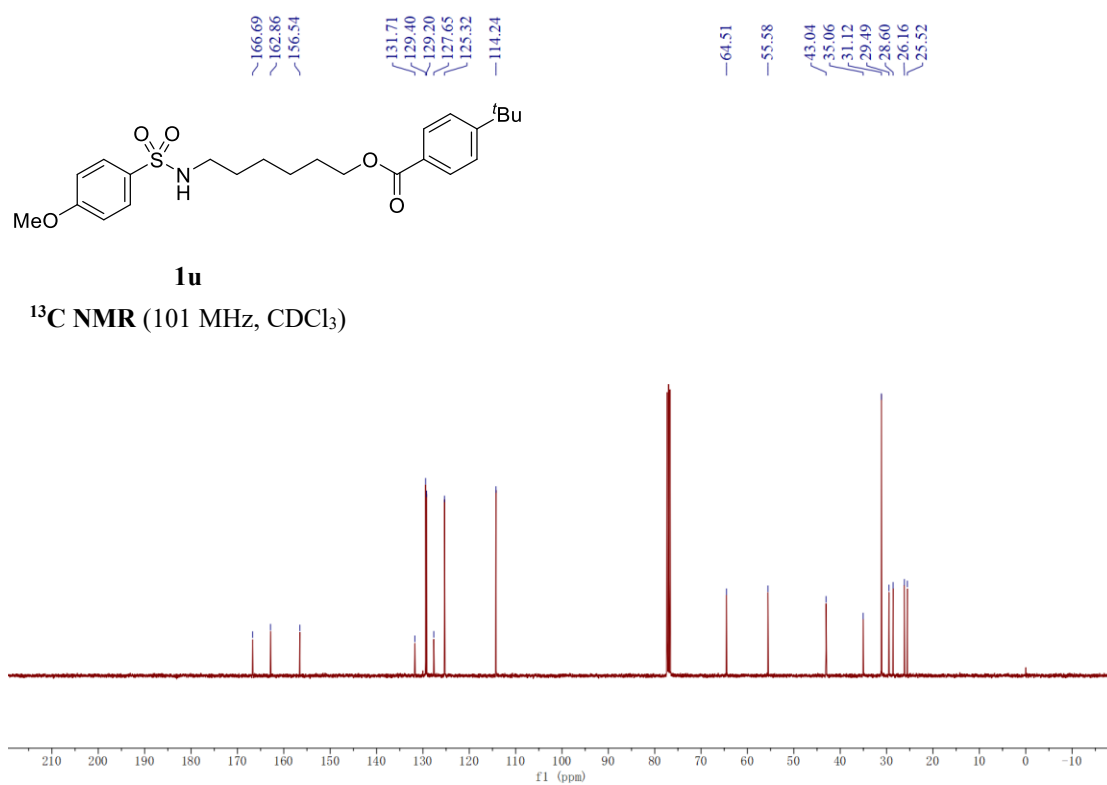

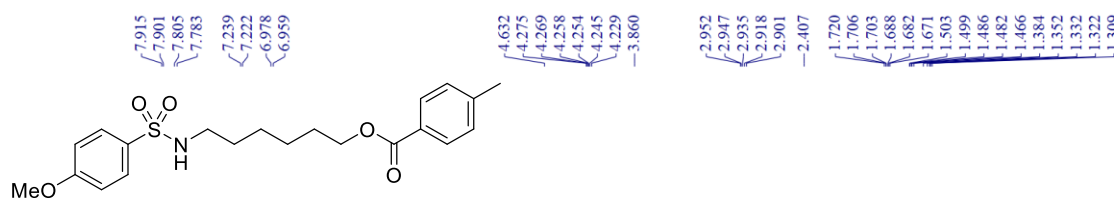

**1v**

$^1\text{H}$  NMR (400 MHz,  $\text{CDCl}_3$ )

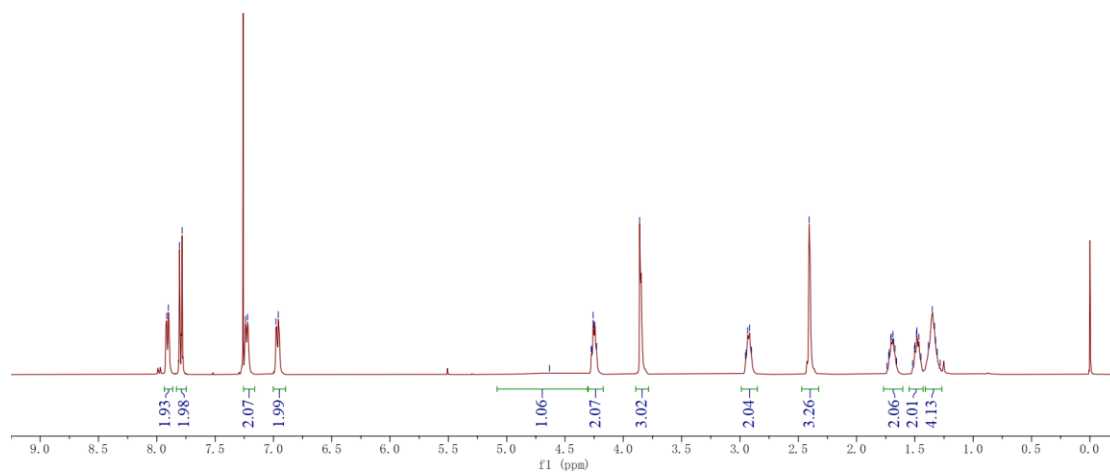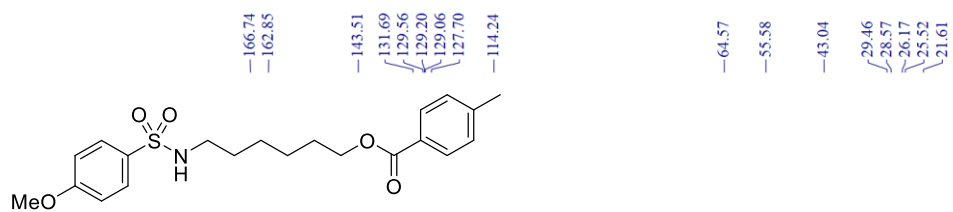

**1v**

$^{13}\text{C}$  NMR (101 MHz,  $\text{CDCl}_3$ )

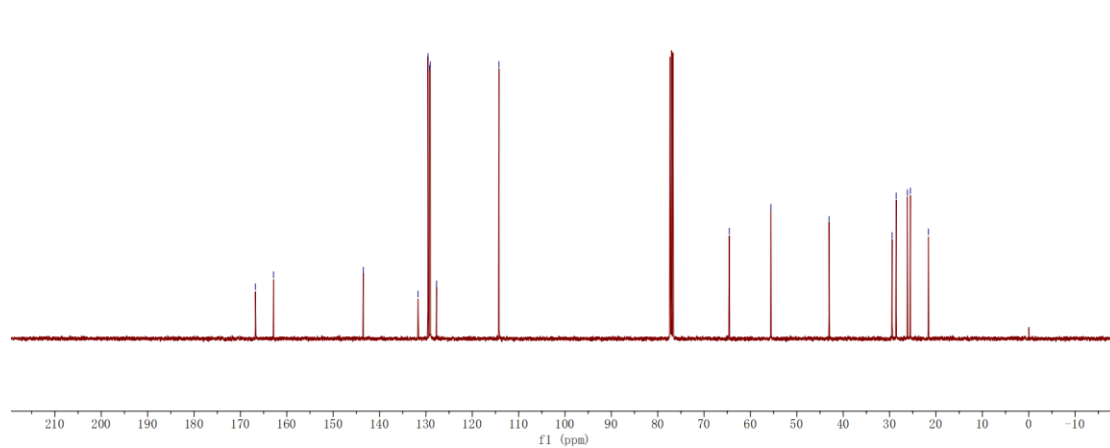

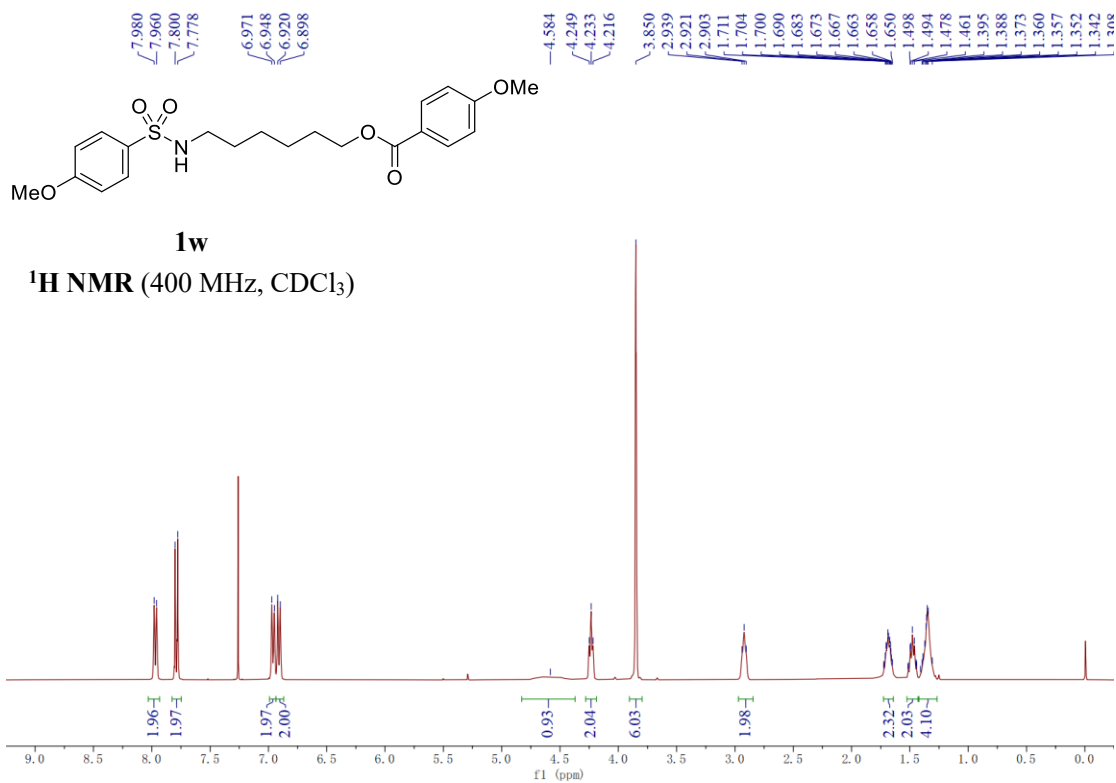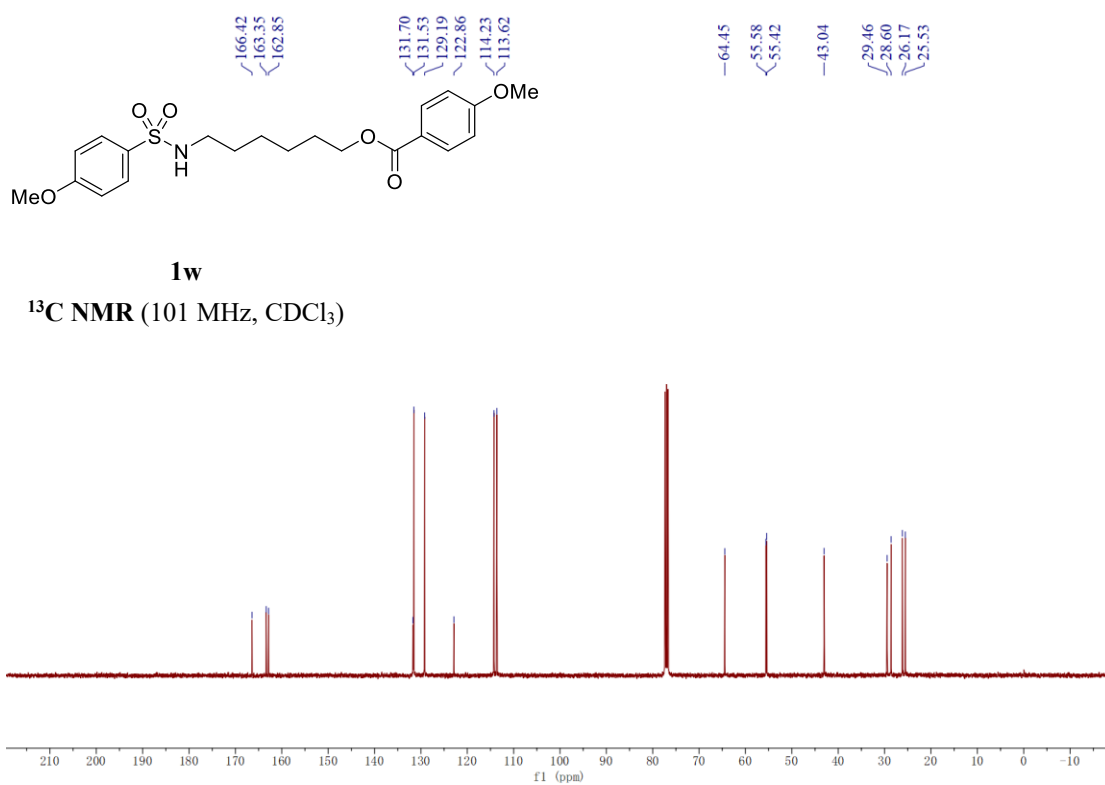

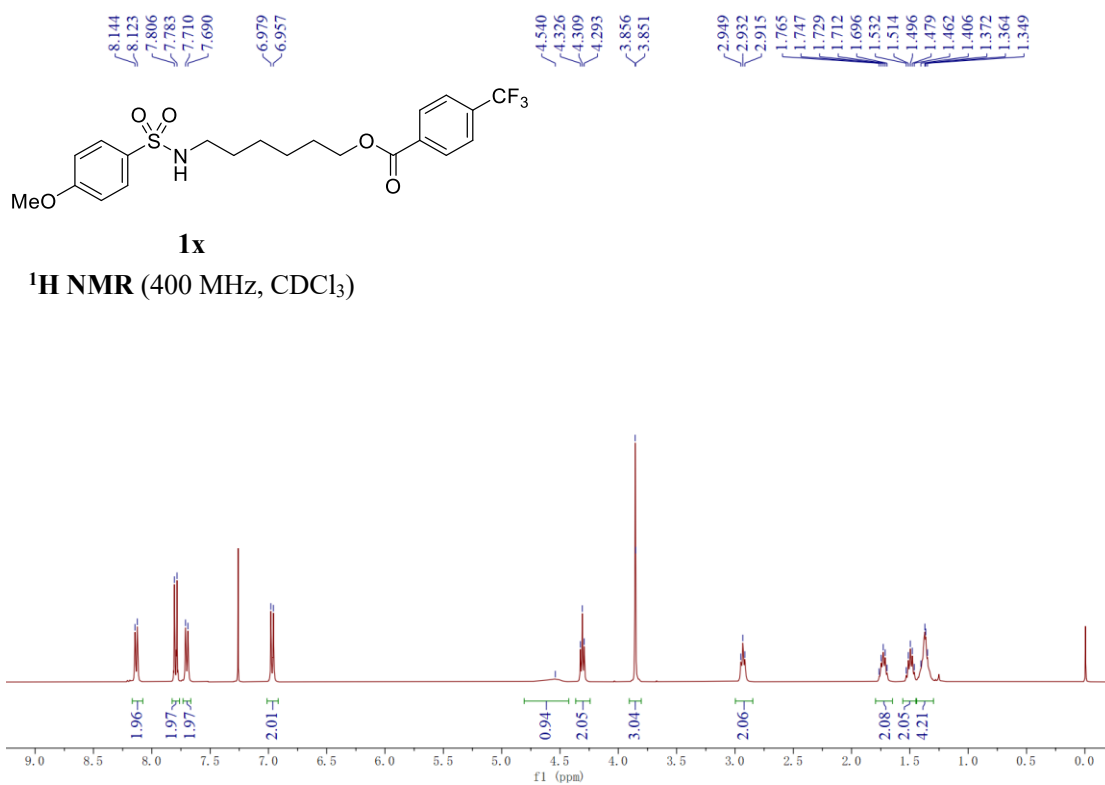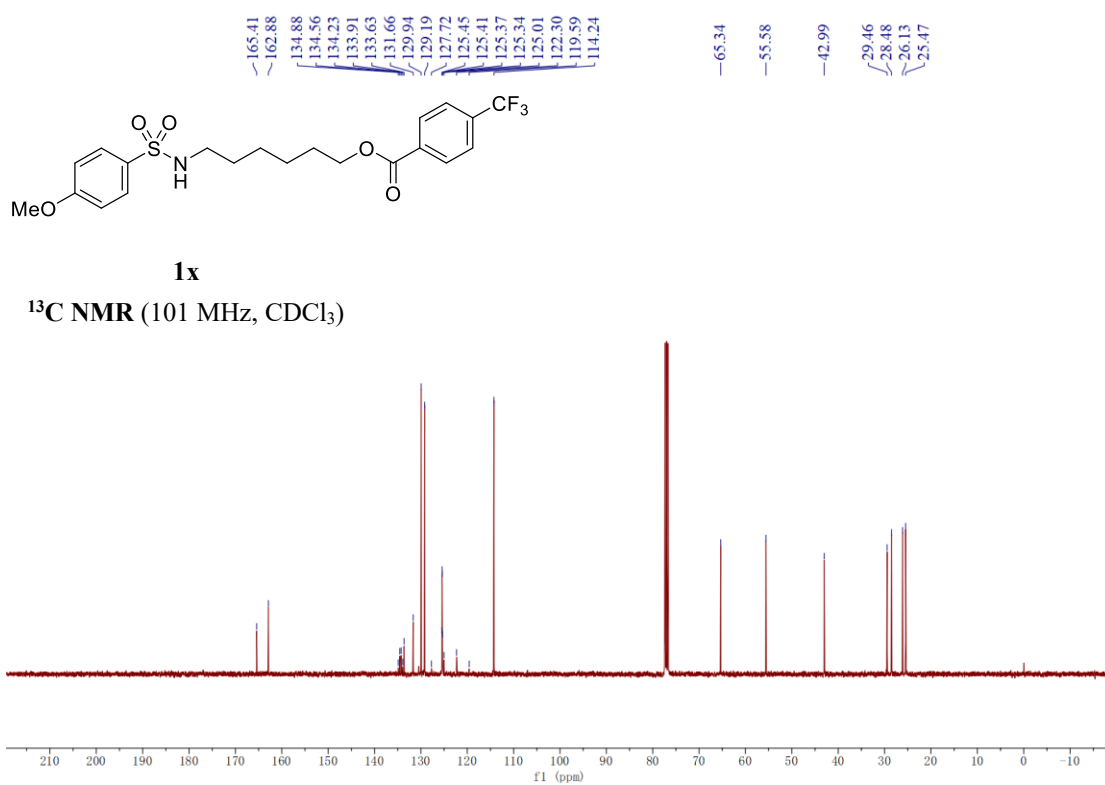

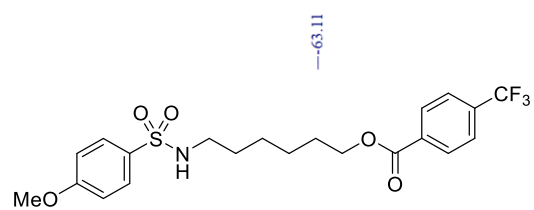

**1x**

**$^{19}\text{F}$  NMR (376 MHz,  $\text{CDCl}_3$ )**

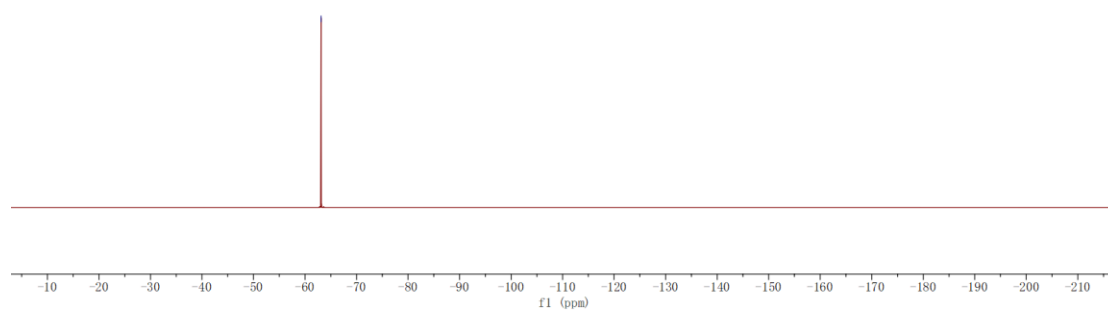

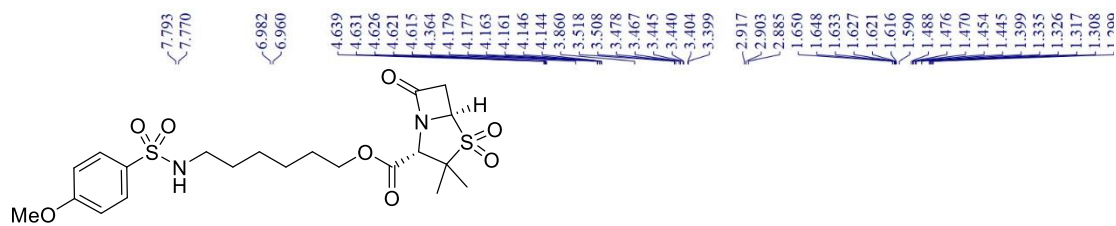

**1y**  
 $^1\text{H}$  NMR (400 MHz,  $\text{CDCl}_3$ )

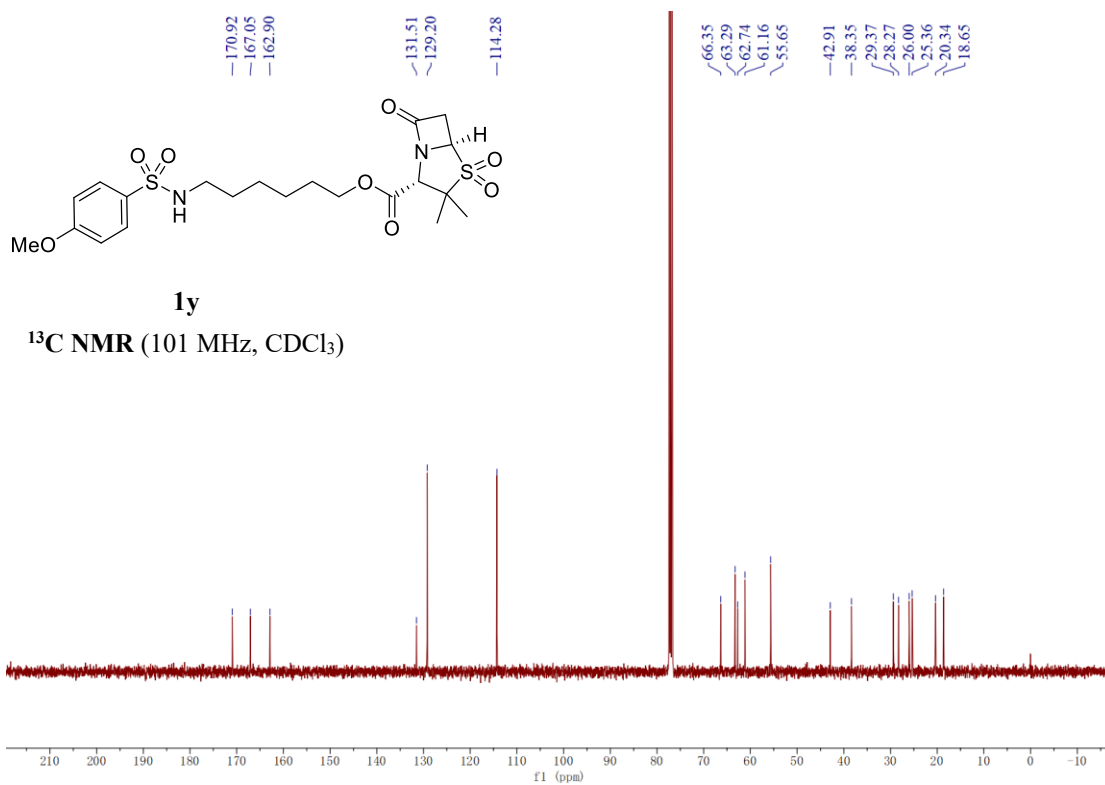

**1y**  
 $^{13}\text{C}$  NMR (101 MHz,  $\text{CDCl}_3$ )

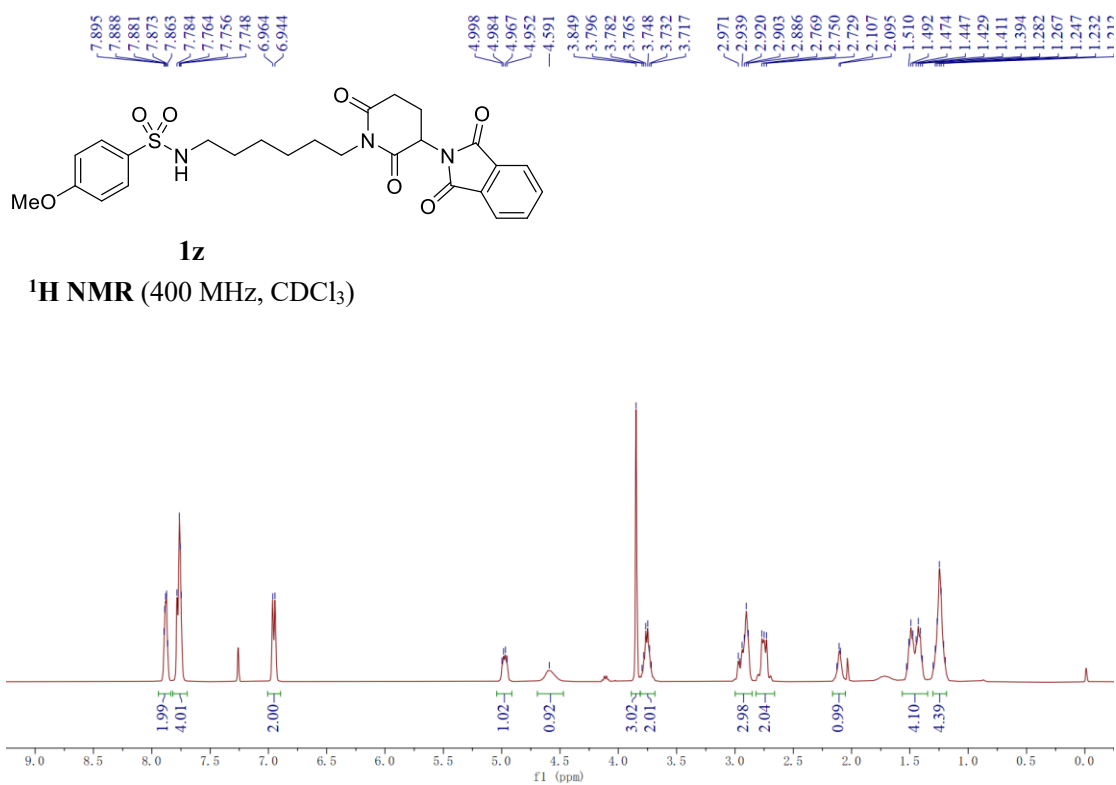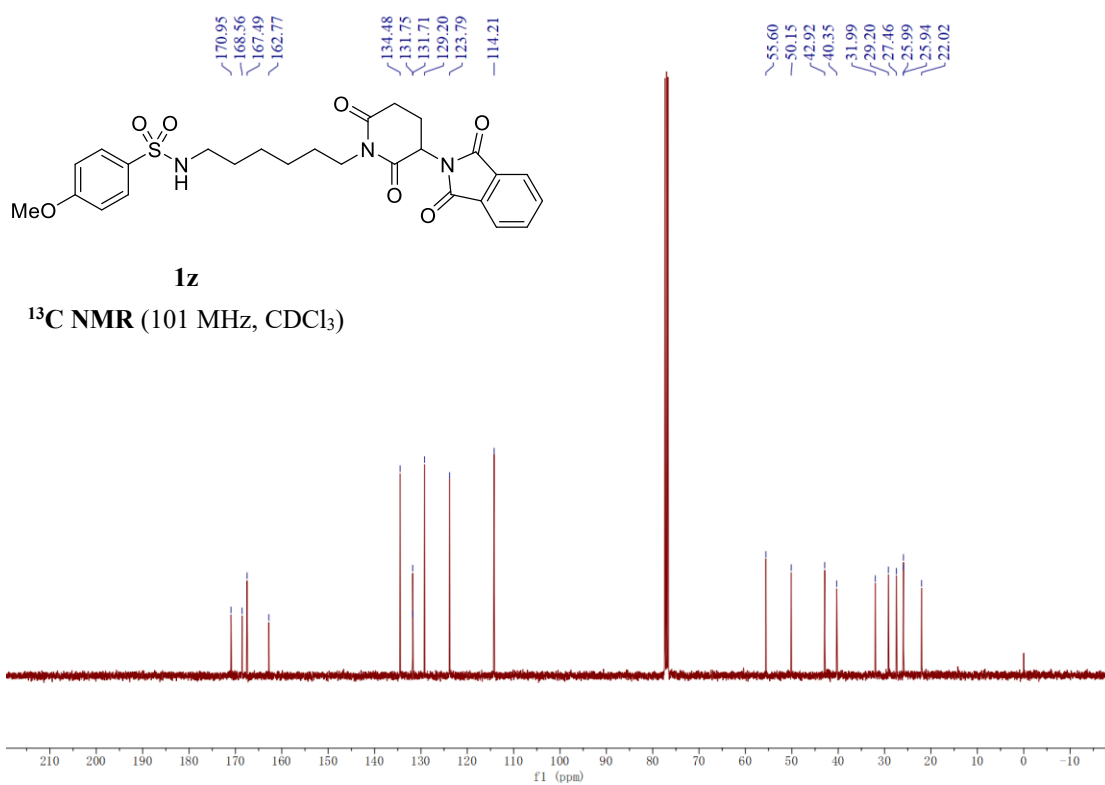



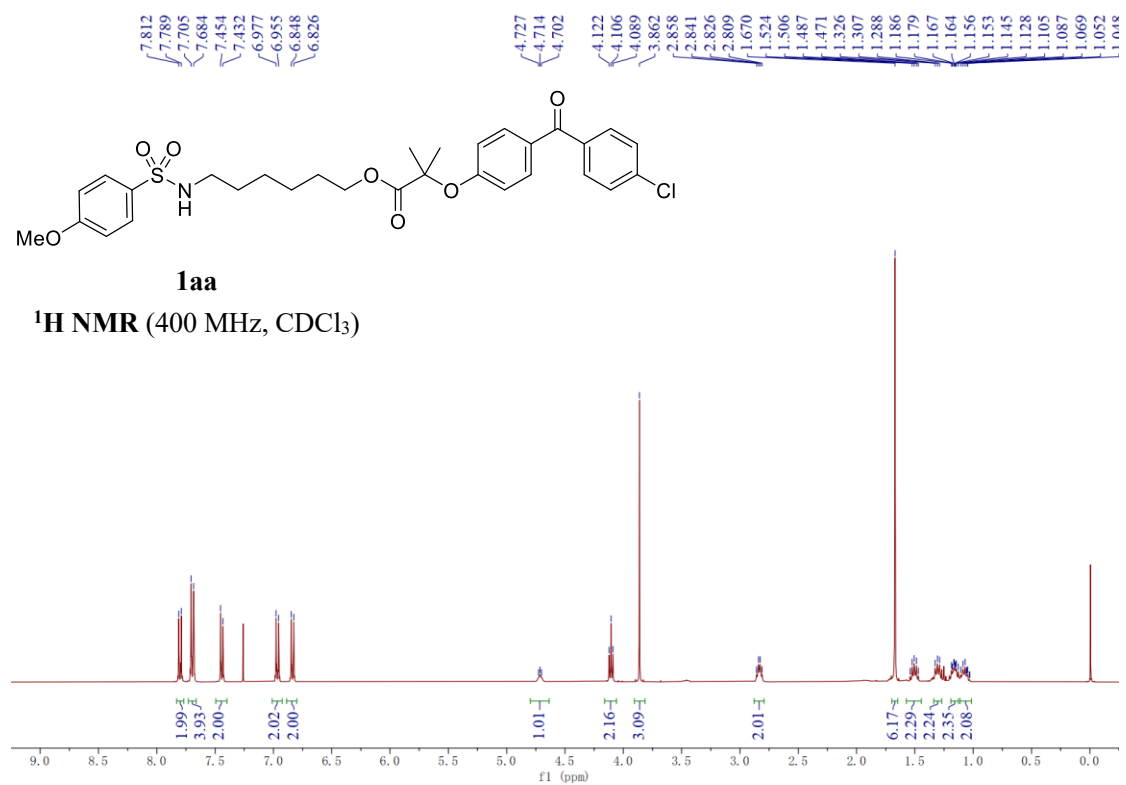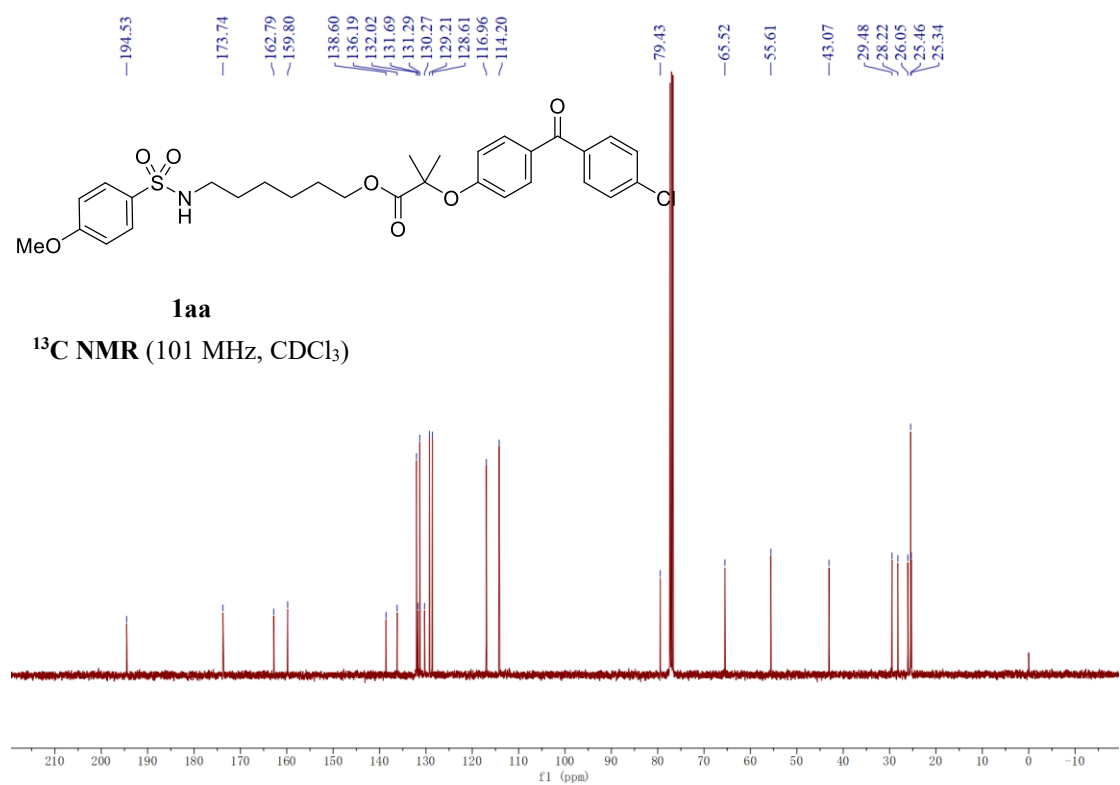

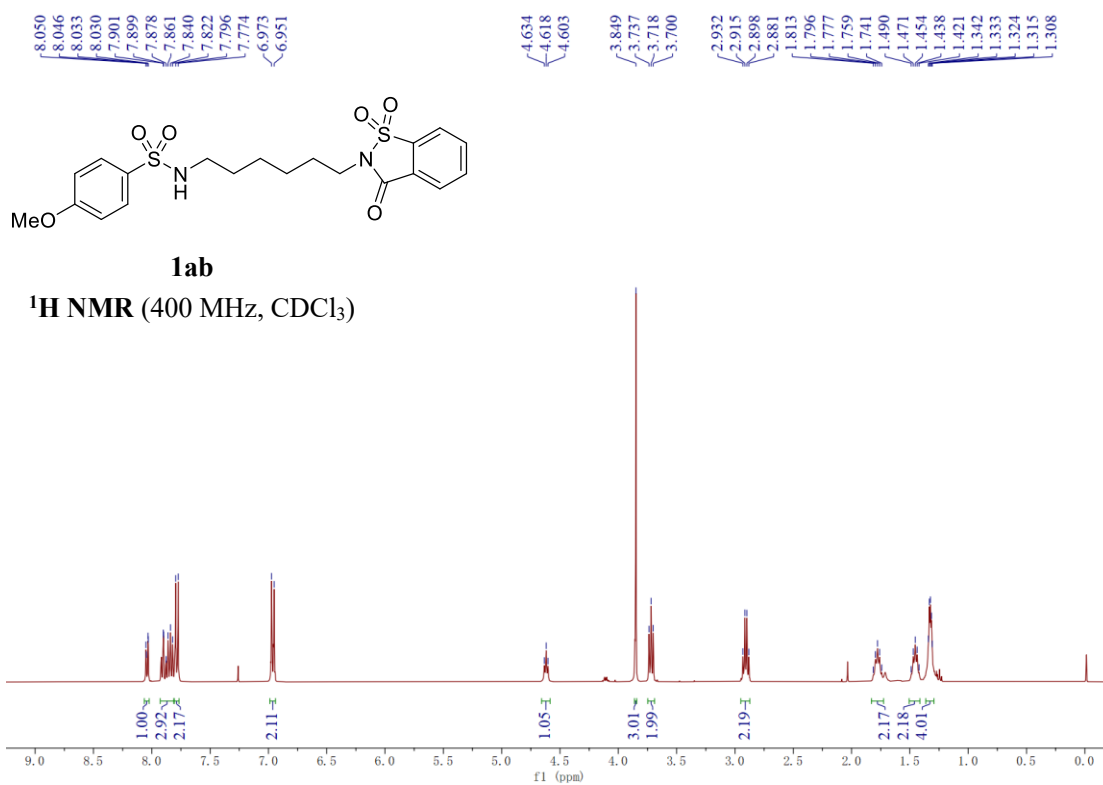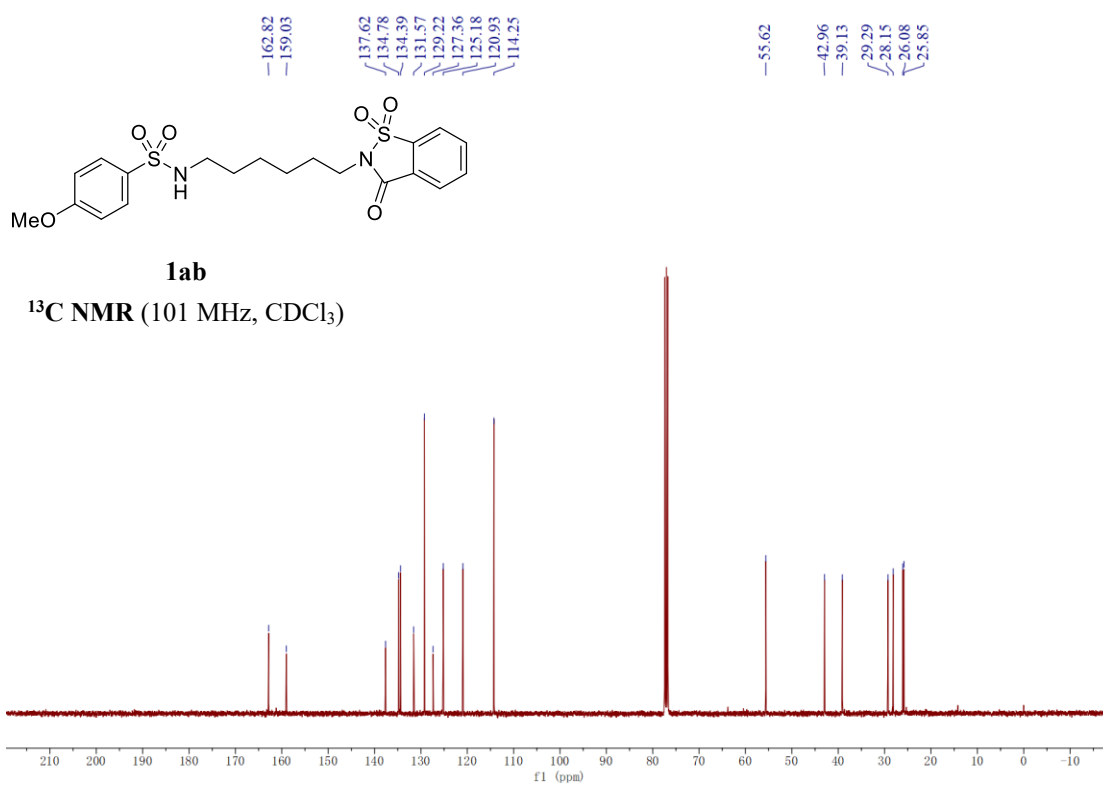

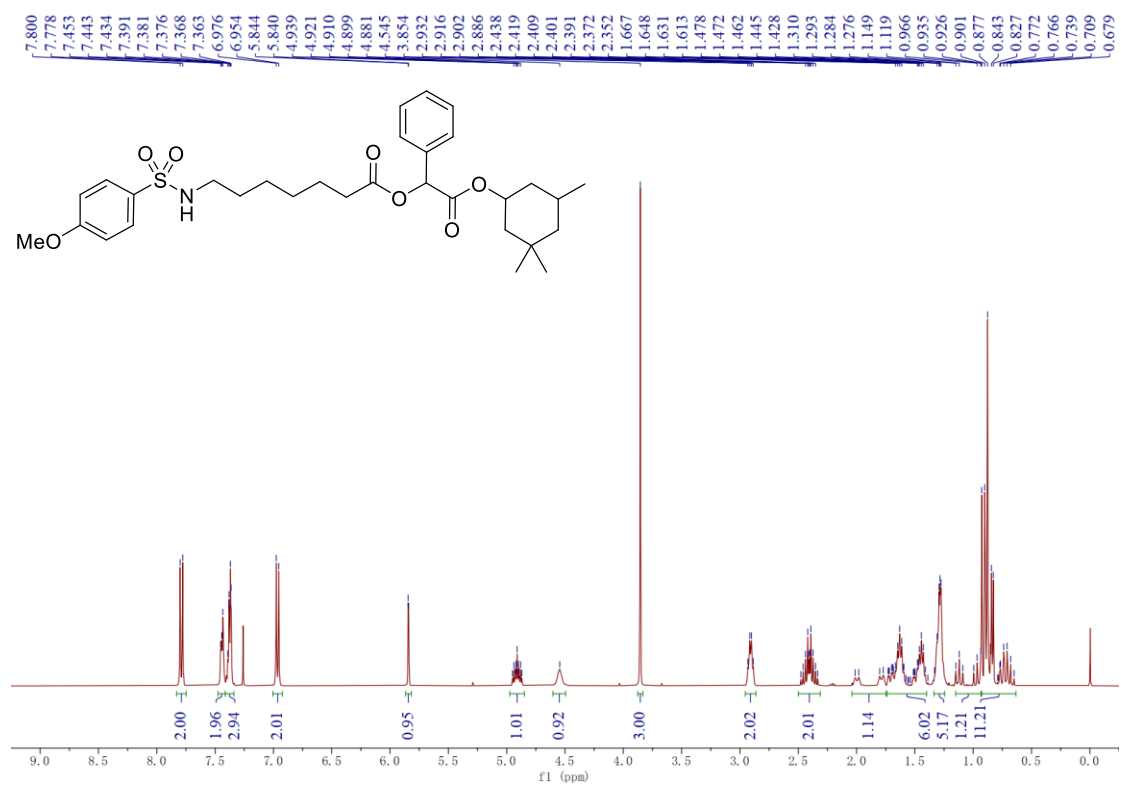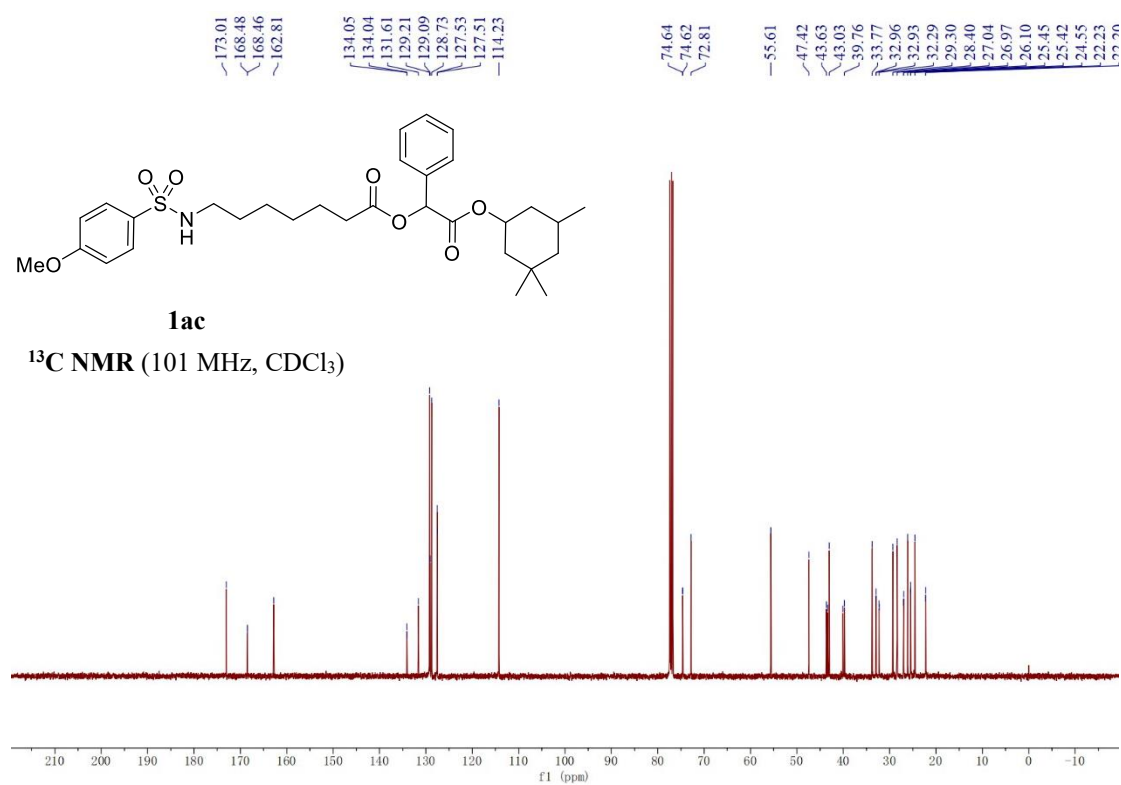

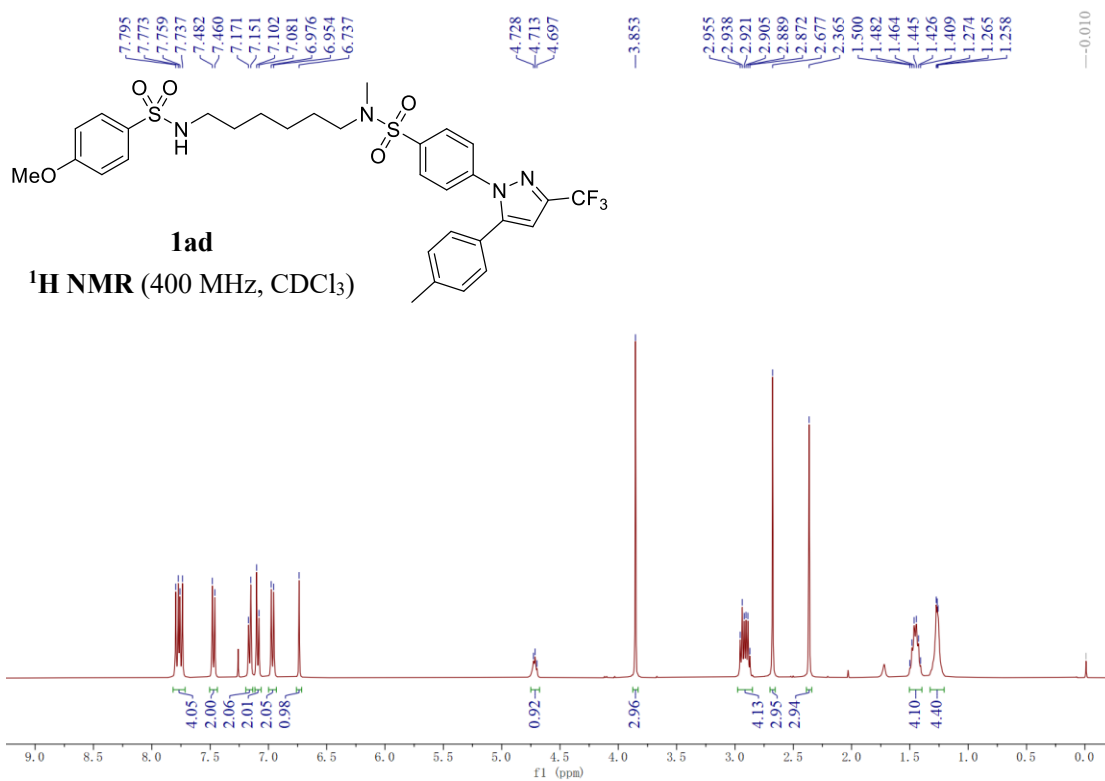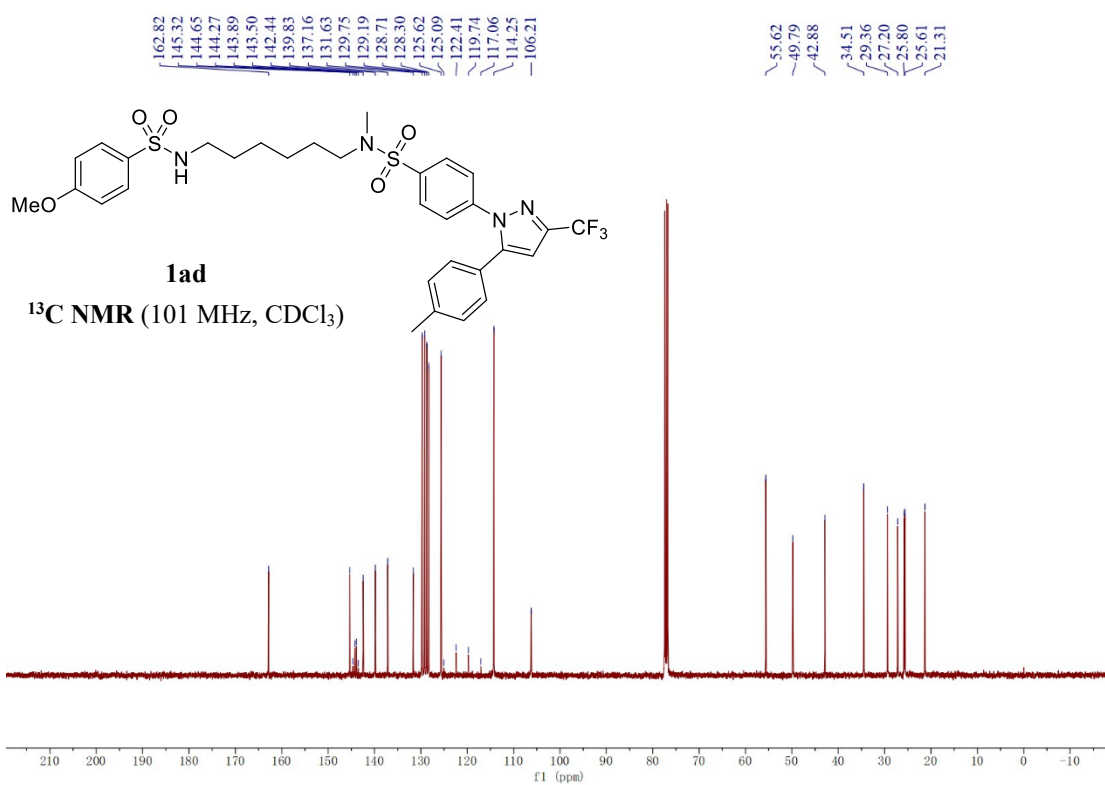

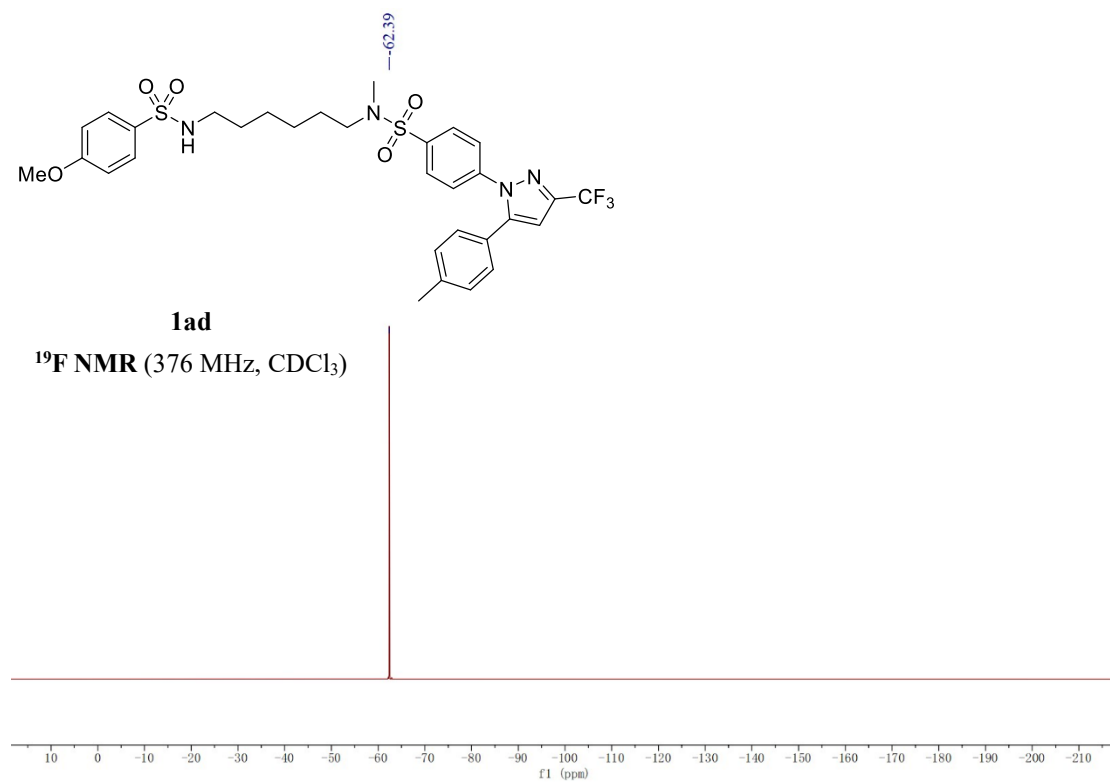

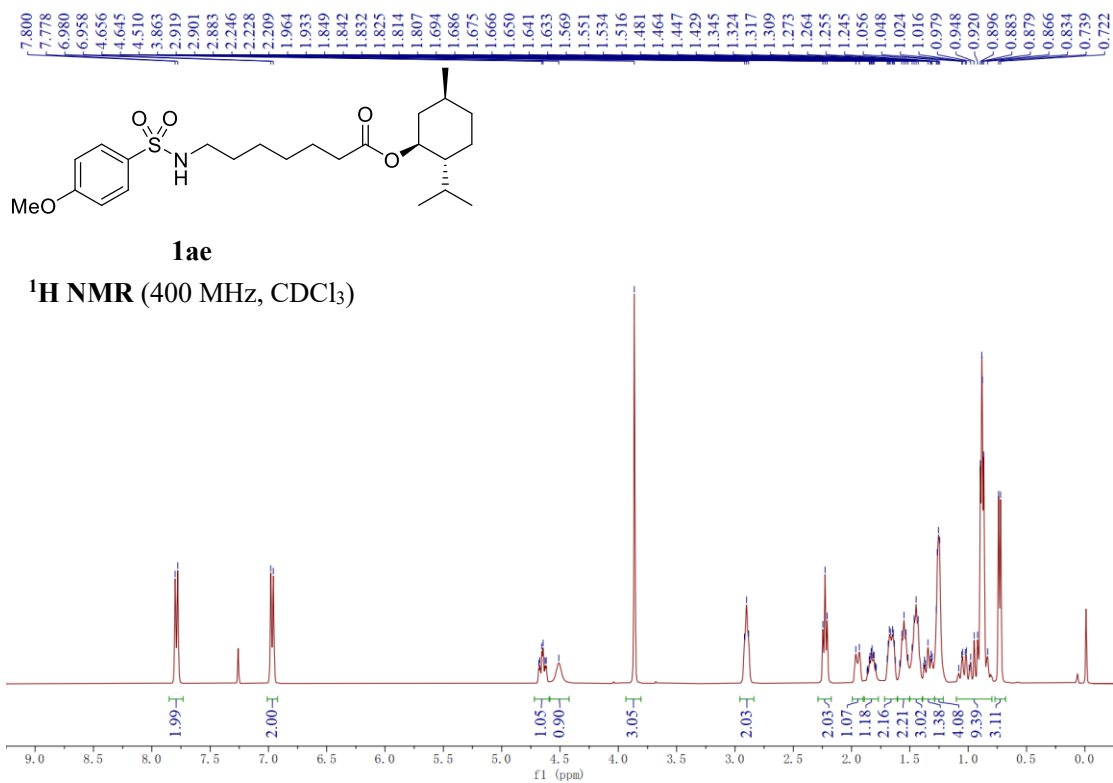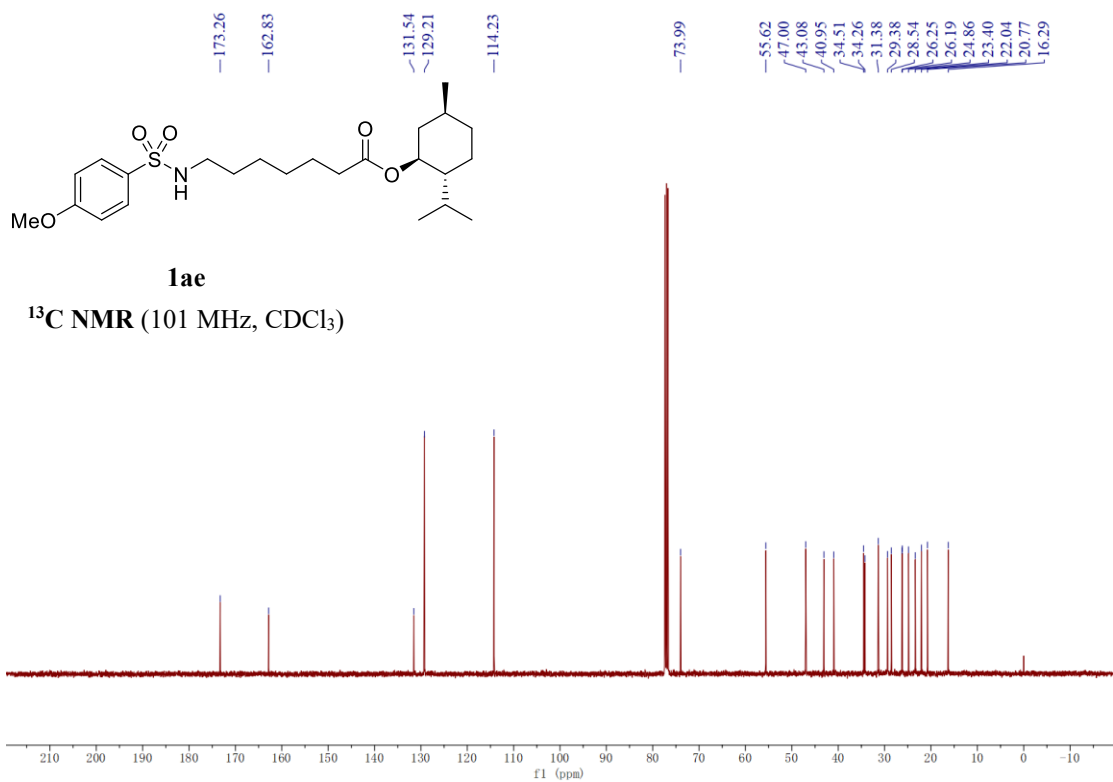

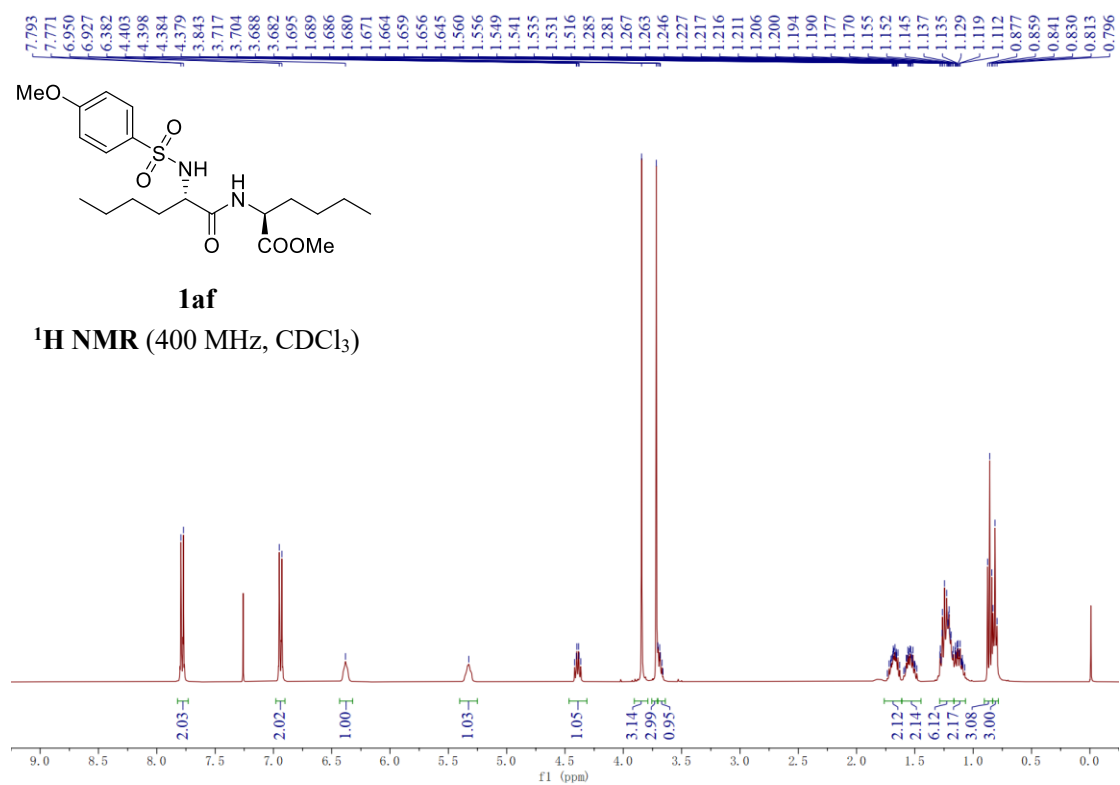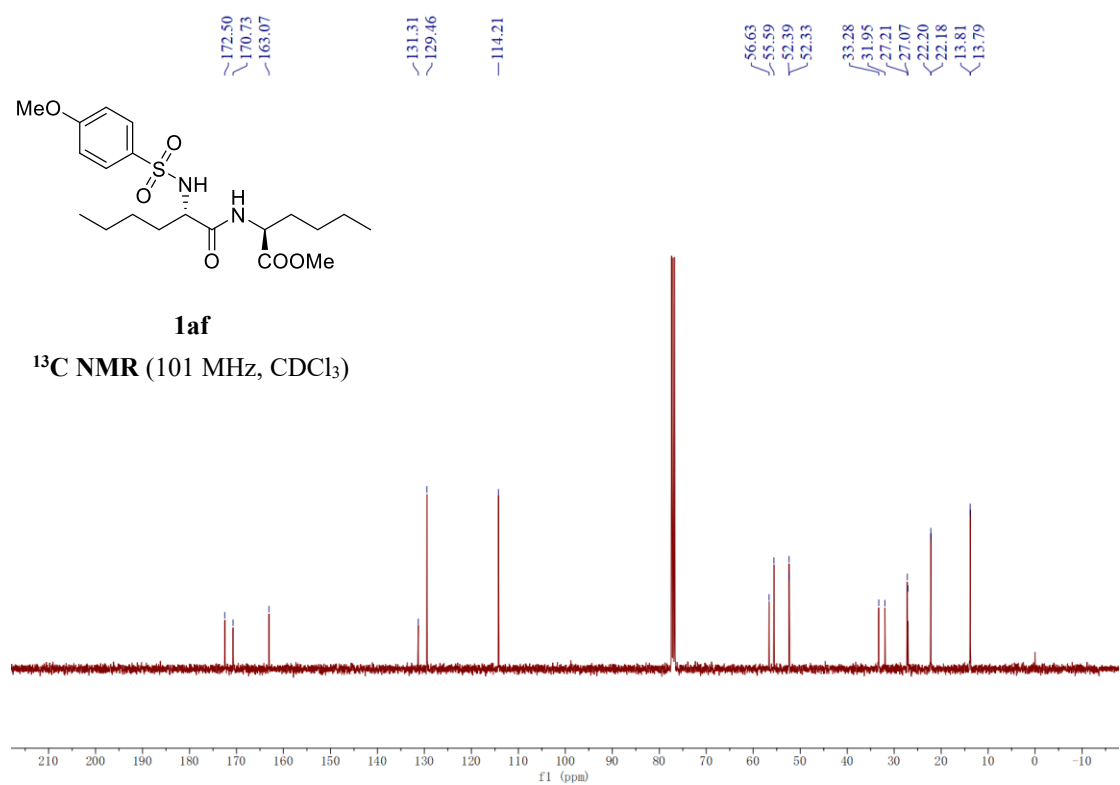

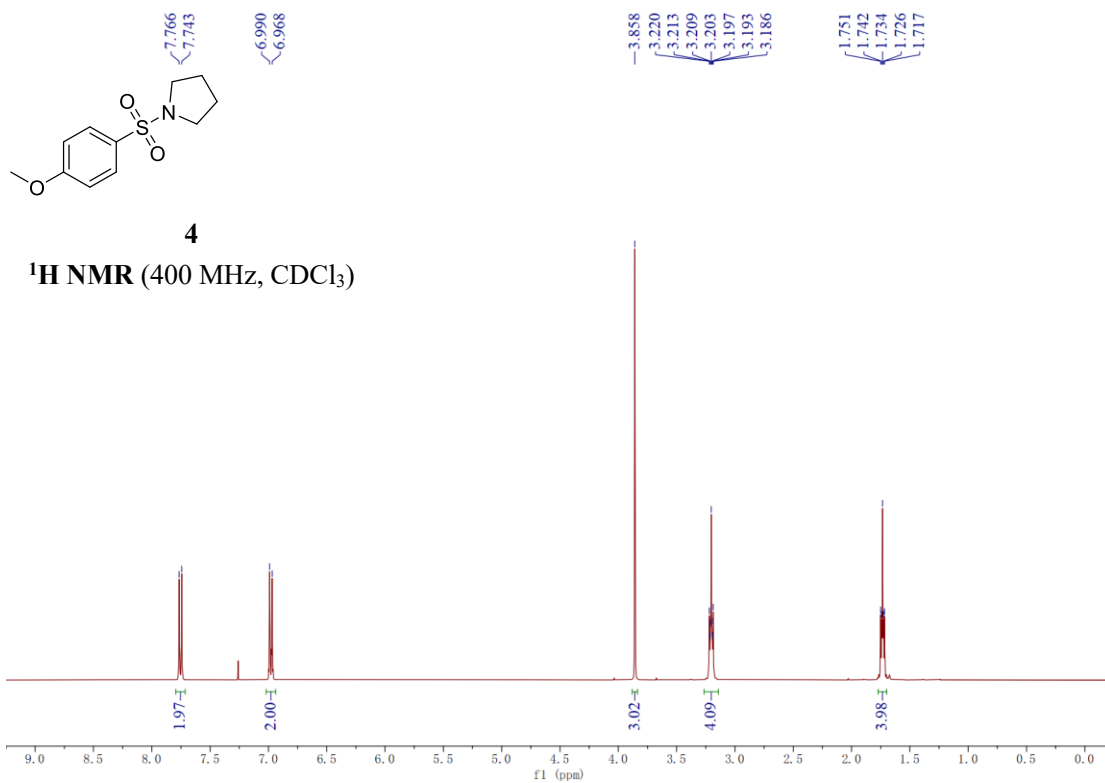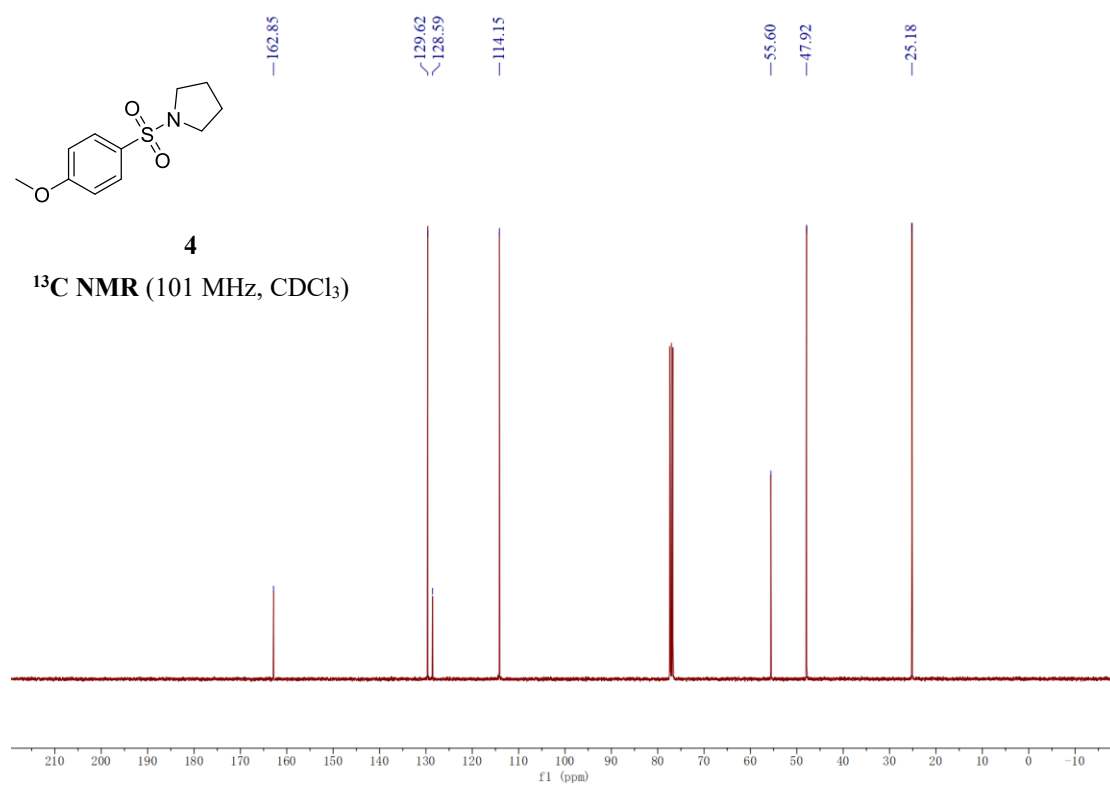



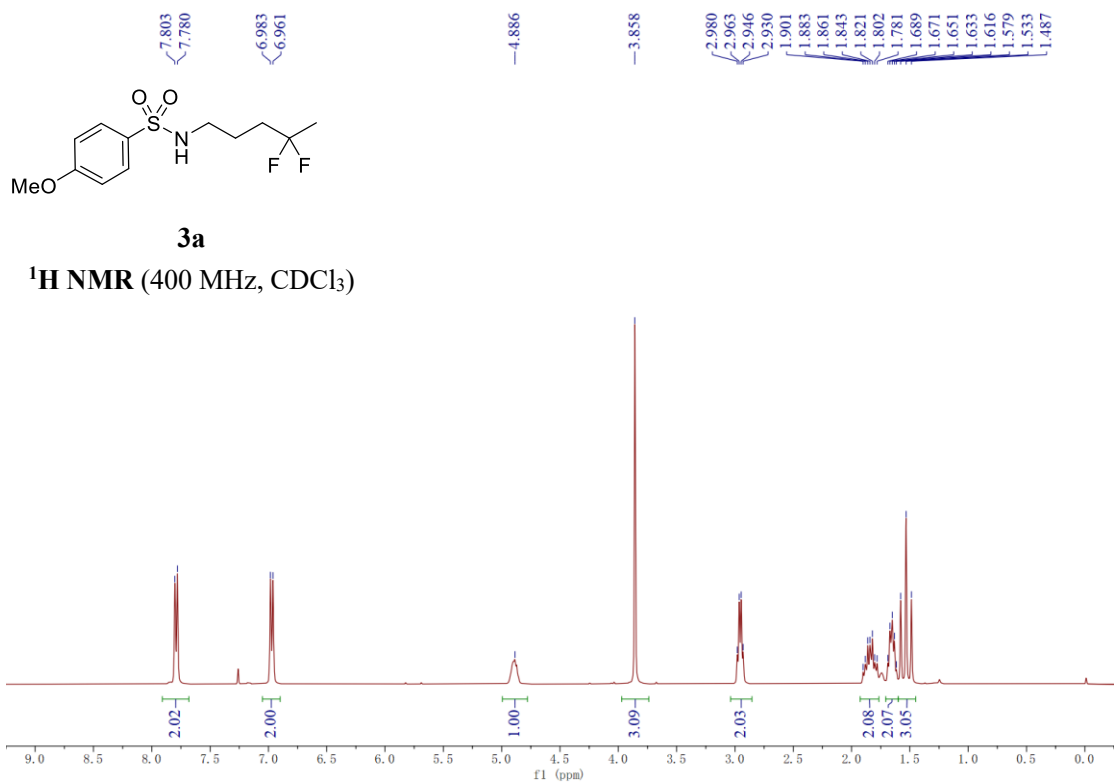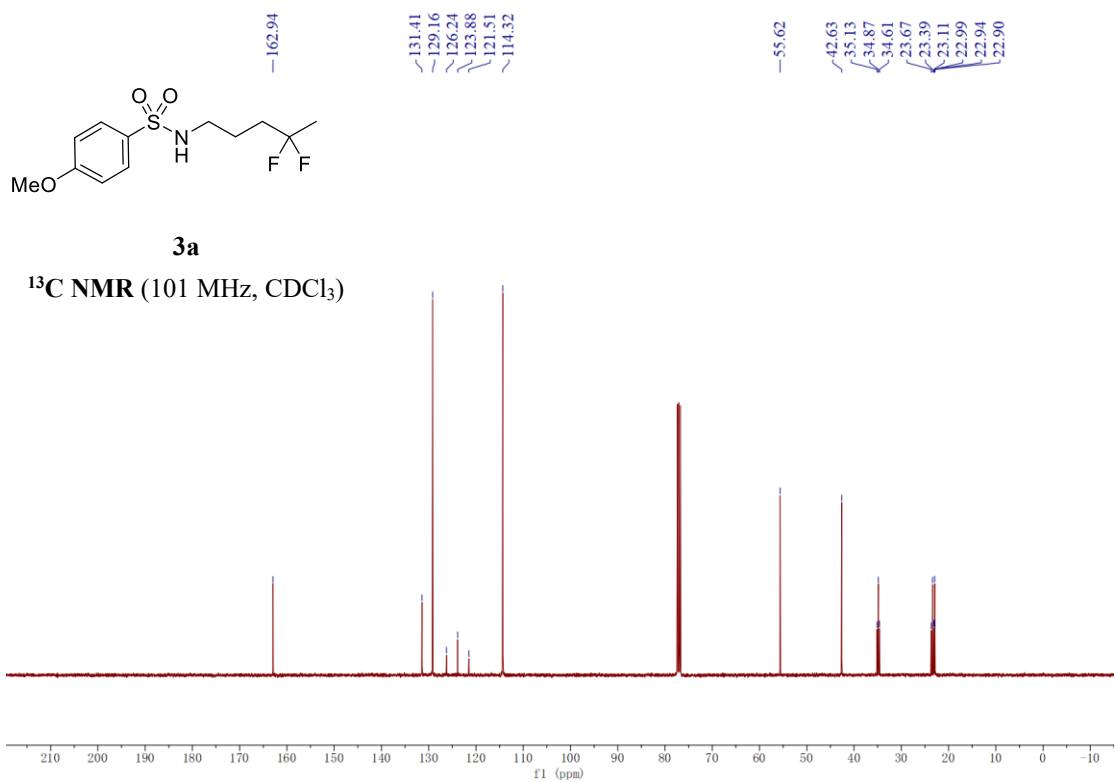

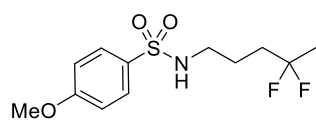

**3a**

$^{19}\text{F}$  NMR (376 MHz,  $\text{CDCl}_3$ )

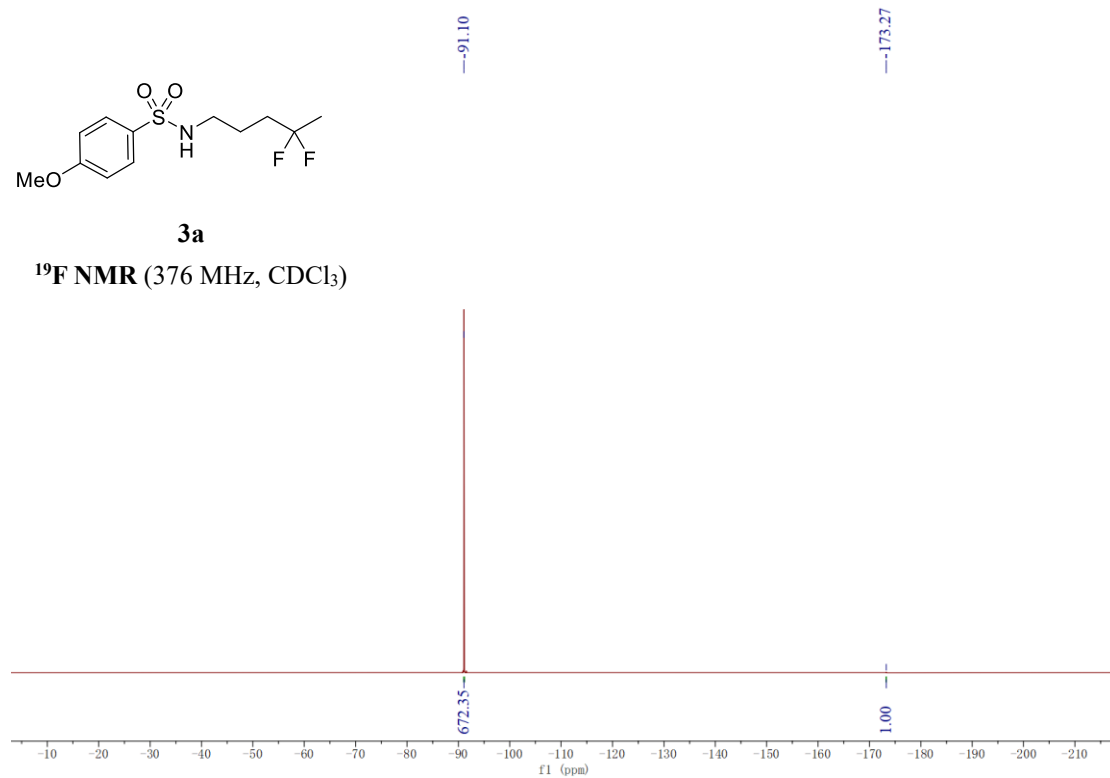

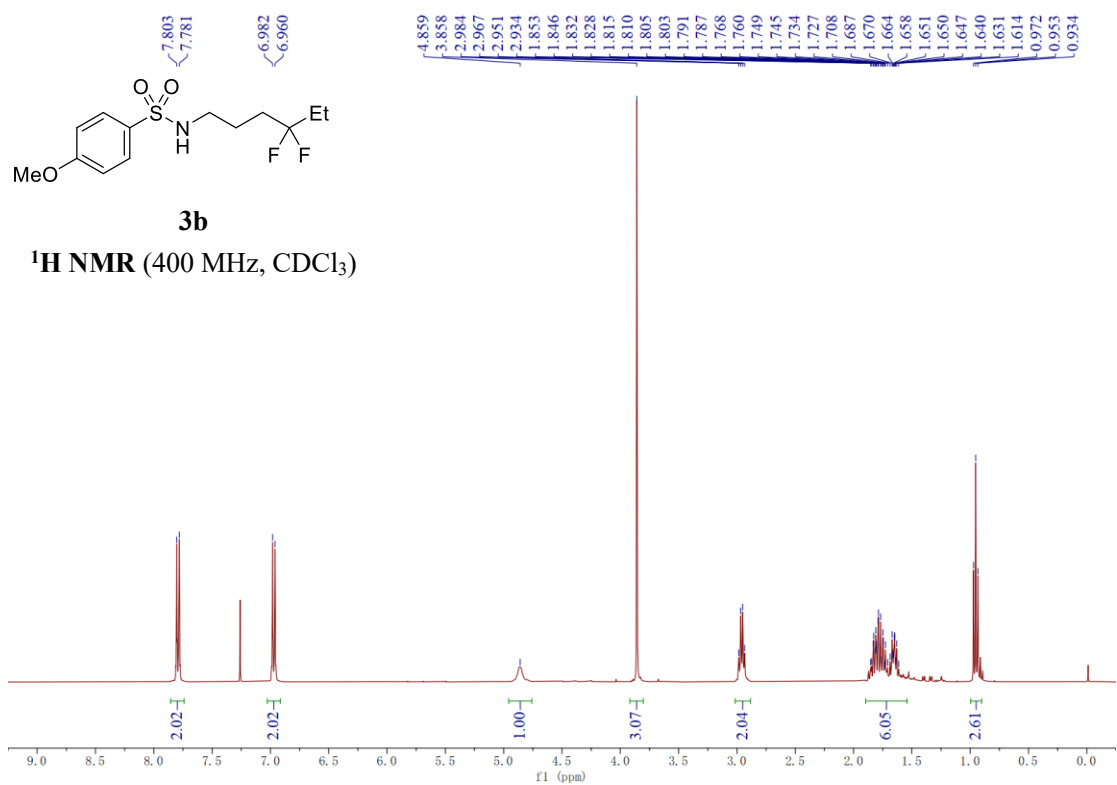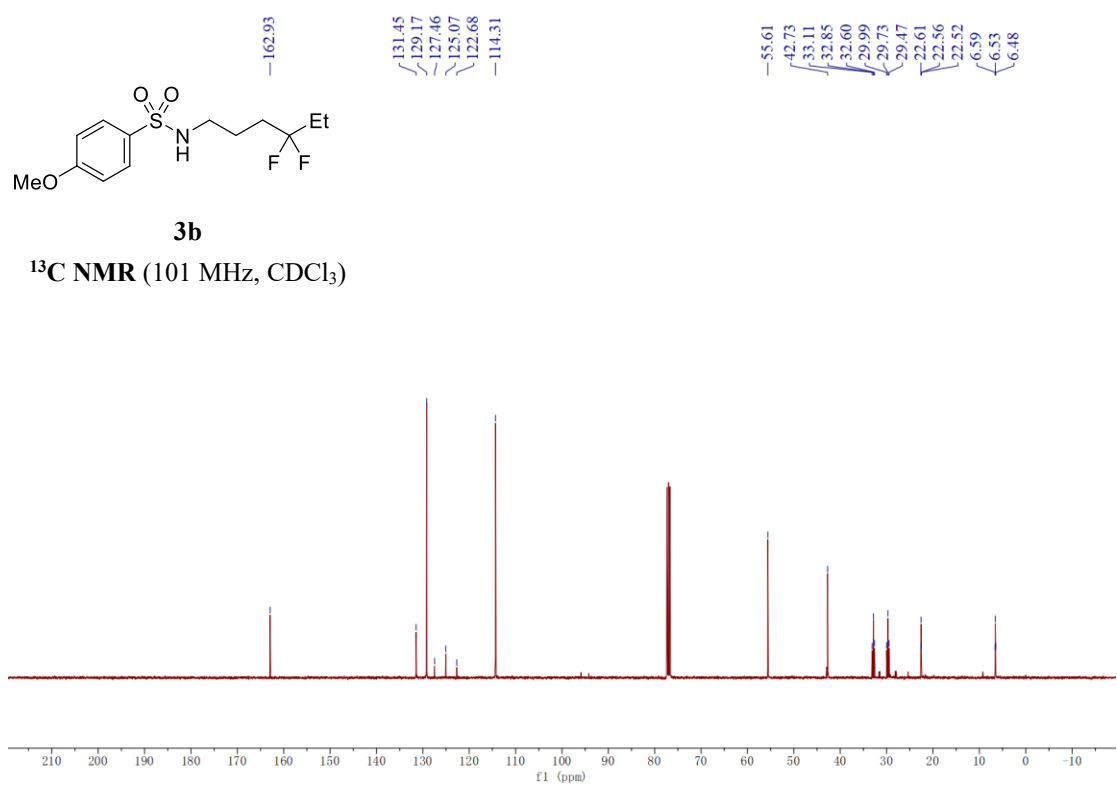

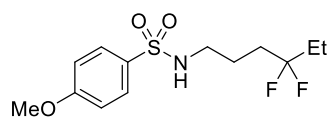

**3b**

<sup>19</sup>F NMR (376 MHz, CDCl<sub>3</sub>)

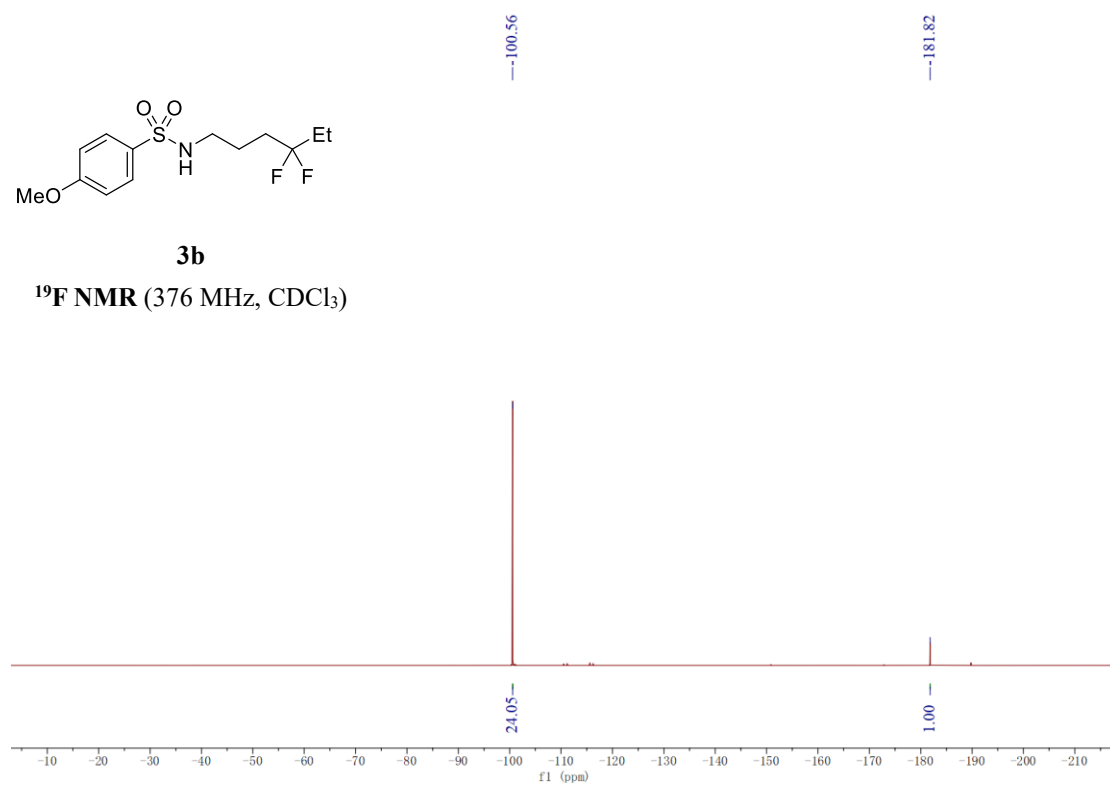

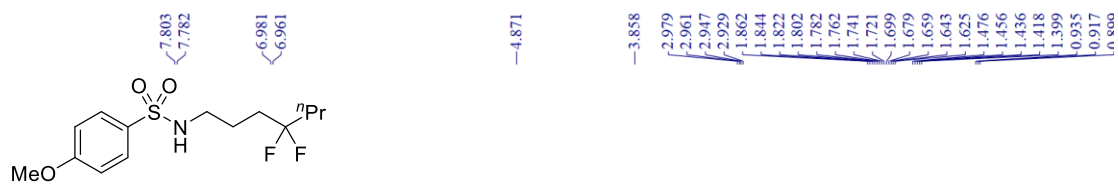

**3c**

$^1\text{H}$  NMR (400 MHz,  $\text{CDCl}_3$ )

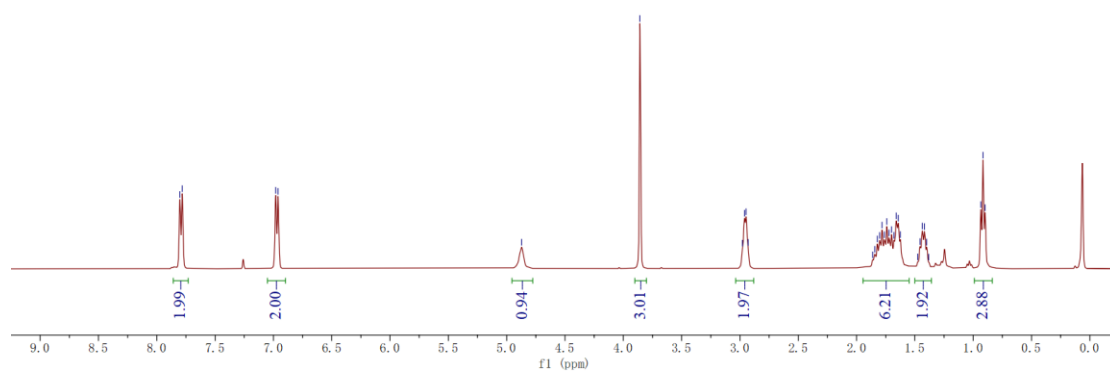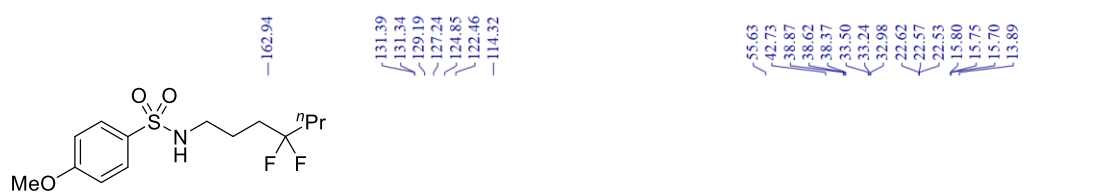

**3c**

$^{13}\text{C}$  NMR (101 MHz,  $\text{CDCl}_3$ )

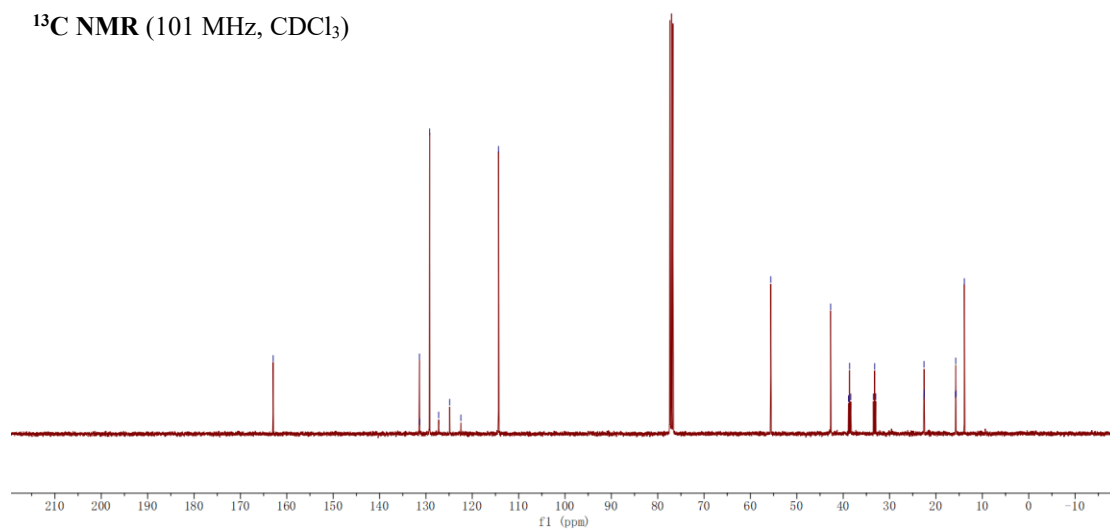

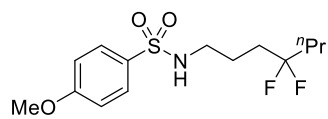

**3c**

$^{19}\text{F}$  NMR (376 MHz,  $\text{CDCl}_3$ )

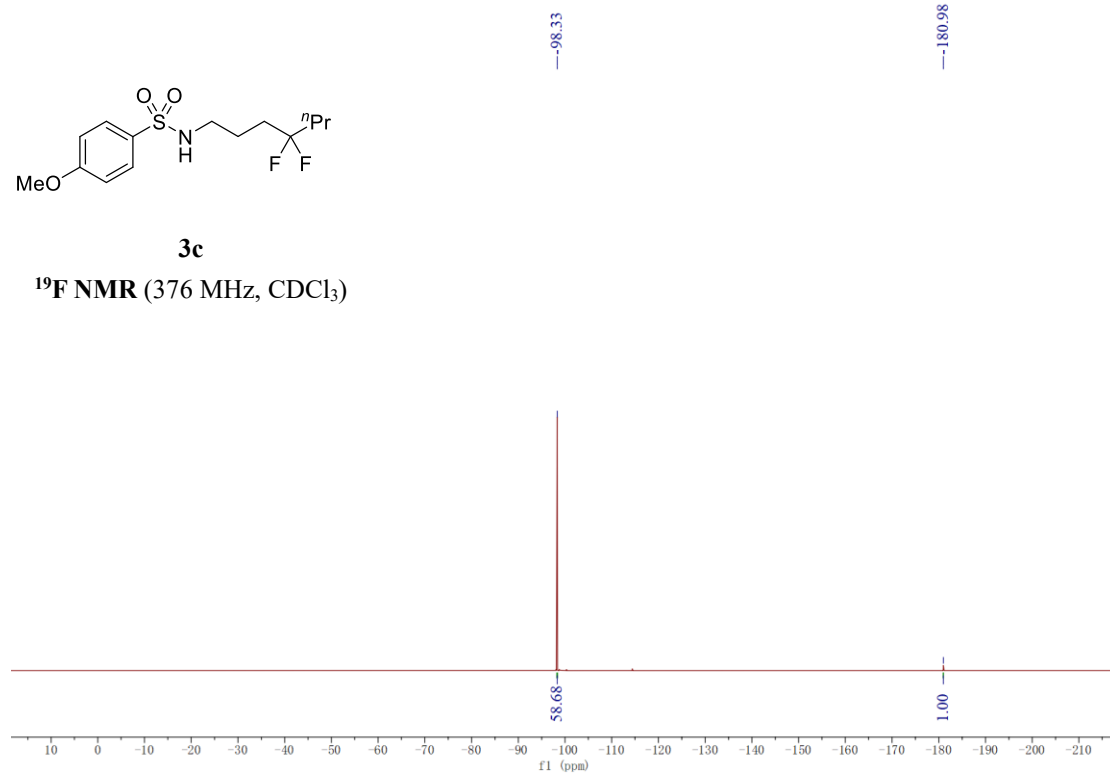

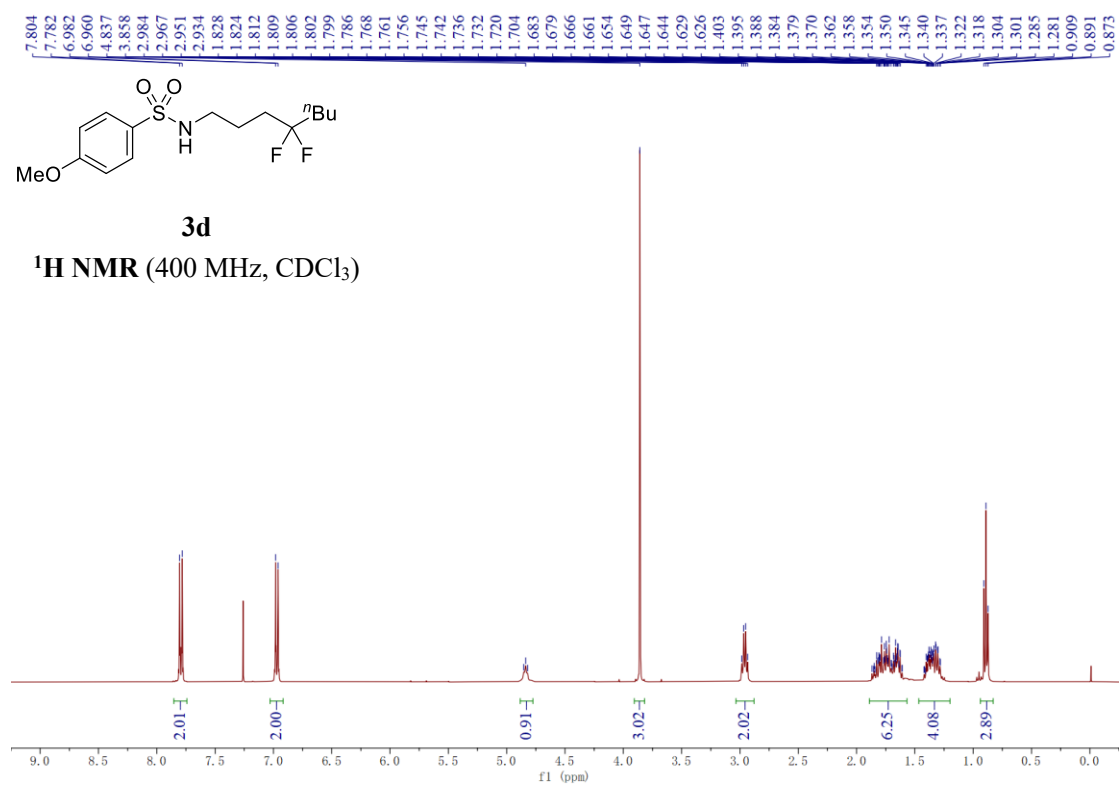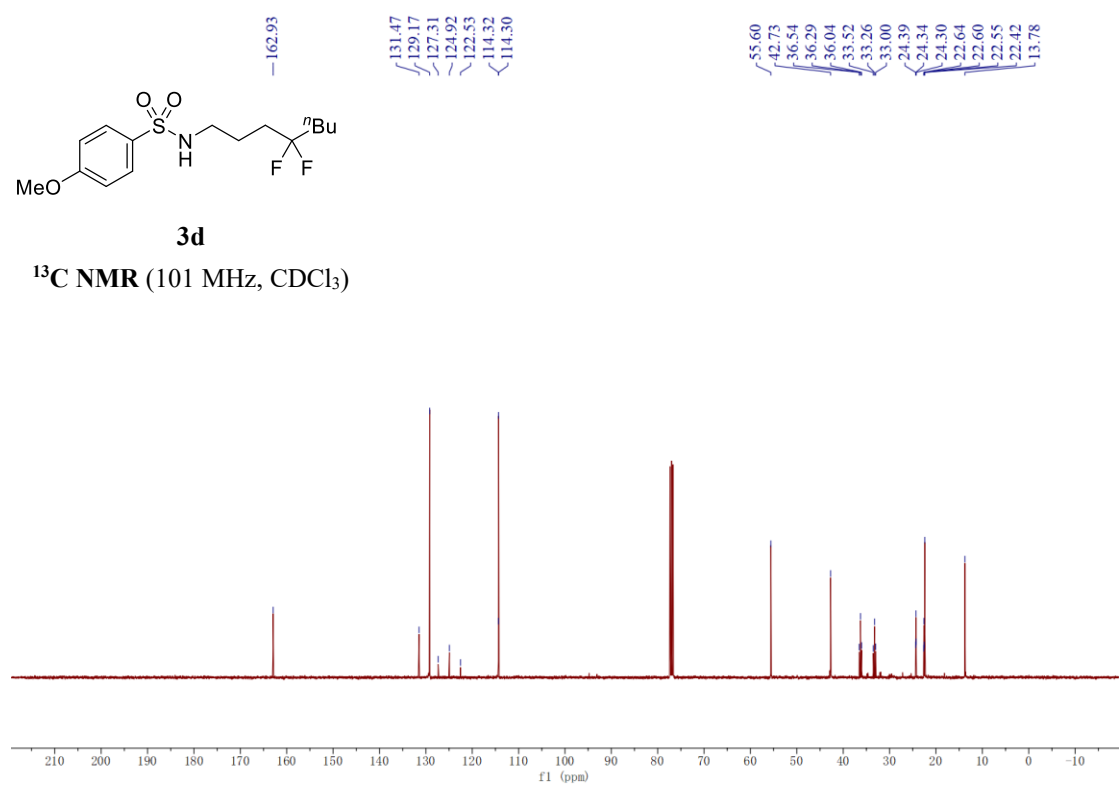

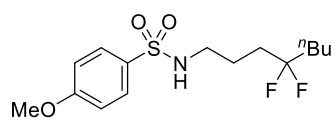

**3d**

**<sup>19</sup>F NMR (376 MHz, CDCl<sub>3</sub>)**

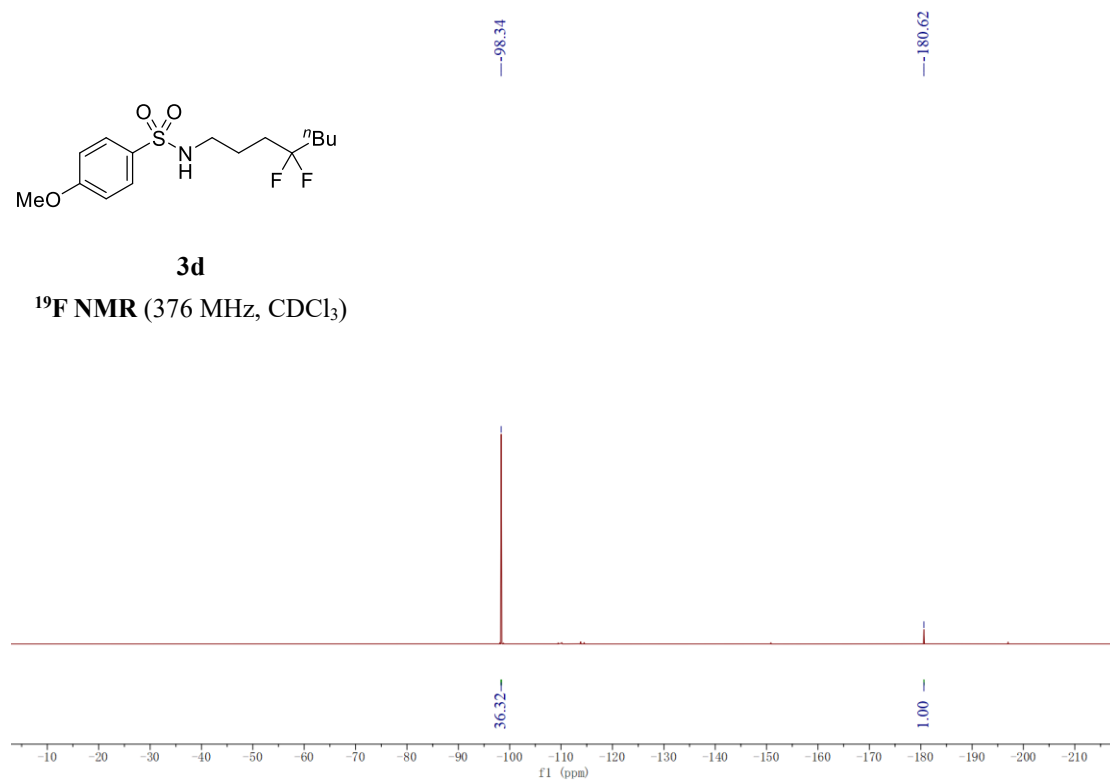



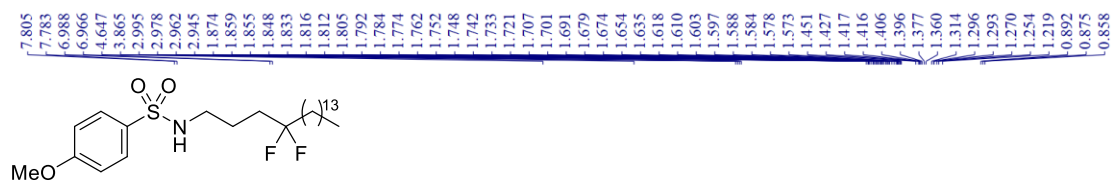

**3e**  
 $^1\text{H}$  NMR (400 MHz,  $\text{CDCl}_3$ )

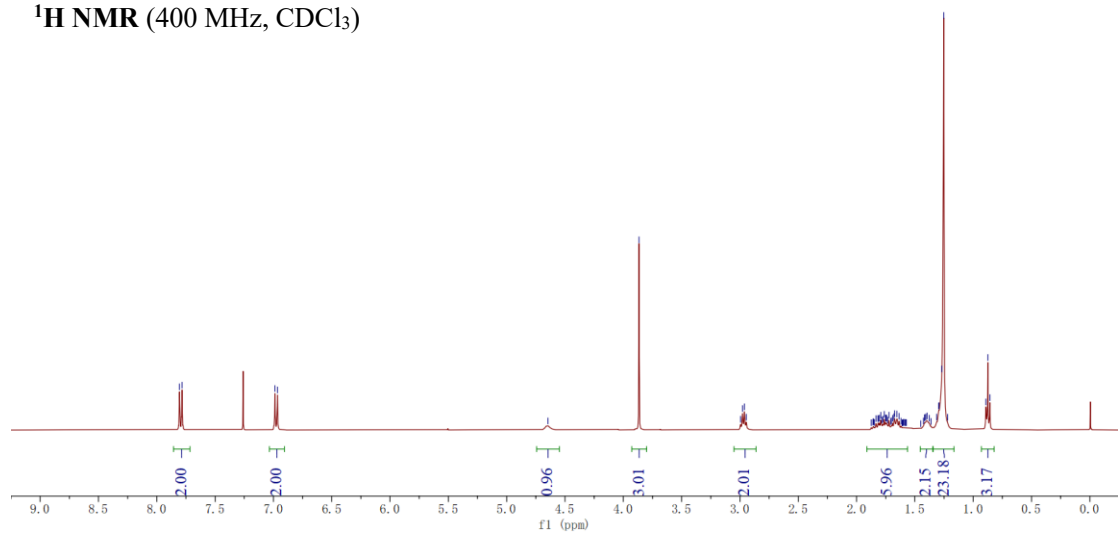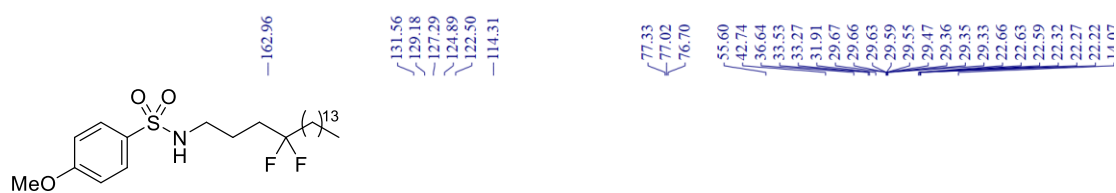

**3e**  
 $^{13}\text{C}$  NMR (101 MHz,  $\text{CDCl}_3$ )

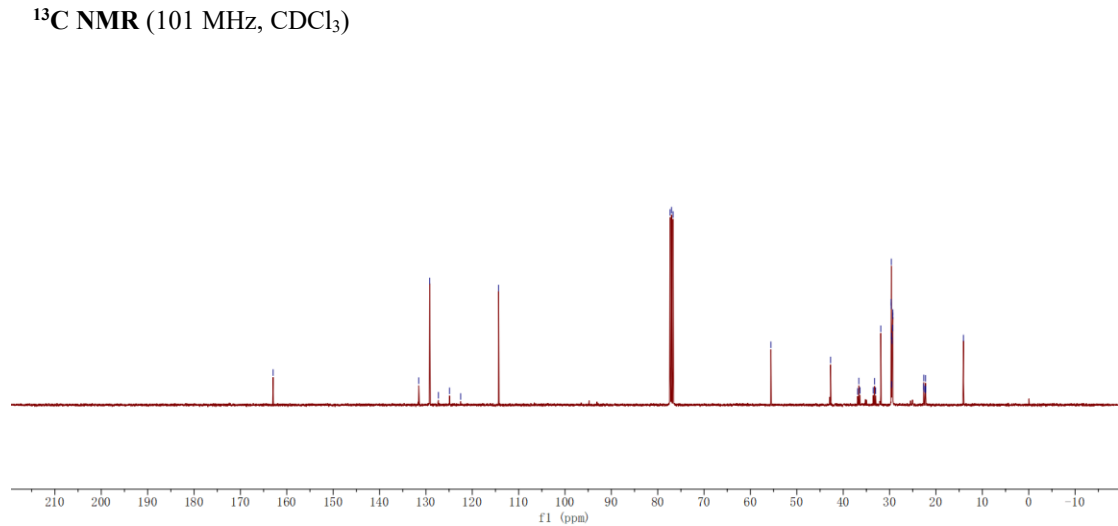

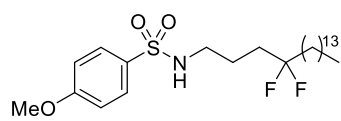

**3e**

**<sup>19</sup>F NMR (376 MHz, CDCl<sub>3</sub>)**

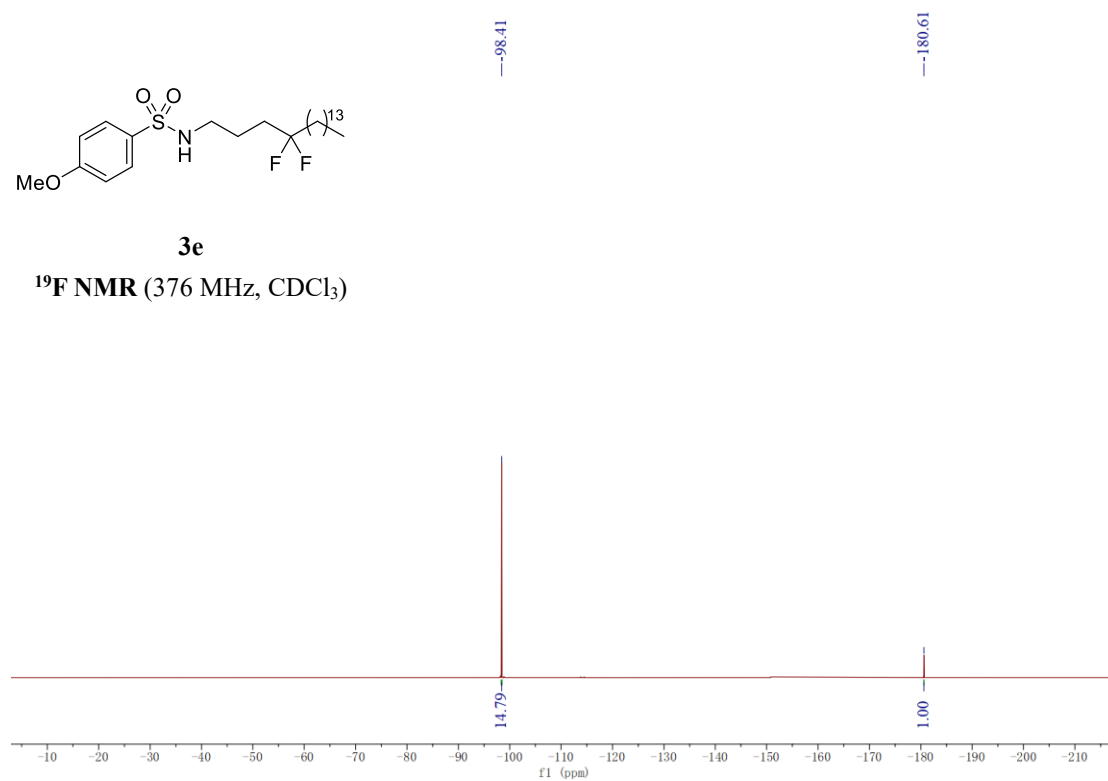

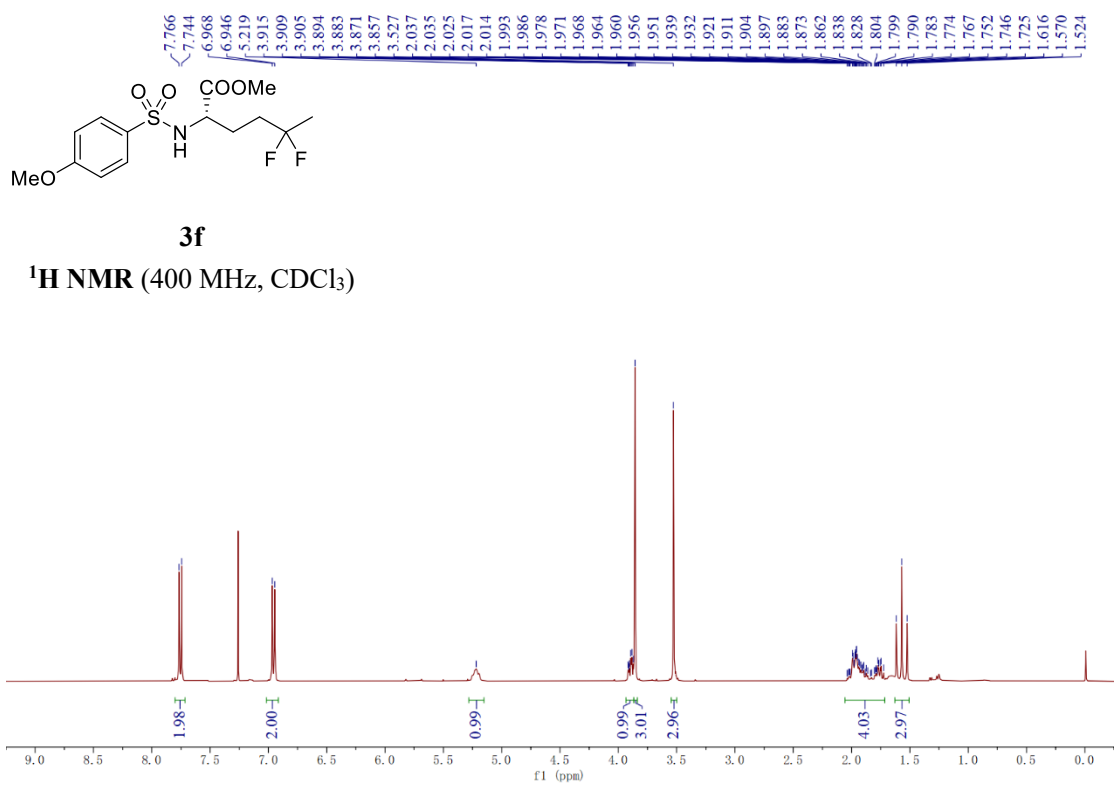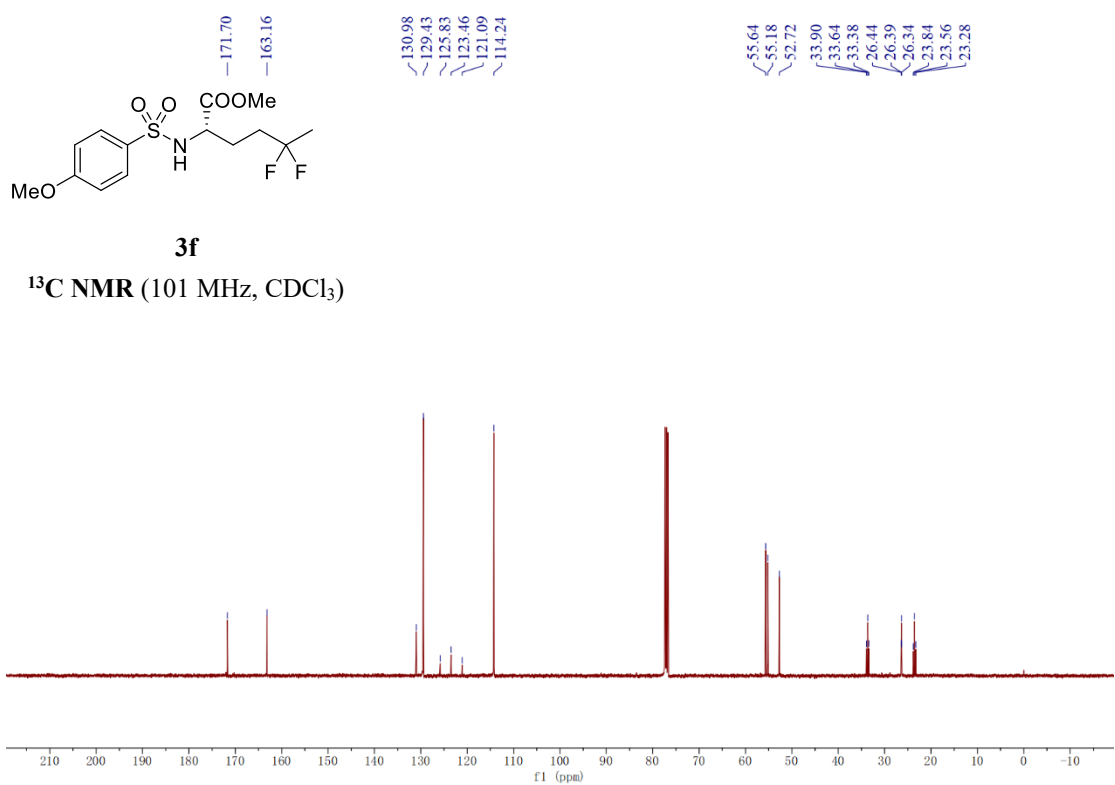

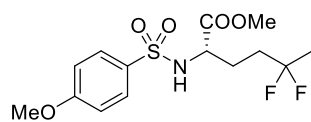

**3f**

**$^{19}\text{F}$  NMR (376 MHz,  $\text{CDCl}_3$ )**

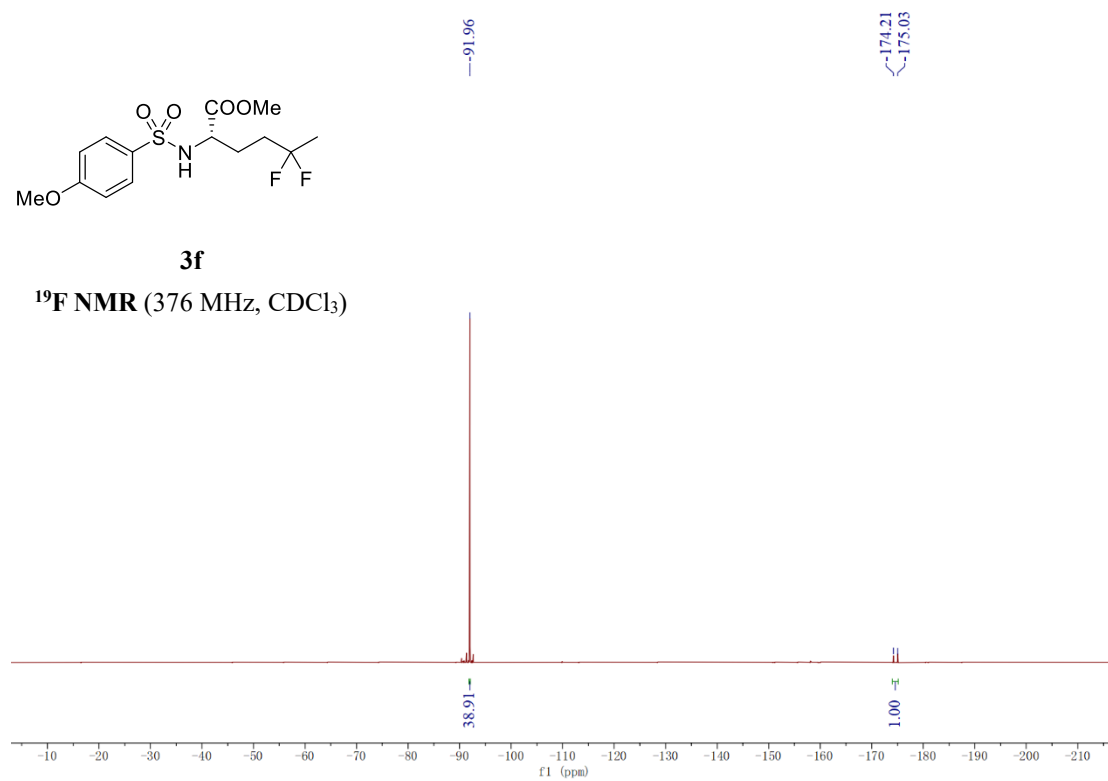

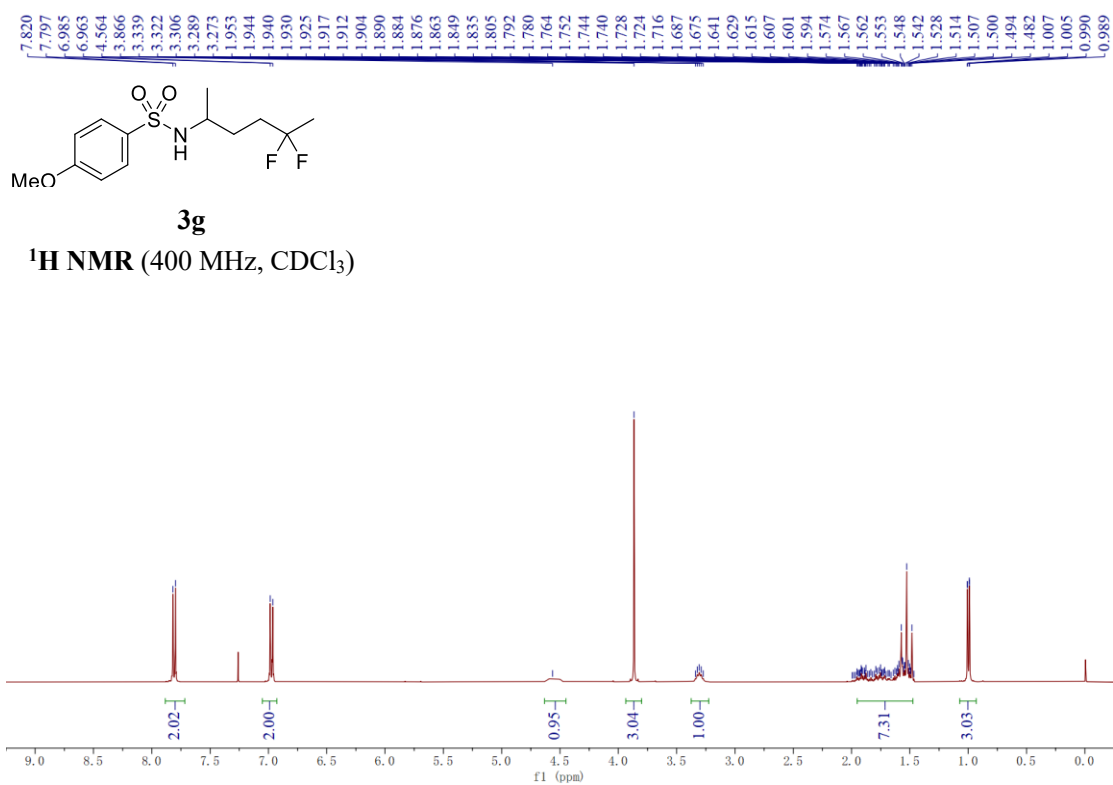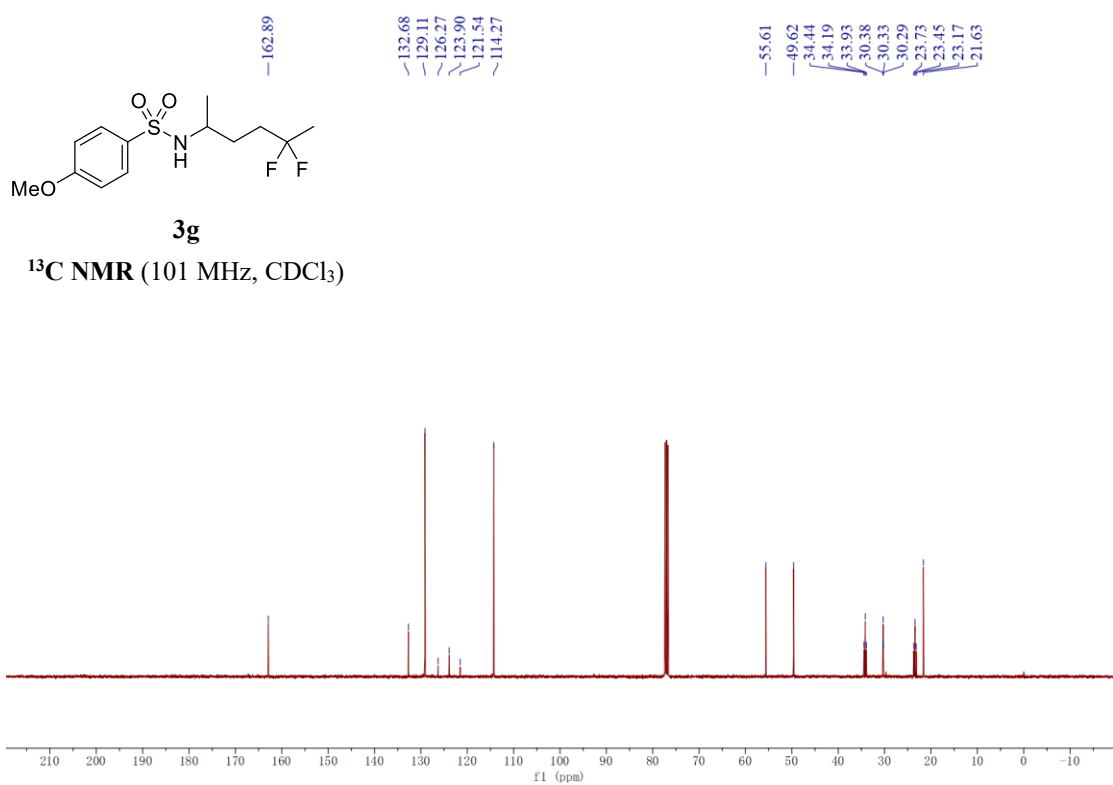

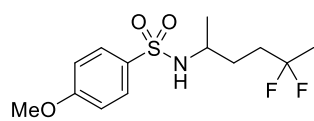

**3g**

**<sup>19</sup>F NMR (376 MHz, CDCl<sub>3</sub>)**

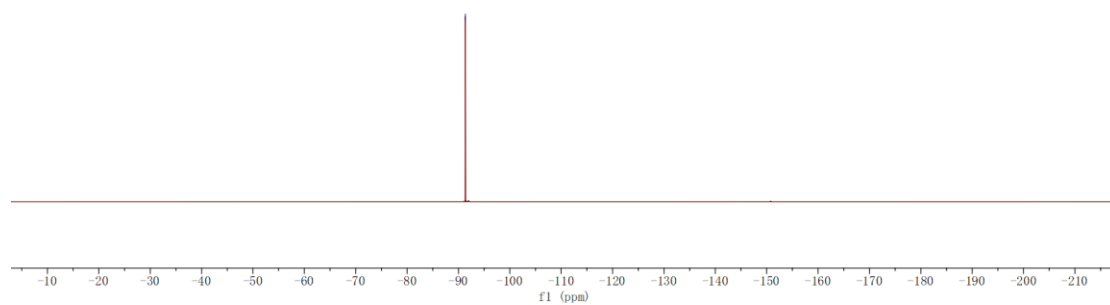

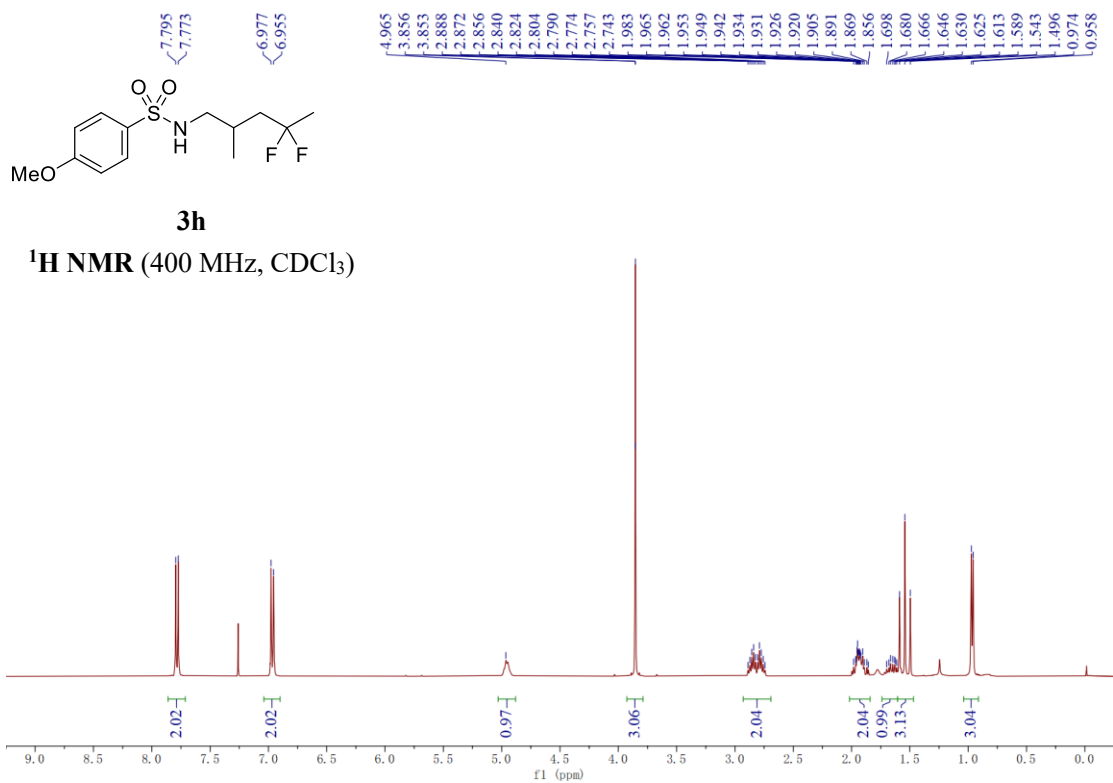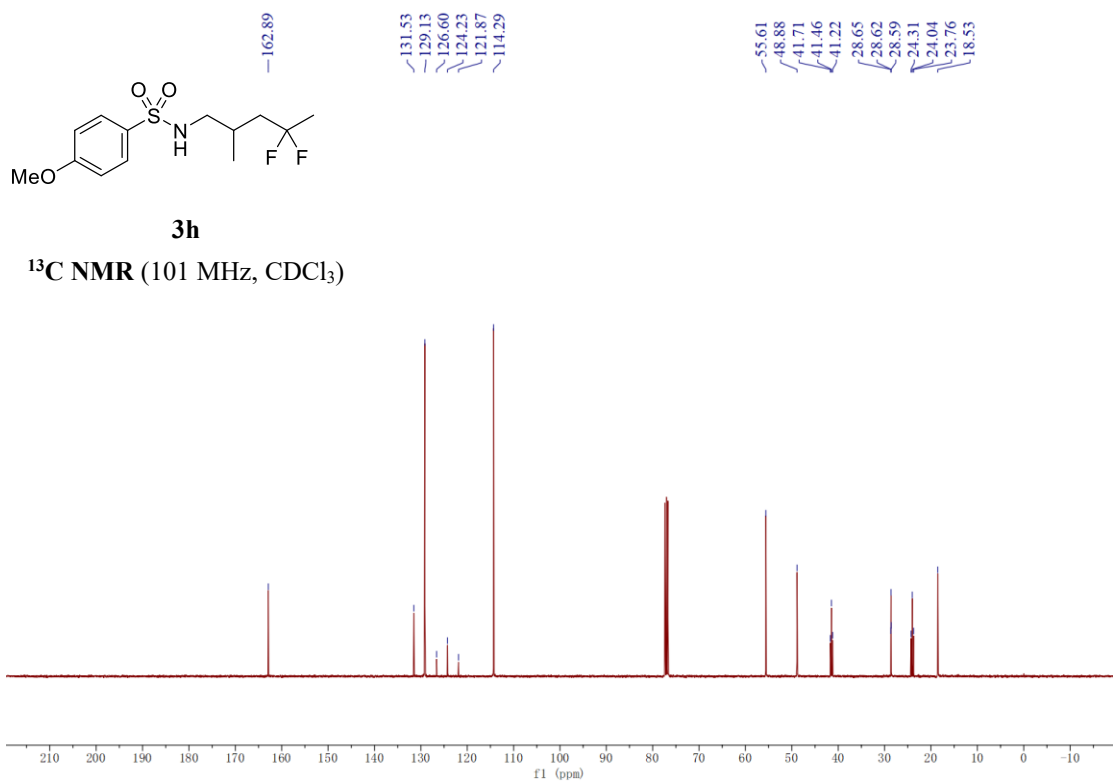

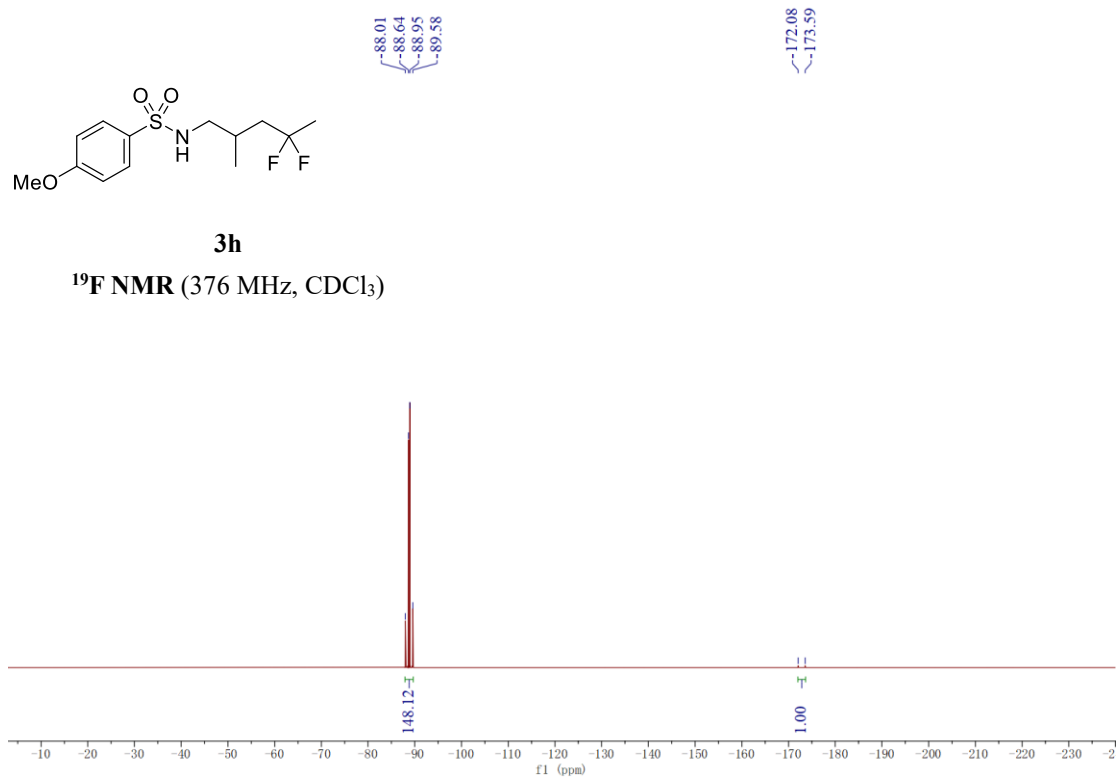



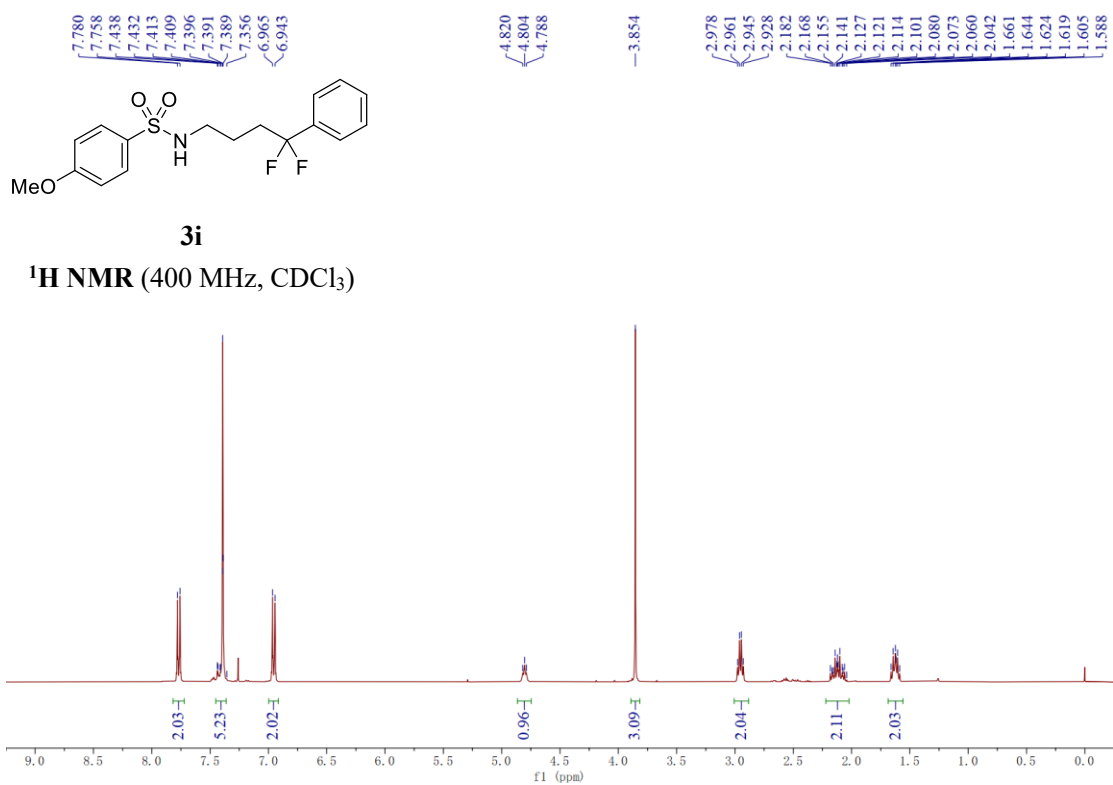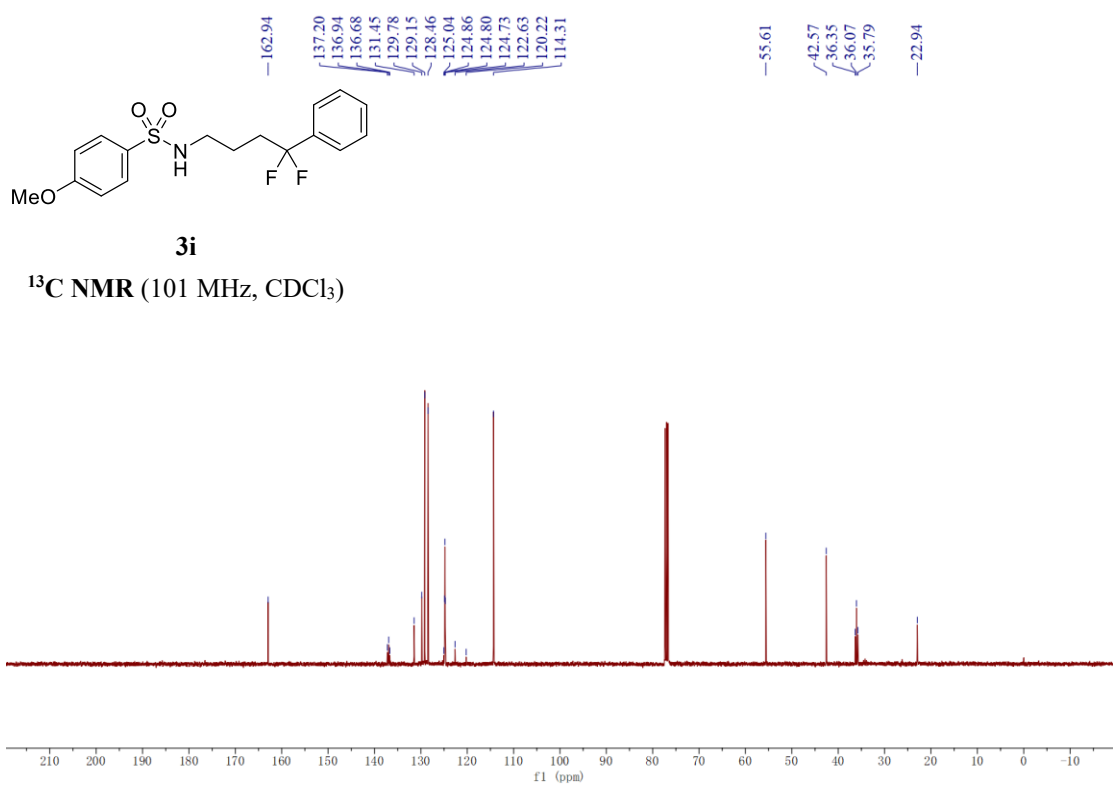

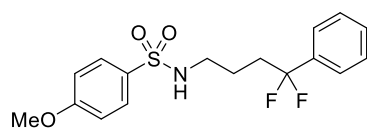

**3i**

**$^{19}\text{F}$  NMR (376 MHz,  $\text{CDCl}_3$ )**

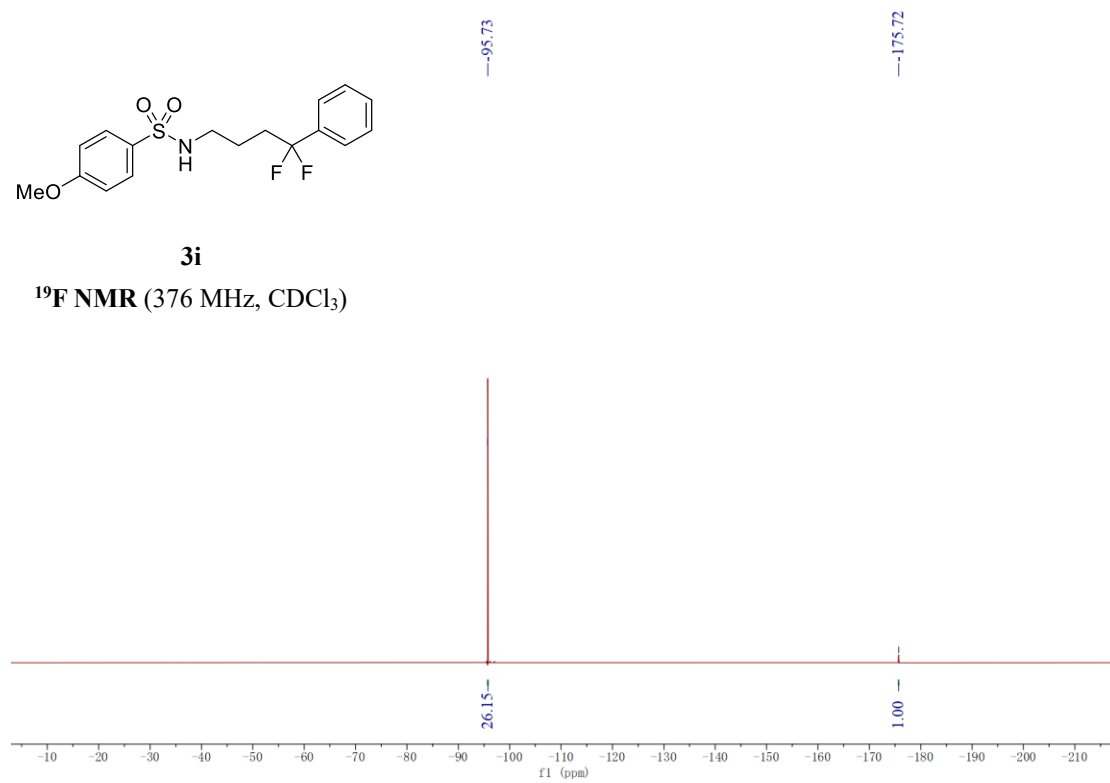

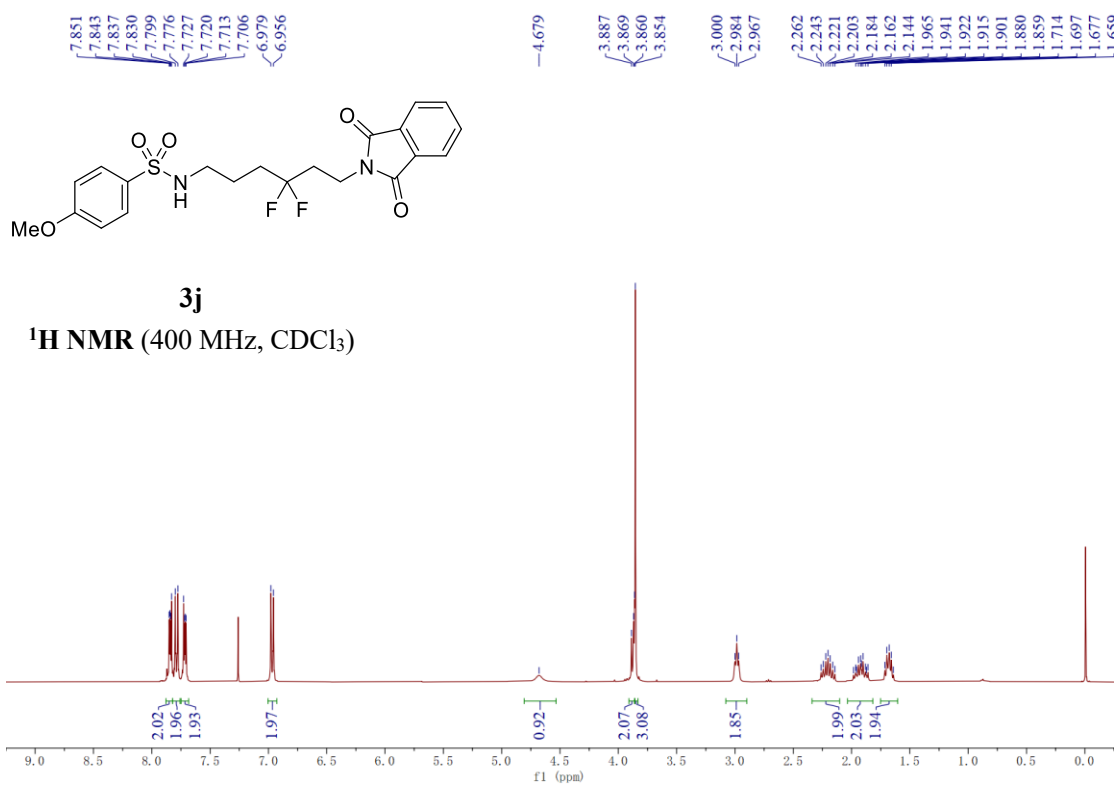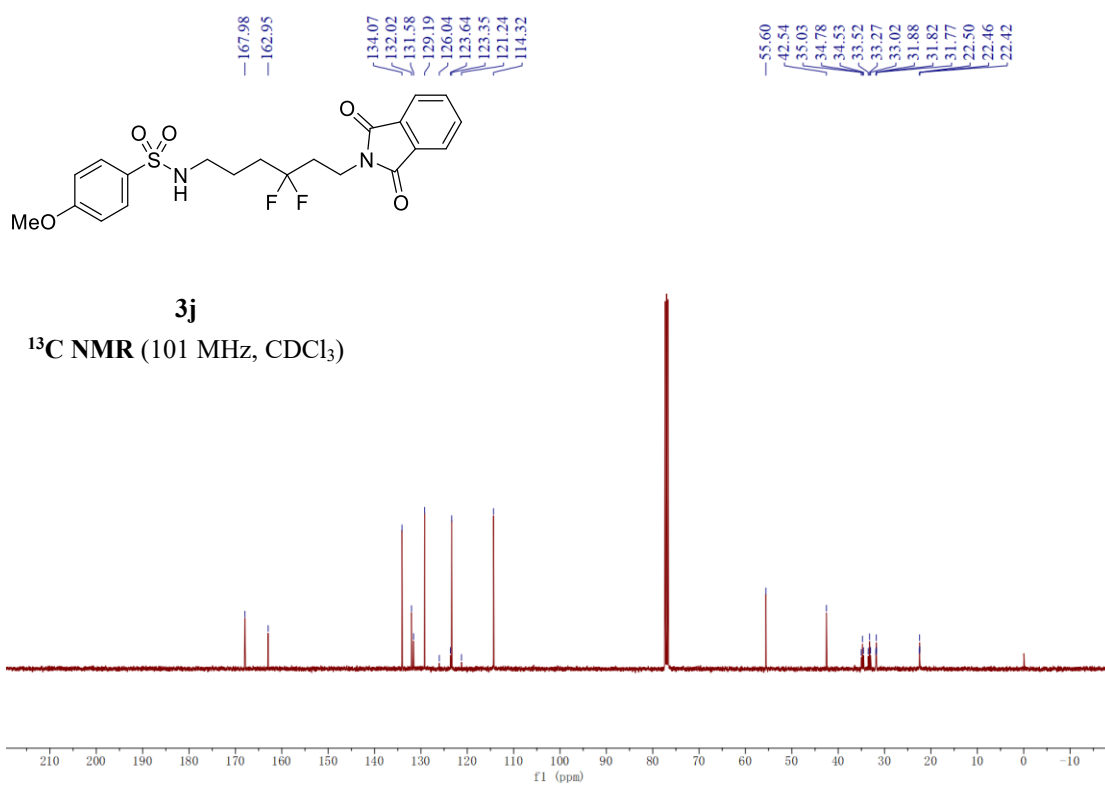

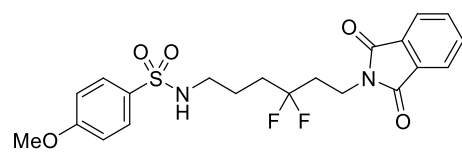

**3j**

**<sup>19</sup>F NMR** (376 MHz, CDCl<sub>3</sub>)

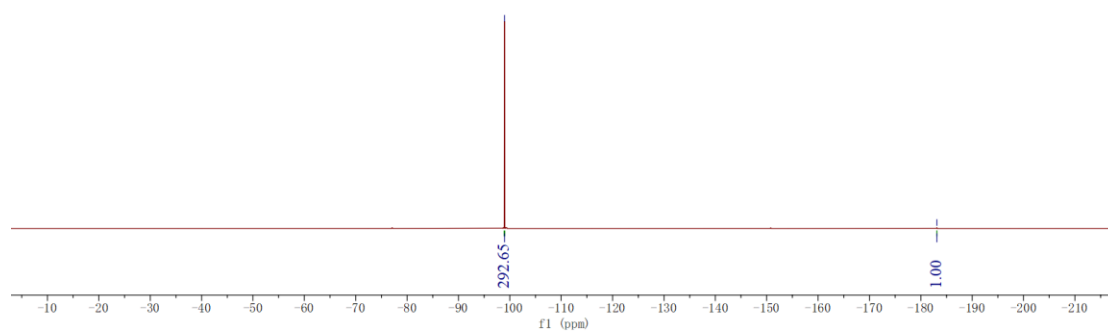

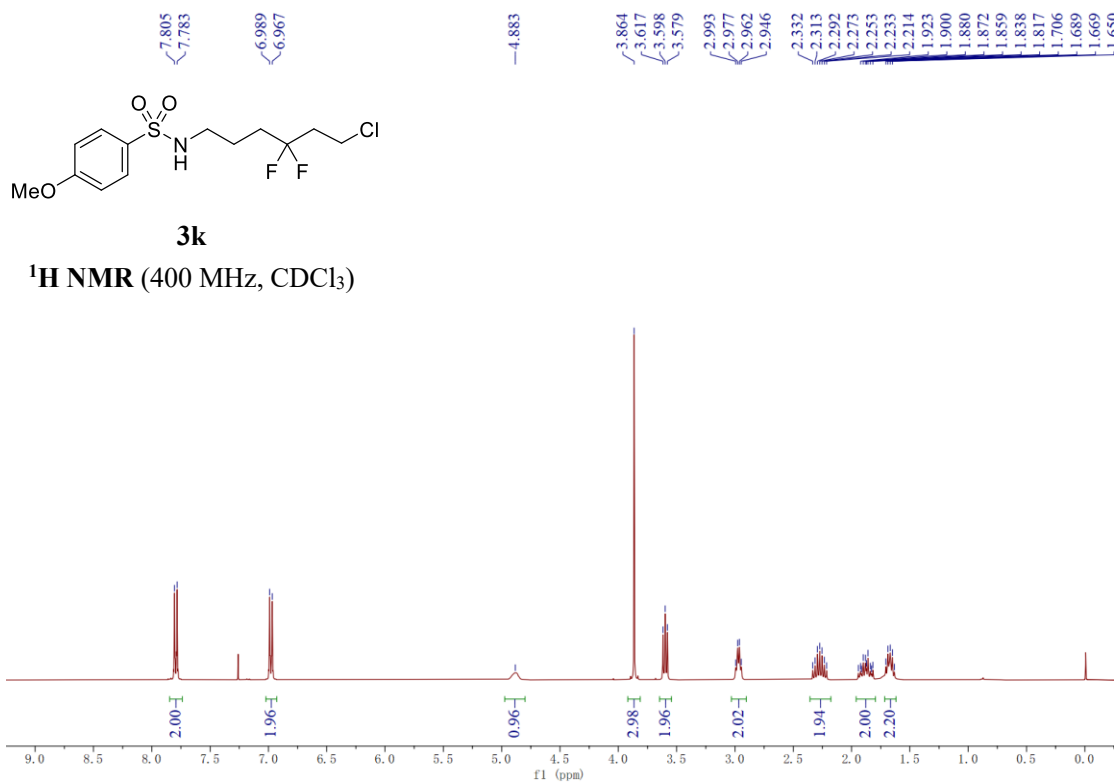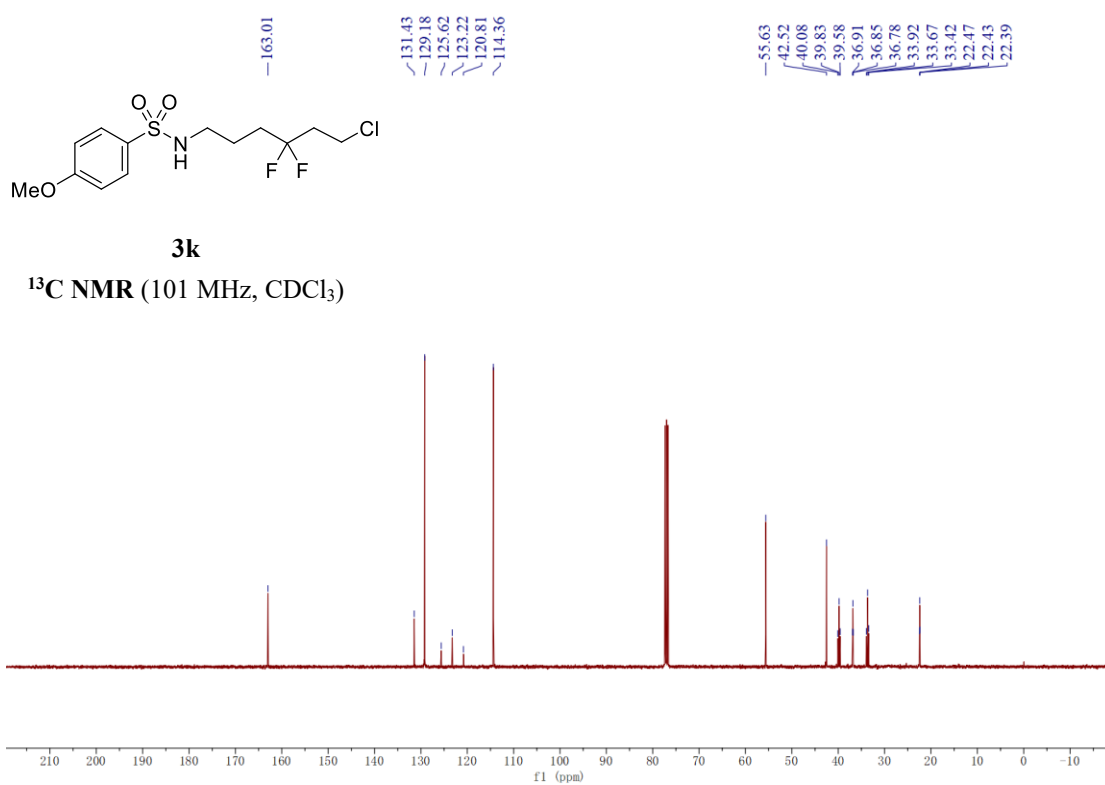

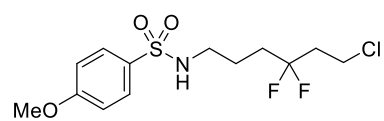

**3k**

**<sup>19</sup>F NMR (376 MHz, CDCl<sub>3</sub>)**

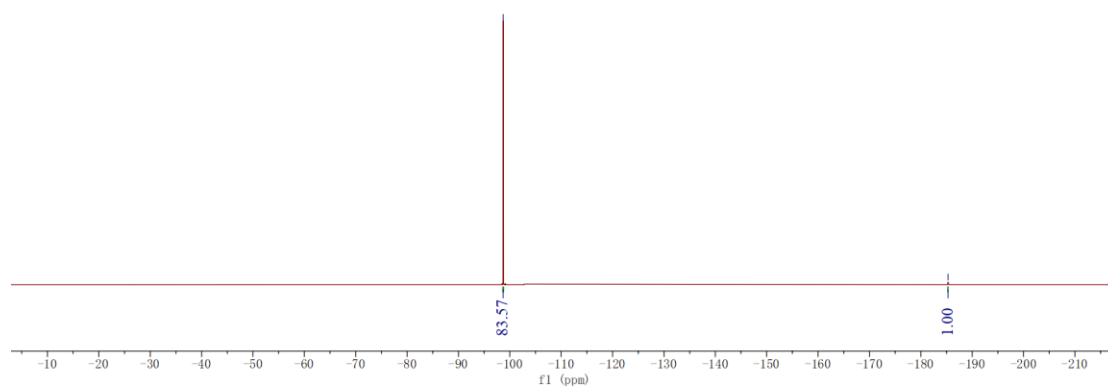

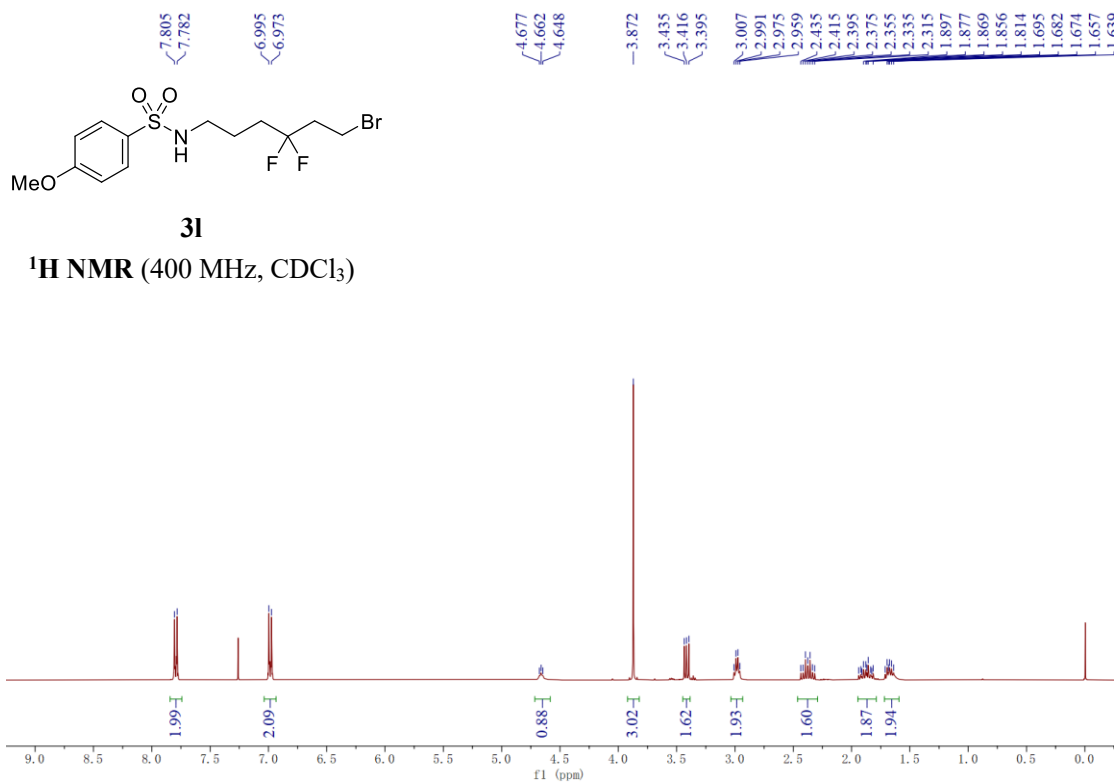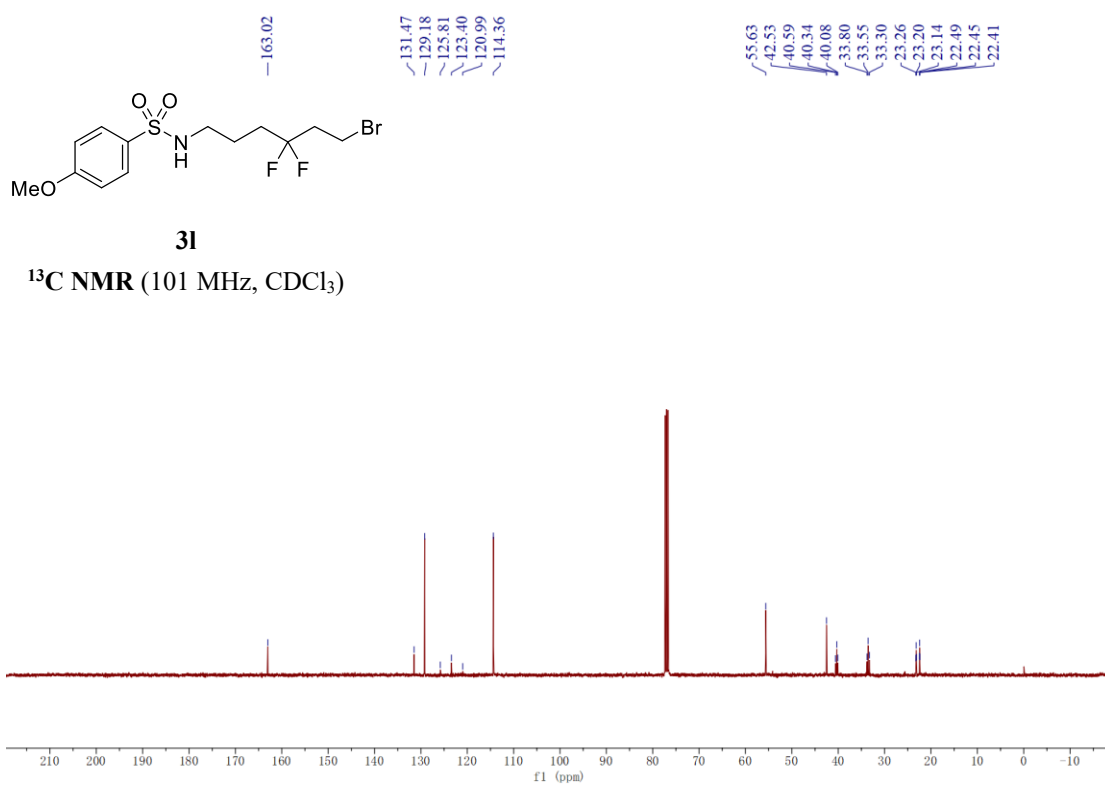

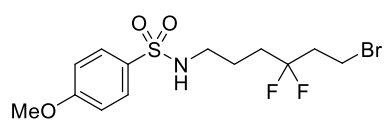

**31**

**<sup>19</sup>F NMR (376 MHz, CDCl<sub>3</sub>)**

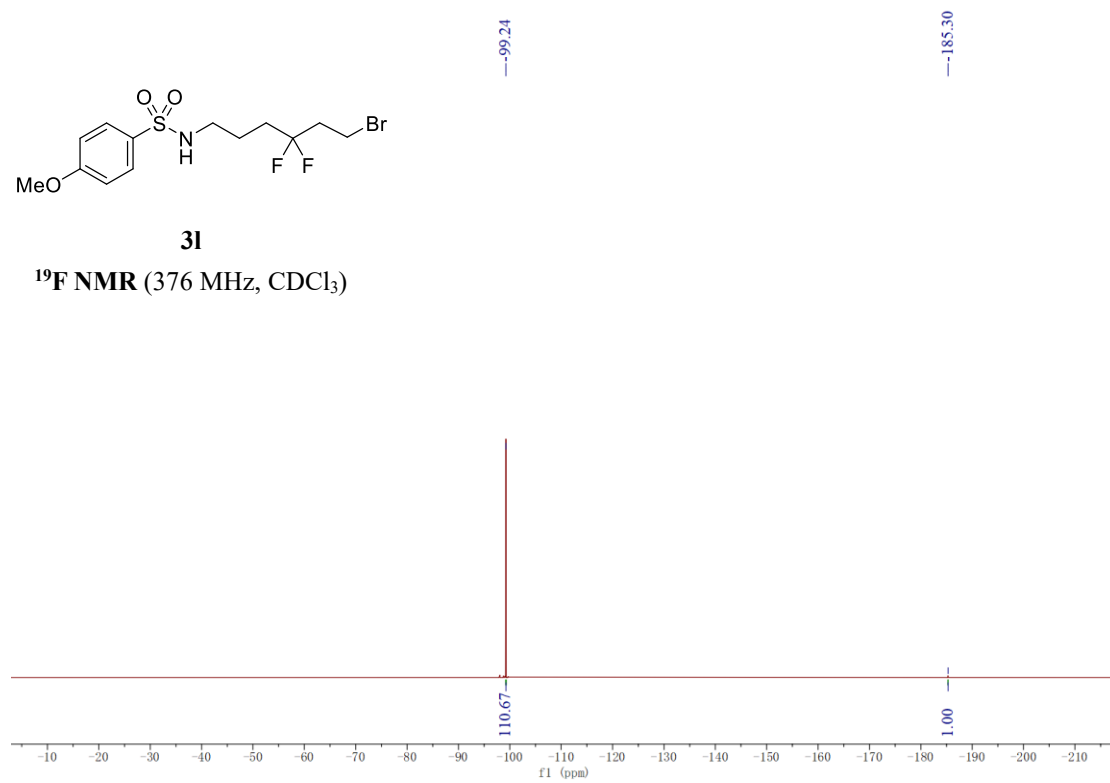



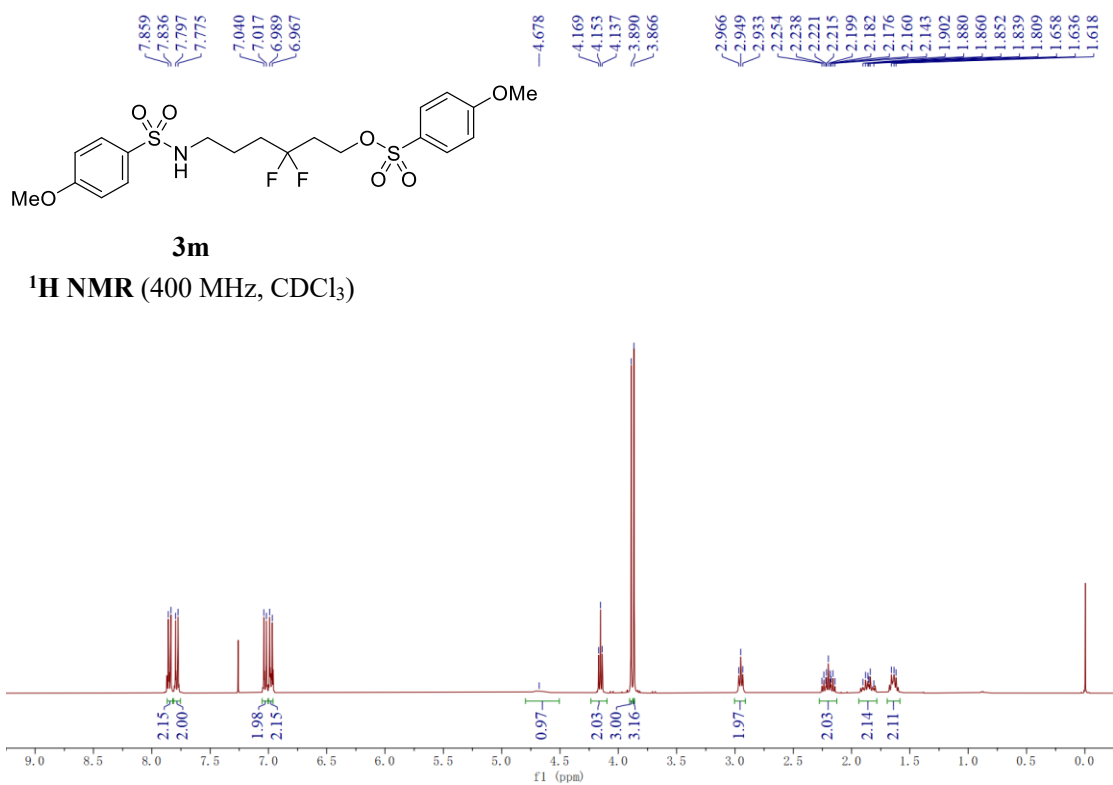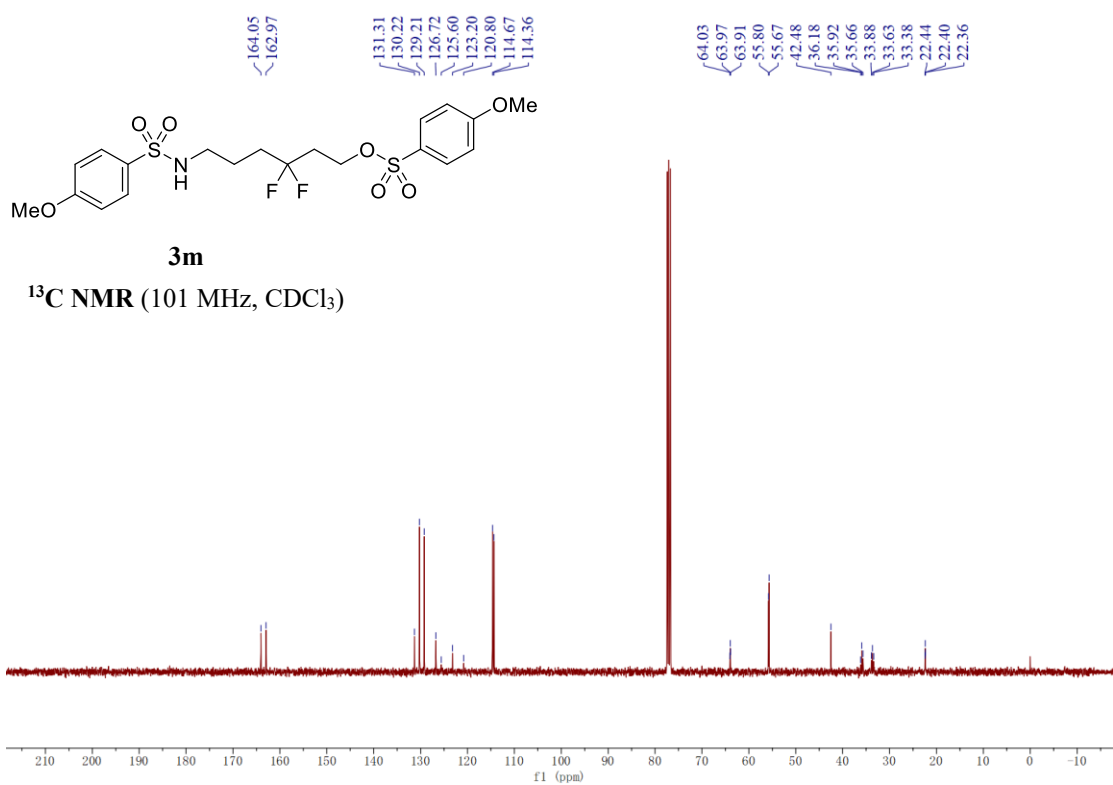

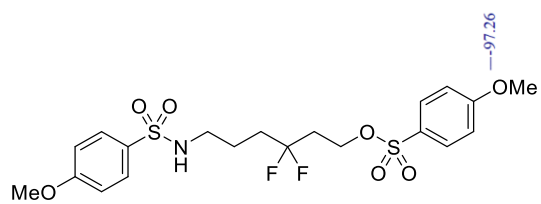

**3m**

**$^{19}\text{F}$  NMR (376 MHz,  $\text{CDCl}_3$ )**

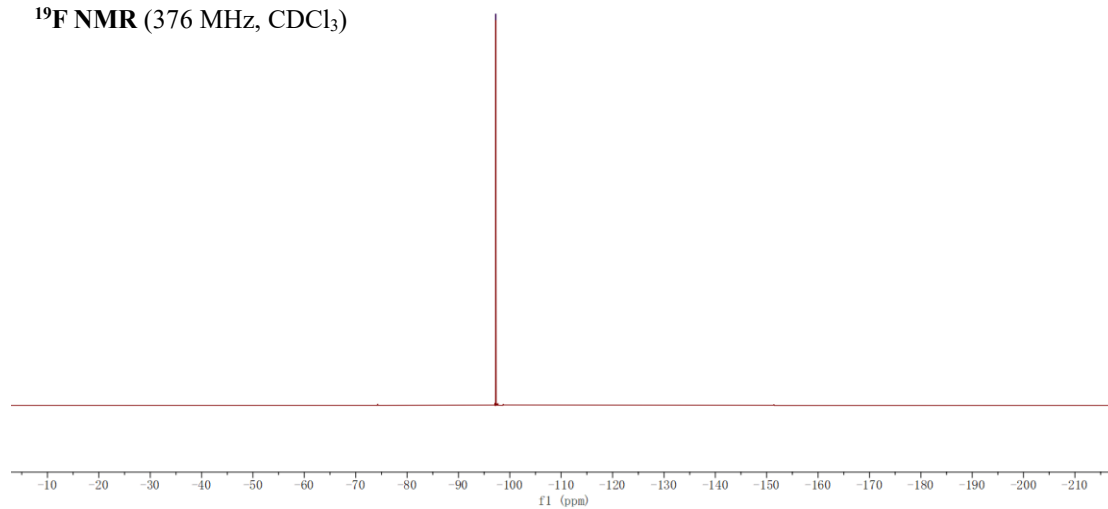

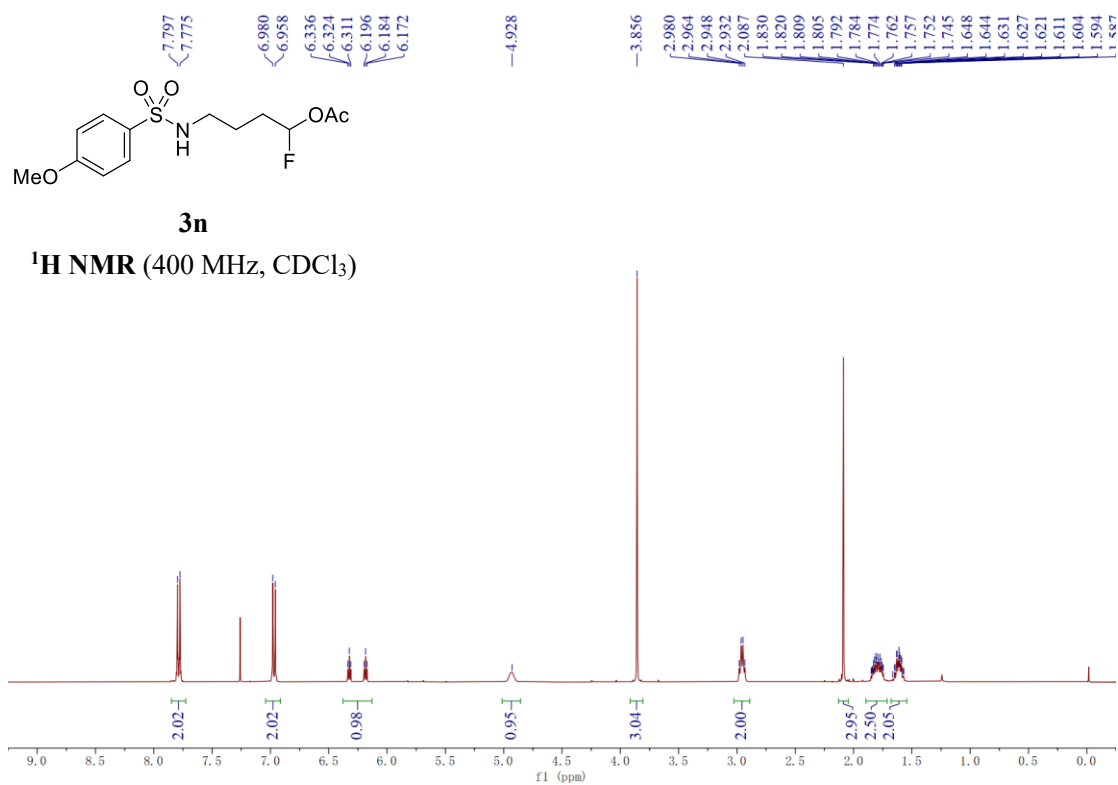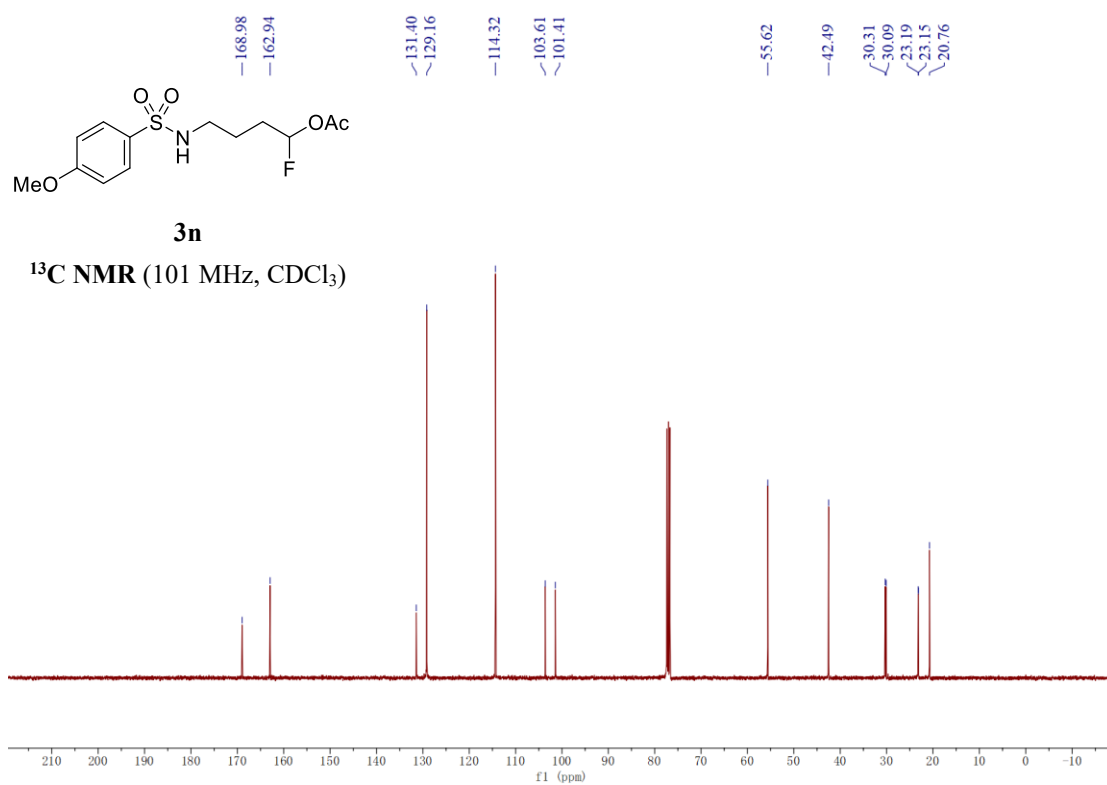

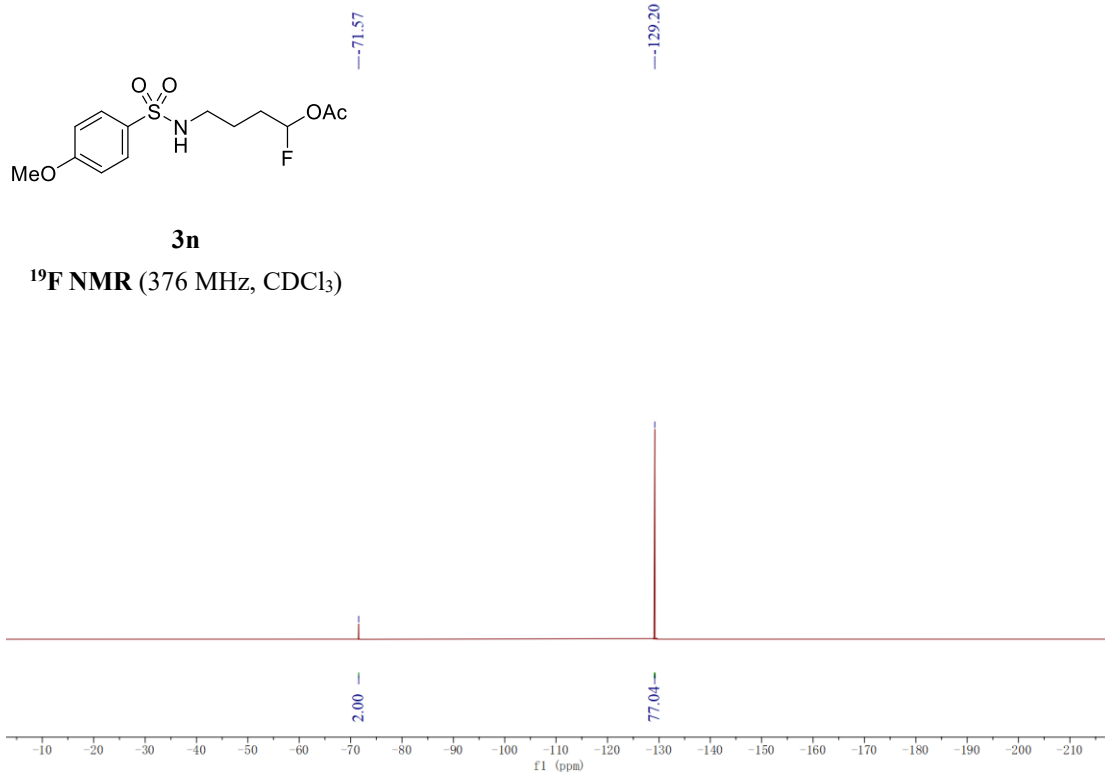

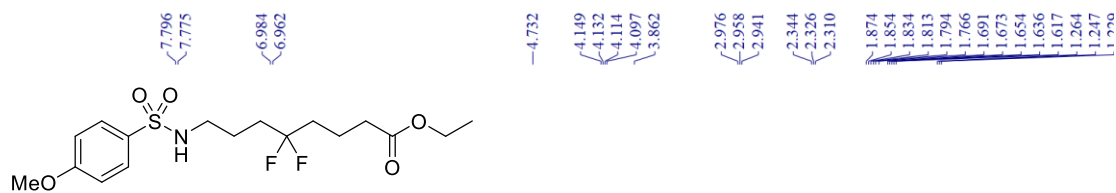

**3o**

$^1\text{H}$  NMR (400 MHz,  $\text{CDCl}_3$ )

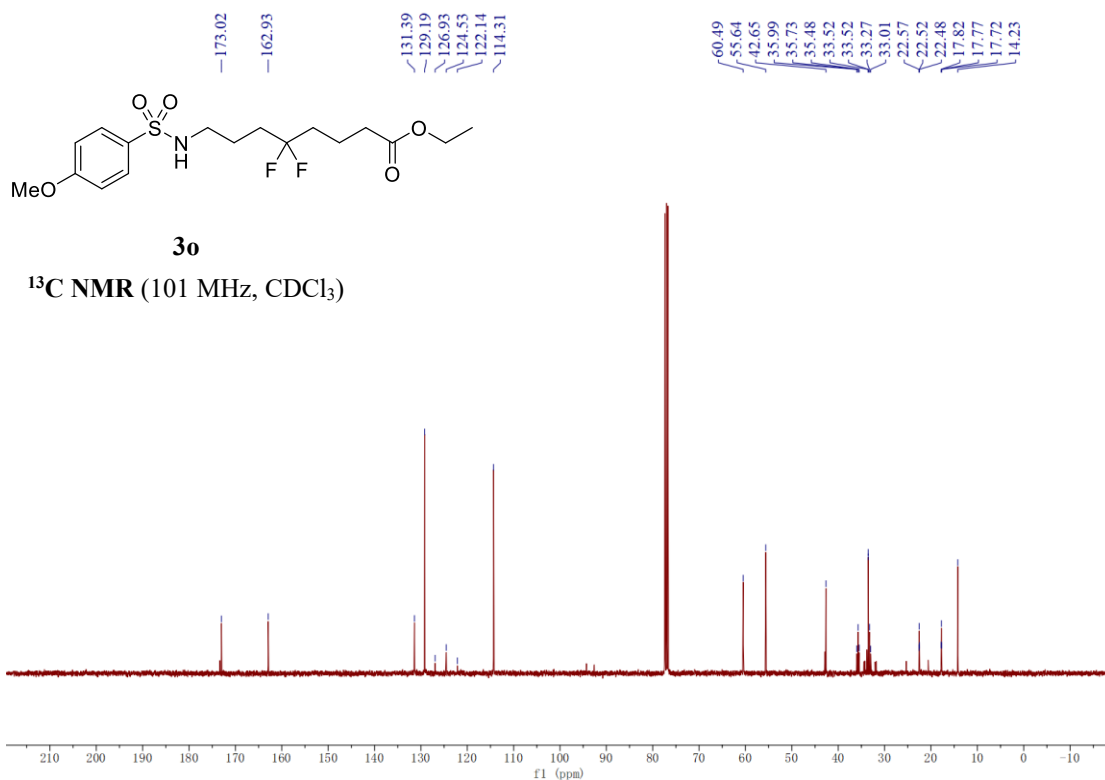

**3o**

$^{13}\text{C}$  NMR (101 MHz,  $\text{CDCl}_3$ )

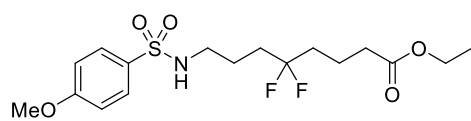

**30**

**$^{19}\text{F}$  NMR (376 MHz,  $\text{CDCl}_3$ )**

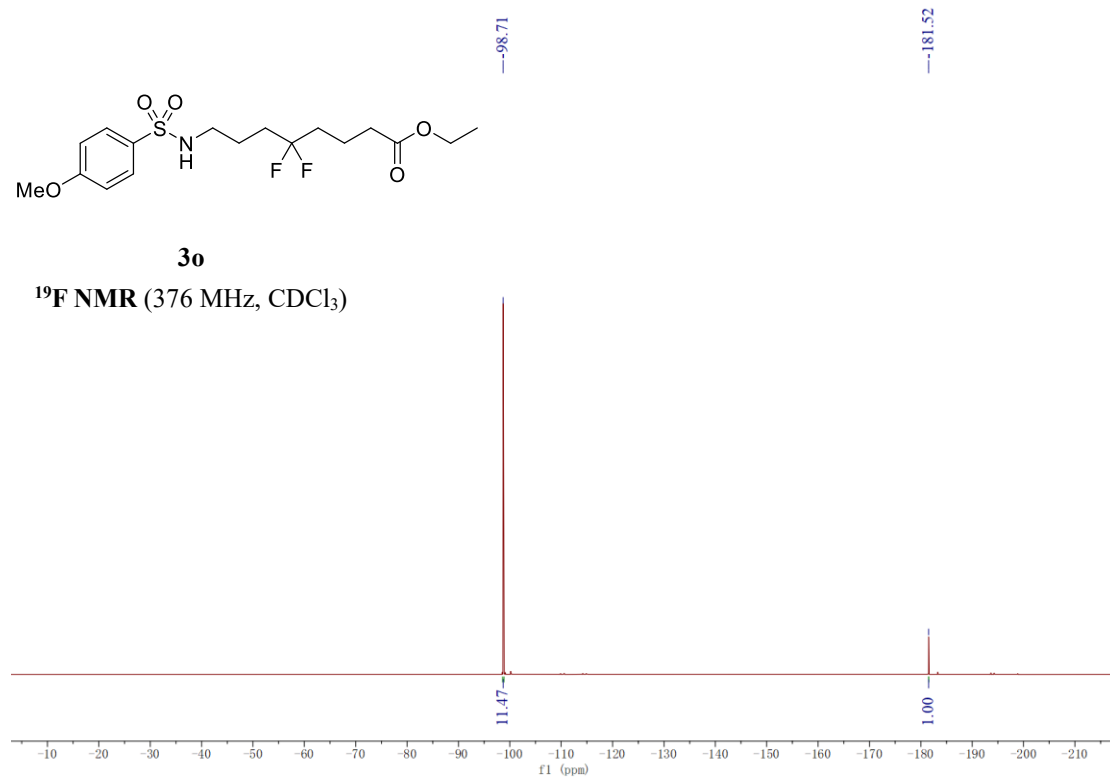

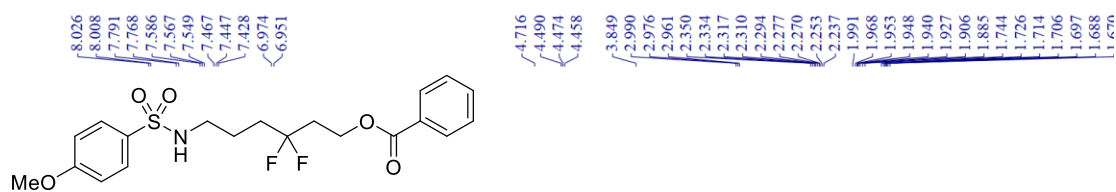

**3p**

$^1\text{H}$  NMR (400 MHz,  $\text{CDCl}_3$ )

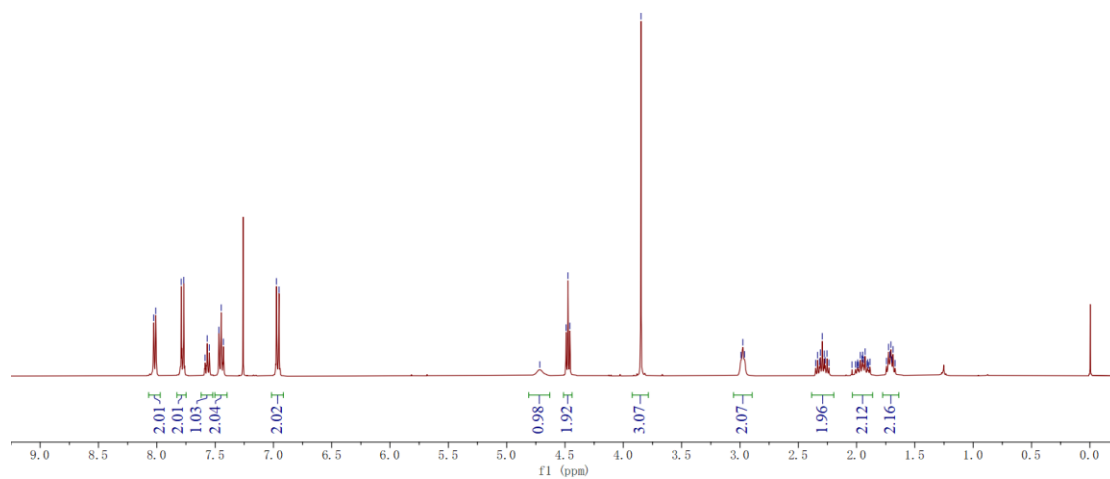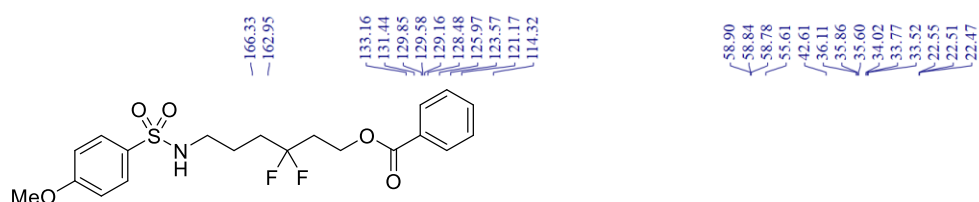

**3p**

$^{13}\text{C}$  NMR (101 MHz,  $\text{CDCl}_3$ )

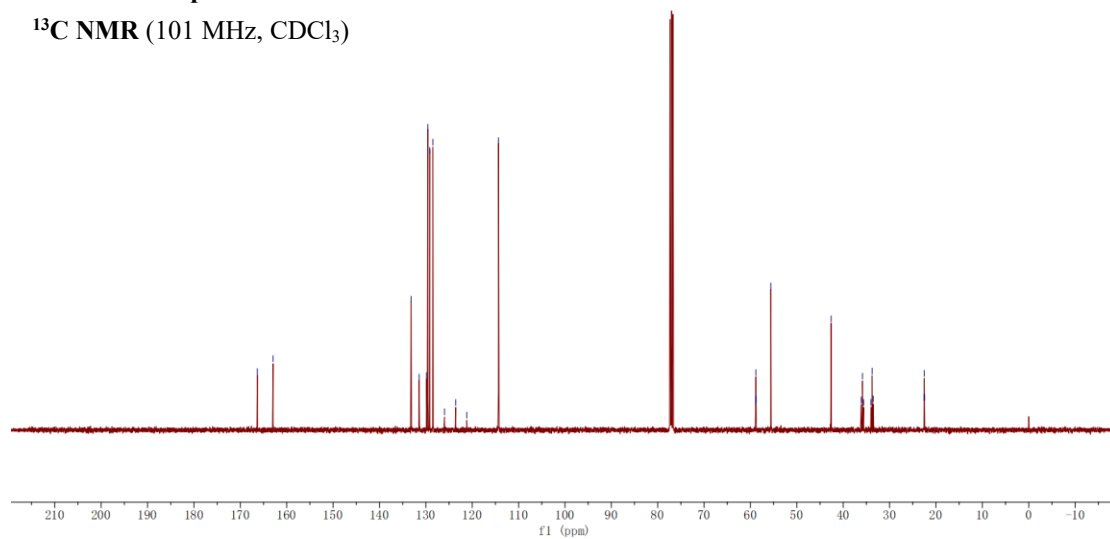

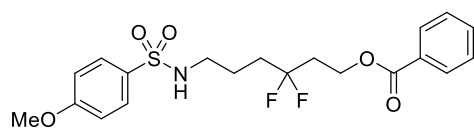

**3p**

**$^{19}\text{F}$  NMR (376 MHz,  $\text{CDCl}_3$ )**

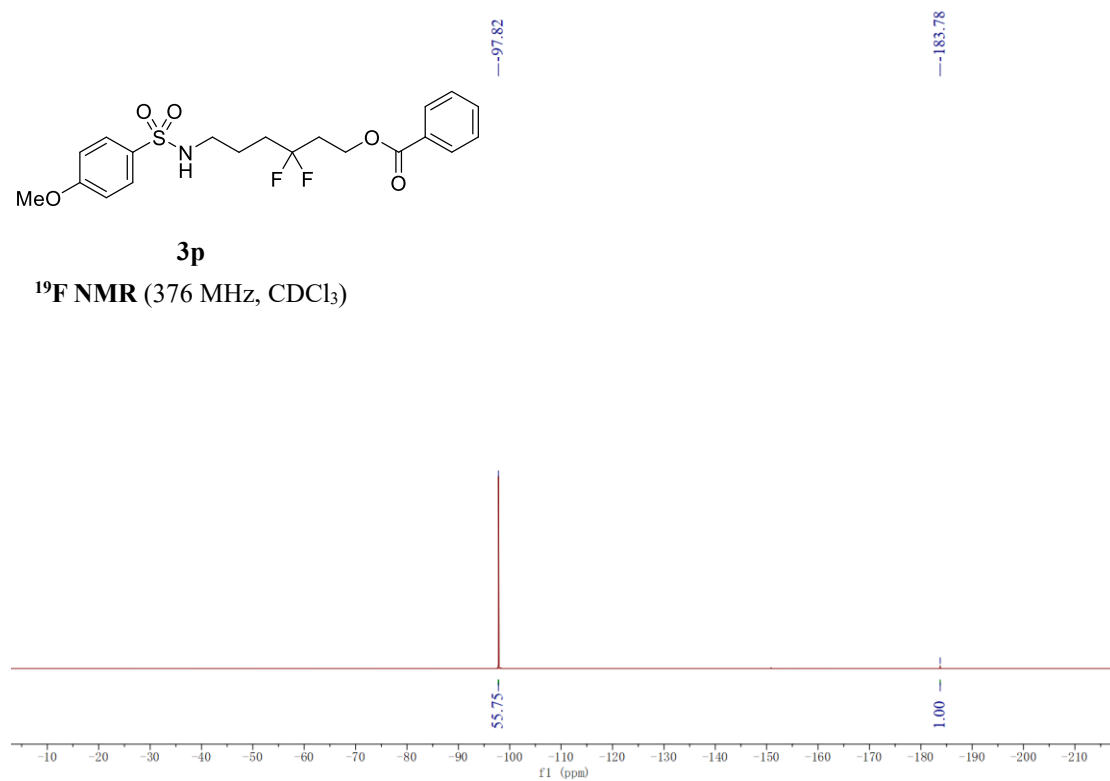



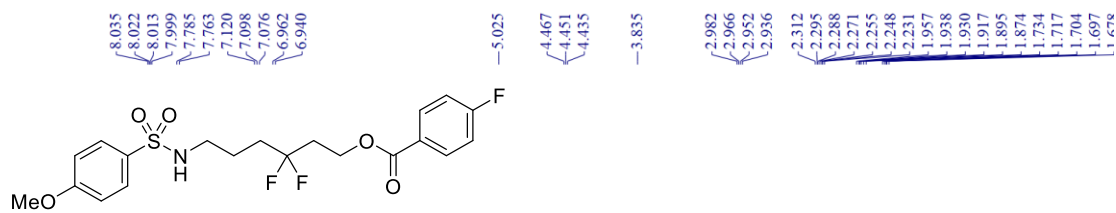

**3q**

$^1\text{H}$  NMR (400 MHz,  $\text{CDCl}_3$ )

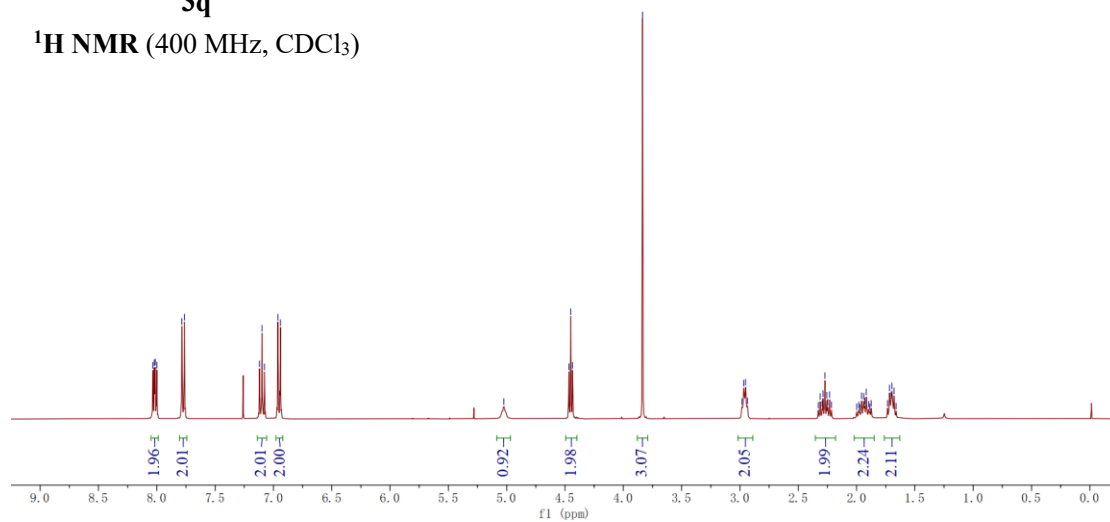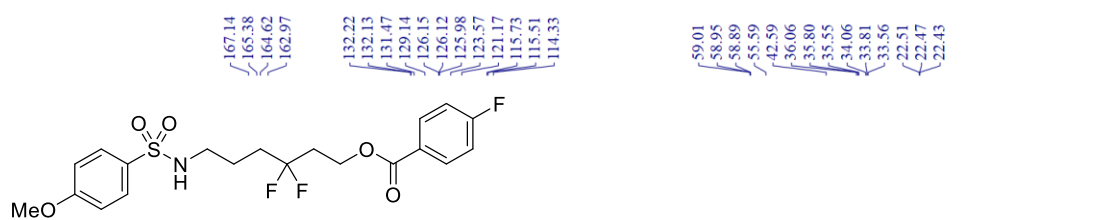

**3q**

$^{13}\text{C}$  NMR (101 MHz,  $\text{CDCl}_3$ )

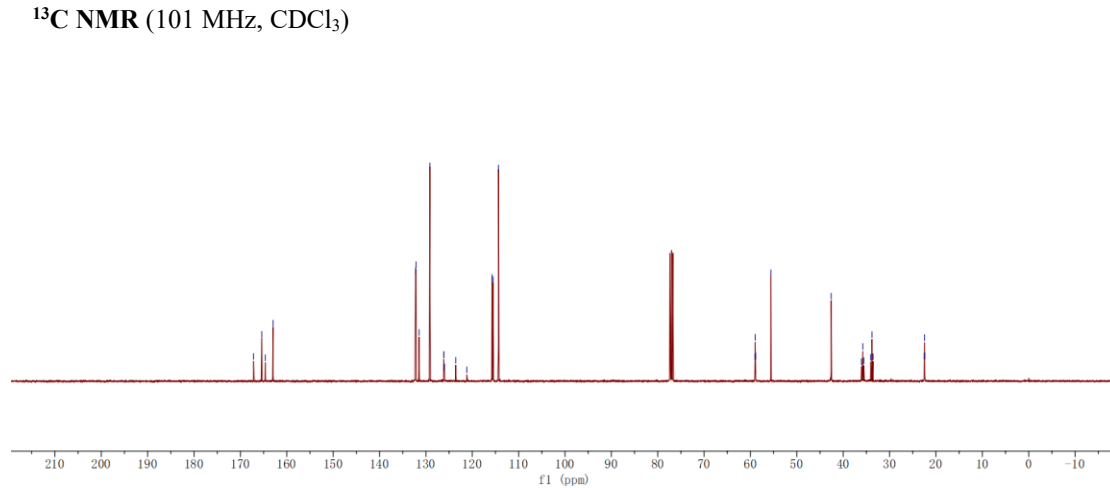

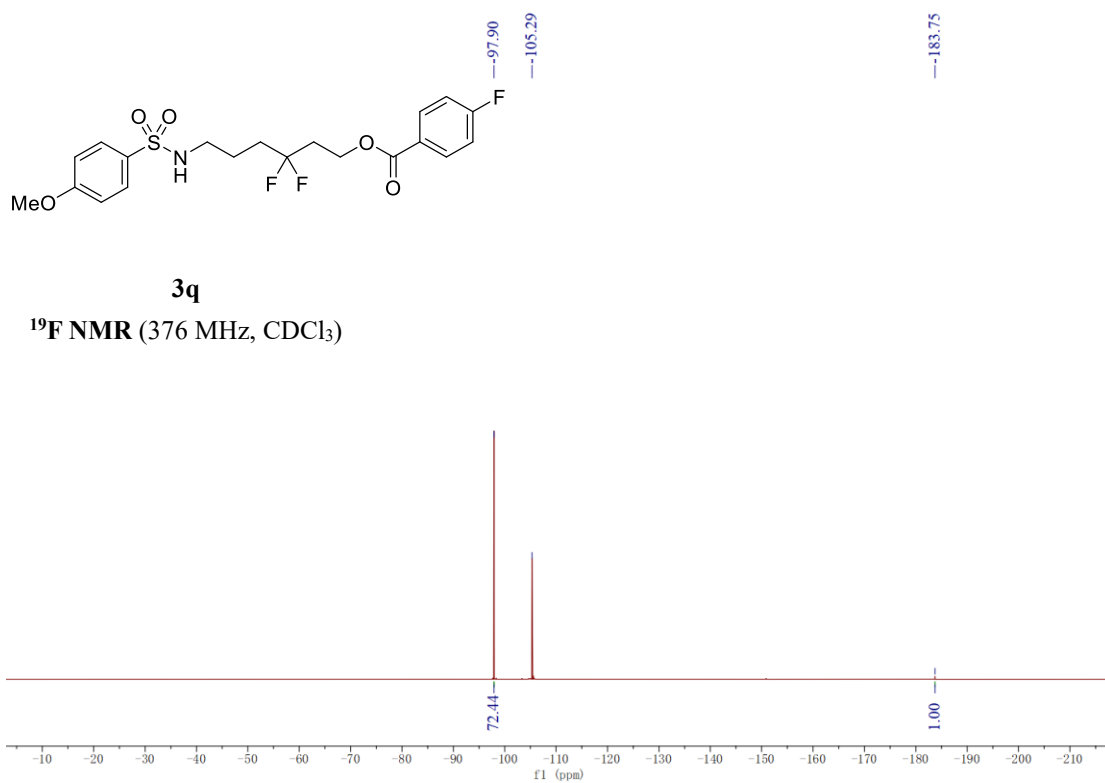

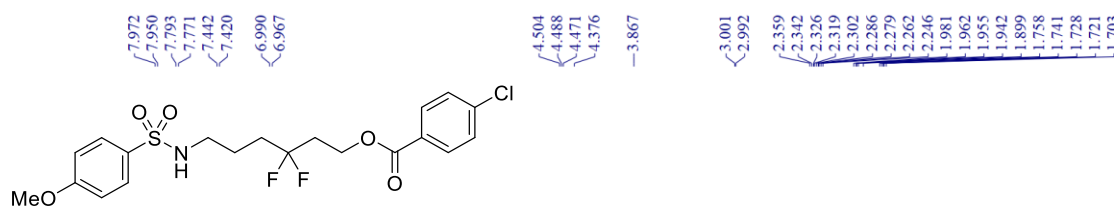

**3r**

$^1\text{H}$  NMR (400 MHz,  $\text{CDCl}_3$ )

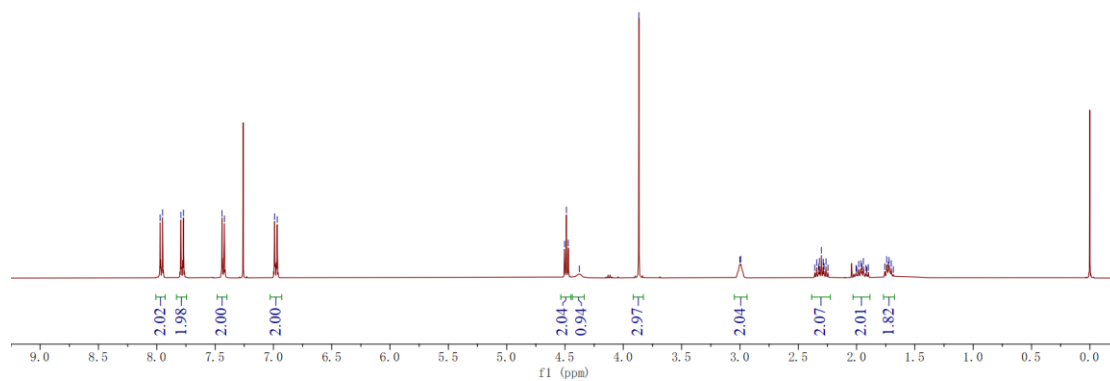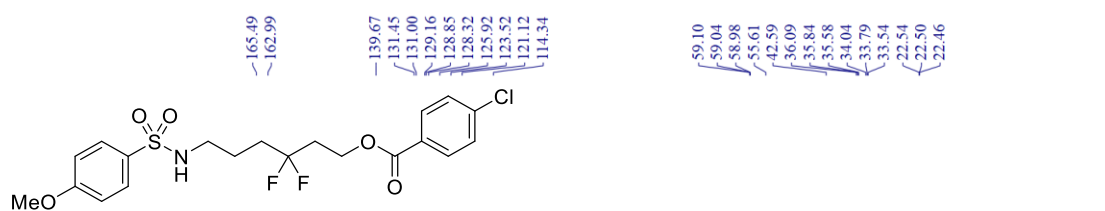

**3r**

$^{13}\text{C}$  NMR (101 MHz,  $\text{CDCl}_3$ )

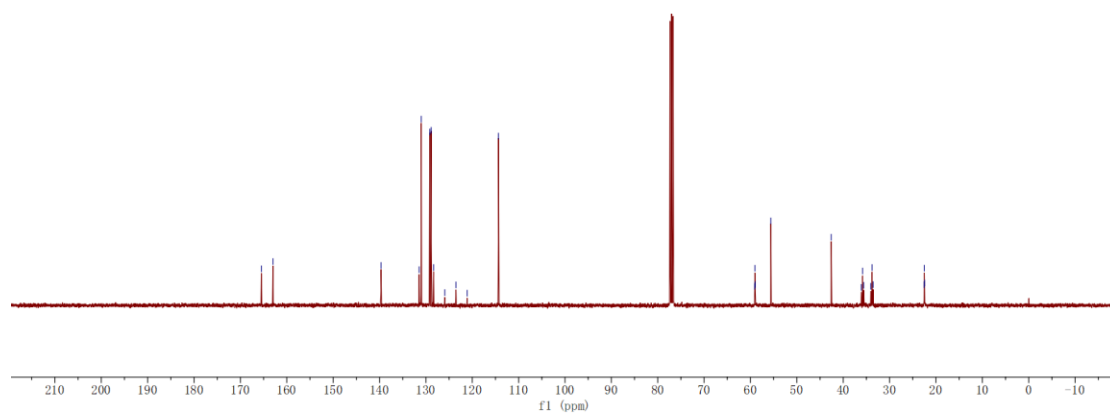

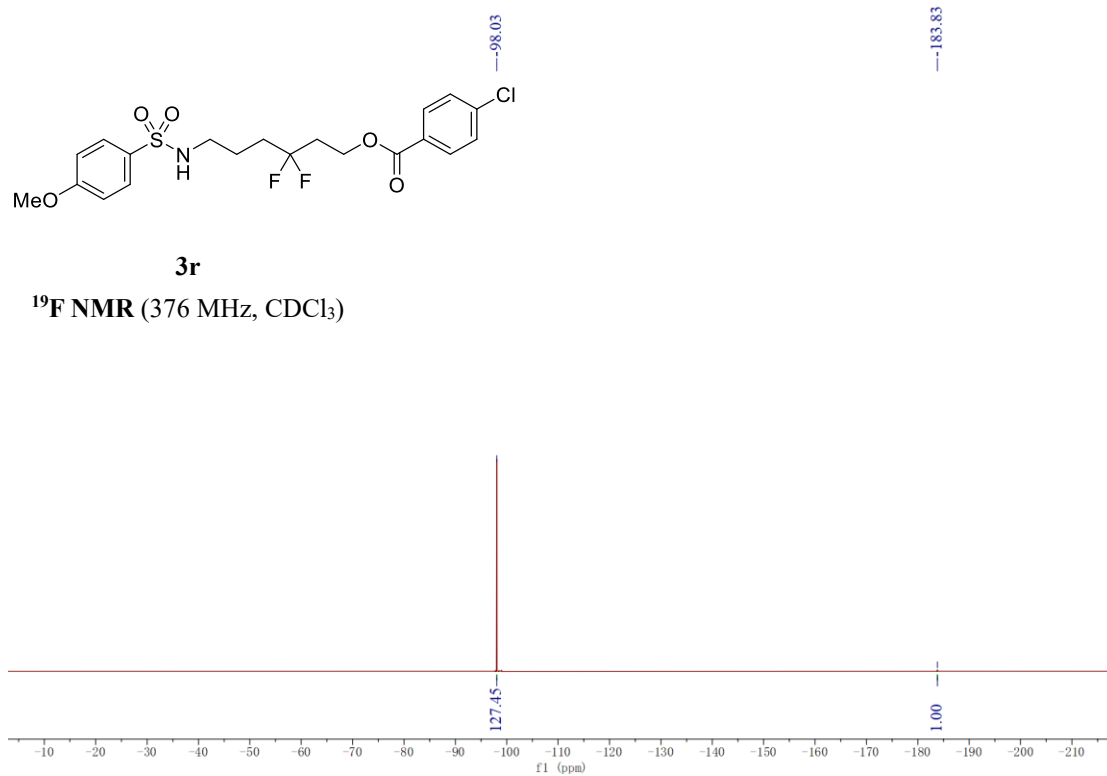

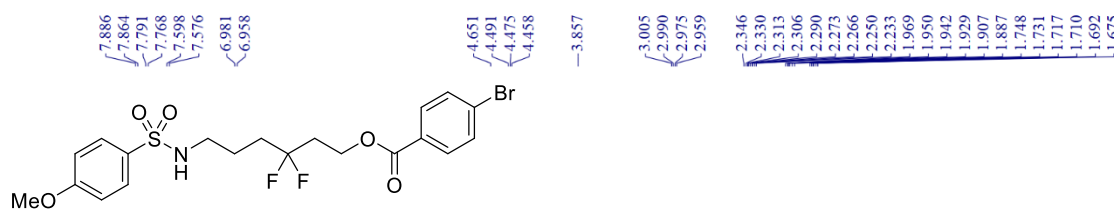

**3s**

$^1\text{H}$  NMR (400 MHz,  $\text{CDCl}_3$ )

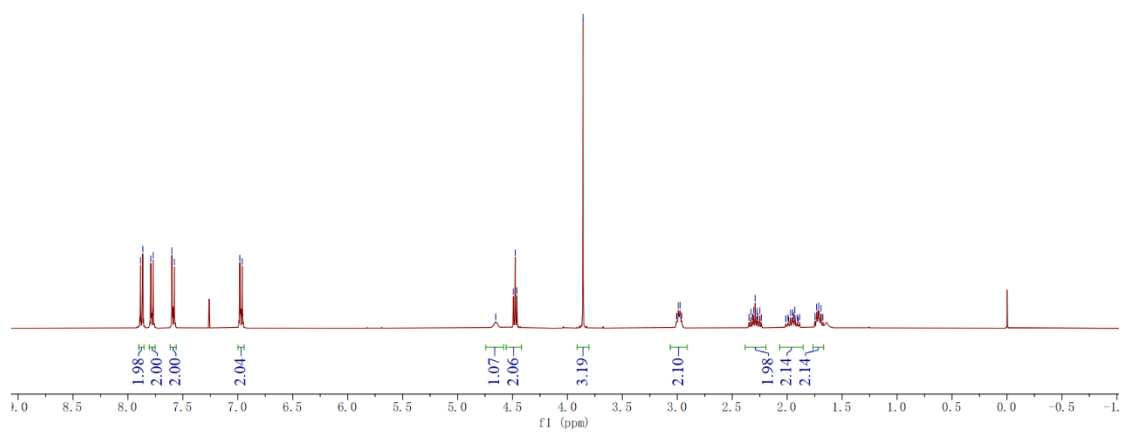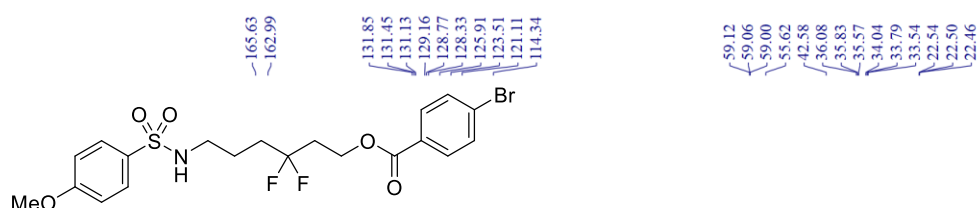

**3s**

$^{13}\text{C}$  NMR (101 MHz,  $\text{CDCl}_3$ )

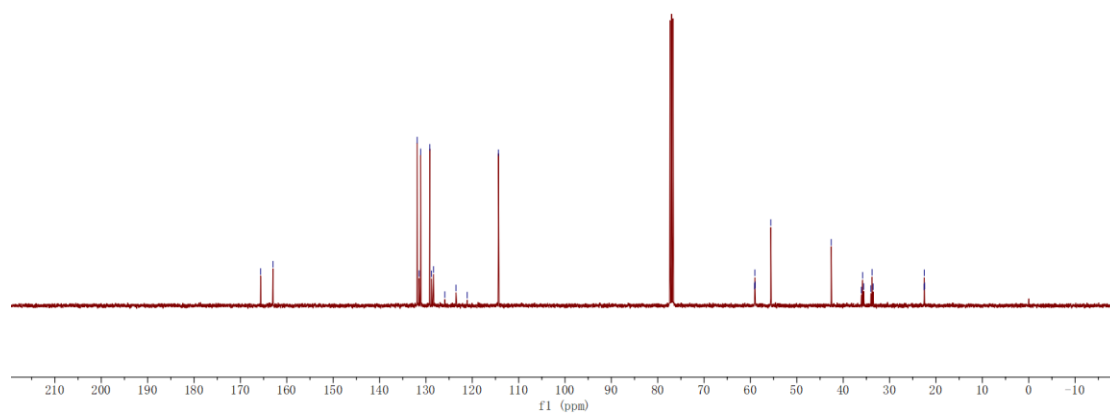

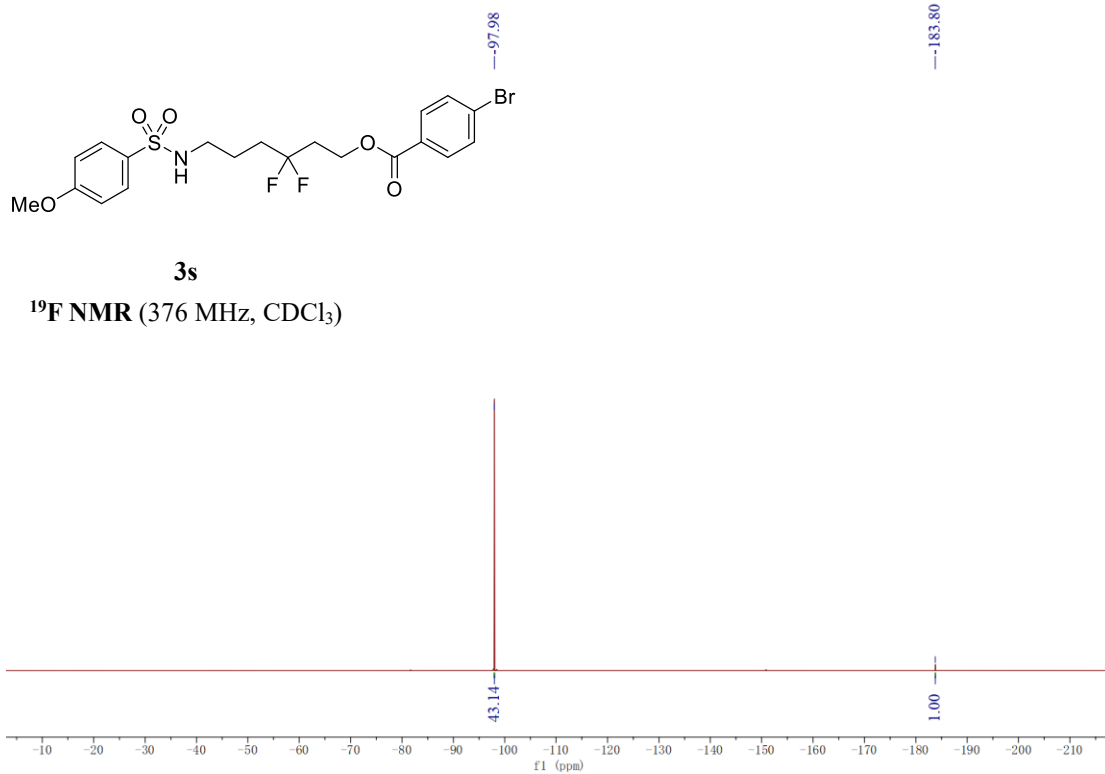

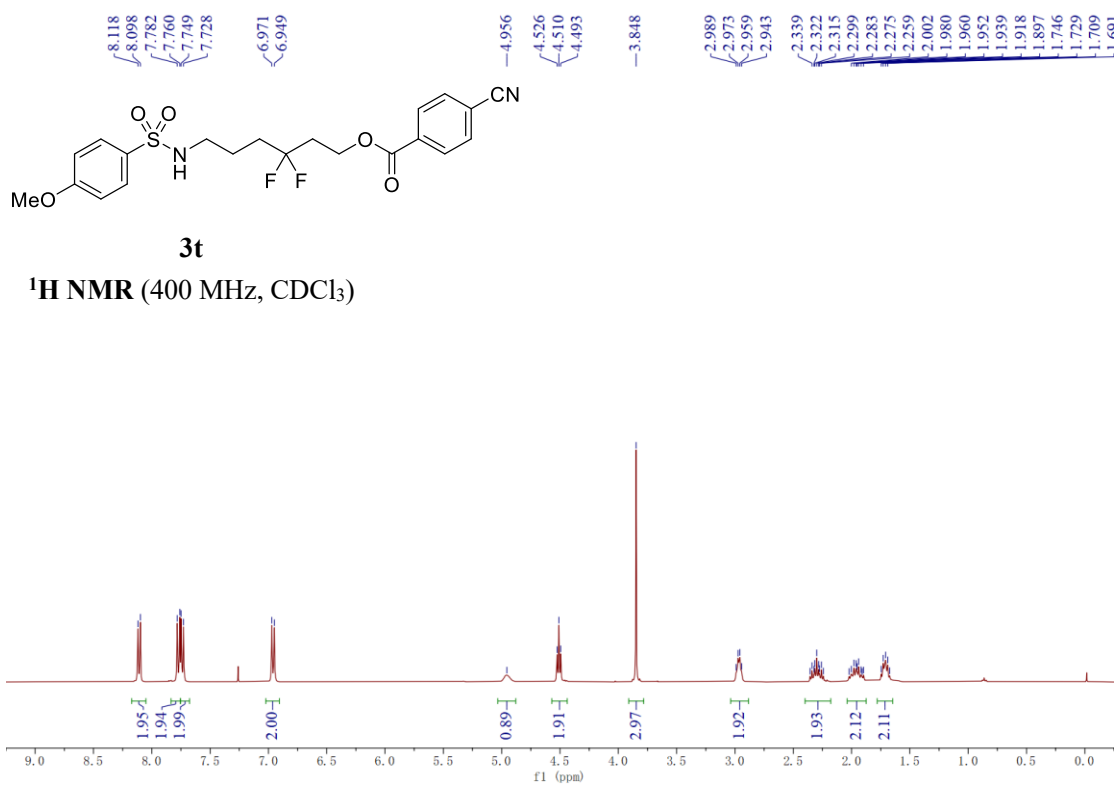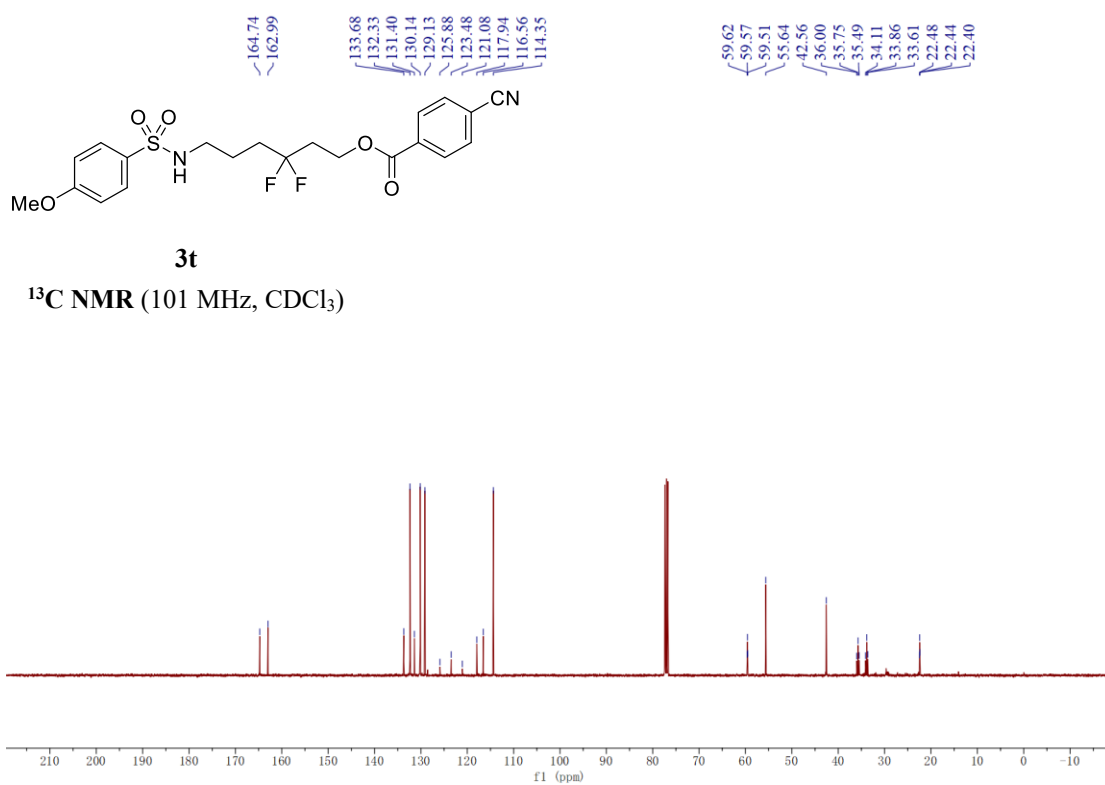

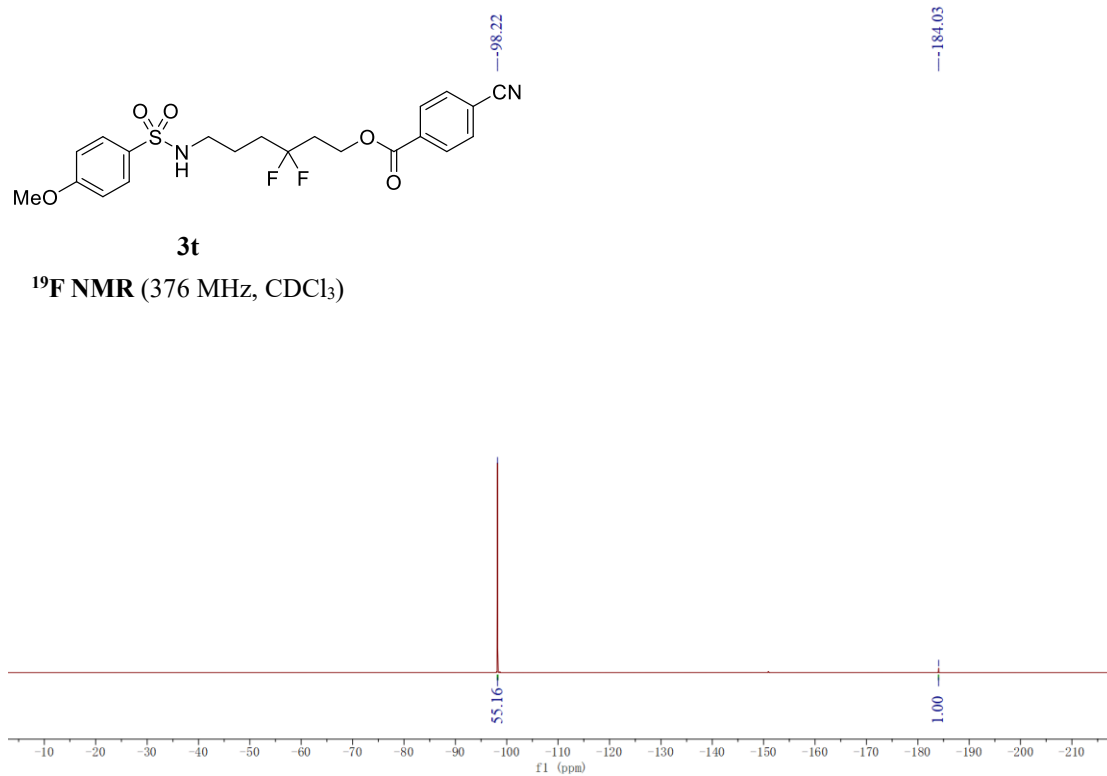



Z

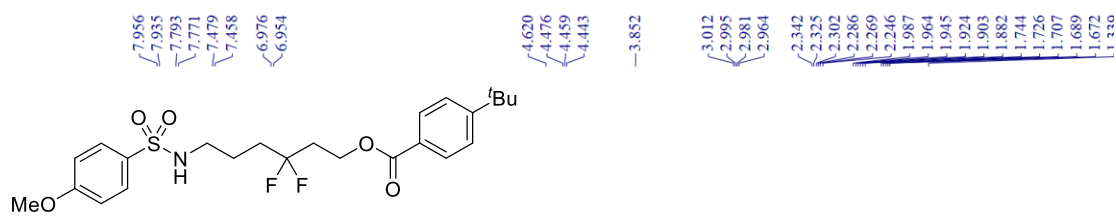

**3u**

$^1\text{H}$  NMR (400 MHz,  $\text{CDCl}_3$ )

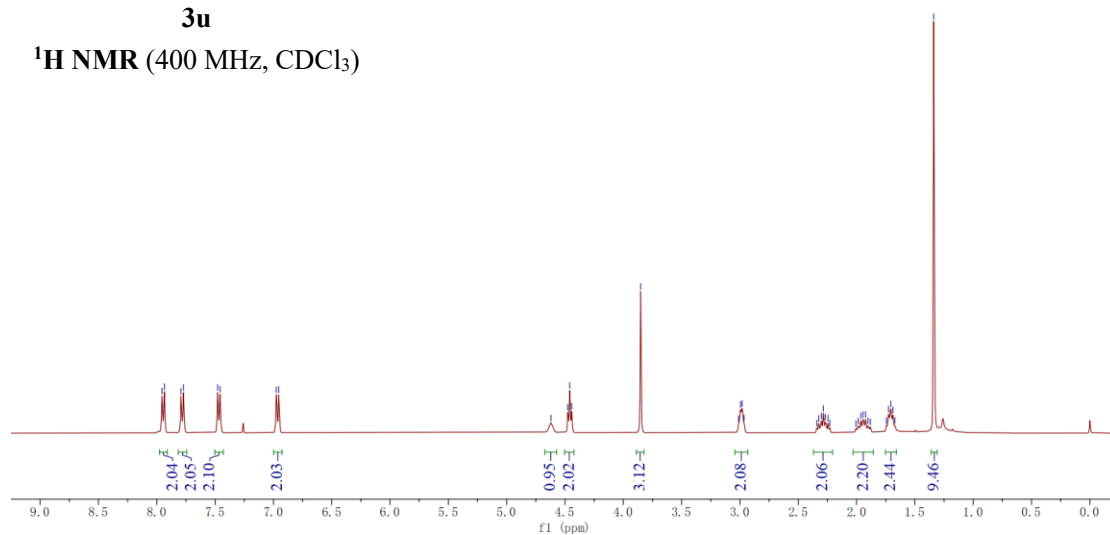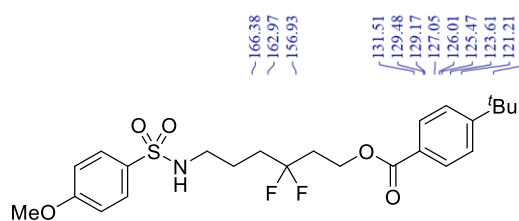

**3u**

$^{13}\text{C}$  NMR (101 MHz,  $\text{CDCl}_3$ )

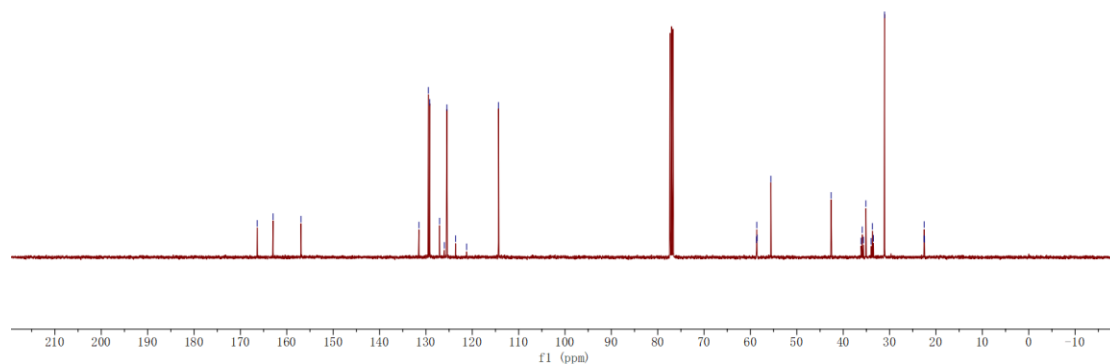

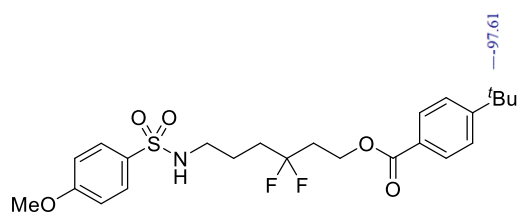

**3u**

$^{19}\text{F}$  NMR (376 MHz,  $\text{CDCl}_3$ )

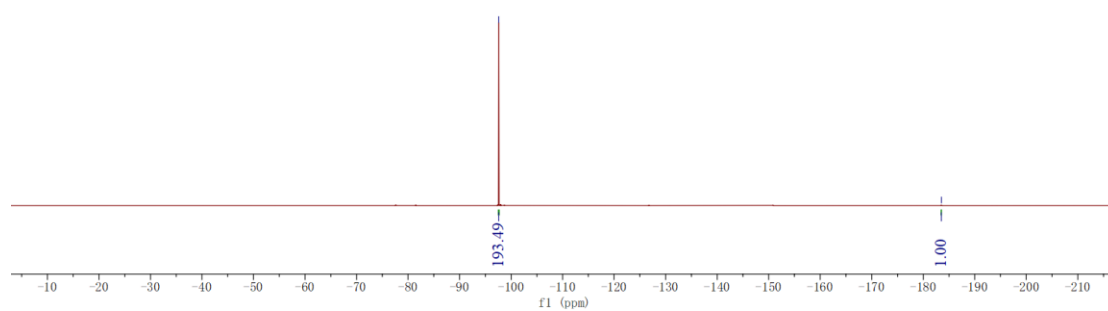

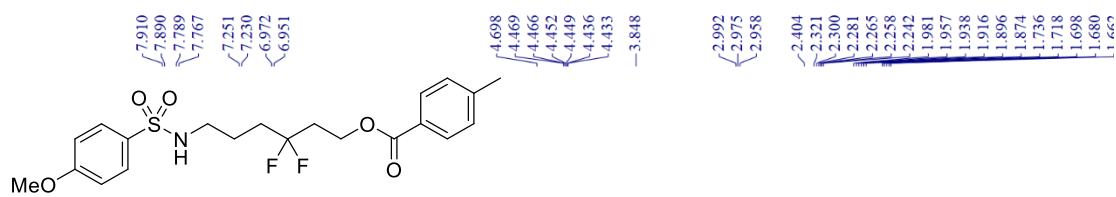

**3v**

$^1\text{H}$  NMR (400 MHz,  $\text{CDCl}_3$ )

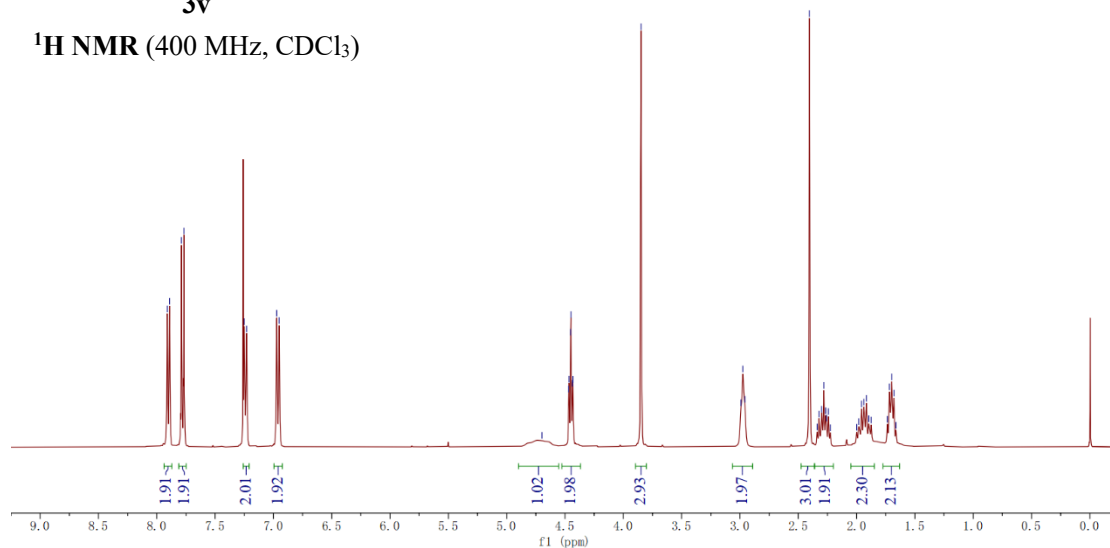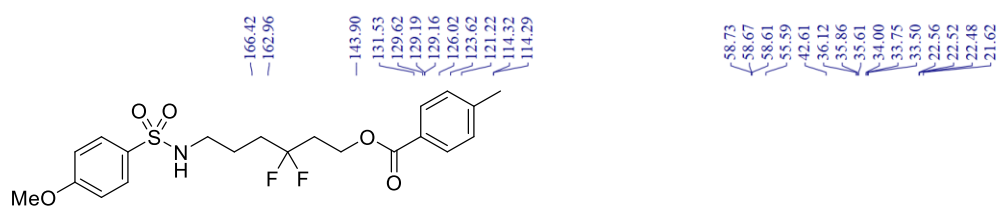

**3v**

$^{13}\text{C}$  NMR (101 MHz,  $\text{CDCl}_3$ )

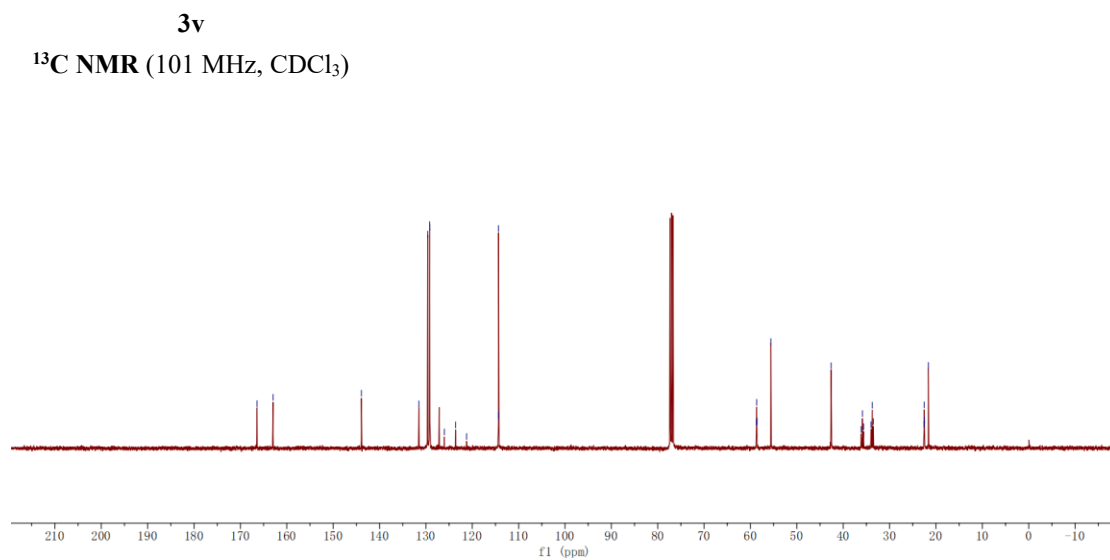

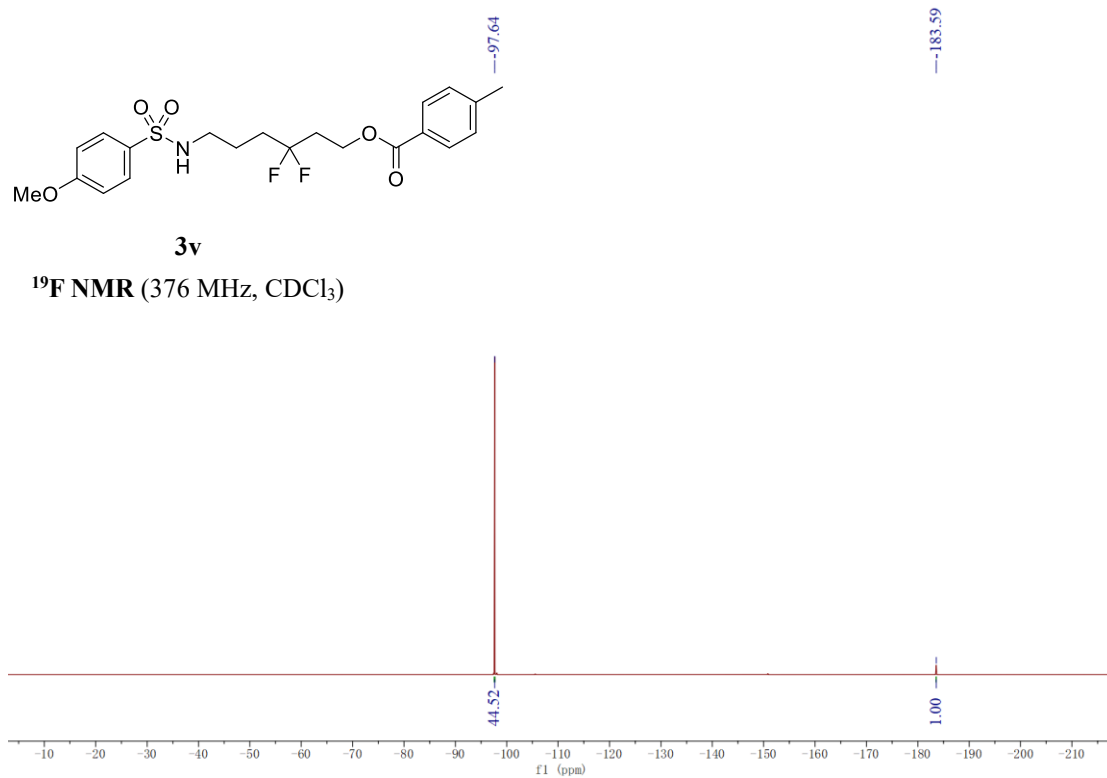

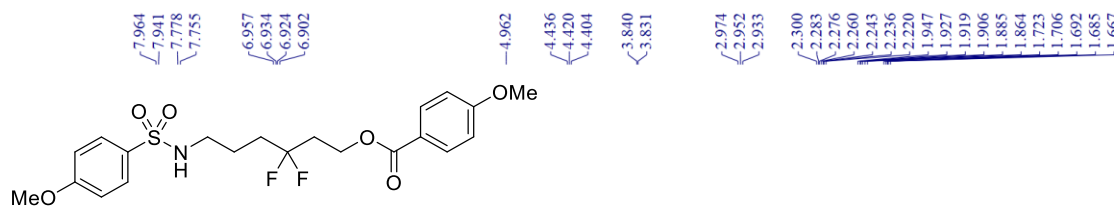

**3w**

$^1\text{H}$  NMR (400 MHz,  $\text{CDCl}_3$ )

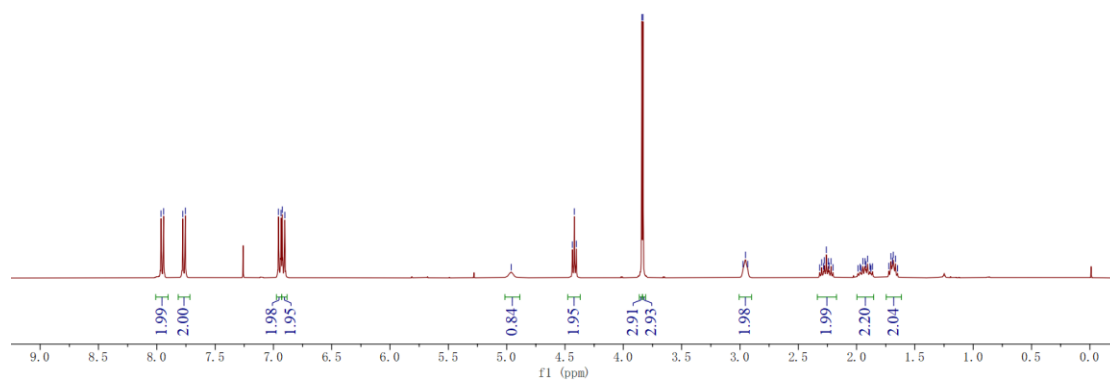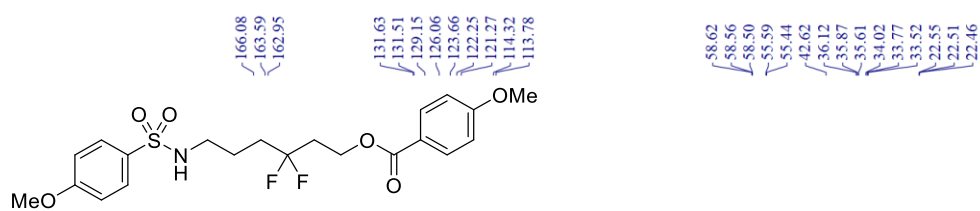

**3w**

$^{13}\text{C}$  NMR (101 MHz,  $\text{CDCl}_3$ )

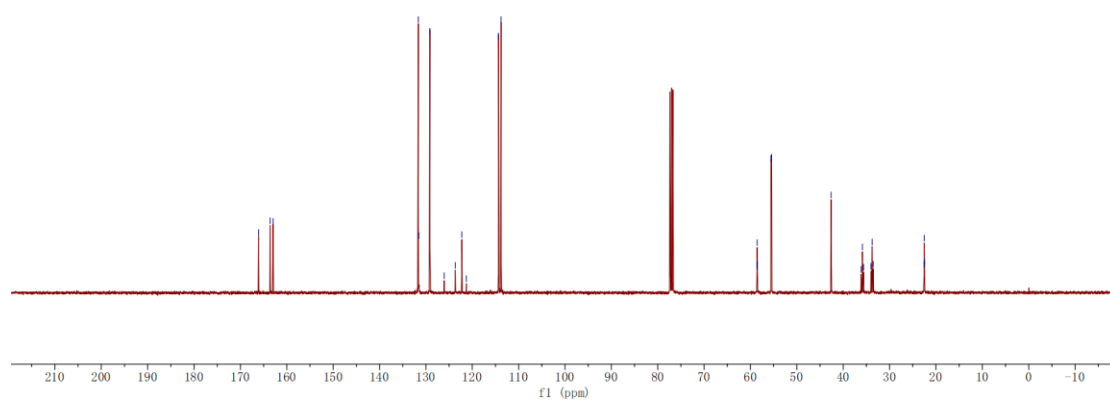

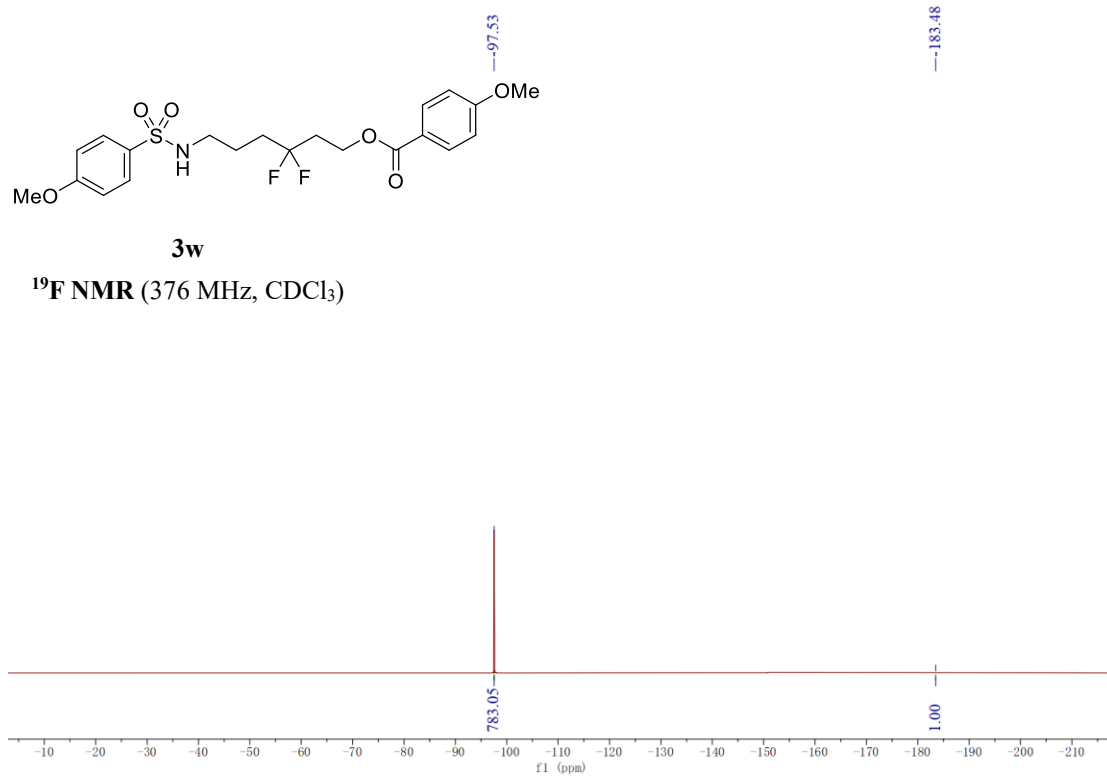

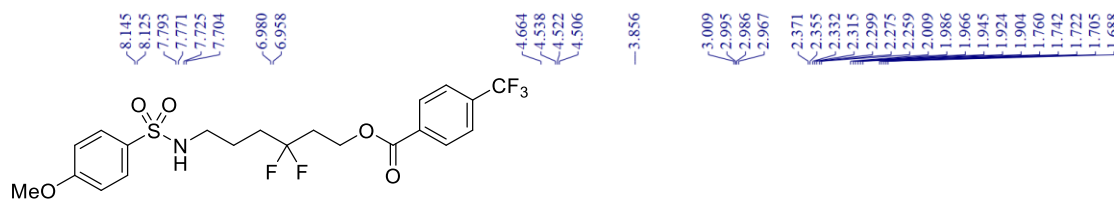

**3x**

$^1\text{H}$  NMR (400 MHz,  $\text{CDCl}_3$ )

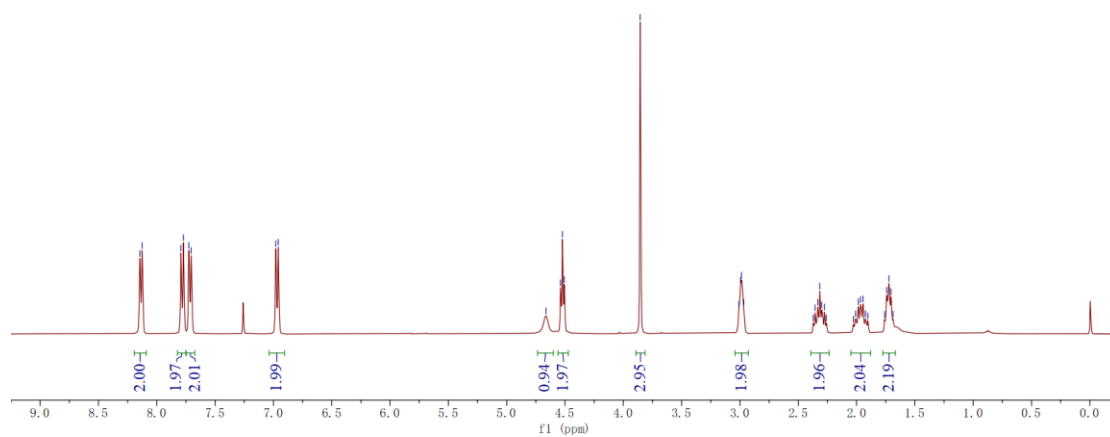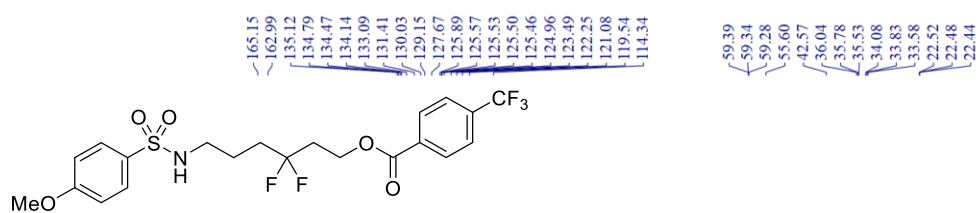

**3x**

$^{13}\text{C}$  NMR (101 MHz,  $\text{CDCl}_3$ )

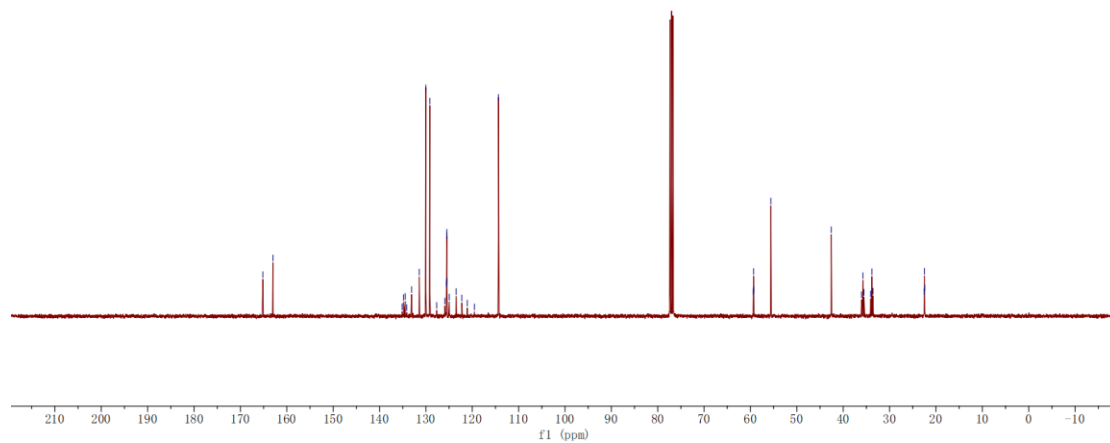

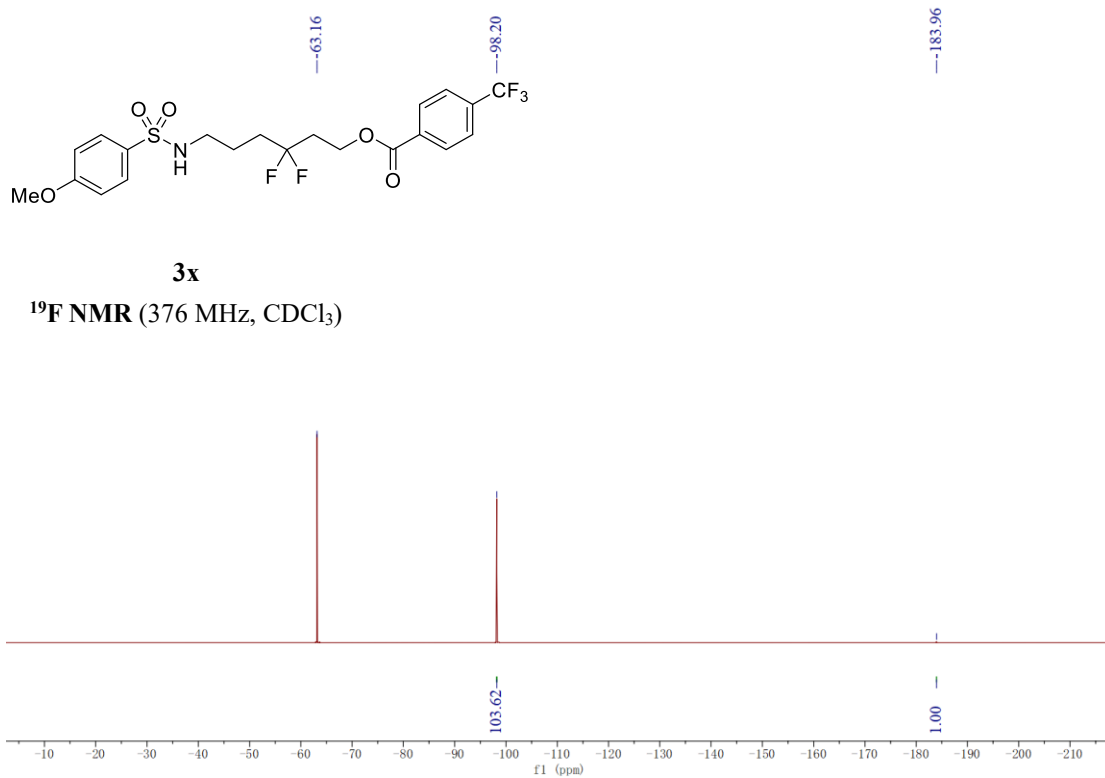



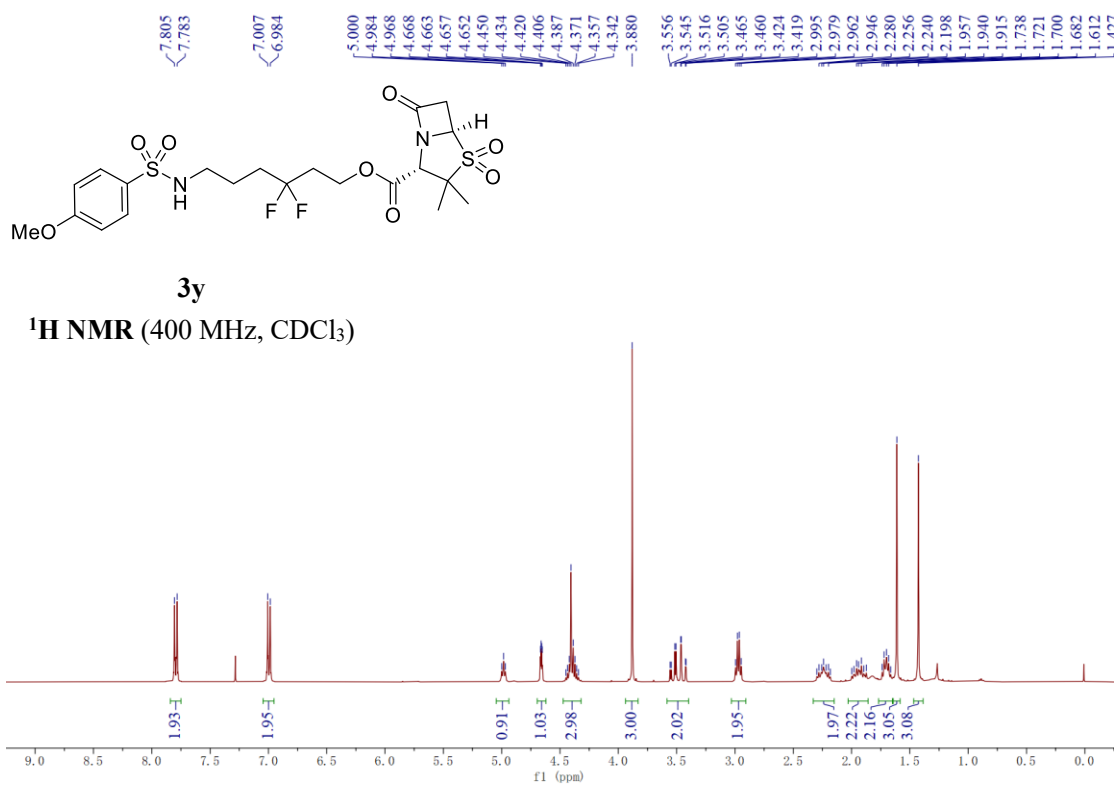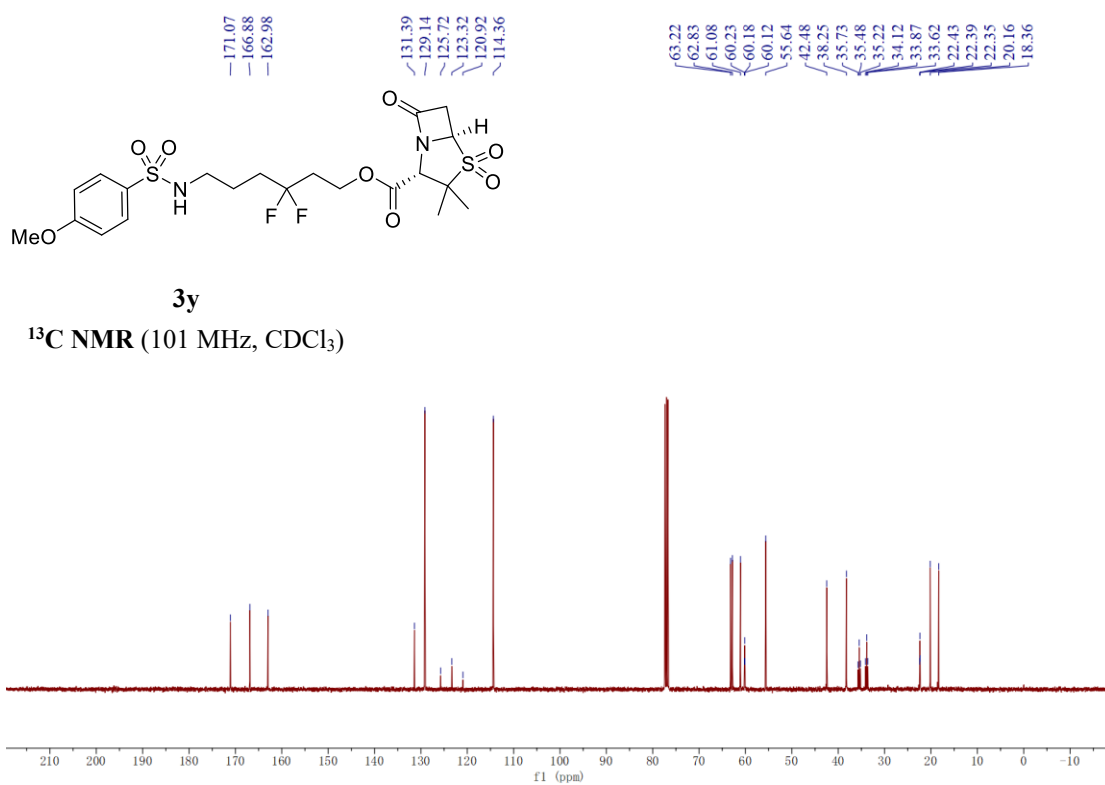

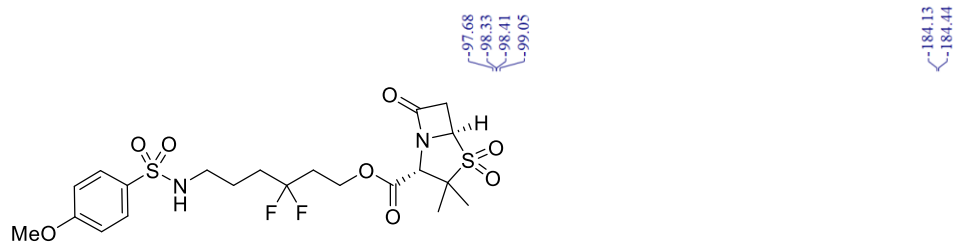

**3y**

$^{19}\text{F}$  NMR (376 MHz,  $\text{CDCl}_3$ )

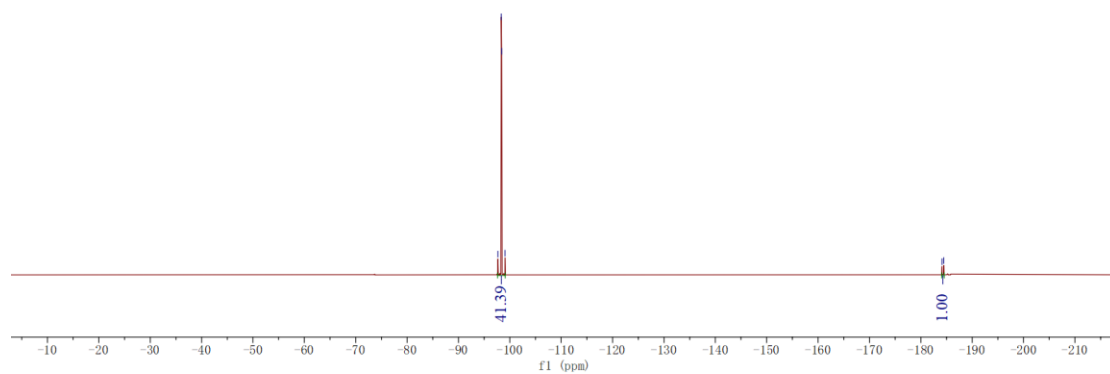

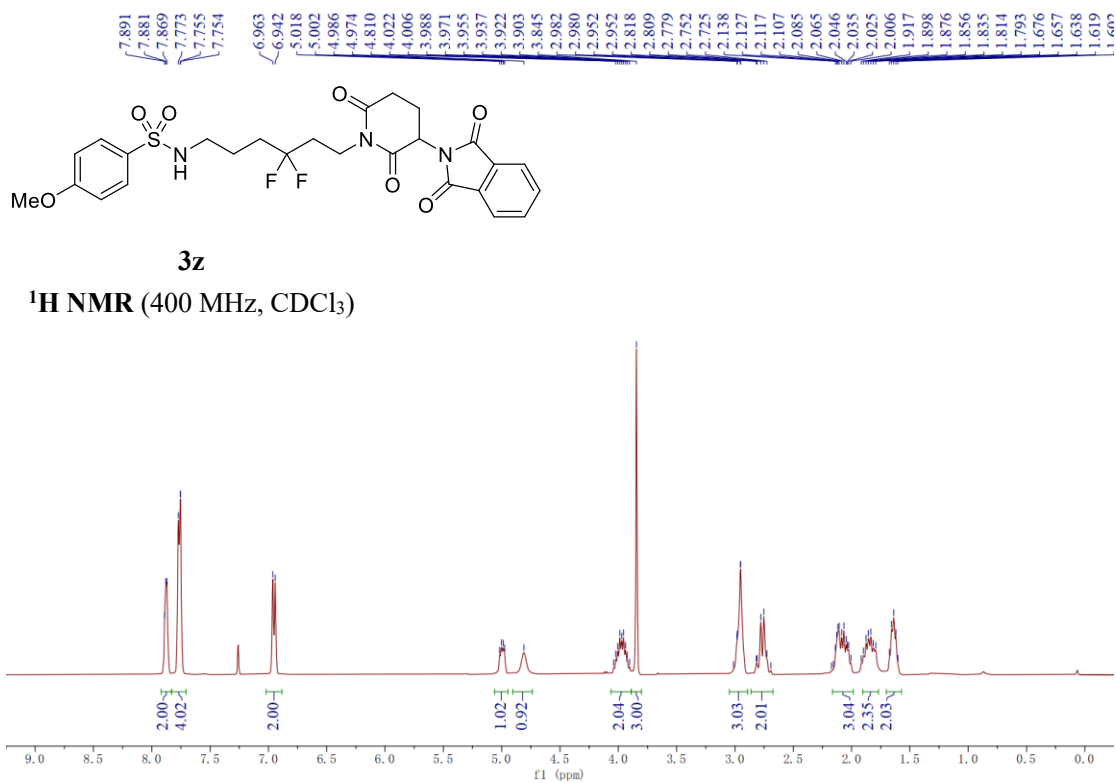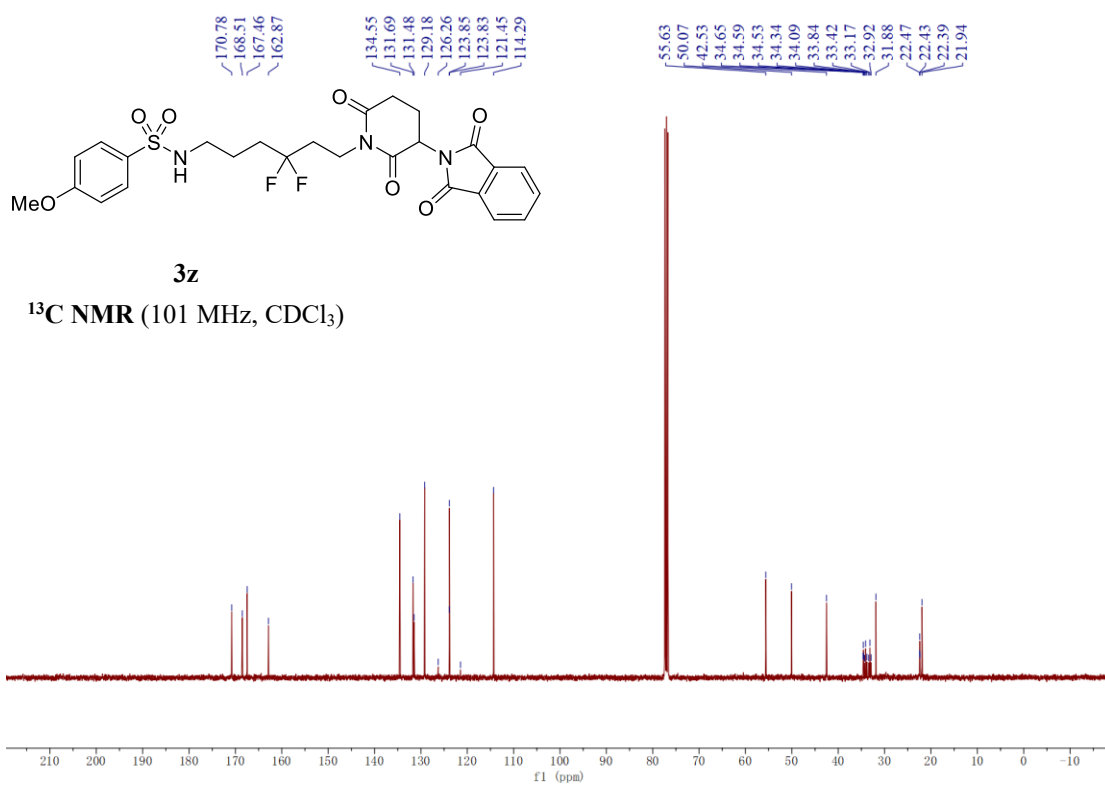

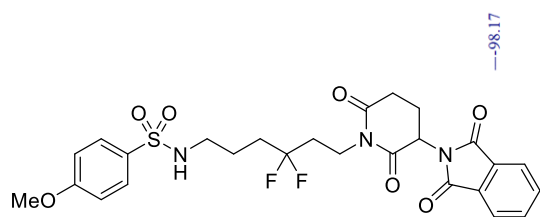

**3z**

**$^{19}\text{F}$  NMR (376 MHz,  $\text{CDCl}_3$ )**

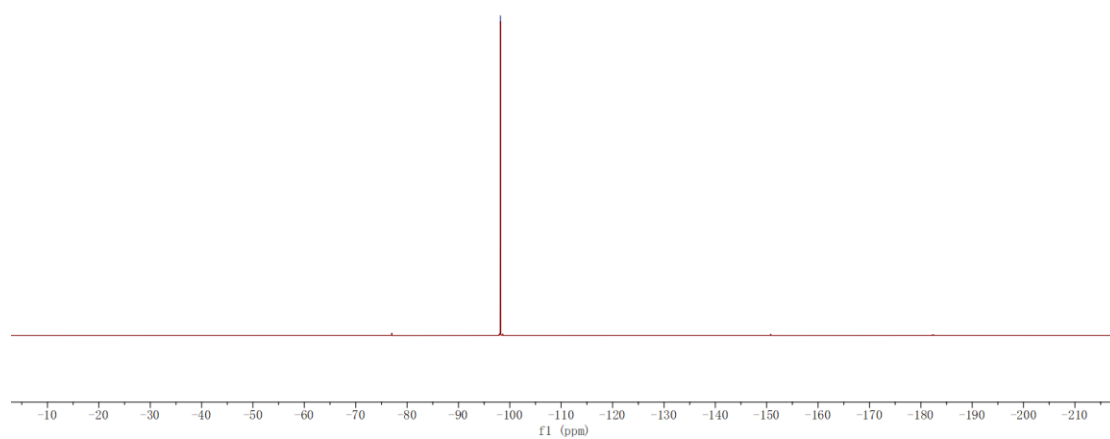

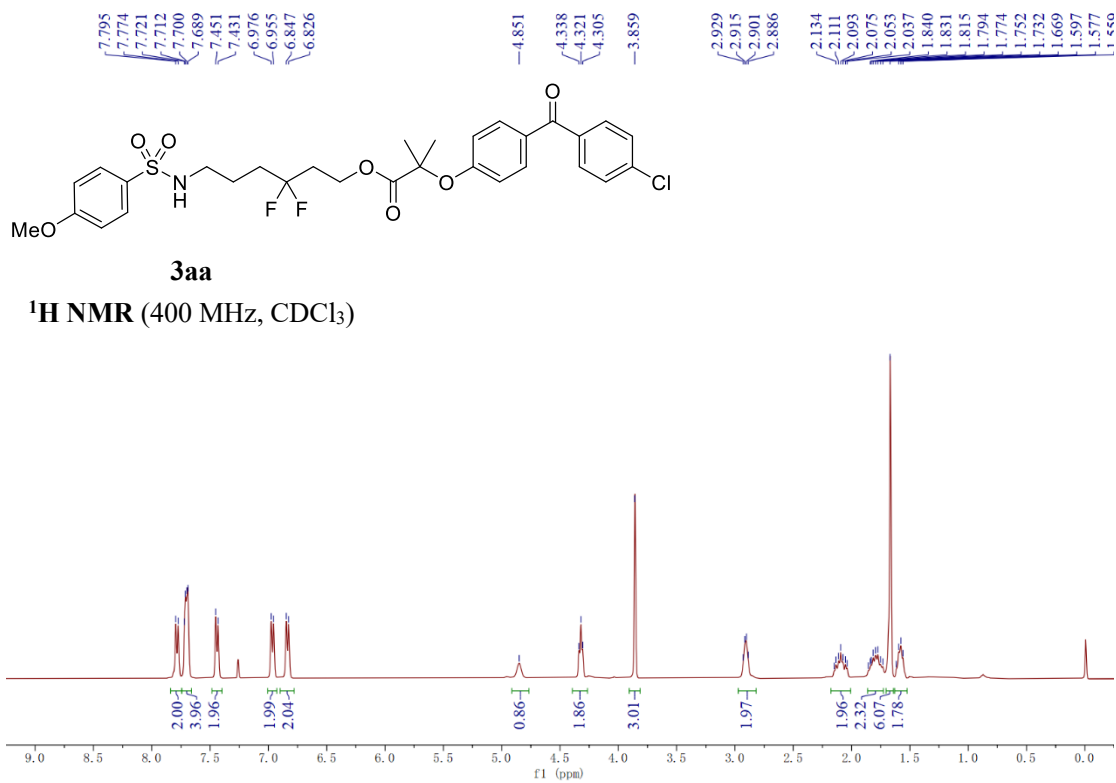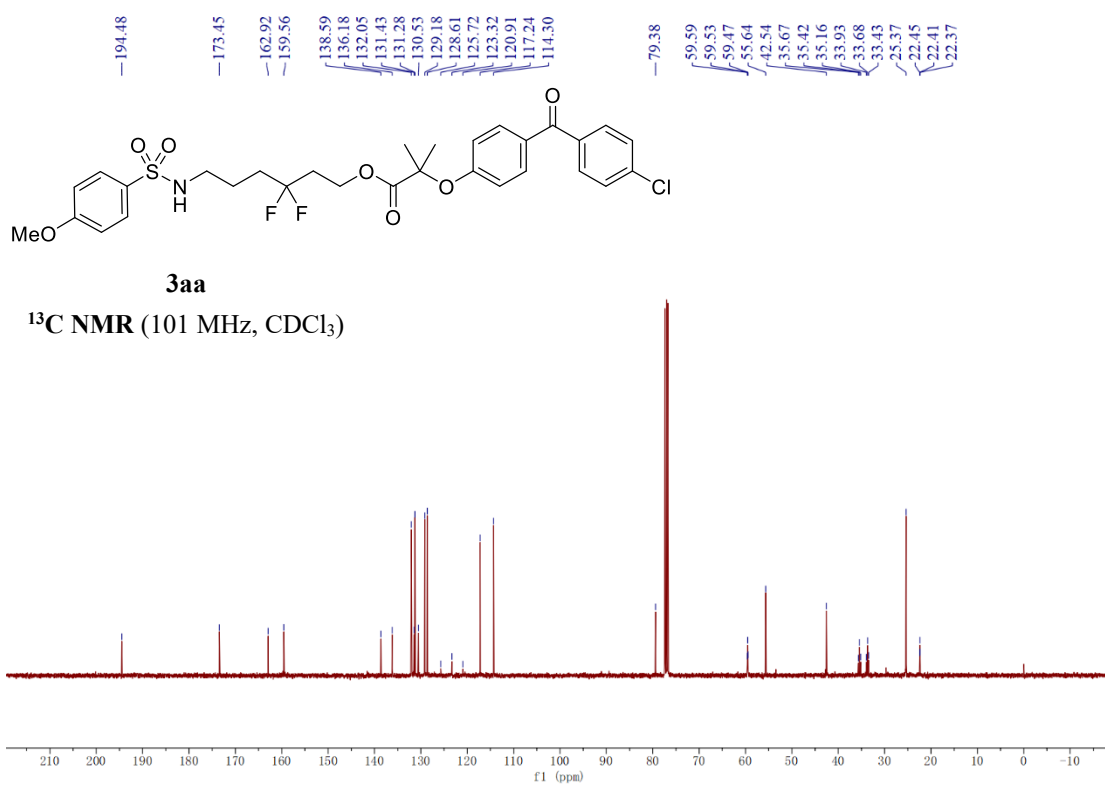

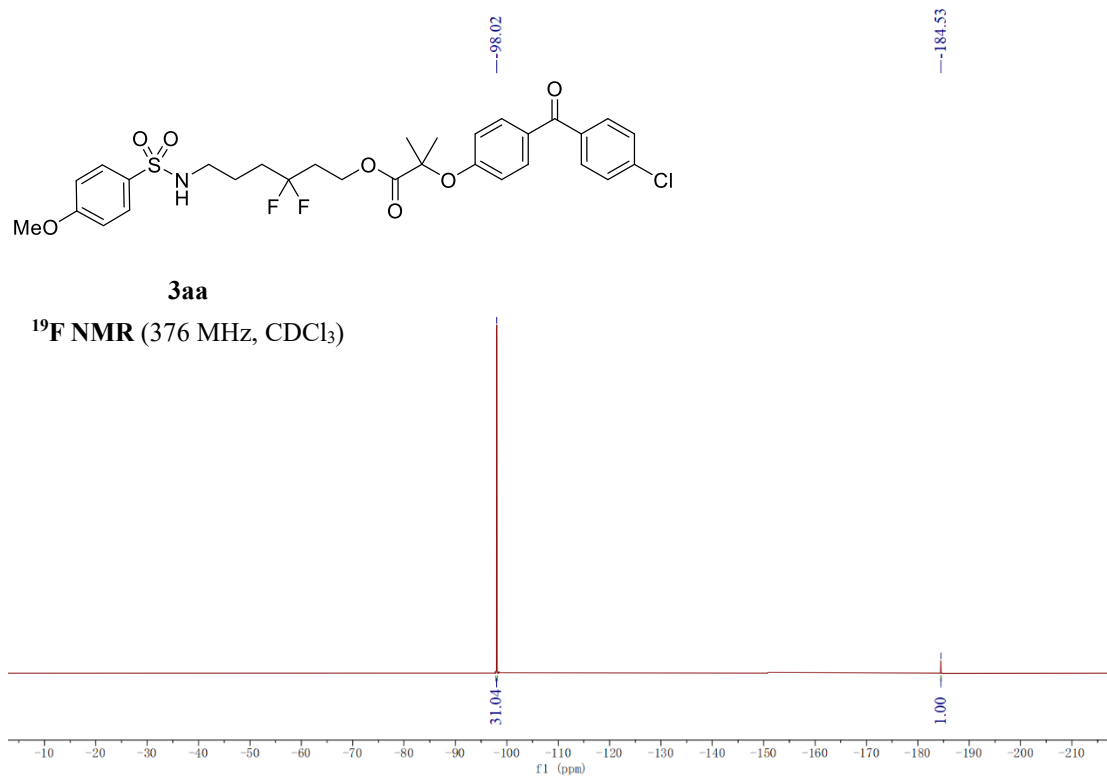

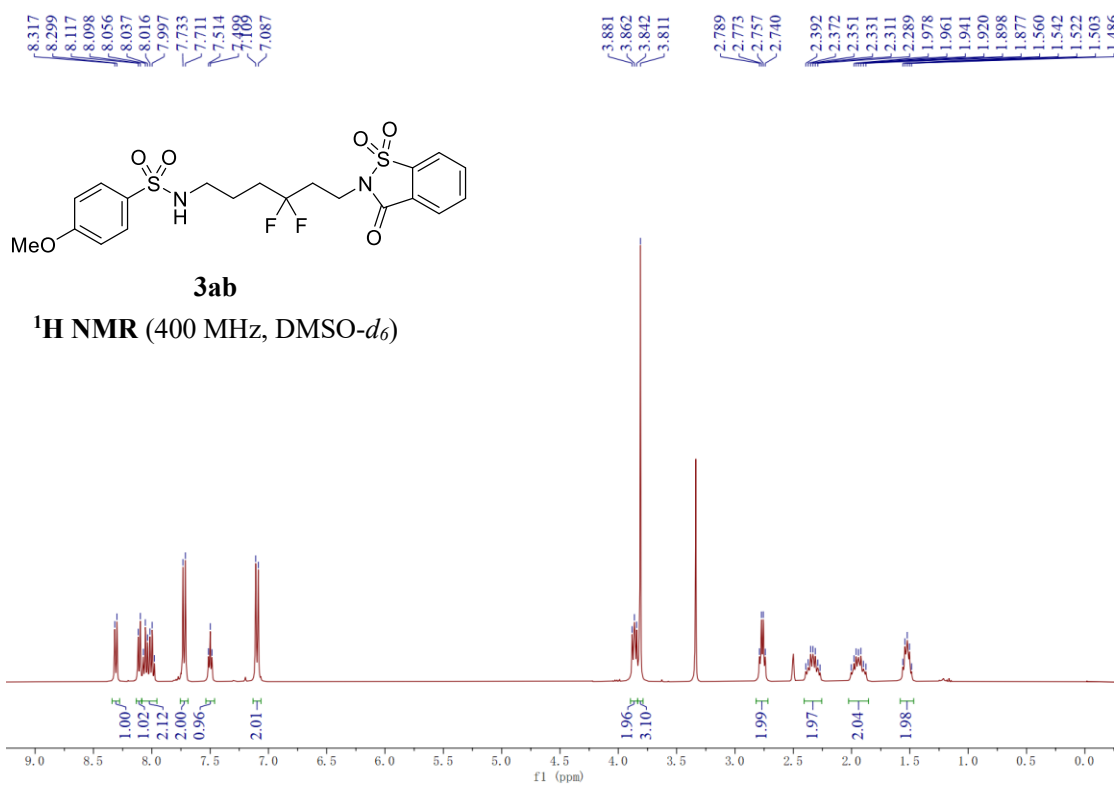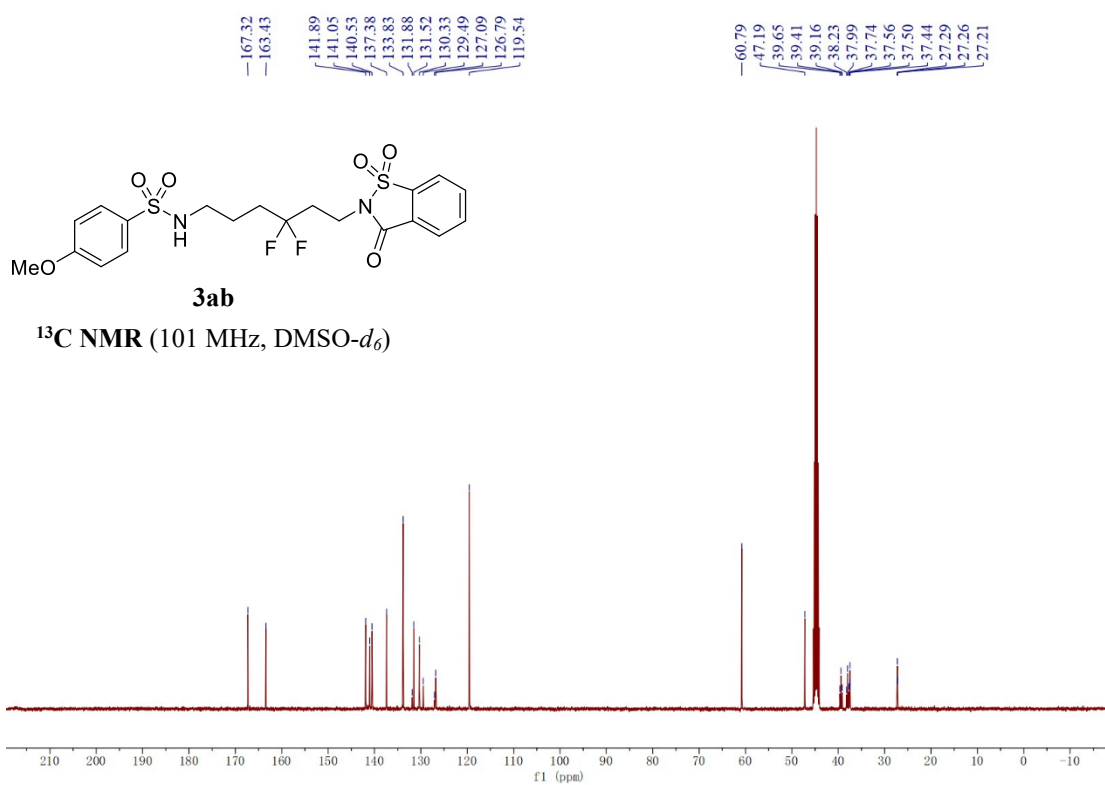

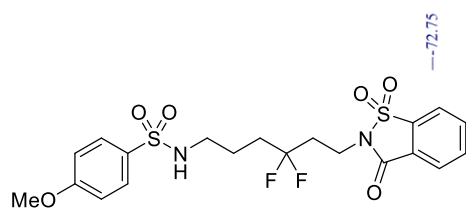

**3ab**

**$^{19}\text{F}$  NMR (376 MHz,  $\text{DMSO}-d_6$ )**

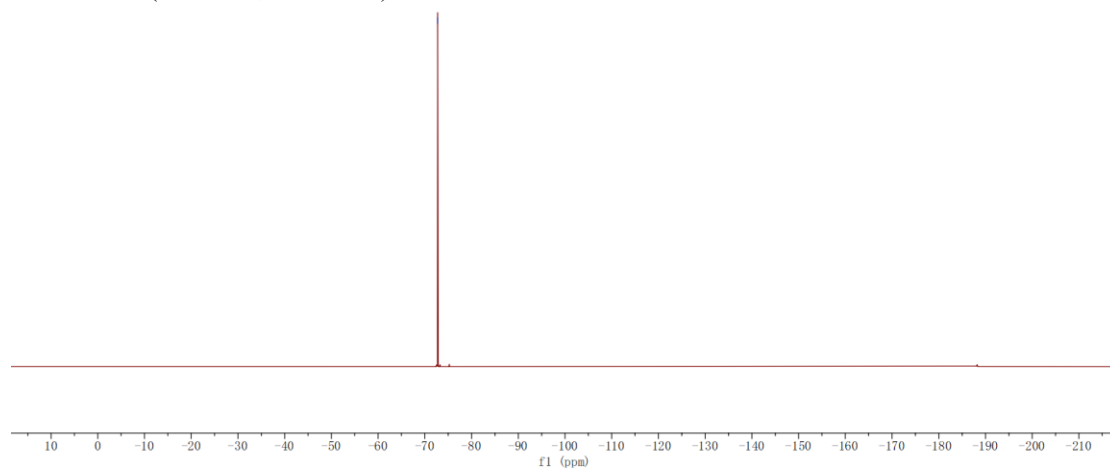



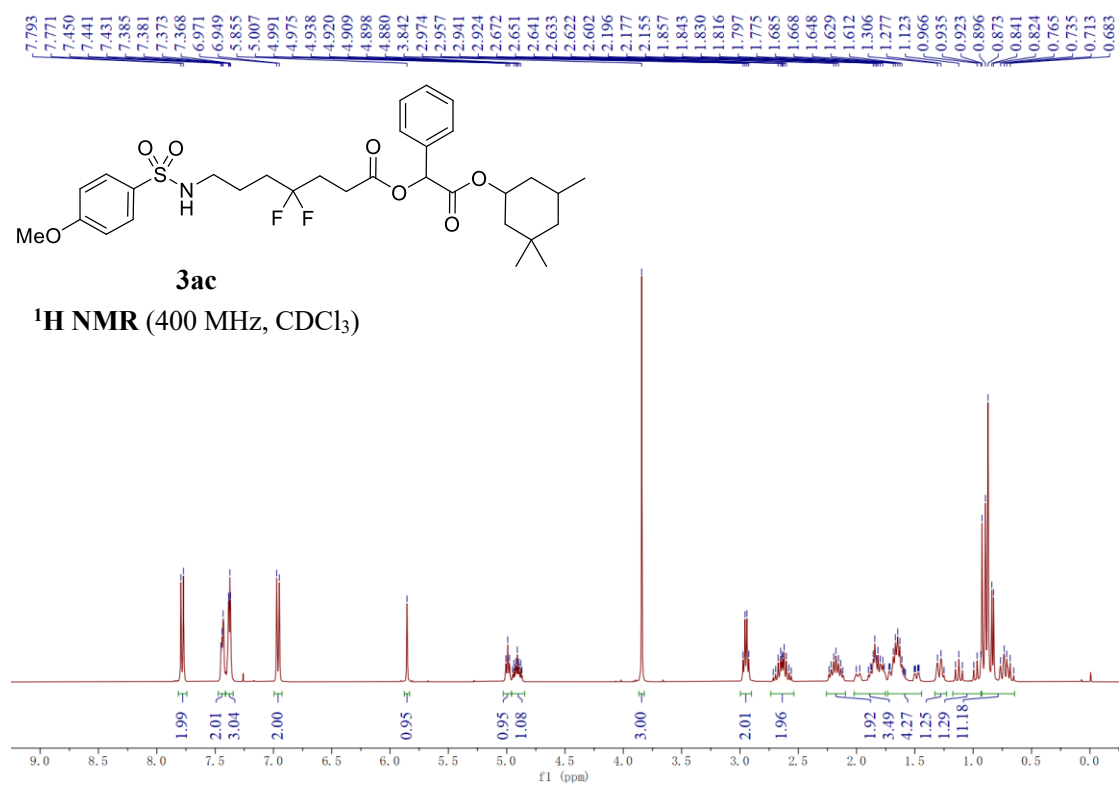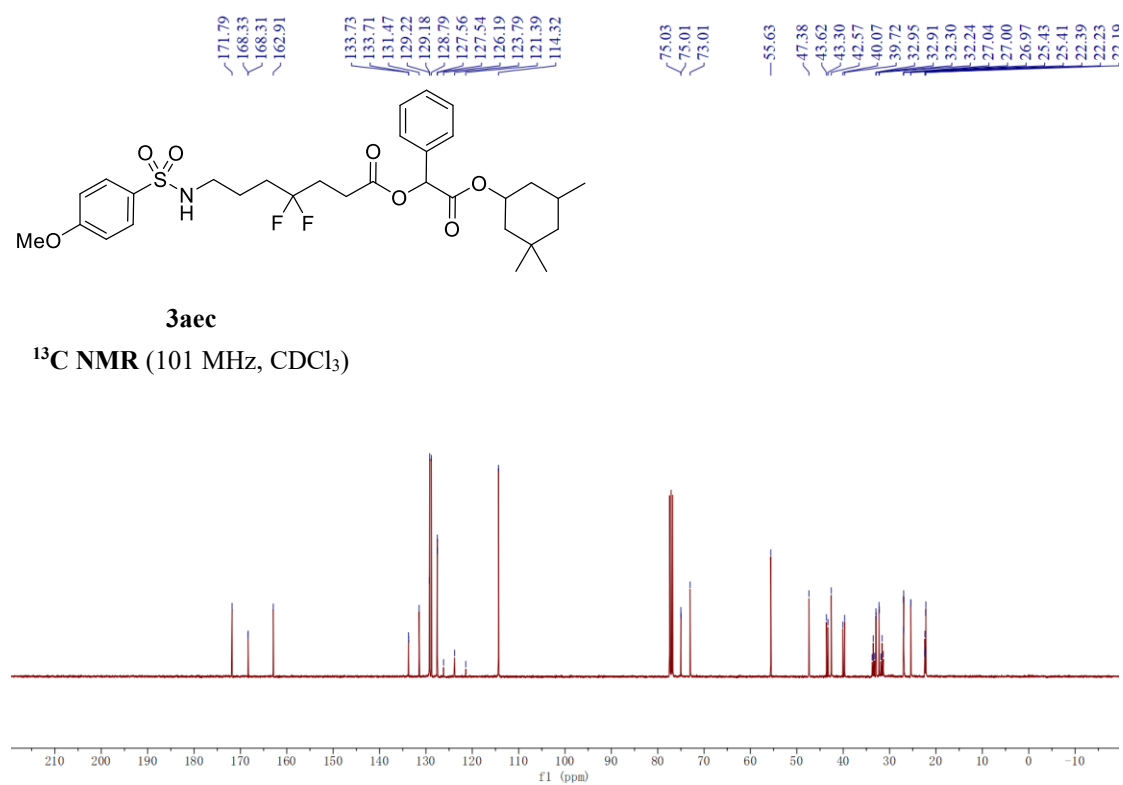

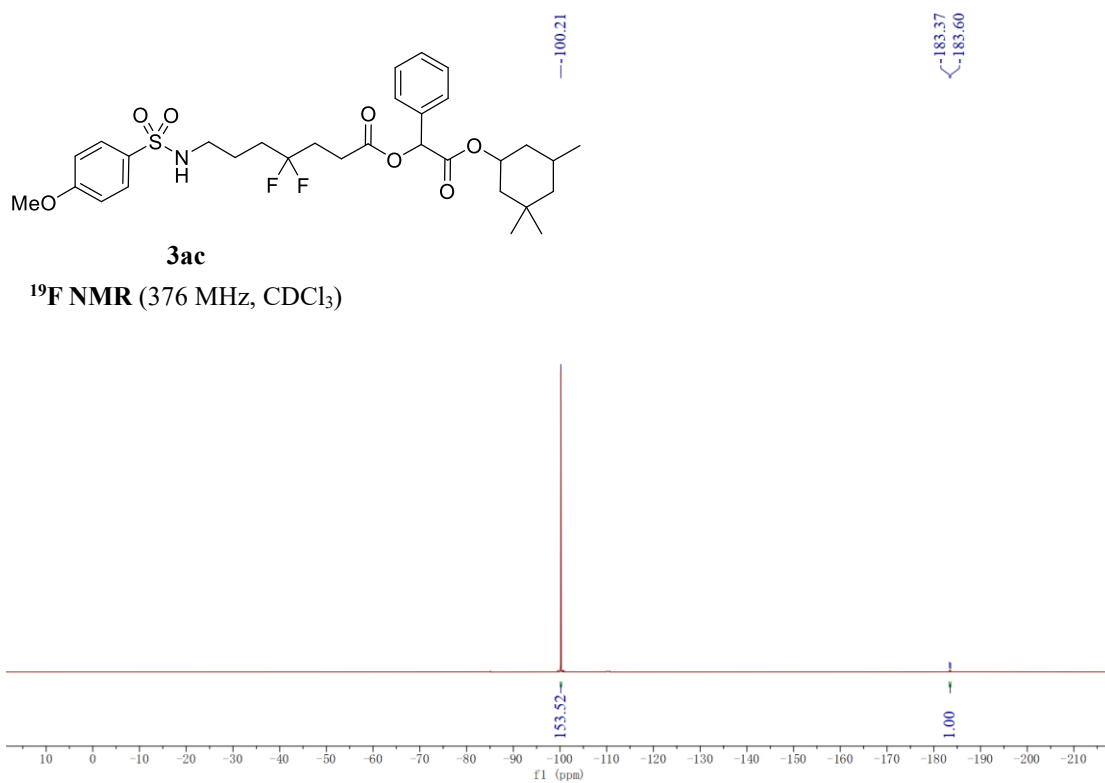

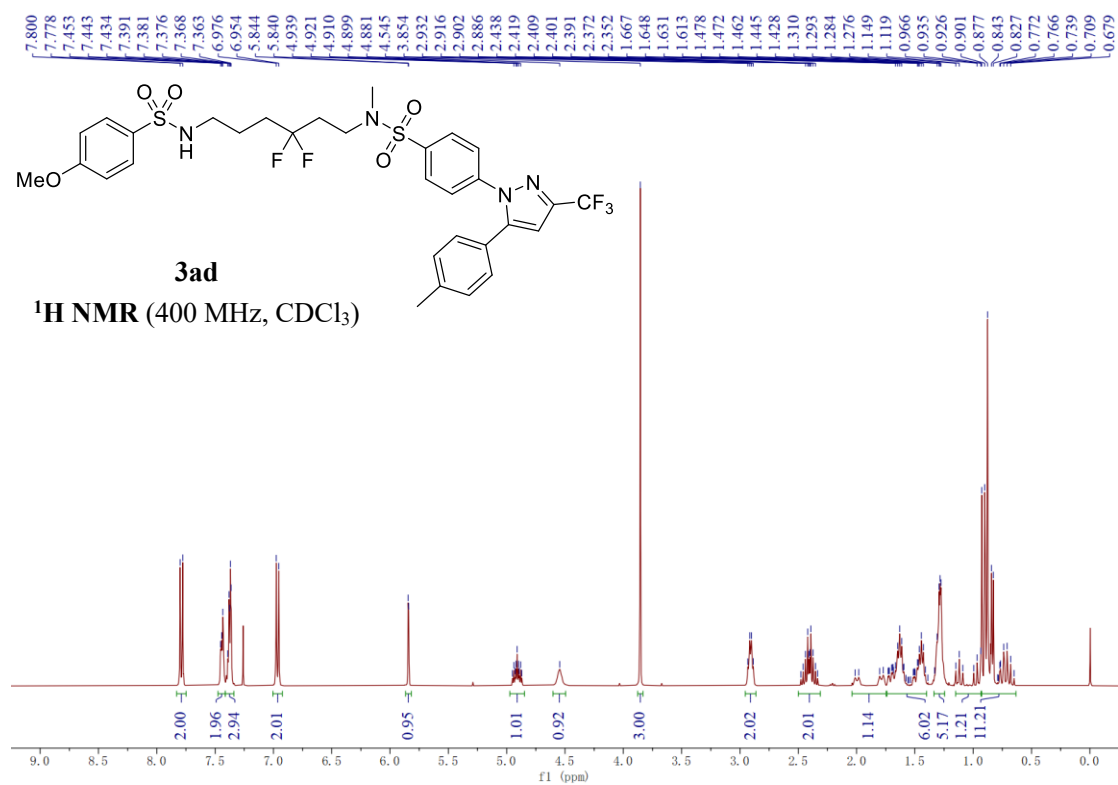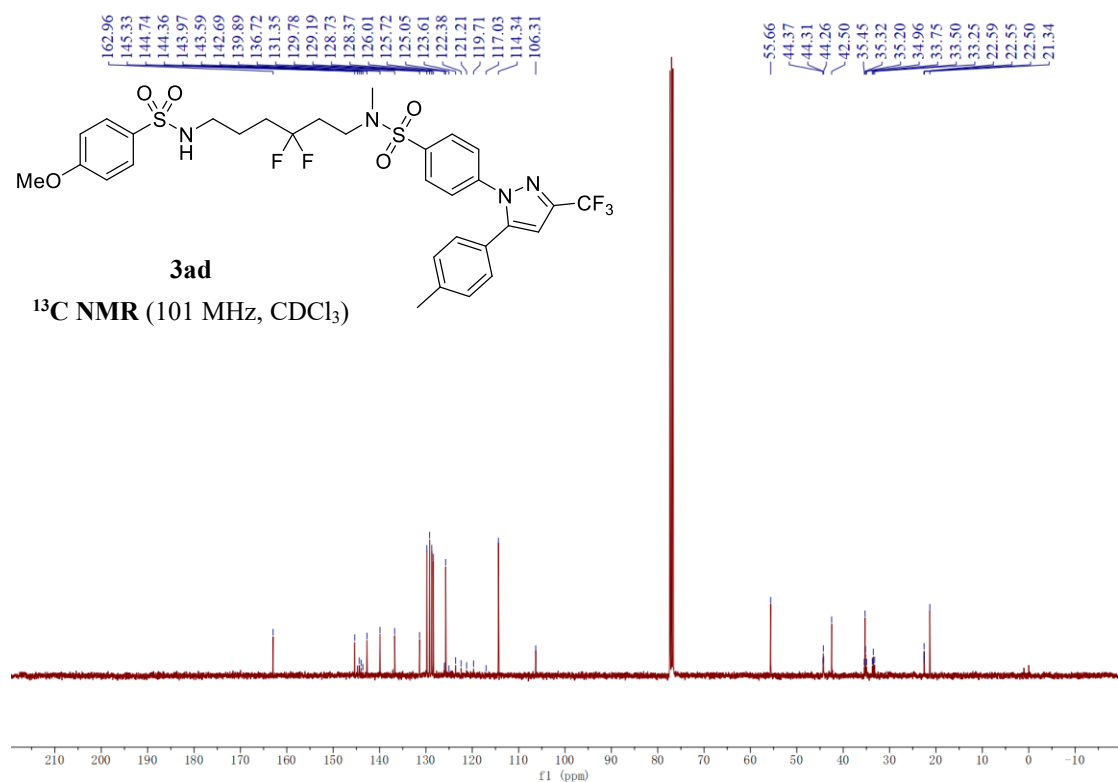

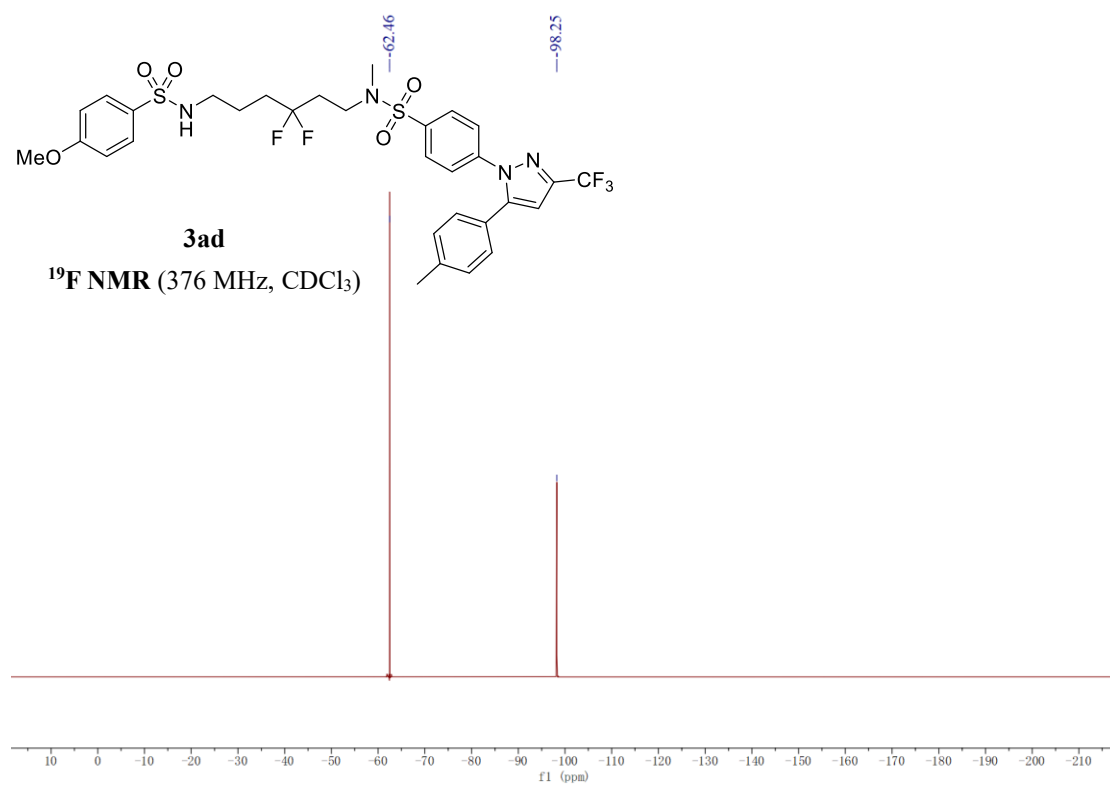

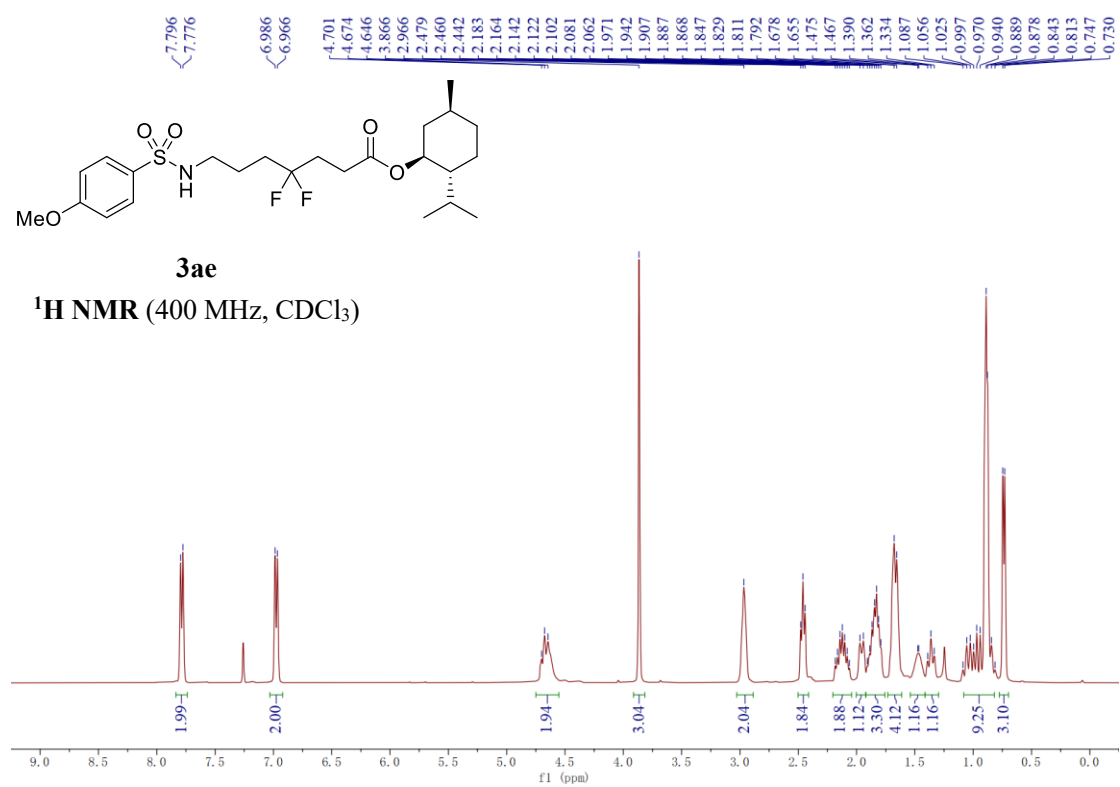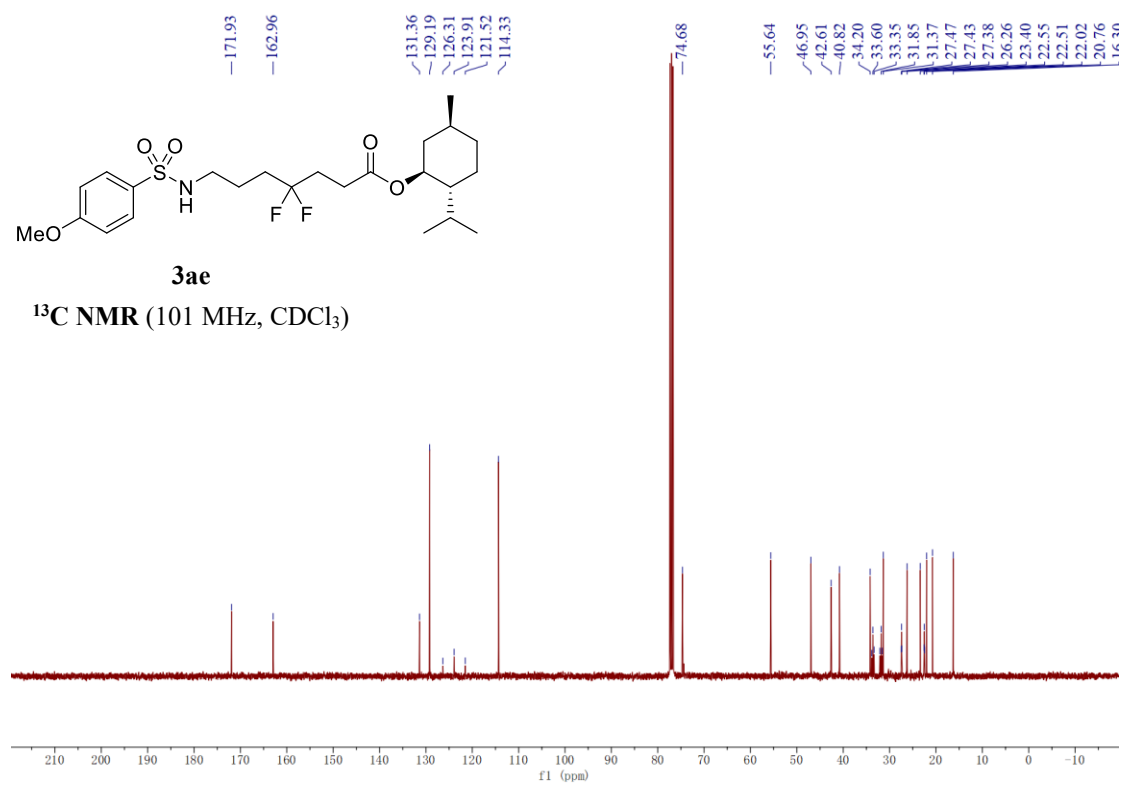

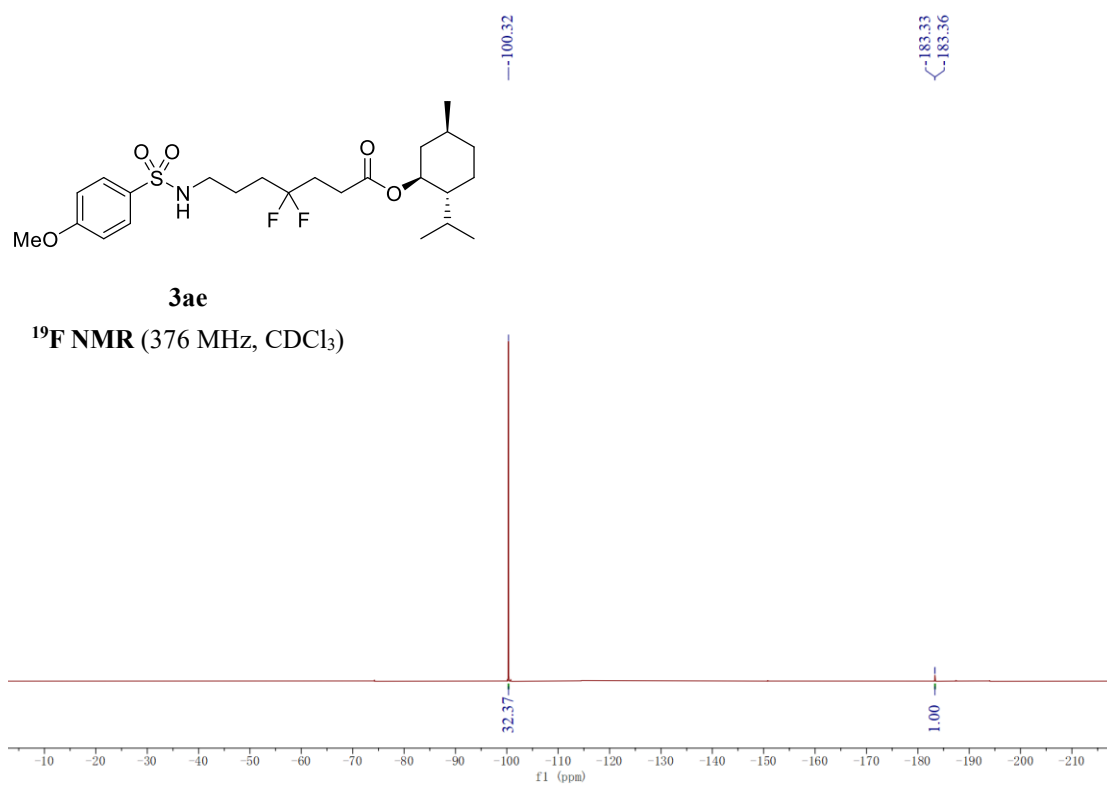

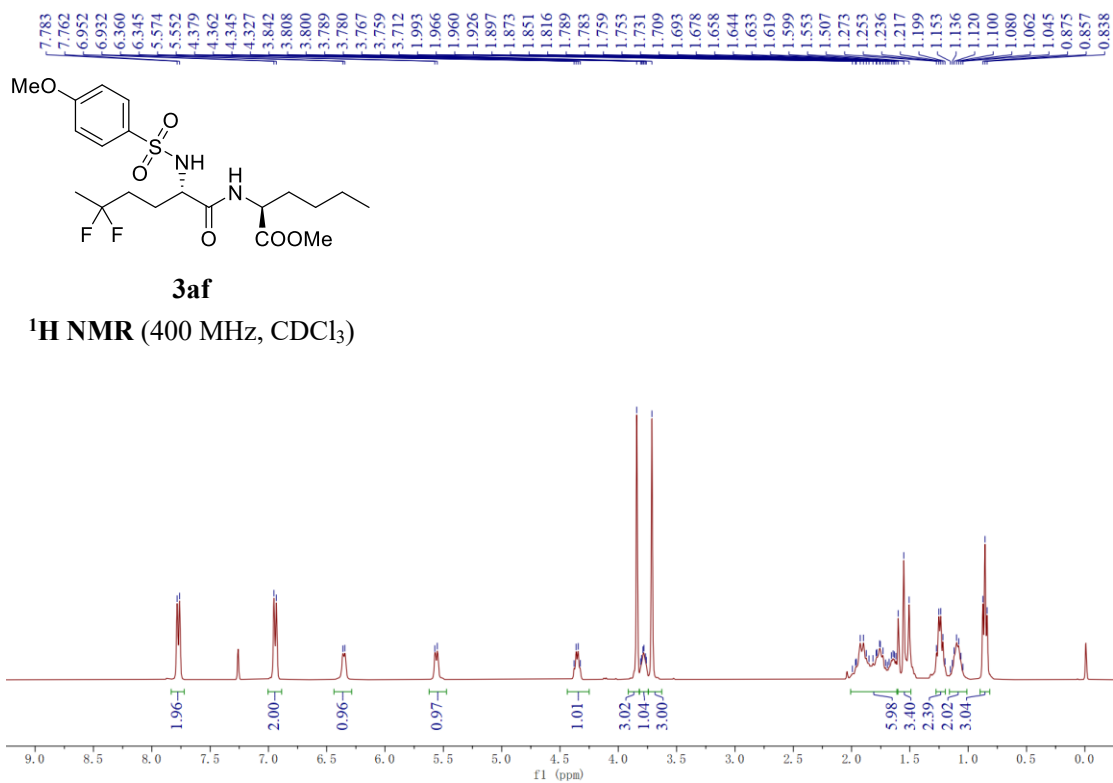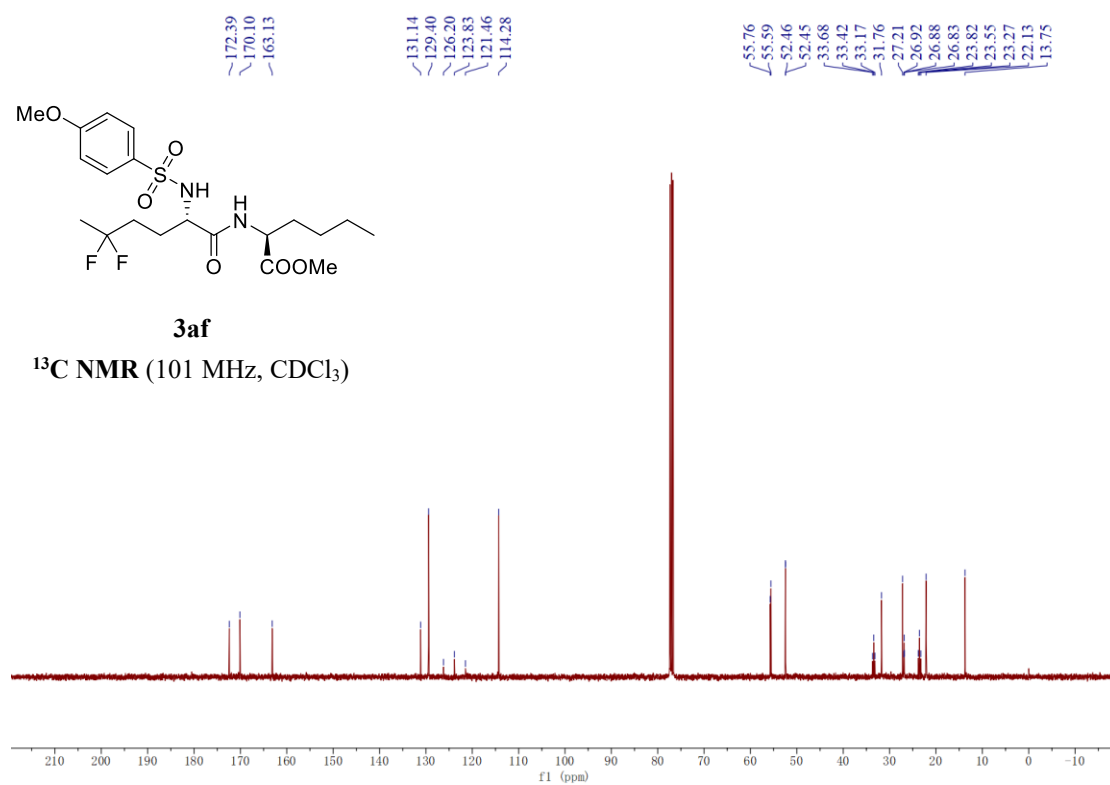

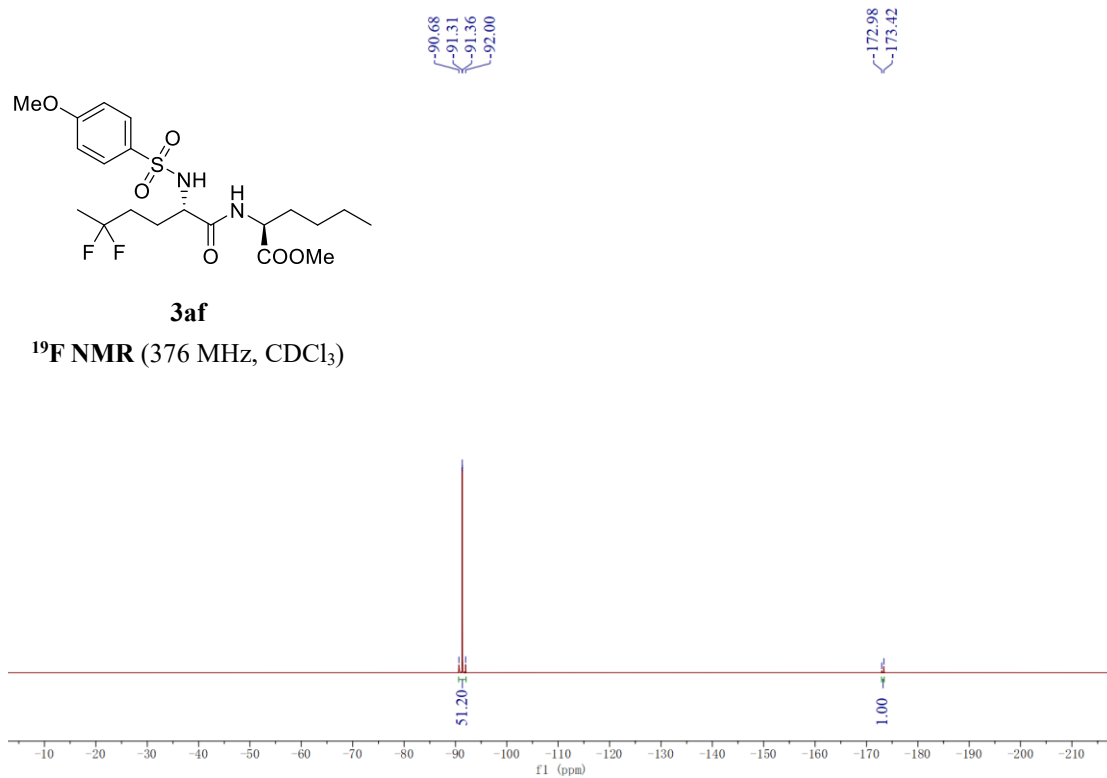



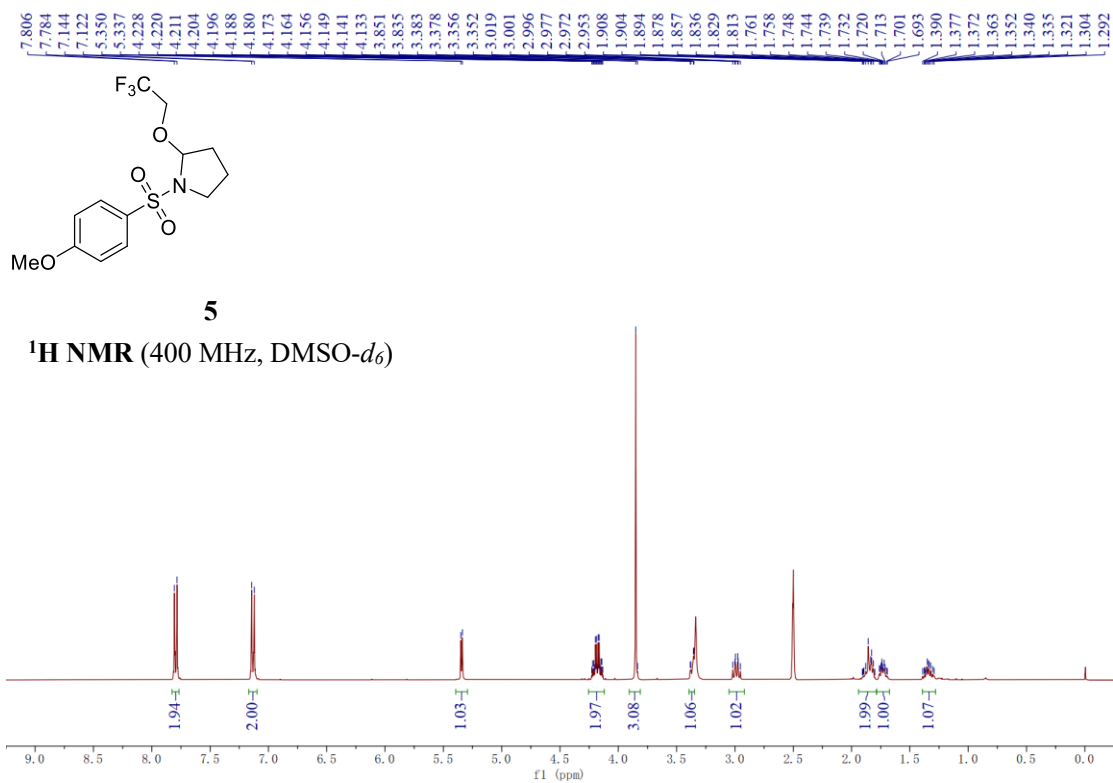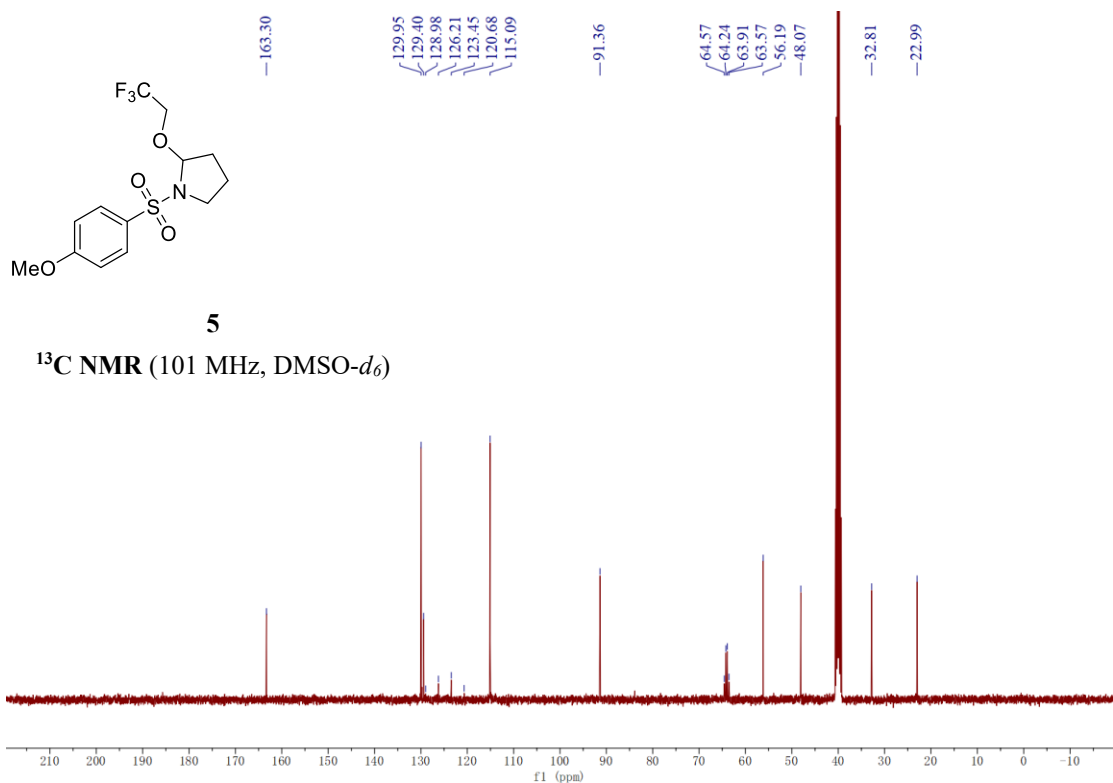

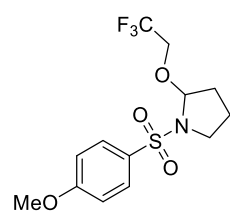

**5**

**<sup>19</sup>F NMR (376 MHz, DMSO-*d*<sub>6</sub>)**

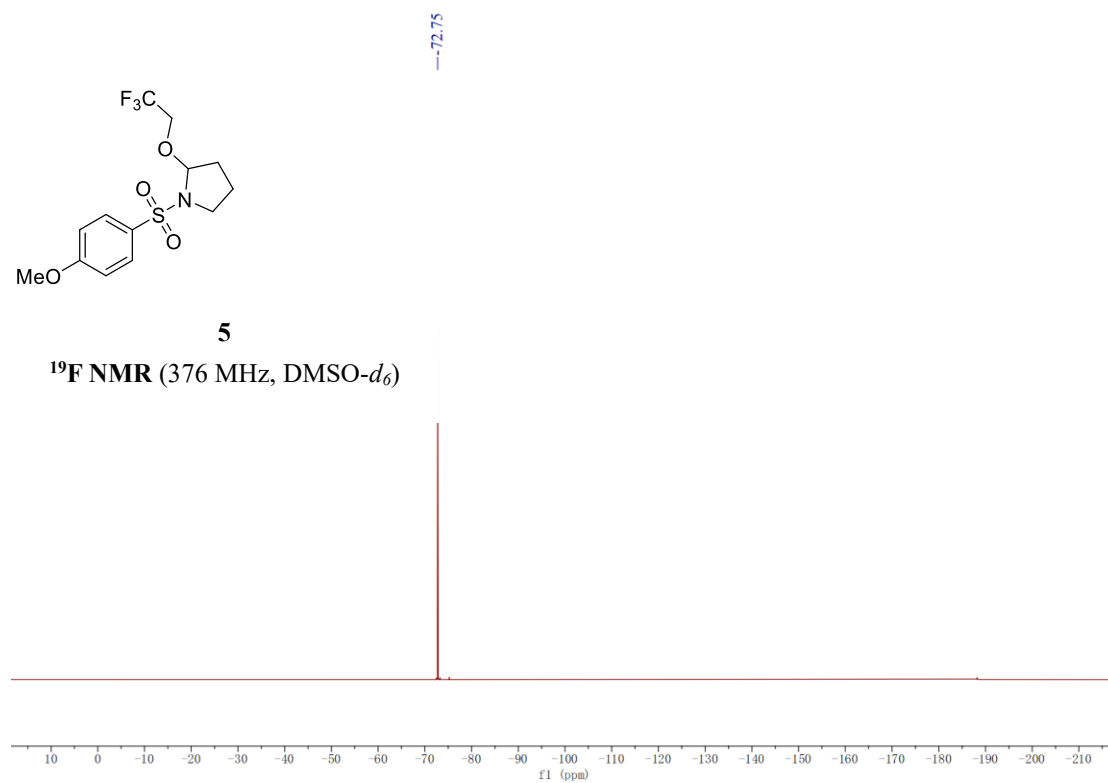

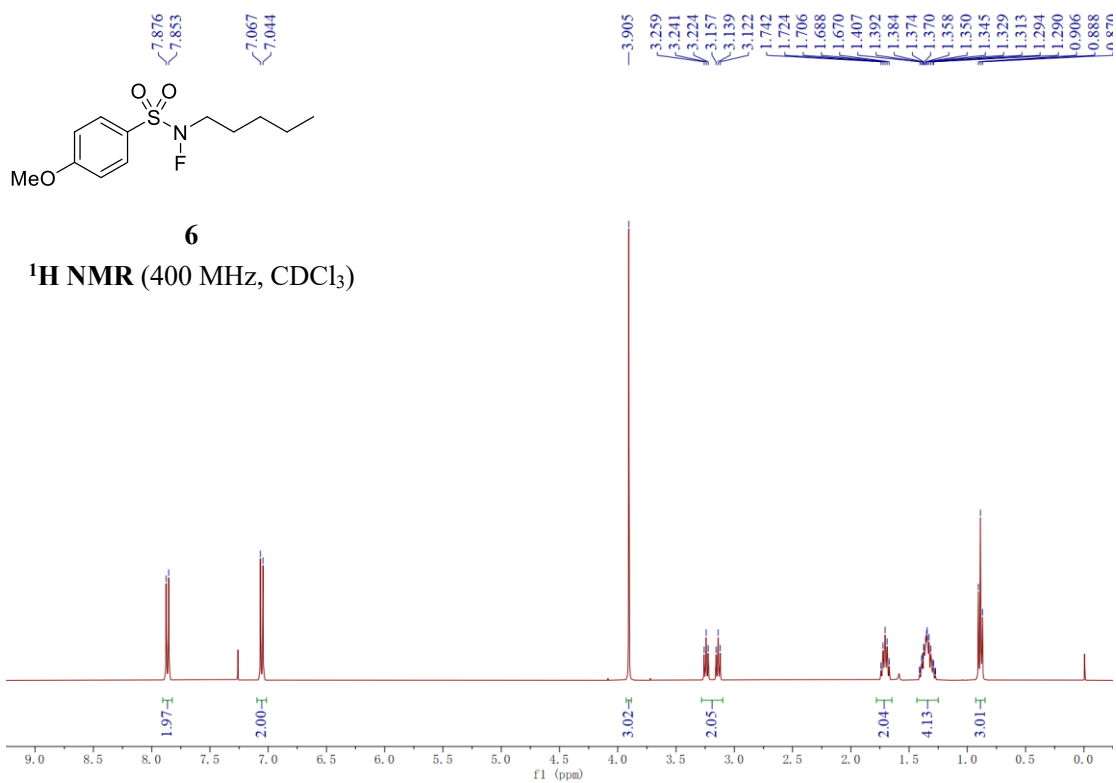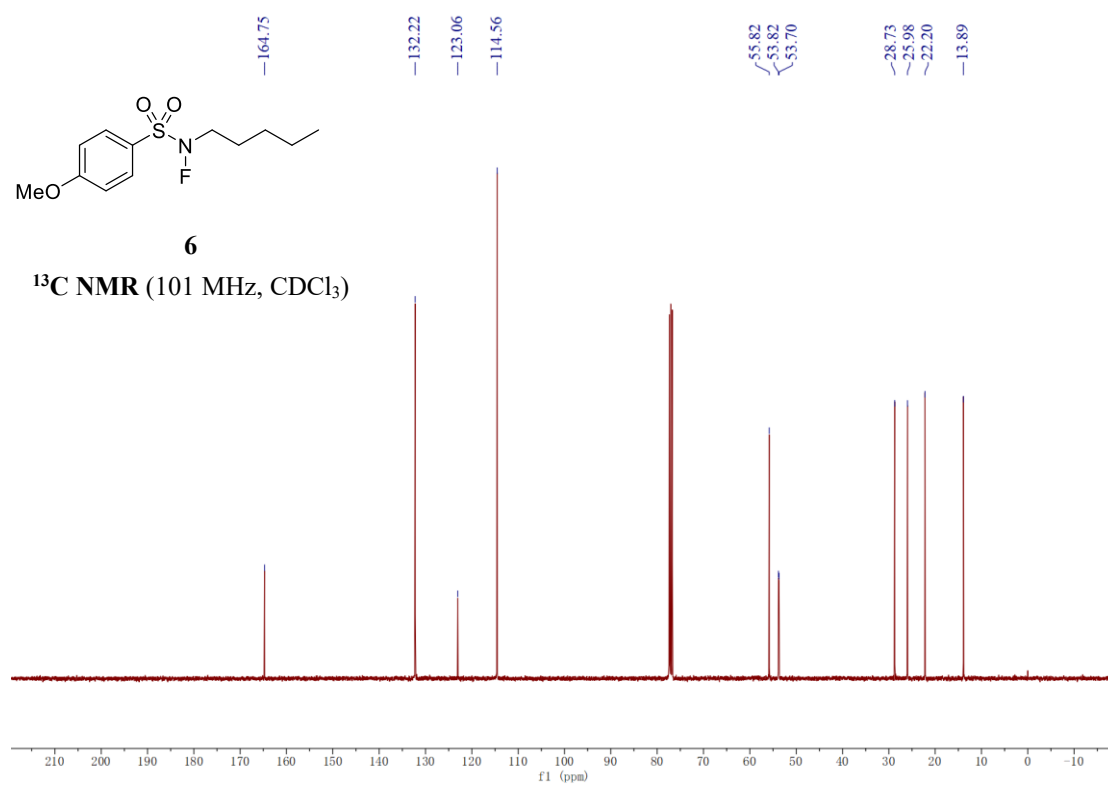

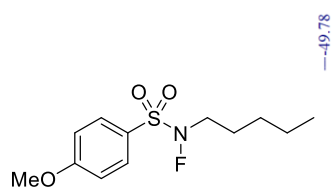

-49.78

**6**

**$^{19}\text{F}$  NMR** (376 MHz, DMSO- $d_6$ )

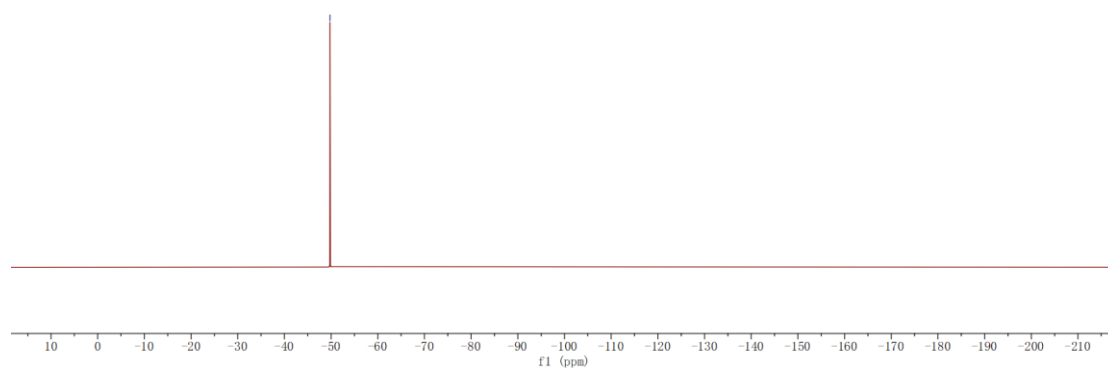

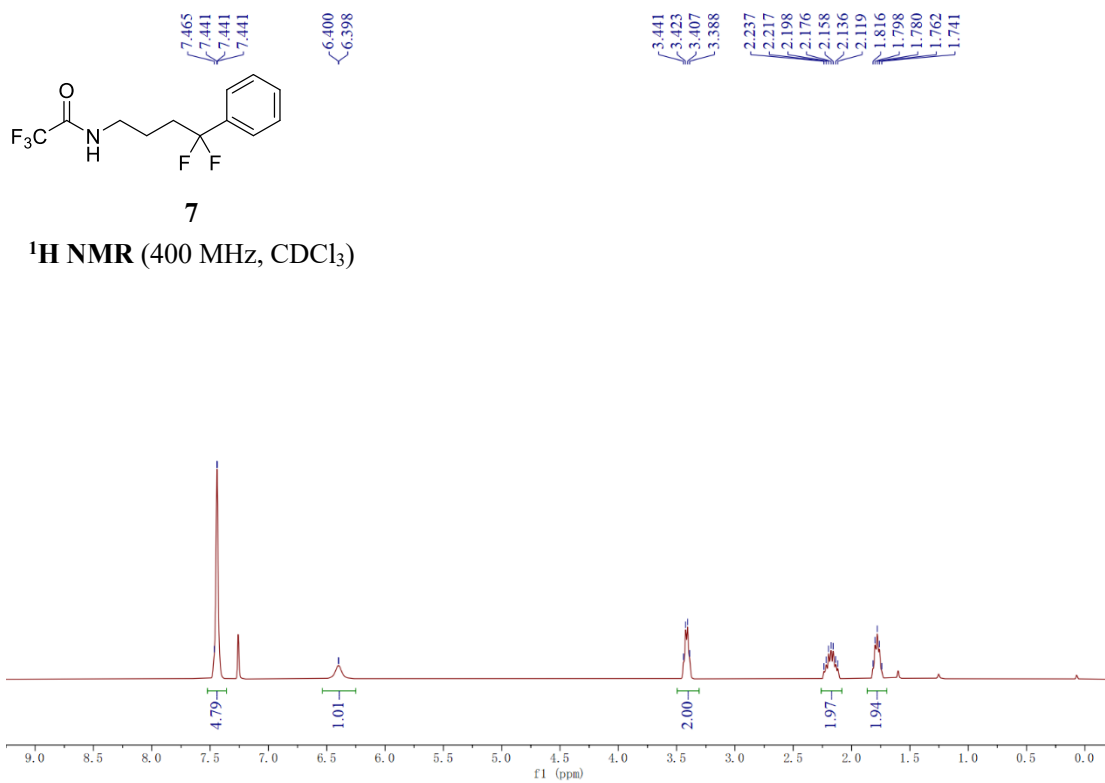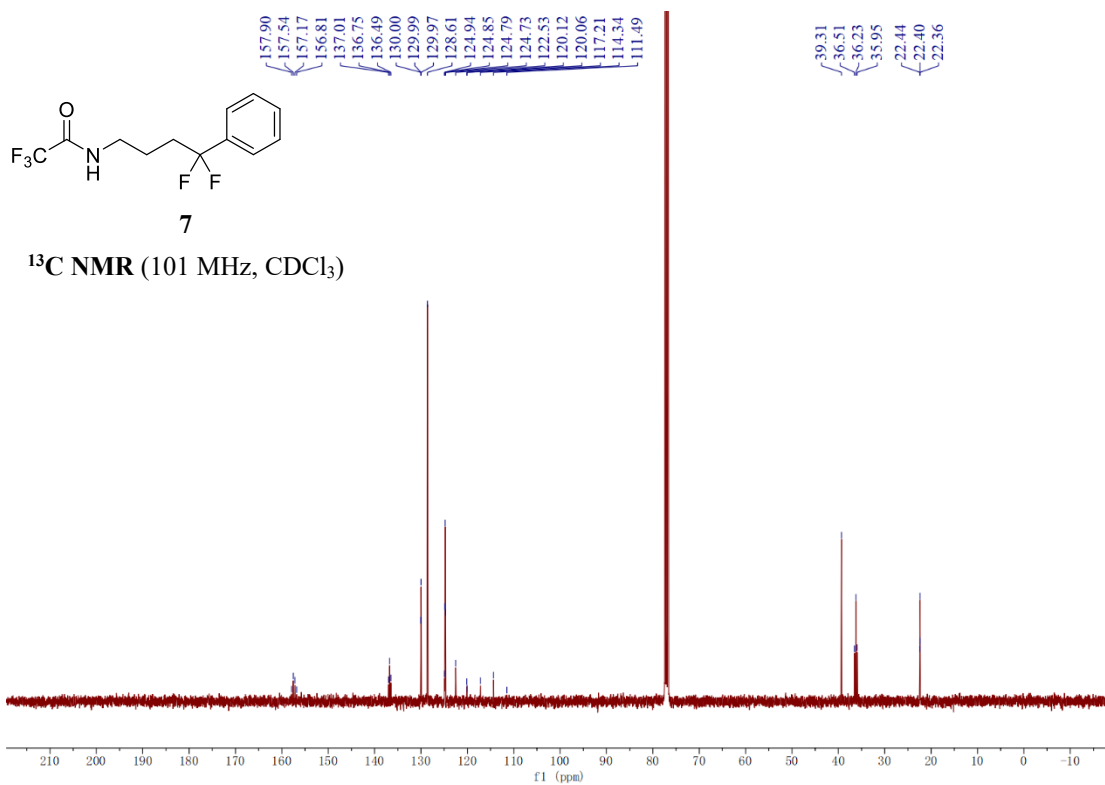

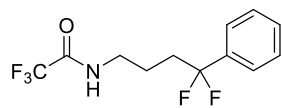

7

$^{19}\text{F}$  NMR (376 MHz,  $\text{CDCl}_3$ )

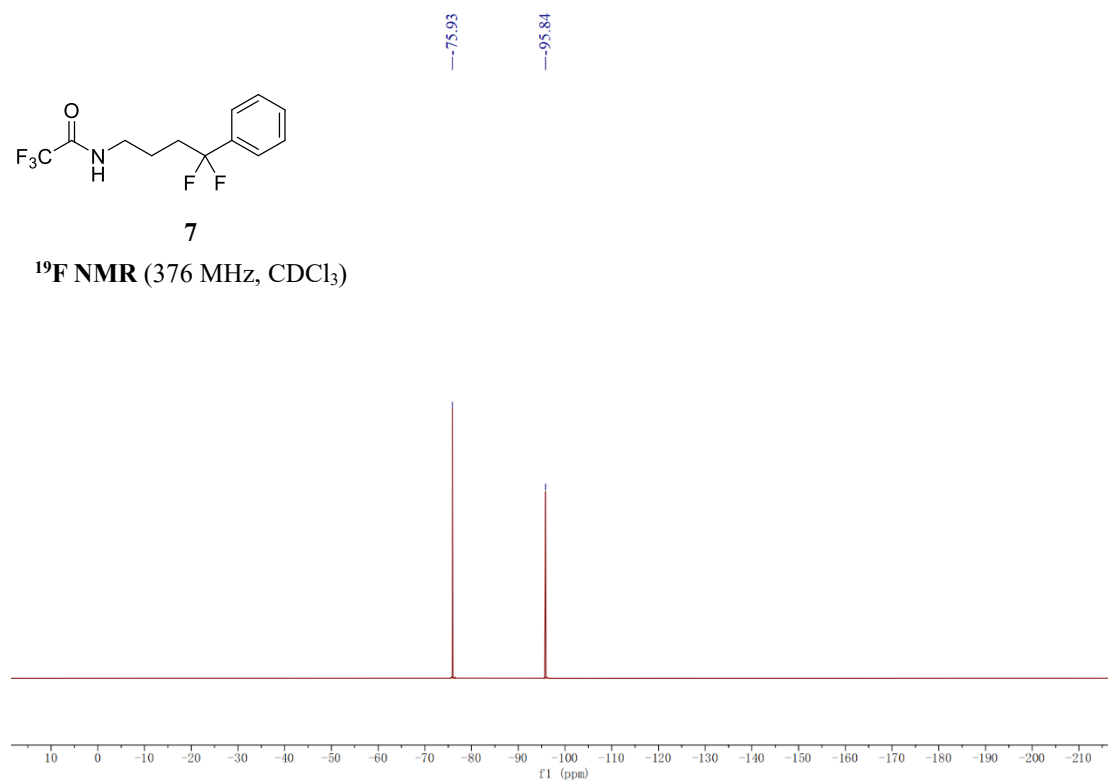

Supplement: d3qo00931a1.pdf [file d3qo00931a1.pdf]
